# Supplementary material for: Portable, non-destructive colorimetry and visible reflectance spectroscopy paired with machine learning can classify experimentally heat-treated silcrete from three South African sources
Source: PLoS One. 2022 Apr 8;17(4):e0266389. doi: 10.1371/journal.pone.0266389 (PMC8992976; doi:10.1371/journal.pone.0266389)
Supplement: S3 Table — (XLSX) [file pone.0266389.s003.xlsx]

## Sheet: CIELab k-NN_Dataset C
ID	Analyst	Processed Spectrum	Specimen Number	Nodule	Region	Scan	Side	Source	Chroma	Hue_Angle	L	A	B	Row Role	Treatment	Model C_k=5 Predictions
1	SK	Silcrete_Reflection_00001	D9.1.10B.31	10B	South Africa	1	Dorsal	D9	14.958	65.783	44.215	6.136	13.641	Training	Heated	Heated
2	SK	Silcrete_Reflection_00002	D9.1.10B.31	10B	South Africa	2	Dorsal	D9	19.107	52.946	41.35	11.513	15.248	OUTLIER	Heated
3	SK	Silcrete_Reflection_00003	D9.1.10B.31	10B	South Africa	3	Dorsal	D9	19.667	54.777	50.807	11.343	16.066	Training	Heated	Heated
4	SK	Silcrete_Reflection_00004	D9.1.10B.31	10B	South Africa	4	Dorsal	D9	15.282	67.45	45.611	5.86	14.113	Training	Heated	Heated
5	SK	Silcrete_Reflection_00005	D9.1.10B.31	10B	South Africa	5	Ventral	D9	17.582	60.825	44.364	8.571	15.352	Training	Heated	Heated
6	SK	Silcrete_Reflection_00006	D9.1.10B.31	10B	South Africa	6	Ventral	D9	23.872	56.219	55.451	13.273	19.842	OUTLIER	Heated
7	SK	Silcrete_Reflection_00007	D9.1.10B.31	10B	South Africa	7	Ventral	D9	19.097	59.117	42.054	9.802	16.389	Training	Heated	Heated
8	SK	Silcrete_Reflection_00008	D9.1.10B.31	10B	South Africa	8	Ventral	D9	15.845	63.546	50.832	7.059	14.186	Training	Heated	Heated
9	SK	Silcrete_Reflection_00009	D9.1.10B.39	10B	South Africa	1	Dorsal	D9	15.845	63.546	50.832	7.059	14.186	Training	Heated	Heated
10	SK	Silcrete_Reflection_00010	D9.1.10B.39	10B	South Africa	2	Dorsal	D9	31.153	69.499	51.793	10.91	29.18	Training	Heated	Heated
11	SK	Silcrete_Reflection_00011	D9.1.10B.39	10B	South Africa	3	Dorsal	D9	38.337	74.549	71.932	10.213	36.952	Training	Heated	Heated
12	SK	Silcrete_Reflection_00012	D9.1.10B.39	10B	South Africa	4	Dorsal	D9	33.512	71.521	56.259	10.622	31.784	Training	Heated	Heated
13	SK	Silcrete_Reflection_00013	D9.1.10B.39	10B	South Africa	5	Ventral	D9	33.533	77.826	59.427	7.072	32.779	Training	Heated	Heated
14	SK	Silcrete_Reflection_00014	D9.1.10B.39	10B	South Africa	6	Ventral	D9	28.985	78.345	63.239	5.856	28.387	Training	Heated	Heated
15	SK	Silcrete_Reflection_00015	D9.1.10B.39	10B	South Africa	7	Ventral	D9	37.801	65.861	58.522	15.459	34.495	Training	Heated	Heated
16	SK	Silcrete_Reflection_00016	D9.1.10B.39	10B	South Africa	8	Ventral	D9	26.263	77.296	56.56	5.775	25.62	Training	Heated	Heated
17	JM	Silcrete_Reflection_00017	D9.1.12D.49	12D	South Africa	1	Dorsal	D9	25.689	86.325	58.184	1.647	25.636	Training	Heated	Unheated
18	JM	Silcrete_Reflection_00018	D9.1.12D.49	12D	South Africa	2	Dorsal	D9	29.997	83.427	65.088	3.434	29.8	Training	Heated	Unheated
19	JM	Silcrete_Reflection_00019	D9.1.12D.49	12D	South Africa	3	Dorsal	D9	23.734	83.831	52.842	2.55	23.596	Training	Heated	Heated
20	JM	Silcrete_Reflection_00020	D9.1.12D.49	12D	South Africa	4	Dorsal	D9	31.489	75.956	58.309	7.641	30.548	Training	Heated	Heated
21	JM	Silcrete_Reflection_00021	D9.1.12D.49	12D	South Africa	5	Ventral	D9	29.028	85.478	64.59	2.289	28.937	Training	Heated	Unheated
22	JM	Silcrete_Reflection_00022	D9.1.12D.49	12D	South Africa	6	Ventral	D9	33.238	65.115	42.523	13.987	30.152	Training	Heated	Heated
23	JM	Silcrete_Reflection_00023	D9.1.12D.49	12D	South Africa	7	Ventral	D9	27.801	82.649	62.257	3.557	27.573	Training	Heated	Unheated
24	JM	Silcrete_Reflection_00024	D9.1.12D.49	12D	South Africa	8	Ventral	D9	25.835	86.503	57.014	1.576	25.787	Training	Heated	Unheated
25	JM	Silcrete_Reflection_00025	D9.1.12D.50	12D	South Africa	1	Dorsal	D9	32.181	87.487	76.442	1.411	32.15	Training	Heated	Unheated
26	JM	Silcrete_Reflection_00026	D9.1.12D.50	12D	South Africa	2	Dorsal	D9	27.128	85.454	58.732	2.15	27.042	Training	Heated	Unheated
27	JM	Silcrete_Reflection_00027	D9.1.12D.50	12D	South Africa	3	Dorsal	D9	35.169	68.859	54.139	12.684	32.802	Training	Heated	Heated
28	JM	Silcrete_Reflection_00028	D9.1.12D.50	12D	South Africa	4	Dorsal	D9	23.14	87.012	54.941	1.206	23.108	Training	Heated	Unheated
29	JM	Silcrete_Reflection_00029	D9.1.12D.50	12D	South Africa	5	Ventral	D9	36.348	70.915	55.672	11.885	34.351	Training	Heated	Heated
30	JM	Silcrete_Reflection_00030	D9.1.12D.50	12D	South Africa	6	Ventral	D9	41.35	77.528	73.969	8.93	40.375	Training	Heated	Heated
31	JM	Silcrete_Reflection_00031	D9.1.12D.50	12D	South Africa	7	Ventral	D9	27.512	78.91	57.224	5.292	26.999	Training	Heated	Heated
32	JM	Silcrete_Reflection_00032	D9.1.12D.50	12D	South Africa	8	Ventral	D9	30.755	84.1	66.6	3.161	30.593	Training	Heated	Unheated
33	SK	Silcrete_Reflection_00033	D9.1.12C.36	12C	South Africa	1	Dorsal	D9	26.349	85.682	64.912	1.984	26.274	Validation	Unheated	Unheated
34	SK	Silcrete_Reflection_00034	D9.1.12C.36	12C	South Africa	2	Dorsal	D9	24.048	85.344	58.388	1.952	23.969	Validation	Unheated	Unheated
35	SK	Silcrete_Reflection_00035	D9.1.12C.36	12C	South Africa	3	Dorsal	D9	24.049	85.181	57.981	2.02	23.964	Validation	Unheated	Unheated
36	SK	Silcrete_Reflection_00036	D9.1.12C.36	12C	South Africa	4	Dorsal	D9	24.737	85.221	60.117	2.061	24.651	Validation	Unheated	Unheated
37	SK	Silcrete_Reflection_00037	D9.1.12C.36	12C	South Africa	5	Ventral	D9	31.494	85.582	75.074	2.426	31.4	Validation	Unheated	Unheated
38	SK	Silcrete_Reflection_00038	D9.1.12C.36	12C	South Africa	6	Ventral	D9	27.228	85.124	64.885	2.314	27.129	Validation	Unheated	Unheated
39	SK	Silcrete_Reflection_00039	D9.1.12C.36	12C	South Africa	7	Ventral	D9	30.156	84.98	70.665	2.639	30.04	Validation	Unheated	Unheated
40	SK	Silcrete_Reflection_00040	D9.1.12C.36	12C	South Africa	8	Ventral	D9	33.549	86.344	88.466	2.139	33.481	Validation	Unheated	Unheated
41	SK	Silcrete_Reflection_00041	D9.1.12B.25	12B	South Africa	1	Dorsal	D9	13.144	60.221	42.104	6.528	11.408	Test	Heated	Heated
42	SK	Silcrete_Reflection_00042	D9.1.12B.25	12B	South Africa	2	Dorsal	D9	12.743	57.683	37.354	6.812	10.769	OUTLIER	Heated
43	SK	Silcrete_Reflection_00043	D9.1.12B.25	12B	South Africa	3	Dorsal	D9	13.062	50.803	28.59	8.255	10.123	OUTLIER	Heated
44	SK	Silcrete_Reflection_00044	D9.1.12B.25	12B	South Africa	4	Dorsal	D9	12.522	77.839	56.172	2.638	12.241	Test	Heated	Heated
45	SK	Silcrete_Reflection_00045	D9.1.12B.25	12B	South Africa	5	Ventral	D9	16.646	52.58	37.479	10.115	13.22	OUTLIER	Heated
46	SK	Silcrete_Reflection_00046	D9.1.12B.25	12B	South Africa	6	Ventral	D9	16.307	71.48	53.499	5.18	15.463	Test	Heated	Heated
47	SK	Silcrete_Reflection_00047	D9.1.12B.25	12B	South Africa	7	Ventral	D9	18.29	57.242	43.991	9.897	15.381	Test	Heated	Heated
48	SK	Silcrete_Reflection_00048	D9.1.12B.25	12B	South Africa	8	Ventral	D9	19.633	57.13	48.291	10.655	16.49	Test	Heated	Heated
49	SK	Silcrete_Reflection_00049	D9.1.10A.16	10A	South Africa	1	Dorsal	D9	16.057	84.78	67.843	1.461	15.991	OUTLIER	Unheated
50	SK	Silcrete_Reflection_00050	D9.1.10A.16	10A	South Africa	2	Dorsal	D9	9.39	83.659	55.281	1.037	9.333	Test	Unheated	Unheated
51	SK	Silcrete_Reflection_00051	D9.1.10A.16	10A	South Africa	3	Dorsal	D9	11.485	83.308	46.957	1.338	11.407	Test	Unheated	Heated
52	SK	Silcrete_Reflection_00052	D9.1.10A.16	10A	South Africa	4	Dorsal	D9	14.044	81.434	53.834	2.092	13.887	Test	Unheated	Heated
53	SK	Silcrete_Reflection_00053	D9.1.10A.16	10A	South Africa	5	Ventral	D9	13.256	82.126	71.365	1.816	13.131	OUTLIER	Unheated
54	SK	Silcrete_Reflection_00054	D9.1.10A.16	10A	South Africa	6	Ventral	D9	10.476	87.406	57.519	0.474	10.465	Test	Unheated	Unheated
55	SK	Silcrete_Reflection_00055	D9.1.10A.16	10A	South Africa	7	Ventral	D9	10.36	83.804	50.443	1.118	10.299	Test	Unheated	Unheated
56	SK	Silcrete_Reflection_00056	D9.1.10A.16	10A	South Africa	8	Ventral	D9	15.752	81.502	54.084	2.328	15.579	Test	Unheated	Heated
57	SK	Silcrete_Reflection_00057	D9.1.12D.50	12D	South Africa	1	Dorsal	D9	9.643	74.237	53.536	2.62	9.281	Training	Heated	Unheated
58	SK	Silcrete_Reflection_00058	D9.1.12D.50	12D	South Africa	2	Dorsal	D9	5.787	81.476	34.455	0.858	5.724	OUTLIER	Heated
59	SK	Silcrete_Reflection_00059	D9.1.12D.50	12D	South Africa	3	Dorsal	D9	13.317	67.105	42.831	5.181	12.268	Training	Heated	Heated
60	SK	Silcrete_Reflection_00060	D9.1.12D.50	12D	South Africa	4	Dorsal	D9	8.792	72.527	38.522	2.64	8.386	OUTLIER	Heated
61	SK	Silcrete_Reflection_00061	D9.1.12D.50	12D	South Africa	5	Ventral	D9	14.212	69.083	49.034	5.074	13.275	Training	Heated	Heated
62	SK	Silcrete_Reflection_00062	D9.1.12D.50	12D	South Africa	6	Ventral	D9	18.03	68.34	51.533	6.655	16.757	Training	Heated	Heated
63	SK	Silcrete_Reflection_00063	D9.1.12D.50	12D	South Africa	7	Ventral	D9	7.406	81.878	45.984	1.046	7.332	Training	Heated	Unheated
64	SK	Silcrete_Reflection_00064	D9.1.12D.50	12D	South Africa	8	Ventral	D9	9.438	83.299	53.159	1.101	9.374	Training	Heated	Unheated
65	SK	Silcrete_Reflection_00065	D9.1.12C.8	12C	South Africa	1	Dorsal	D9	7.055	84.798	50.998	0.64	7.026	Training	Unheated	Heated
66	SK	Silcrete_Reflection_00066	D9.1.12C.8	12C	South Africa	2	Dorsal	D9	9.226	86.21	55.971	0.61	9.206	Training	Unheated	Unheated
67	SK	Silcrete_Reflection_00067	D9.1.12C.8	12C	South Africa	3	Dorsal	D9	7.067	87.453	42.988	0.314	7.06	Training	Unheated	Unheated
68	SK	Silcrete_Reflection_00068	D9.1.12C.8	12C	South Africa	4	Dorsal	D9	10.437	83.183	44.692	1.239	10.363	Training	Unheated	Unheated
69	SK	Silcrete_Reflection_00069	D9.1.12C.8	12C	South Africa	5	Ventral	D9	8.34	84.73	63.761	0.766	8.305	Training	Unheated	Unheated
70	SK	Silcrete_Reflection_00070	D9.1.12C.8	12C	South Africa	6	Ventral	D9	8.48	86.587	62.461	0.505	8.465	Training	Unheated	Unheated
71	SK	Silcrete_Reflection_00071	D9.1.12C.8	12C	South Africa	7	Ventral	D9	8.228	86.226	51.625	0.542	8.21	Training	Unheated	Heated
72	SK	Silcrete_Reflection_00072	D9.1.12C.8	12C	South Africa	8	Ventral	D9	12.211	85.075	68.089	1.048	12.166	Training	Unheated	Unheated
73	SK	Silcrete_Reflection_00073	E3.1.1B.8	1B	South Africa	1	Dorsal	E3	17.346	44.321	25.224	12.41	12.119	Training	Heated	Heated
74	SK	Silcrete_Reflection_00074	E3.1.1B.8	1B	South Africa	2	Dorsal	E3	19.959	51.853	26.761	12.328	15.696	Training	Heated	Heated
75	SK	Silcrete_Reflection_00075	E3.1.1B.8	1B	South Africa	3	Dorsal	E3	17.864	47.579	22.417	12.05	13.187	Training	Heated	Heated
76	SK	Silcrete_Reflection_00076	E3.1.1B.8	1B	South Africa	4	Dorsal	E3	18.623	45.483	24.891	13.057	13.279	Training	Heated	Heated
77	SK	Silcrete_Reflection_00077	E3.1.1B.8	1B	South Africa	5	Ventral	E3	17.987	37.243	28.472	14.319	10.886	Training	Heated	Heated
78	SK	Silcrete_Reflection_00078	E3.1.1B.8	1B	South Africa	6	Ventral	E3	18.549	38.459	34.267	14.525	11.537	Training	Heated	Heated
79	SK	Silcrete_Reflection_00079	E3.1.1B.8	1B	South Africa	7	Ventral	E3	19.05	40.641	32.354	14.455	12.408	Training	Heated	Heated
80	SK	Silcrete_Reflection_00080	E3.1.1B.8	1B	South Africa	8	Ventral	E3	17.004	38.552	24.082	13.298	10.597	Training	Heated	Heated
81	JM	Silcrete_Reflection_00081	E3.1.1B.18	1B	South Africa	1	Dorsal	E3	33.333	49.344	40.531	21.717	25.287	Training	Heated	Heated
82	JM	Silcrete_Reflection_00082	E3.1.1B.18	1B	South Africa	2	Dorsal	E3	31.673	52.314	34.569	19.363	25.065	Training	Heated	Heated
83	JM	Silcrete_Reflection_00083	E3.1.1B.18	1B	South Africa	3	Dorsal	E3	31.865	54.418	36.33	18.541	25.915	Training	Heated	Heated
84	JM	Silcrete_Reflection_00084	E3.1.1B.18	1B	South Africa	4	Dorsal	E3	29.566	50.678	35.62	18.735	22.873	Training	Heated	Heated
85	JM	Silcrete_Reflection_00085	E3.1.1B.18	1B	South Africa	5	Ventral	E3	34.311	49.159	39.175	22.438	25.957	Training	Heated	Heated
86	JM	Silcrete_Reflection_00086	E3.1.1B.18	1B	South Africa	6	Ventral	E3	30.657	54.56	36.33	17.776	24.977	Training	Heated	Heated
87	JM	Silcrete_Reflection_00087	E3.1.1B.18	1B	South Africa	7	Ventral	E3	30.654	54.034	42.298	18.004	24.81	Training	Heated	Heated
88	JM	Silcrete_Reflection_00088	E3.1.1B.18	1B	South Africa	8	Ventral	E3	28.176	51.9	34.849	17.386	22.172	Training	Heated	Heated
89	JM	Silcrete_Reflection_00089	D9.1.12C.16	12C	South Africa	1	Dorsal	D9	30.236	86.691	78.683	1.745	30.185	Test	Unheated	Unheated
90	JM	Silcrete_Reflection_00090	D9.1.12C.16	12C	South Africa	2	Dorsal	D9	31.024	83.424	59.789	3.553	30.82	Test	Unheated	Unheated
91	JM	Silcrete_Reflection_00091	D9.1.12C.16	12C	South Africa	3	Dorsal	D9	29.348	86.123	72.131	1.984	29.281	Test	Unheated	Unheated
92	JM	Silcrete_Reflection_00092	D9.1.12C.16	12C	South Africa	4	Dorsal	D9	25.34	86.147	62.13	1.703	25.283	Test	Unheated	Unheated
93	JM	Silcrete_Reflection_00093	D9.1.12C.16	12C	South Africa	5	Ventral	D9	23.958	86.615	61.873	1.415	23.916	Test	Unheated	Unheated
94	JM	Silcrete_Reflection_00094	D9.1.12C.16	12C	South Africa	6	Ventral	D9	25.657	86.392	66.168	1.615	25.606	Test	Unheated	Unheated
95	JM	Silcrete_Reflection_00095	D9.1.12C.16	12C	South Africa	7	Ventral	D9	25.076	86.265	60.785	1.633	25.023	Test	Unheated	Unheated
96	JM	Silcrete_Reflection_00096	D9.1.12C.16	12C	South Africa	8	Ventral	D9	27.672	87.639	75.558	1.14	27.649	Test	Unheated	Unheated
97	SK	Silcrete_Reflection_00097	D9.1.12C.40	12c	South Africa	1	Dorsal	D9	26.12	86.674	64.507	1.516	26.076	Validation	Unheated	Unheated
98	SK	Silcrete_Reflection_00098	D9.1.12C.40	12c	South Africa	2	Dorsal	D9	27.876	86.345	69.265	1.777	27.819	Validation	Unheated	Unheated
99	SK	Silcrete_Reflection_00099	D9.1.12C.40	12c	South Africa	3	Dorsal	D9	26.614	86.201	64.961	1.763	26.556	Validation	Unheated	Unheated
100	SK	Silcrete_Reflection_00100	D9.1.12C.40	12c	South Africa	4	Dorsal	D9	26.726	86.841	67.008	1.473	26.685	Validation	Unheated	Unheated
101	SK	Silcrete_Reflection_00101	D9.1.12C.40	12c	South Africa	5	Ventral	D9	21.674	85.681	48.674	1.632	21.612	Validation	Unheated	Heated
102	SK	Silcrete_Reflection_00102	D9.1.12C.40	12c	South Africa	6	Ventral	D9	24.25	85.494	59.695	1.905	24.175	Validation	Unheated	Unheated
103	SK	Silcrete_Reflection_00103	D9.1.12C.40	12c	South Africa	7	Ventral	D9	26.084	85.586	63.229	2.007	26.007	Validation	Unheated	Unheated
104	SK	Silcrete_Reflection_00104	D9.1.12C.40	12c	South Africa	8	Ventral	D9	26.905	86.255	66.948	1.757	26.847	Validation	Unheated	Unheated
105	SK	Silcrete_Reflection_00105	E3.1.6C.4	6C	South Africa	1	Dorsal	E3	30.732	60.971	47.975	14.913	26.871	Training	Heated	Heated
106	SK	Silcrete_Reflection_00106	E3.1.6C.4	6C	South Africa	2	Dorsal	E3	30.411	68.087	61.151	11.349	28.214	Training	Heated	Heated
107	SK	Silcrete_Reflection_00107	E3.1.6C.4	6C	South Africa	3	Dorsal	E3	31.017	68.173	64.552	11.532	28.793	Training	Heated	Heated
108	SK	Silcrete_Reflection_00108	E3.1.6C.4	6C	South Africa	4	Dorsal	E3	38.333	56.972	48.177	20.894	32.138	Training	Heated	Heated
109	SK	Silcrete_Reflection_00109	E3.1.6C.4	6C	South Africa	5	Ventral	E3	38.075	60.711	38.66	18.627	33.207	Training	Heated	Heated
110	SK	Silcrete_Reflection_00110	E3.1.6C.4	6C	South Africa	6	Ventral	E3	33.857	61.487	54.936	16.162	29.751	Training	Heated	Heated
111	SK	Silcrete_Reflection_00111	E3.1.6C.4	6C	South Africa	7	Ventral	E3	47.349	52.755	49.053	28.656	37.692	Training	Heated	Unheated
112	SK	Silcrete_Reflection_00112	E3.1.6C.4	6C	South Africa	8	Ventral	E3	51.83	58.763	60.116	26.878	44.316	Training	Heated	Heated
113	SK	Silcrete_Reflection_00113	E3.1.1B.27	1b	South Africa	1	Dorsal	E3	37.468	51.2	51.418	23.478	29.2	Training	Heated	Heated
114	SK	Silcrete_Reflection_00114	E3.1.1B.27	1b	South Africa	2	Dorsal	E3	30.982	53.2	40.785	18.559	24.808	Training	Heated	Heated
115	SK	Silcrete_Reflection_00115	E3.1.1B.27	1b	South Africa	3	Dorsal	E3	32.319	51.914	43.553	19.936	25.438	Training	Heated	Heated
116	SK	Silcrete_Reflection_00116	E3.1.1B.27	1b	South Africa	4	Dorsal	E3	30.243	51.478	36.766	18.836	23.661	Training	Heated	Heated
117	SK	Silcrete_Reflection_00117	E3.1.1B.27	1b	South Africa	5	Ventral	E3	36.937	52.275	49.234	22.601	29.216	Training	Heated	Heated
118	SK	Silcrete_Reflection_00118	E3.1.1B.27	1b	South Africa	6	Ventral	E3	35.292	54.477	42.027	20.505	28.723	Training	Heated	Heated
119	SK	Silcrete_Reflection_00119	E3.1.1B.27	1b	South Africa	7	Ventral	E3	31.326	54.436	42.168	18.219	25.482	Training	Heated	Heated
120	SK	Silcrete_Reflection_00120	E3.1.1B.27	1b	South Africa	8	Ventral	E3	31.507	50.973	39.471	19.839	24.476	Training	Heated	Heated
121	SK	Silcrete_Reflection_00121	E3.1.1B.37	1B	South Africa	1	Dorsal	E3	28.475	55.932	42.603	15.951	23.588	Test	Heated	Heated
122	SK	Silcrete_Reflection_00122	E3.1.1B.37	1B	South Africa	2	Dorsal	E3	31.815	55.256	45.766	18.131	26.143	Test	Heated	Heated
123	SK	Silcrete_Reflection_00213	E3.1.1A.5	1A	South Africa	5	Ventral	E3	53.174	78.08	72.533	10.983	52.027	Training	Unheated	Unheated
123	SK	Silcrete_Reflection_00123	E3.1.1B.37	1B	South Africa	3	Dorsal	E3	33.473	54.871	47.451	19.261	27.376	Test	Heated	Heated
124	SK	Silcrete_Reflection_00124	E3.1.1B.37	1B	South Africa	4	Dorsal	E3	26.027	54.368	36.233	15.163	21.154	Test	Heated	Heated
125	SK	Silcrete_Reflection_00125	E3.1.1B.37	1B	South Africa	5	Ventral	E3	28.176	53.622	35.258	16.712	22.686	Test	Heated	Heated
126	SK	Silcrete_Reflection_00126	E3.1.1B.37	1B	South Africa	6	Ventral	E3	32.292	56.424	47.432	17.859	26.905	Test	Heated	Heated
127	SK	Silcrete_Reflection_00127	E3.1.1B.37	1B	South Africa	7	Ventral	E3	34.678	53.902	47.879	20.432	28.02	Test	Heated	Heated
128	SK	Silcrete_Reflection_00128	E3.1.1B.37	1B	South Africa	8	Ventral	E3	33.547	51.825	42.611	20.734	26.372	Test	Heated	Heated
129	SK	Silcrete_Reflection_00129	I14.2.16A.17	16A	South Africa	1	Dorsal	I14	36.447	86.921	76.138	1.958	36.394	Training	Unheated	Unheated
130	SK	Silcrete_Reflection_00130	I14.2.16A.17	16A	South Africa	2	Dorsal	I14	44.916	84.573	75.97	4.248	44.714	Training	Unheated	Unheated
131	SK	Silcrete_Reflection_00131	I14.2.16A.17	16A	South Africa	3	Dorsal	I14	36.721	87.363	78.891	1.689	36.682	Training	Unheated	Unheated
132	SK	Silcrete_Reflection_00132	I14.2.16A.17	16A	South Africa	4	Dorsal	I14	44.732	84.659	76.192	4.164	44.538	Training	Unheated	Unheated
133	SK	Silcrete_Reflection_00133	I14.2.16A.17	16A	South Africa	5	Ventral	I14	45.858	83.599	77.351	5.113	45.572	Training	Unheated	Unheated
134	SK	Silcrete_Reflection_00134	I14.2.16A.17	16A	South Africa	6	Ventral	I14	35.994	86.225	73.361	2.37	35.916	Training	Unheated	Unheated
135	SK	Silcrete_Reflection_00135	I14.2.16A.17	16A	South Africa	7	Ventral	I14	35.158	86.228	67.95	2.313	35.082	Training	Unheated	Unheated
136	SK	Silcrete_Reflection_00136	I14.2.16A.17	16A	South Africa	8	Ventral	I14	37.813	88.214	89.437	1.179	37.794	Training	Unheated	Unheated
137	SK	Silcrete_Reflection_00137	I14.2.16B.5	16B	South Africa	1	Dorsal	I14	34.555	78.776	66.364	6.726	33.894	Validation	Heated	Heated
138	SK	Silcrete_Reflection_00138	I14.2.16B.5	16B	South Africa	2	Dorsal	I14	32.326	77.65	57.577	6.914	31.578	Validation	Heated	Heated
139	SK	Silcrete_Reflection_00139	I14.2.16B.5	16B	South Africa	3	Dorsal	I14	31.311	77.868	55.333	6.581	30.612	Validation	Heated	Heated
140	SK	Silcrete_Reflection_00140	I14.2.16B.5	16B	South Africa	4	Dorsal	I14	36.574	76.487	68.169	8.546	35.562	Validation	Heated	Heated
141	SK	Silcrete_Reflection_00141	I14.2.16B.5	16B	South Africa	5	Ventral	I14	41.279	82.302	78.246	5.529	40.907	Validation	Heated	Unheated
142	SK	Silcrete_Reflection_00142	I14.2.16B.5	16B	South Africa	6	Ventral	I14	44.71	82.475	80.701	5.855	44.325	Validation	Heated	Unheated
143	SK	Silcrete_Reflection_00143	I14.2.16B.5	16B	South Africa	7	Ventral	I14	30.035	78.927	55.101	5.768	29.476	Validation	Heated	Heated
144	SK	Silcrete_Reflection_00144	I14.2.16B.5	16B	South Africa	8	Ventral	I14	30.767	77.546	51.664	6.635	30.043	Validation	Heated	Unheated
145	SK	Silcrete_Reflection_00145	I14.2.16A.18	16A	South Africa	1	Dorsal	I14	37.992	83.761	64.96	4.129	37.767	Training	Unheated	Unheated
146	SK	Silcrete_Reflection_00146	I14.2.16A.18	16A	South Africa	2	Dorsal	I14	32.033	88.15	74.191	1.034	32.016	Training	Unheated	Unheated
147	SK	Silcrete_Reflection_00147	I14.2.16A.18	16A	South Africa	3	Dorsal	I14	39.625	84.25	69.163	3.97	39.425	Training	Unheated	Unheated
148	SK	Silcrete_Reflection_00148	I14.2.16A.18	16A	South Africa	4	Dorsal	I14	40.294	84.281	71.895	4.015	40.093	Training	Unheated	Unheated
149	SK	Silcrete_Reflection_00149	I14.2.16A.18	16A	South Africa	5	Ventral	I14	38.999	96.492	96.811	-4.409	38.749	OUTLIER	Unheated
150	SK	Silcrete_Reflection_00150	I14.2.16A.18	16A	South Africa	6	Ventral	I14	37.26	86.869	77.481	2.035	37.205	Training	Unheated	Unheated
151	SK	Silcrete_Reflection_00151	I14.2.16A.18	16A	South Africa	7	Ventral	I14	35.303	88.08	81.665	1.183	35.284	Training	Unheated	Unheated
152	SK	Silcrete_Reflection_00152	I14.2.16A.18	16A	South Africa	8	Ventral	I14	40.162	88.475	92.051	1.069	40.147	OUTLIER	Unheated
153	JM	Silcrete_Reflection_00153	I14.2.16B.8	16B	South Africa	1	Dorsal	I14	51.972	75.847	77.799	12.708	50.394	Training	Heated	Unheated
154	JM	Silcrete_Reflection_00154	I14.2.16B.8	16B	South Africa	2	Dorsal	I14	33.335	81.298	58.64	5.043	32.952	Training	Heated	Heated
155	JM	Silcrete_Reflection_00155	I14.2.16B.8	16B	South Africa	3	Dorsal	I14	43.095	79.682	71.417	7.719	42.398	Training	Heated	Heated
156	JM	Silcrete_Reflection_00156	I14.2.16B.8	16B	South Africa	4	Dorsal	I14	43.369	82.924	76.877	5.342	43.039	Training	Heated	Unheated
157	JM	Silcrete_Reflection_00157	I14.2.16B.8	16B	South Africa	5	Ventral	I14	36.823	82.476	71.835	4.821	36.506	Training	Heated	Unheated
158	JM	Silcrete_Reflection_00158	I14.2.16B.8	16B	South Africa	6	Ventral	I14	35.172	82.387	65.808	4.66	34.862	Training	Heated	Unheated
159	JM	Silcrete_Reflection_00159	I14.2.16B.8	16B	South Africa	7	Ventral	I14	44.287	80.259	75.589	7.493	43.649	Training	Heated	Unheated
160	JM	Silcrete_Reflection_00160	I14.2.16B.8	16B	South Africa	8	Ventral	I14	36.383	81.782	66.192	5.201	36.009	Training	Heated	Unheated
161	JM	Silcrete_Reflection_00161	I14.2.16A.20	16A	South Africa	1	Dorsal	I14	38.102	82.553	63.315	4.939	37.781	Training	Unheated	Unheated
162	JM	Silcrete_Reflection_00162	I14.2.16A.20	16A	South Africa	2	Dorsal	I14	33.155	87.006	67.89	1.731	33.11	Training	Unheated	Unheated
163	JM	Silcrete_Reflection_00163	I14.2.16A.20	16A	South Africa	3	Dorsal	I14	27.762	88.125	65.382	0.908	27.747	Training	Unheated	Unheated
164	JM	Silcrete_Reflection_00164	I14.2.16A.20	16A	South Africa	4	Dorsal	I14	24.903	87.168	55.793	1.23	24.872	Training	Unheated	Heated
165	JM	Silcrete_Reflection_00165	I14.2.16A.20	16A	South Africa	5	Ventral	I14	41.432	85.043	77.094	3.58	41.277	Training	Unheated	Unheated
166	JM	Silcrete_Reflection_00166	I14.2.16A.20	16A	South Africa	6	Ventral	I14	41.601	85.563	79.301	3.219	41.476	Training	Unheated	Unheated
167	JM	Silcrete_Reflection_00167	I14.2.16A.20	16A	South Africa	7	Ventral	I14	37.151	87.918	89.34	1.35	37.126	Training	Unheated	Unheated
168	JM	Silcrete_Reflection_00168	I14.2.16A.20	16A	South Africa	8	Ventral	I14	36.842	86.548	76.105	2.219	36.775	Training	Unheated	Unheated
169	JM	Silcrete_Reflection_00169	E3.1.6B.19	6B	South Africa	1	Dorsal	E3	41.362	60.081	62.311	20.631	35.85	Training	Unheated	Unheated
170	JM	Silcrete_Reflection_00170	E3.1.6B.19	6B	South Africa	2	Dorsal	E3	38.294	58.163	54.51	20.201	32.533	Training	Unheated	Heated
171	JM	Silcrete_Reflection_00171	E3.1.6B.19	6B	South Africa	3	Dorsal	E3	43.23	56.773	61.023	23.688	36.162	Training	Unheated	Unheated
172	JM	Silcrete_Reflection_00172	E3.1.6B.19	6B	South Africa	4	Dorsal	E3	45.002	55.568	57.643	25.446	37.118	Training	Unheated	Heated
173	JM	Silcrete_Reflection_00173	E3.1.6B.19	6B	South Africa	5	Ventral	E3	47.602	58.746	61.789	24.697	40.694	Training	Unheated	Heated
174	JM	Silcrete_Reflection_00174	E3.1.6B.19	6B	South Africa	6	Ventral	E3	49.545	61.173	70.878	23.889	43.406	Training	Unheated	Unheated
175	JM	Silcrete_Reflection_00175	E3.1.6B.19	6B	South Africa	7	Ventral	E3	44.035	59.903	62.088	22.082	38.098	Training	Unheated	Unheated
176	JM	Silcrete_Reflection_00176	E3.1.6B.19	6B	South Africa	8	Ventral	E3	44.154	61.046	65.724	21.376	38.635	Training	Unheated	Unheated
177	JM	Silcrete_Reflection_00177	I14.2.16B.43	16B	South Africa	1	Dorsal	I14	33.655	74.606	54.921	8.934	32.448	Training	Heated	Heated
178	JM	Silcrete_Reflection_00178	I14.2.16B.43	16B	South Africa	2	Dorsal	I14	47.589	71.573	73.528	15.043	45.149	Training	Heated	Heated
179	JM	Silcrete_Reflection_00179	I14.2.16B.43	16B	South Africa	3	Dorsal	I14	35.233	73.467	52.954	10.026	33.776	Training	Heated	Heated
180	JM	Silcrete_Reflection_00180	I14.2.16B.43	16B	South Africa	4	Dorsal	I14	28.318	75.851	54.235	6.922	27.459	Training	Heated	Heated
181	JM	Silcrete_Reflection_00181	I14.2.16B.43	16B	South Africa	5	Ventral	I14	49.507	76.364	82.91	11.671	48.112	OUTLIER	Heated
182	JM	Silcrete_Reflection_00182	I14.2.16B.43	16B	South Africa	6	Ventral	I14	51.235	73.247	79.185	14.768	49.06	Training	Heated	Heated
183	JM	Silcrete_Reflection_00183	I14.2.16B.43	16B	South Africa	7	Ventral	I14	46.682	74.228	75.119	12.689	44.924	Training	Heated	Heated
184	JM	Silcrete_Reflection_00184	I14.2.16B.43	16B	South Africa	8	Ventral	I14	29.804	81.728	71.917	4.288	29.494	Training	Heated	Unheated
185	JM	Silcrete_Reflection_00185	I14.2.16A.24	16A	South Africa	1	Dorsal	I14	34.144	82.083	62.366	4.703	33.819	Training	Unheated	Unheated
186	JM	Silcrete_Reflection_00186	I14.2.16A.24	16A	South Africa	2	Dorsal	I14	39.127	82.369	70.05	5.196	38.781	Training	Unheated	Unheated
187	JM	Silcrete_Reflection_00187	I14.2.16A.24	16A	South Africa	3	Dorsal	I14	38.363	82.789	69.089	4.815	38.06	Training	Unheated	Unheated
188	JM	Silcrete_Reflection_00188	I14.2.16A.24	16A	South Africa	4	Dorsal	I14	40.029	83.637	76.294	4.436	39.782	Training	Unheated	Unheated
189	JM	Silcrete_Reflection_00189	I14.2.16A.24	16A	South Africa	5	Ventral	I14	45.443	82.946	84.635	5.581	45.098	Training	Unheated	Unheated
190	JM	Silcrete_Reflection_00190	I14.2.16A.24	16A	South Africa	6	Ventral	I14	33.176	86.016	82.289	2.305	33.095	Training	Unheated	Unheated
191	JM	Silcrete_Reflection_00191	I14.2.16A.24	16A	South Africa	7	Ventral	I14	35.65	88.671	94.053	0.827	35.64	OUTLIER	Unheated
192	JM	Silcrete_Reflection_00192	I14.2.16A.24	16A	South Africa	8	Ventral	I14	41.74	83.54	82.94	4.696	41.475	Training	Unheated	Unheated
193	JM	Silcrete_Reflection_00193	I14.2.16B.50	16B	South Africa	1	Dorsal	I14	28.123	81.344	59.599	4.232	27.803	Training	Heated	Heated
194	JM	Silcrete_Reflection_00194	I14.2.16B.50	16B	South Africa	2	Dorsal	I14	33.379	81.635	87.842	4.856	33.024	Training	Heated	Heated
195	JM	Silcrete_Reflection_00195	I14.2.16B.50	16B	South Africa	3	Dorsal	I14	33.715	79.984	74.427	5.864	33.201	Training	Heated	Heated
196	JM	Silcrete_Reflection_00196	I14.2.16B.50	16B	South Africa	4	Dorsal	I14	35.39	76.233	62.701	8.422	34.373	Training	Heated	Heated
197	JM	Silcrete_Reflection_00197	I14.2.16B.50	16B	South Africa	5	Ventral	I14	33.623	81.168	70.608	5.163	33.225	Training	Heated	Heated
198	JM	Silcrete_Reflection_00198	I14.2.16B.50	16B	South Africa	6	Ventral	I14	34.46	77.717	61.749	7.331	33.671	Training	Heated	Heated
199	JM	Silcrete_Reflection_00199	I14.2.16B.50	16B	South Africa	7	Ventral	I14	41.72	79.557	79.497	7.562	41.029	Training	Heated	Unheated
200	JM	Silcrete_Reflection_00200	I14.2.16B.50	16B	South Africa	8	Ventral	I14	39.06	79.697	76.532	6.986	38.43	Training	Heated	Heated
201	JM	Silcrete_Reflection_00201	I14.2.16A.9	16A	South Africa	1	Dorsal	I14	35.949	86.265	89.091	2.341	35.872	Training	Unheated	Unheated
202	JM	Silcrete_Reflection_00202	I14.2.16A.9	16A	South Africa	2	Dorsal	I14	31.143	83.362	60.182	3.6	30.934	Training	Unheated	Unheated
203	JM	Silcrete_Reflection_00203	I14.2.16A.9	16A	South Africa	3	Dorsal	I14	31.308	85.491	72.491	2.461	31.211	Training	Unheated	Unheated
204	JM	Silcrete_Reflection_00204	I14.2.16A.9	16A	South Africa	4	Dorsal	I14	26.119	85.792	62.283	1.916	26.049	Training	Unheated	Unheated
205	JM	Silcrete_Reflection_00205	I14.2.16A.9	16A	South Africa	5	Ventral	I14	43.305	83.242	79.163	5.096	43.004	Training	Unheated	Unheated
206	JM	Silcrete_Reflection_00206	I14.2.16A.9	16A	South Africa	6	Ventral	I14	35.838	85.558	87.125	2.775	35.73	Training	Unheated	Unheated
207	JM	Silcrete_Reflection_00207	I14.2.16A.9	16A	South Africa	7	Ventral	I14	33.411	85.146	77.077	2.827	33.291	Training	Unheated	Unheated
208	JM	Silcrete_Reflection_00208	I14.2.16A.9	16A	South Africa	8	Ventral	I14	31.427	85.171	74.707	2.646	31.316	Training	Unheated	Unheated
209	SK	Silcrete_Reflection_00209	E3.1.1A.5	1A	South Africa	1	Dorsal	E3	56.068	78.577	75.14	11.105	54.957	Training	Unheated	Unheated
210	SK	Silcrete_Reflection_00210	E3.1.1A.5	1A	South Africa	2	Dorsal	E3	46.366	78.324	63.433	9.384	45.406	Training	Unheated	Unheated
211	SK	Silcrete_Reflection_00211	E3.1.1A.5	1A	South Africa	3	Dorsal	E3	51.851	78.941	76.129	9.946	50.888	Training	Unheated	Unheated
212	SK	Silcrete_Reflection_00212	E3.1.1A.5	1A	South Africa	4	Dorsal	E3	49.045	77.232	66.418	10.839	47.832	Training	Unheated	Unheated
214	SK	Silcrete_Reflection_00214	E3.1.1A.5	1A	South Africa	6	Ventral	E3	50.08	77.662	66.747	10.701	48.923	Training	Unheated	Unheated
215	SK	Silcrete_Reflection_00215	E3.1.1A.5	1A	South Africa	7	Ventral	E3	50.962	75.845	61.326	12.463	49.415	Training	Unheated	Unheated
216	SK	Silcrete_Reflection_00216	E3.1.1A.5	1A	South Africa	8	Ventral	E3	51.113	79.175	73.622	9.6	50.204	Training	Unheated	Unheated
217	SK	Silcrete_Reflection_00217	I14.2.16E.31	16B	South Africa	1	Dorsal	I14	37.417	82.422	83.408	4.934	37.09	Validation	Heated	Unheated
218	SK	Silcrete_Reflection_00218	I14.2.16E.31	16B	South Africa	2	Dorsal	I14	31.591	80.995	51.287	4.944	31.202	Validation	Heated	Unheated
219	SK	Silcrete_Reflection_00219	I14.2.16E.31	16B	South Africa	3	Dorsal	I14	37.199	80.973	74.257	5.836	36.739	Validation	Heated	Heated
220	SK	Silcrete_Reflection_00220	I14.2.16E.31	16B	South Africa	4	Dorsal	I14	30.032	79.371	54.716	5.54	29.517	Validation	Heated	Heated
221	SK	Silcrete_Reflection_00221	I14.2.16E.31	16B	South Africa	5	Ventral	I14	30.588	76.159	48.41	7.317	29.7	Validation	Heated	Heated
222	SK	Silcrete_Reflection_00222	I14.2.16E.31	16B	South Africa	6	Ventral	I14	39.744	80.802	70.679	6.353	39.233	Validation	Heated	Unheated
223	SK	Silcrete_Reflection_00223	I14.2.16E.31	16B	South Africa	7	Ventral	I14	53.647	75.397	76.731	13.525	51.914	Validation	Heated	Unheated
224	SK	Silcrete_Reflection_00224	I14.2.16E.31	16B	South Africa	8	Ventral	I14	39.184	81.97	63.806	5.474	38.8	Validation	Heated	Unheated
225	SK	Silcrete_Reflection_00225	I14.2.16E.6	16B	South Africa	1	Dorsal	I14	40.247	78.025	66.338	8.351	39.371	Test	Heated	Heated
226	SK	Silcrete_Reflection_00226	I14.2.16E.6	16B	South Africa	2	Dorsal	I14	32.408	81.337	59.427	4.881	32.039	Test	Heated	Heated
227	SK	Silcrete_Reflection_00227	I14.2.16E.6	16B	South Africa	3	Dorsal	I14	38.658	76.667	61.117	8.915	37.616	Test	Heated	Heated
228	SK	Silcrete_Reflection_00228	I14.2.16E.6	16B	South Africa	4	Dorsal	I14	33.189	79.639	55.124	5.969	32.648	Test	Heated	Heated
229	SK	Silcrete_Reflection_00229	I14.2.16E.6	16B	South Africa	5	Ventral	I14	35.4	80.548	63.433	5.813	34.919	Test	Heated	Heated
230	SK	Silcrete_Reflection_00230	I14.2.16E.6	16B	South Africa	6	Ventral	I14	40.436	82.516	83.647	5.267	40.091	Test	Heated	Unheated
231	SK	Silcrete_Reflection_00231	I14.2.16E.6	16B	South Africa	7	Ventral	I14	43.258	83.28	69.311	5.062	42.961	Test	Heated	Unheated
232	SK	Silcrete_Reflection_00232	I14.2.16E.6	16B	South Africa	8	Ventral	I14	36.187	78.3	65.135	7.338	35.436	Test	Heated	Heated
233	SK	Silcrete_Reflection_00233	E3.1.6B.21	6B	South Africa	1	Dorsal	E3	48.76	63.597	70.478	21.683	43.674	Training	Unheated	Unheated
234	SK	Silcrete_Reflection_00234	E3.1.6B.21	6B	South Africa	2	Dorsal	E3	47.79	60.169	63.267	23.773	41.458	Training	Unheated	Heated
235	SK	Silcrete_Reflection_00235	E3.1.6B.21	6B	South Africa	3	Dorsal	E3	50.377	61.54	59.277	24.007	44.289	Training	Unheated	Heated
236	SK	Silcrete_Reflection_00236	E3.1.6B.21	6B	South Africa	4	Dorsal	E3	45.845	64.709	63.043	19.586	41.45	Training	Unheated	Unheated
237	SK	Silcrete_Reflection_00237	E3.1.6B.21	6B	South Africa	5	Ventral	E3	41.536	63.115	51.885	18.783	37.047	Training	Unheated	Heated
238	SK	Silcrete_Reflection_00238	E3.1.6B.21	6B	South Africa	6	Ventral	E3	54.347	59.536	66.923	27.554	46.845	Training	Unheated	Unheated
239	SK	Silcrete_Reflection_00239	E3.1.6B.21	6B	South Africa	7	Ventral	E3	54.475	62.455	72.72	25.192	48.301	OUTLIER	Unheated
240	SK	Silcrete_Reflection_00240	E3.1.6B.21	6B	South Africa	8	Ventral	E3	43.048	59.831	47.988	21.634	37.217	Training	Unheated	Heated
241	JM	Silcrete_Reflection_00241	E3.1.5N.7	5N	South Africa	1	Dorsal	E3	32.481	84.46	69.959	3.135	32.329	Training	Unheated	Unheated
242	JM	Silcrete_Reflection_00242	E3.1.5N.7	5N	South Africa	2	Dorsal	E3	28.392	84.803	63.784	2.572	28.275	Training	Unheated	Heated
243	JM	Silcrete_Reflection_00243	E3.1.5N.7	5N	South Africa	3	Dorsal	E3	30.475	84.238	65.826	3.059	30.321	Training	Unheated	Unheated
244	JM	Silcrete_Reflection_00244	E3.1.5N.7	5N	South Africa	4	Dorsal	E3	32.271	82.526	64.015	4.198	31.996	Training	Unheated	Heated
245	JM	Silcrete_Reflection_00245	E3.1.5N.7	5N	South Africa	5	Ventral	E3	29.48	84.823	65.764	2.66	29.36	Training	Unheated	Heated
246	JM	Silcrete_Reflection_00246	E3.1.5N.7	5N	South Africa	6	Ventral	E3	39.567	83.836	81.138	4.249	39.339	Training	Unheated	Unheated
247	JM	Silcrete_Reflection_00247	E3.1.5N.7	5N	South Africa	7	Ventral	E3	29.404	83.048	58.306	3.559	29.188	Training	Unheated	Heated
248	JM	Silcrete_Reflection_00248	E3.1.5N.7	5N	South Africa	8	Ventral	E3	32.175	84.248	77.159	3.225	32.013	Training	Unheated	Unheated
249	ET	Silcrete_Reflection_00249	E3.1.5N.23	5N	South Africa	1	Dorsal	E3	28.619	84.201	62.388	2.891	28.472	Training	Unheated	Unheated
250	ET	Silcrete_Reflection_00250	E3.1.5N.23	5N	South Africa	2	Dorsal	E3	26.771	84.031	55.128	2.784	26.626	Training	Unheated	Heated
251	ET	Silcrete_Reflection_00251	E3.1.5N.23	5N	South Africa	3	Dorsal	E3	29.714	85.397	70.62	2.385	29.618	Training	Unheated	Unheated
252	ET	Silcrete_Reflection_00252	E3.1.5N.23	5N	South Africa	4	Dorsal	E3	32.359	84.941	70.797	2.853	32.233	Training	Unheated	Unheated
253	ET	Silcrete_Reflection_00253	E3.1.5N.23	5N	South Africa	5	Ventral	E3	31.938	85.284	75.937	2.626	31.83	Training	Unheated	Unheated
254	ET	Silcrete_Reflection_00254	E3.1.5N.23	5N	South Africa	6	Ventral	E3	33.991	85.199	73.578	2.845	33.872	Training	Unheated	Unheated
255	ET	Silcrete_Reflection_00255	E3.1.5N.23	5N	South Africa	7	Ventral	E3	41.369	83.369	77.536	4.777	41.093	Training	Unheated	Unheated
256	ET	Silcrete_Reflection_00256	E3.1.5N.23	5N	South Africa	8	Ventral	E3	26.821	84.808	61.113	2.427	26.711	Training	Unheated	Unheated
257	ET	Silcrete_Reflection_00257	E3.1.1B.2	1B	South Africa	1	Dorsal	E3	31.814	48.261	30.146	21.18	23.739	OUTLIER	Heated
258	ET	Silcrete_Reflection_00258	E3.1.1B.2	1B	South Africa	2	Dorsal	E3	27.464	51.07	30.277	17.258	21.365	Training	Heated	Heated
259	ET	Silcrete_Reflection_00259	E3.1.1B.2	1B	South Africa	3	Dorsal	E3	21.929	54.73	25.095	12.663	17.904	OUTLIER	Heated
260	ET	Silcrete_Reflection_00260	E3.1.1B.2	1B	South Africa	4	Dorsal	E3	38.67	56.508	38.869	21.339	32.249	Training	Heated	Heated
261	ET	Silcrete_Reflection_00261	E3.1.1B.2	1B	South Africa	5	Ventral	E3	36.781	44.658	35.283	26.163	25.852	OUTLIER	Heated
262	ET	Silcrete_Reflection_00262	E3.1.1B.2	1B	South Africa	6	Ventral	E3	36.559	46.469	32.022	25.18	26.505	OUTLIER	Heated
263	ET	Silcrete_Reflection_00263	E3.1.1B.2	1B	South Africa	7	Ventral	E3	37.422	56.809	38.748	20.486	31.316	Training	Heated	Heated
264	ET	Silcrete_Reflection_00264	E3.1.1B.2	1B	South Africa	8	Ventral	E3	38.285	55.616	41.447	21.621	31.595	Training	Heated	Heated
265	ET	Silcrete_Reflection_00265	E3.1.1B.10	1B	South Africa	1	Dorsal	E3	34.998	53.773	42.023	20.684	28.233	Training	Heated	Heated
266	ET	Silcrete_Reflection_00266	E3.1.1B.10	1B	South Africa	2	Dorsal	E3	31.275	48.624	42.688	20.673	23.468	Training	Heated	Heated
267	ET	Silcrete_Reflection_00267	E3.1.1B.10	1B	South Africa	3	Dorsal	E3	29.582	55.667	32.377	16.684	24.428	Training	Heated	Heated
268	ET	Silcrete_Reflection_00268	E3.1.1B.10	1B	South Africa	4	Dorsal	E3	32.731	58.766	39.521	16.972	27.986	Training	Heated	Heated
269	ET	Silcrete_Reflection_00269	E3.1.1B.10	1B	South Africa	5	Ventral	E3	34.744	54.965	39.976	19.945	28.448	Training	Heated	Heated
270	ET	Silcrete_Reflection_00270	E3.1.1B.10	1B	South Africa	6	Ventral	E3	39.935	55.568	41.589	22.58	32.938	Training	Heated	Heated
271	ET	Silcrete_Reflection_00271	E3.1.1B.10	1B	South Africa	7	Ventral	E3	31.245	51.768	42.484	19.336	24.543	Training	Heated	Heated
272	ET	Silcrete_Reflection_00272	E3.1.1B.10	1B	South Africa	8	Ventral	E3	33.238	51.131	43.273	20.859	25.879	Training	Heated	Heated
273	ET	Silcrete_Reflection_00273	E3.1.5N.43	5N	South Africa	1	Dorsal	E3	30.419	84.228	61.922	3.059	30.264	Training	Unheated	Unheated
274	ET	Silcrete_Reflection_00274	E3.1.5N.43	5N	South Africa	2	Dorsal	E3	33.455	84.972	75.91	2.932	33.326	Training	Unheated	Unheated
275	ET	Silcrete_Reflection_00275	E3.1.5N.43	5N	South Africa	3	Dorsal	E3	33.026	84.459	72.741	3.189	32.872	Training	Unheated	Unheated
276	ET	Silcrete_Reflection_00276	E3.1.5N.43	5N	South Africa	4	Dorsal	E3	33.228	86.084	80.382	2.269	33.15	Training	Unheated	Unheated
277	ET	Silcrete_Reflection_00277	E3.1.5N.43	5N	South Africa	5	Ventral	E3	35.315	83.021	68.147	4.291	35.053	Training	Unheated	Unheated
278	ET	Silcrete_Reflection_00278	E3.1.5N.43	5N	South Africa	6	Ventral	E3	36.822	82.707	69.552	4.674	36.524	Training	Unheated	Heated
279	ET	Silcrete_Reflection_00279	E3.1.5N.43	5N	South Africa	7	Ventral	E3	33.548	86.176	74.384	2.237	33.473	Training	Unheated	Unheated
280	ET	Silcrete_Reflection_00280	E3.1.5N.43	5N	South Africa	8	Ventral	E3	30.904	85.865	70.849	2.228	30.823	Training	Unheated	Unheated
281	SK	Silcrete_Reflection_00281	D9.1.12C.11	12C	South Africa	1	Dorsal	D9	29.24	88.006	72.303	1.018	29.223	Training	Unheated	Unheated
282	SK	Silcrete_Reflection_00282	D9.1.12C.11	12C	South Africa	2	Dorsal	D9	24.893	86.641	58.85	1.459	24.85	Training	Unheated	Unheated
283	SK	Silcrete_Reflection_00283	D9.1.12C.11	12C	South Africa	3	Dorsal	D9	26.759	87.208	63.288	1.303	26.727	Training	Unheated	Unheated
284	SK	Silcrete_Reflection_00284	D9.1.12C.11	12C	South Africa	4	Dorsal	D9	28.514	86.832	66.507	1.576	28.47	Training	Unheated	Unheated
285	SK	Silcrete_Reflection_00285	D9.1.12C.11	12C	South Africa	5	Ventral	D9	29.146	87.42	72.188	1.312	29.117	Training	Unheated	Unheated
286	SK	Silcrete_Reflection_00286	D9.1.12C.11	12C	South Africa	6	Ventral	D9	24.783	85.827	56.932	1.803	24.717	Training	Unheated	Unheated
287	SK	Silcrete_Reflection_00287	D9.1.12C.11	12C	South Africa	7	Ventral	D9	25.076	86.683	55.726	1.451	25.034	Training	Unheated	Heated
288	SK	Silcrete_Reflection_00288	D9.1.12C.11	12C	South Africa	8	Ventral	D9	34.337	87.894	88.04	1.262	34.314	Training	Unheated	Unheated
289	SK	Silcrete_Reflection_00289	D9.1.12C.30	12C	South Africa	1	Dorsal	D9	37.935	85.745	78.861	2.815	37.83	Training	Unheated	Unheated
290	SK	Silcrete_Reflection_00290	D9.1.12C.30	12C	South Africa	2	Dorsal	D9	31.301	87.864	76.638	1.167	31.279	Training	Unheated	Unheated
291	SK	Silcrete_Reflection_00291	D9.1.12C.30	12C	South Africa	3	Dorsal	D9	33.408	88.45	83.121	0.903	33.396	Training	Unheated	Unheated
292	SK	Silcrete_Reflection_00292	D9.1.12C.30	12C	South Africa	4	Dorsal	D9	26.031	87.636	62.735	1.074	26.009	Training	Unheated	Unheated
293	SK	Silcrete_Reflection_00293	D9.1.12C.30	12C	South Africa	5	Ventral	D9	30.257	87.5	70.636	1.32	30.229	Training	Unheated	Unheated
294	SK	Silcrete_Reflection_00294	D9.1.12C.30	12C	South Africa	6	Ventral	D9	33.773	87.31	78.63	1.585	33.735	Training	Unheated	Unheated
295	SK	Silcrete_Reflection_00295	D9.1.12C.30	12C	South Africa	7	Ventral	D9	31.237	88.319	76.263	0.917	31.224	Training	Unheated	Unheated
296	SK	Silcrete_Reflection_00296	D9.1.12C.30	12C	South Africa	8	Ventral	D9	30.16	88.914	73.687	0.571	30.154	Training	Unheated	Unheated
297	SK	Silcrete_Reflection_00297	D9.1.10B.6A	10B	South Africa	1	Dorsal	D9	30.426	72.351	55.724	9.225	28.994	Training	Heated	Heated
298	SK	Silcrete_Reflection_00298	D9.1.10B.6A	10B	South Africa	2	Dorsal	D9	42.409	59.329	52.458	21.633	36.476	Training	Heated	Heated
299	SK	Silcrete_Reflection_00299	D9.1.10B.6A	10B	South Africa	3	Dorsal	D9	32.187	60.061	42.018	16.064	27.891	Training	Heated	Heated
300	SK	Silcrete_Reflection_00300	D9.1.10B.6A	10B	South Africa	4	Dorsal	D9	35.003	70.483	57.275	11.694	32.992	Training	Heated	Heated
301	SK	Silcrete_Reflection_00301	D9.1.10B.6A	10B	South Africa	5	Ventral	D9	34.43	66.682	51.402	13.629	31.618	Training	Heated	Heated
302	SK	Silcrete_Reflection_00302	D9.1.10B.6A	10B	South Africa	6	Ventral	D9	35.89	67.278	53.406	13.863	33.104	Training	Heated	Heated
303	SK	Silcrete_Reflection_00303	D9.1.10B.6A	10B	South Africa	7	Ventral	D9	29.192	64.42	46.312	12.605	26.331	Training	Heated	Heated
304	SK	Silcrete_Reflection_00304	D9.1.10B.6A	10B	South Africa	8	Ventral	D9	40.901	70.713	63.348	13.51	38.605	Training	Heated	Heated
305	SK	Silcrete_Reflection_00305	D9.1.10B.6B	10B	South Africa	1	Dorsal	D9	33.828	65.305	47.706	14.133	30.734	Training	Heated	Heated
306	SK	Silcrete_Reflection_00306	D9.1.10B.6B	10B	South Africa	2	Dorsal	D9	39.029	68.356	57.405	14.396	36.278	Training	Heated	Heated
307	SK	Silcrete_Reflection_00307	D9.1.10B.6B	10B	South Africa	3	Dorsal	D9	36.067	67.2	52.343	13.977	33.249	Training	Heated	Heated
308	SK	Silcrete_Reflection_00308	D9.1.10B.6B	10B	South Africa	4	Dorsal	D9	35.552	66.408	49.784	14.228	32.58	Training	Heated	Heated
309	ET	Silcrete_Reflection_00309	D9.1.10B.6B	10B	South Africa	5	Ventral	D9	32.968	60.542	45.299	16.213	28.706	Training	Heated	Heated
310	ET	Silcrete_Reflection_00310	D9.1.10B.6B	10B	South Africa	6	Ventral	D9	34.65	64.887	49.098	14.706	31.375	Training	Heated	Heated
311	ET	Silcrete_Reflection_00311	D9.1.10B.6B	10B	South Africa	7	Ventral	D9	38.455	65.947	58.89	15.673	35.116	Training	Heated	Heated
312	ET	Silcrete_Reflection_00312	D9.1.10B.6B	10B	South Africa	8	Ventral	D9	33.195	65.801	51.639	13.607	30.278	Training	Heated	Heated
313	ET	Silcrete_Reflection_00313	D9.1.10B.6B	10B	South Africa	1	Dorsal	D9	39.211	61.244	52.395	18.864	34.375	Training	Heated	Heated
314	ET	Silcrete_Reflection_00314	D9.1.10B.6B	10B	South Africa	2	Dorsal	D9	39.863	69.649	61.679	13.863	37.374	Training	Heated	Heated
315	ET	Silcrete_Reflection_00315	D9.1.10B.6B	10B	South Africa	3	Dorsal	D9	34.668	63.771	48.796	15.322	31.098	Training	Heated	Heated
316	ET	Silcrete_Reflection_00316	D9.1.10B.6B	10B	South Africa	4	Dorsal	D9	31.789	64.701	43.934	13.585	28.74	Training	Heated	Heated
317	ET	Silcrete_Reflection_00317	D9.1.10B.6A	10B	South Africa	1	Ventral	D9	26.834	69.523	46.046	9.388	25.139	Training	Heated	Heated
318	ET	Silcrete_Reflection_00318	D9.1.10B.6A	10B	South Africa	2	Ventral	D9	30.198	79.067	58.023	5.727	29.65	Training	Heated	Heated
319	ET	Silcrete_Reflection_00319	D9.1.10B.6A	10B	South Africa	3	Ventral	D9	29.06	62.685	42.431	13.335	25.82	Training	Heated	Heated
320	ET	Silcrete_Reflection_00320	D9.1.10B.6A	10B	South Africa	4	Ventral	D9	34.734	65.067	52.61	14.643	31.497	Training	Heated	Heated
321	ET	Silcrete_Reflection_00321	D9.1.10B.6A	10B	South Africa	5	Dorsal	D9	37.068	64.908	58.336	15.719	33.57	Training	Heated	Heated
322	ET	Silcrete_Reflection_00322	D9.1.10B.6A	10B	South Africa	6	Dorsal	D9	32.546	68.749	50.181	11.796	30.333	Training	Heated	Heated
323	ET	Silcrete_Reflection_00323	D9.1.10B.6A	10B	South Africa	7	Dorsal	D9	29.871	61.188	41.402	14.396	26.173	Training	Heated	Heated
324	ET	Silcrete_Reflection_00324	D9.1.10B.6A	10B	South Africa	8	Dorsal	D9	32.366	65.88	52.383	13.226	29.54	Training	Heated	Heated
345	ET	Silcrete_Reflection_00345	E3.1.5O.11	5O	South Africa	1	Dorsal	E3	32.284	86.582	76.544	1.925	32.226	Training	Unheated	Unheated
346	ET	Silcrete_Reflection_00346	E3.1.5O.11	5O	South Africa	2	Dorsal	E3	31.014	86.409	73.848	1.943	30.953	Training	Unheated	Unheated
347	ET	Silcrete_Reflection_00347	E3.1.5O.11	5O	South Africa	3	Dorsal	E3	31.302	86.877	75.924	1.705	31.256	Training	Unheated	Unheated
348	ET	Silcrete_Reflection_00348	E3.1.5O.11	5O	South Africa	4	Dorsal	E3	31.486	87.035	78.755	1.629	31.444	Training	Unheated	Unheated
349	ET	Silcrete_Reflection_00349	E3.1.5O.11	5O	South Africa	5	Ventral	E3	31.436	86.678	76.267	1.821	31.383	Training	Unheated	Unheated
350	ET	Silcrete_Reflection_00350	E3.1.5O.11	5O	South Africa	6	Ventral	E3	35.098	86.183	85.447	2.337	35.02	Training	Unheated	Unheated
351	ET	Silcrete_Reflection_00351	E3.1.5O.11	5O	South Africa	7	Ventral	E3	33.262	87.764	87.737	1.298	33.236	Training	Unheated	Unheated
352	ET	Silcrete_Reflection_00352	E3.1.5O.11	5O	South Africa	8	Ventral	E3	32.911	86.021	74.721	2.284	32.831	Training	Unheated	Unheated
353	ET	Silcrete_Reflection_00353	E3.1.5O.6	5O	South Africa	1	Dorsal	E3	29.593	86.492	71.416	1.811	29.537	Training	Unheated	Unheated
354	ET	Silcrete_Reflection_00354	E3.1.5O.6	5O	South Africa	2	Dorsal	E3	29.788	86.935	72.271	1.593	29.745	Training	Unheated	Unheated
355	ET	Silcrete_Reflection_00355	E3.1.5O.6	5O	South Africa	3	Dorsal	E3	35.142	83.252	67.933	4.129	34.899	Training	Unheated	Unheated
356	ET	Silcrete_Reflection_00356	E3.1.5O.6	5O	South Africa	4	Dorsal	E3	28.433	86.536	68.065	1.718	28.381	Training	Unheated	Unheated
357	ET	Silcrete_Reflection_00357	E3.1.5O.6	5O	South Africa	5	Ventral	E3	32.588	87.078	80.108	1.661	32.546	Training	Unheated	Unheated
358	ET	Silcrete_Reflection_00358	E3.1.5O.6	5O	South Africa	6	Ventral	E3	29.98	87.588	75.492	1.262	29.954	Training	Unheated	Unheated
359	ET	Silcrete_Reflection_00359	E3.1.5O.6	5O	South Africa	7	Ventral	E3	29.104	87.135	74.057	1.455	29.068	Training	Unheated	Unheated
360	ET	Silcrete_Reflection_00360	E3.1.5O.6	5O	South Africa	8	Ventral	E3	30.772	87.208	77.034	1.499	30.736	Training	Unheated	Unheated
361	SK	Silcrete_Reflection_00361	D9.1.10B.6B	10B	South Africa	5	Ventral	D9	30.555	60.397	35.775	15.094	26.566	Training	Heated	Heated
362	SK	Silcrete_Reflection_00362	D9.1.10B.6B	10B	South Africa	6	Ventral	D9	33.615	64.209	51.638	14.625	30.266	Training	Heated	Heated
363	SK	Silcrete_Reflection_00363	D9.1.10B.6B	10B	South Africa	7	Ventral	D9	31.895	65.603	51.93	13.174	29.046	Training	Heated	Heated
364	SK	Silcrete_Reflection_00364	D9.1.10B.6B	10B	South Africa	8	Ventral	D9	33.828	64.444	49.51	14.593	30.518	Training	Heated	Heated
375	SK	Silcrete_Reflection_00375	D9.1.10B.18	10B	South Africa	1	Dorsal	D9	37.496	62.018	50.015	17.593	33.113	Training	Heated	Heated
376	SK	Silcrete_Reflection_00376	D9.1.10B.18	10B	South Africa	2	Dorsal	D9	25.79	68.67	42.986	9.381	24.023	Training	Heated	Heated
377	SK	Silcrete_Reflection_00377	D9.1.10B.18	10B	South Africa	3	Dorsal	D9	32.798	64.861	46.927	13.933	29.691	Training	Heated	Heated
378	SK	Silcrete_Reflection_00378	D9.1.10B.18	10B	South Africa	4	Dorsal	D9	33.574	63.166	50.036	15.155	29.958	Training	Heated	Heated
379	SK	Silcrete_Reflection_00379	D9.1.10B.18	10B	South Africa	5	Ventral	D9	29.139	68.116	41.62	10.861	27.039	Training	Heated	Heated
380	SK	Silcrete_Reflection_00380	D9.1.10B.18	10B	South Africa	6	Ventral	D9	27.242	70.49	50.127	9.098	25.678	Training	Heated	Heated
381	SK	Silcrete_Reflection_00381	D9.1.10B.18	10B	South Africa	7	Ventral	D9	29.295	74.261	51.051	7.946	28.196	Training	Heated	Heated
382	SK	Silcrete_Reflection_00382	D9.1.10B.18	10B	South Africa	8	Ventral	D9	24.991	67.144	34.62	9.707	23.029	OUTLIER	Heated
383	SK	Silcrete_Reflection_00383	E3.1.5P.23	5P	South Africa	1	Dorsal	E3	28.797	78.873	53.038	5.557	28.256	Training	Heated	Heated
384	SK	Silcrete_Reflection_00384	E3.1.5P.23	5P	South Africa	2	Dorsal	E3	29.573	77.584	54.884	6.359	28.881	Training	Heated	Heated
385	SK	Silcrete_Reflection_00385	E3.1.5P.23	5P	South Africa	3	Dorsal	E3	35.386	81.31	74.138	5.347	34.98	Training	Heated	Heated
386	SK	Silcrete_Reflection_00386	E3.1.5P.23	5P	South Africa	4	Dorsal	E3	31.13	79.78	61.096	5.523	30.636	Training	Heated	Heated
387	SK	Silcrete_Reflection_00387	E3.1.5P.23	5P	South Africa	5	Ventral	E3	32.438	77.03	58.891	7.281	31.61	Training	Heated	Heated
388	SK	Silcrete_Reflection_00388	E3.1.5P.23	5P	South Africa	6	Ventral	E3	28.798	80.779	59.93	4.615	28.426	Training	Heated	Heated
389	SK	Silcrete_Reflection_00389	E3.1.5P.23	5P	South Africa	7	Ventral	E3	32.014	79.494	64.714	5.837	31.477	Training	Heated	Heated
390	SK	Silcrete_Reflection_00390	E3.1.5P.23	5P	South Africa	8	Ventral	E3	33.566	79.16	64.161	6.313	32.967	Training	Heated	Heated
391	SK	Silcrete_Reflection_00391	E3.1.5N.25	5N	South Africa	1	Dorsal	E3	38.649	83.581	84.05	4.321	38.407	Training	Unheated	Unheated
392	SK	Silcrete_Reflection_00392	E3.1.5N.25	5N	South Africa	2	Dorsal	E3	36.842	85.6	78.771	2.826	36.733	Training	Unheated	Unheated
393	SK	Silcrete_Reflection_00393	E3.1.5N.25	5N	South Africa	3	Dorsal	E3	25.461	84.202	45.929	2.572	25.331	Training	Unheated	Heated
394	SK	Silcrete_Reflection_00394	E3.1.5N.25	5N	South Africa	4	Dorsal	E3	38.538	85.558	79.274	2.985	38.422	Training	Unheated	Unheated
395	SK	Silcrete_Reflection_00395	E3.1.5N.25	5N	South Africa	5	Ventral	E3	42.042	84.618	78.541	3.943	41.856	Training	Unheated	Unheated
396	SK	Silcrete_Reflection_00396	E3.1.5N.25	5N	South Africa	6	Ventral	E3	35.515	84.701	74.755	3.28	35.363	Training	Unheated	Unheated
397	SK	Silcrete_Reflection_00397	E3.1.5N.25	5N	South Africa	7	Ventral	E3	37.95	85.052	74.298	3.273	37.809	Training	Unheated	Unheated
398	SK	Silcrete_Reflection_00398	E3.1.5N.25	5N	South Africa	8	Ventral	E3	34.287	85.855	75.088	2.478	34.197	Training	Unheated	Unheated
399	SK	Silcrete_Reflection_00399	E3.1.6C.27	6C	South Africa	1	Dorsal	E3	50.511	57.312	59.133	27.279	42.511	Training	Heated	Unheated
400	SK	Silcrete_Reflection_00400	E3.1.6C.27	6C	South Africa	2	Dorsal	E3	46.733	61.198	59.233	22.515	40.952	Training	Heated	Heated
401	SK	Silcrete_Reflection_00401	E3.1.6C.27	6C	South Africa	3	Dorsal	E3	50.374	63.44	66.914	22.524	45.058	Training	Heated	Unheated
402	SK	Silcrete_Reflection_00402	E3.1.6C.27	6C	South Africa	4	Dorsal	E3	48.016	56.82	54.282	26.278	40.187	Training	Heated	Heated
403	SK	Silcrete_Reflection_00403	E3.1.6C.27	6C	South Africa	5	Ventral	E3	46.682	60.536	55.987	22.962	40.644	Training	Heated	Heated
404	SK	Silcrete_Reflection_00404	E3.1.6C.27	6C	South Africa	6	Ventral	E3	47.341	60.553	58.822	23.274	41.225	Training	Heated	Heated
405	SK	Silcrete_Reflection_00405	E3.1.6C.27	6C	South Africa	7	Ventral	E3	48.762	58.94	58.767	25.158	41.771	Training	Heated	Heated
406	SK	Silcrete_Reflection_00406	E3.1.6C.27	6C	South Africa	8	Ventral	E3	48.891	63.988	70.179	21.441	43.938	Training	Heated	Unheated
407	SK	Silcrete_Reflection_00407	E3.1.5P.14	5P	South Africa	1	Dorsal	E3	14.654	67.095	39.888	5.703	13.499	Training	Heated	Heated
408	SK	Silcrete_Reflection_00408	E3.1.5P.14	5P	South Africa	2	Dorsal	E3	19.242	66.584	55.494	7.647	17.657	Training	Heated	Heated
409	SK	Silcrete_Reflection_00409	E3.1.5P.14	5P	South Africa	3	Dorsal	E3	18.318	64.336	56.94	7.933	16.511	Training	Heated	Heated
410	SK	Silcrete_Reflection_00410	E3.1.5P.14	5P	South Africa	4	Dorsal	E3	19.082	64.398	51.547	8.245	17.208	Training	Heated	Heated
411	SK	Silcrete_Reflection_00411	E3.1.5P.14	5P	South Africa	5	Ventral	E3	22.164	64.018	59.095	9.71	19.924	Training	Heated	Heated
412	SK	Silcrete_Reflection_00412	E3.1.5P.14	5P	South Africa	6	Ventral	E3	19.167	63.335	55.066	8.602	17.129	Training	Heated	Heated
413	SK	Silcrete_Reflection_00413	E3.1.5P.14	5P	South Africa	7	Ventral	E3	19.188	67.568	56.402	7.322	17.736	Training	Heated	Heated
414	SK	Silcrete_Reflection_00414	E3.1.5P.14	5P	South Africa	8	Ventral	E3	20.036	68.713	59.313	7.274	18.669	Training	Heated	Heated
415	SK	Silcrete_Reflection_00415	E3.1.5O.28	5O	South Africa	1	Dorsal	E3	11.833	84.307	52.937	1.174	11.775	Validation	Unheated	Unheated
416	SK	Silcrete_Reflection_00416	E3.1.5O.28	5O	South Africa	2	Dorsal	E3	11.21	88.195	67.25	0.353	11.204	Validation	Unheated	Unheated
417	SK	Silcrete_Reflection_00417	E3.1.5O.28	5O	South Africa	3	Dorsal	E3	8.936	86.036	53.687	0.618	8.914	Validation	Unheated	Unheated
418	SK	Silcrete_Reflection_00418	E3.1.5O.28	5O	South Africa	4	Dorsal	E3	9.061	84.807	57.732	0.82	9.024	Validation	Unheated	Unheated
419	SK	Silcrete_Reflection_00419	E3.1.5O.28	5O	South Africa	5	Ventral	E3	10.869	84.354	54.47	1.069	10.817	Validation	Unheated	Unheated
420	SK	Silcrete_Reflection_00420	E3.1.5O.28	5O	South Africa	6	Ventral	E3	10.943	87.186	61.535	0.537	10.93	Validation	Unheated	Unheated
421	SK	Silcrete_Reflection_00421	E3.1.5O.28	5O	South Africa	7	Ventral	E3	10.742	86.274	59.937	0.698	10.719	Validation	Unheated	Unheated
422	SK	Silcrete_Reflection_00422	E3.1.5O.28	5O	South Africa	8	Ventral	E3	10.879	85.483	66.56	0.857	10.845	Validation	Unheated	Unheated
423	SK	Silcrete_Reflection_00423	E3.1.6B.10	6B	South Africa	1	Dorsal	E3	31.462	44.062	47.764	22.608	21.88	Training	Unheated	Unheated
424	SK	Silcrete_Reflection_00424	E3.1.6B.10	6B	South Africa	2	Dorsal	E3	30.748	44.159	48.434	22.059	21.421	Training	Unheated	Unheated
425	SK	Silcrete_Reflection_00425	E3.1.6B.10	6B	South Africa	3	Dorsal	E3	34.477	44.241	53.871	24.699	24.054	OUTLIER	Unheated
426	SK	Silcrete_Reflection_00426	E3.1.6B.10	6B	South Africa	4	Dorsal	E3	31.959	46.189	53.132	22.125	23.063	Training	Unheated	Unheated
427	SK	Silcrete_Reflection_00427	E3.1.6B.10	6B	South Africa	5	Ventral	E3	27.815	47.298	49.845	18.864	20.441	Training	Unheated	Unheated
428	SK	Silcrete_Reflection_00428	E3.1.6B.10	6B	South Africa	6	Ventral	E3	21.521	45.557	38.48	15.069	15.365	OUTLIER	Unheated
429	SK	Silcrete_Reflection_00429	E3.1.6B.10	6B	South Africa	7	Ventral	E3	30.68	44.556	48.007	21.862	21.525	Training	Unheated	Unheated
430	SK	Silcrete_Reflection_00430	E3.1.6B.10	6B	South Africa	8	Ventral	E3	28.766	46.123	51.007	19.938	20.735	Training	Unheated	Unheated
431	SK	Silcrete_Reflection_00431	E3.1.1B.24	1B	South Africa	1	Dorsal	E3	25.077	39.719	45.689	19.288	16.025	OUTLIER	Heated
432	SK	Silcrete_Reflection_00432	E3.1.1B.24	1B	South Africa	2	Dorsal	E3	19.871	38.295	32.373	15.595	12.314	Training	Heated	Heated
433	SK	Silcrete_Reflection_00433	E3.1.1B.24	1B	South Africa	3	Dorsal	E3	17.208	39.067	27.046	13.36	10.845	Training	Heated	Heated
434	SK	Silcrete_Reflection_00434	E3.1.1B.24	1B	South Africa	4	Dorsal	E3	16.781	38.314	23.367	13.166	10.403	Training	Heated	Heated
435	SK	Silcrete_Reflection_00435	E3.1.1B.24	1B	South Africa	5	Ventral	E3	21.173	32.915	32.798	17.774	11.505	Training	Heated	Heated
436	SK	Silcrete_Reflection_00436	E3.1.1B.24	1B	South Africa	6	Ventral	E3	20.526	38.73	34.669	16.012	12.842	Training	Heated	Heated
437	SK	Silcrete_Reflection_00437	E3.1.1B.24	1B	South Africa	7	Ventral	E3	18.836	39.765	27.747	14.478	12.048	Training	Heated	Heated
438	SK	Silcrete_Reflection_00438	E3.1.1B.24	1B	South Africa	8	Ventral	E3	20.51	34.853	32.468	16.831	11.721	Training	Heated	Heated
439	ET	Silcrete_Reflection_00439	E3.1.6C.5	6C	South Africa	1	Dorsal	E3	46.739	55.677	49.098	26.354	38.6	Test	Heated	Heated
440	ET	Silcrete_Reflection_00440	E3.1.6C.5	6C	South Africa	2	Dorsal	E3	37.234	56.848	37.194	20.362	31.173	Test	Heated	Heated
441	ET	Silcrete_Reflection_00441	E3.1.6C.5	6C	South Africa	3	Dorsal	E3	42.547	60.395	53.925	21.019	36.992	Test	Heated	Heated
442	ET	Silcrete_Reflection_00442	E3.1.6C.5	6C	South Africa	4	Dorsal	E3	46.497	59.773	63.542	23.408	40.175	Test	Heated	Unheated
443	ET	Silcrete_Reflection_00443	E3.1.6C.5	6C	South Africa	5	Ventral	E3	48.746	53.9	50.281	28.721	39.387	Test	Heated	Unheated
444	ET	Silcrete_Reflection_00444	E3.1.6C.5	6C	South Africa	6	Ventral	E3	40.186	59.198	41.294	20.578	34.517	Test	Heated	Heated
445	ET	Silcrete_Reflection_00445	E3.1.6C.5	6C	South Africa	7	Ventral	E3	48.791	55.623	50.104	27.549	40.269	Test	Heated	Heated
446	ET	Silcrete_Reflection_00446	E3.1.6C.5	6C	South Africa	8	Ventral	E3	40.394	63.917	61.546	17.76	36.28	Test	Heated	Heated
447	ET	Silcrete_Reflection_00447	E3.1.6B.2	6B	South Africa	1	Dorsal	E3	52.031	52.584	57.67	31.614	41.325	Training	Unheated	Unheated
448	ET	Silcrete_Reflection_00448	E3.1.6B.2	6B	South Africa	2	Dorsal	E3	44.991	52.962	48.956	27.101	35.914	Training	Unheated	Heated
449	ET	Silcrete_Reflection_00449	E3.1.6B.2	6B	South Africa	3	Dorsal	E3	49.493	53.177	53.722	29.664	39.619	Training	Unheated	Unheated
450	ET	Silcrete_Reflection_00450	E3.1.6B.2	6B	South Africa	4	Dorsal	E3	51.896	53.705	57.591	30.719	41.827	Training	Unheated	Unheated
451	ET	Silcrete_Reflection_00451	E3.1.6B.2	6B	South Africa	5	Ventral	E3	48.979	54.194	55.372	28.655	39.722	Training	Unheated	Unheated
452	ET	Silcrete_Reflection_00452	E3.1.6B.2	6B	South Africa	6	Ventral	E3	50.937	53.695	54.55	30.159	41.049	Training	Unheated	Unheated
453	ET	Silcrete_Reflection_00453	E3.1.6B.2	6B	South Africa	7	Ventral	E3	51.256	54.755	61.77	29.578	41.86	Training	Unheated	Unheated
454	ET	Silcrete_Reflection_00454	E3.1.6B.2	6B	South Africa	8	Ventral	E3	47.675	55.068	54.934	27.299	39.086	Training	Unheated	Unheated
455	ET	Silcrete_Reflection_00455	E3.1.6B.23	6B	South Africa	1	Dorsal	E3	44.466	64.657	68.314	19.033	40.186	OUTLIER	Unheated
456	ET	Silcrete_Reflection_00456	E3.1.6B.23	6B	South Africa	2	Dorsal	E3	51.895	55.775	63.238	29.188	42.909	Training	Unheated	Heated
457	ET	Silcrete_Reflection_00457	E3.1.6B.23	6B	South Africa	3	Dorsal	E3	52.372	62.783	79.215	23.953	46.573	OUTLIER	Unheated
458	ET	Silcrete_Reflection_00458	E3.1.6B.23	6B	South Africa	4	Dorsal	E3	50.098	62.99	75.83	22.752	44.634	Training	Unheated	Unheated
459	ET	Silcrete_Reflection_00459	E3.1.6B.23	6B	South Africa	5	Ventral	E3	50.013	59.823	67.883	25.14	43.235	Training	Unheated	Unheated
460	ET	Silcrete_Reflection_00460	E3.1.6B.23	6B	South Africa	6	Ventral	E3	47.16	62.37	61.853	21.871	41.782	Training	Unheated	Heated
461	ET	Silcrete_Reflection_00461	E3.1.6B.23	6B	South Africa	7	Ventral	E3	51.098	59.351	69.436	26.049	43.96	Training	Unheated	Unheated
462	ET	Silcrete_Reflection_00462	E3.1.6B.23	6B	South Africa	8	Ventral	E3	53.099	59.021	60.408	27.331	45.524	Training	Unheated	Heated
463	ET	Silcrete_Reflection_00463	E3.1.5P.47	5P	South Africa	1	Dorsal	E3	36.934	72.85	63.191	10.891	35.291	Training	Heated	Heated
464	ET	Silcrete_Reflection_00464	E3.1.5P.47	5P	South Africa	2	Dorsal	E3	37.284	76.604	66.342	8.638	36.269	Training	Heated	Heated
465	ET	Silcrete_Reflection_00465	E3.1.5P.47	5P	South Africa	3	Dorsal	E3	37.126	76.812	69.492	8.47	36.147	Training	Heated	Heated
466	ET	Silcrete_Reflection_00466	E3.1.5P.47	5P	South Africa	4	Dorsal	E3	44.572	71.954	71.902	13.807	42.379	Training	Heated	Heated
467	ET	Silcrete_Reflection_00467	E3.1.5P.47	5P	South Africa	5	Ventral	E3	33.654	75.346	61.5	8.513	32.559	Training	Heated	Heated
468	ET	Silcrete_Reflection_00468	E3.1.5P.47	5P	South Africa	6	Ventral	E3	34.694	76.544	62.883	8.073	33.742	Training	Heated	Heated
469	ET	Silcrete_Reflection_00469	E3.1.5P.47	5P	South Africa	7	Ventral	E3	42.052	75.855	70.449	10.276	40.777	Training	Heated	Heated
470	ET	Silcrete_Reflection_00470	E3.1.5P.47	5P	South Africa	8	Ventral	E3	36.646	80.483	77.031	6.059	36.141	Training	Heated	Heated
471	ET	Silcrete_Reflection_00471	E3.1.5N.19	5N	South Africa	1	Dorsal	E3	36.651	85.167	70.919	3.088	36.521	Training	Unheated	Unheated
472	ET	Silcrete_Reflection_00472	E3.1.5N.19	5N	South Africa	2	Dorsal	E3	34.275	85.349	69.305	2.779	34.162	Training	Unheated	Unheated
473	ET	Silcrete_Reflection_00473	E3.1.5N.19	5N	South Africa	3	Dorsal	E3	31.528	86.288	69.098	2.041	31.462	Training	Unheated	Unheated
474	ET	Silcrete_Reflection_00474	E3.1.5N.19	5N	South Africa	4	Dorsal	E3	31	86.074	63.559	2.123	30.927	Training	Unheated	Unheated
475	ET	Silcrete_Reflection_00475	E3.1.5N.19	5N	South Africa	5	Ventral	E3	36.334	86.302	75.991	2.343	36.259	Training	Unheated	Unheated
476	ET	Silcrete_Reflection_00476	E3.1.5N.19	5N	South Africa	6	Ventral	E3	33.641	87.156	74.943	1.669	33.599	Training	Unheated	Unheated
477	ET	Silcrete_Reflection_00477	E3.1.5N.19	5N	South Africa	7	Ventral	E3	35.213	87.342	80.649	1.633	35.175	Training	Unheated	Unheated
478	ET	Silcrete_Reflection_00478	E3.1.5N.19	5N	South Africa	8	Ventral	E3	38.514	85.427	74.475	3.071	38.391	Training	Unheated	Unheated
479	JM	Silcrete_Reflection_00479	D9.1.12C.6	12C	South Africa	1	Dorsal	D9	31.619	86.83	75.845	1.748	31.571	Training	Unheated	Unheated
480	JM	Silcrete_Reflection_00480	D9.1.12C.6	12C	South Africa	2	Dorsal	D9	25.564	86.952	60.347	1.359	25.528	Training	Unheated	Unheated
481	JM	Silcrete_Reflection_00481	D9.1.12C.6	12C	South Africa	3	Dorsal	D9	37.755	83.68	71.611	4.156	37.526	Training	Unheated	Heated
482	JM	Silcrete_Reflection_00482	D9.1.12C.6	12C	South Africa	4	Dorsal	D9	24.471	86.676	59.493	1.419	24.43	Training	Unheated	Unheated
483	JM	Silcrete_Reflection_00483	D9.1.12C.6	12C	South Africa	5	Ventral	D9	28.105	86.965	71.996	1.488	28.065	Training	Unheated	Unheated
484	JM	Silcrete_Reflection_00484	D9.1.12C.6	12C	South Africa	6	Ventral	D9	31.066	86.973	75.83	1.64	31.022	Training	Unheated	Unheated
485	JM	Silcrete_Reflection_00485	D9.1.12C.6	12C	South Africa	7	Ventral	D9	25.944	86.656	61.971	1.513	25.9	Training	Unheated	Unheated
486	JM	Silcrete_Reflection_00486	D9.1.12C.6	12C	South Africa	8	Ventral	D9	30.842	86.415	73.263	1.929	30.781	Training	Unheated	Unheated
607	JM	Silcrete_Reflection_00607	D9.1.12A.11	12A	South Africa	1	Dorsal	D9	26.72	84.54	72.096	2.543	26.599	Training	Unheated	Unheated
608	JM	Silcrete_Reflection_00608	D9.1.12A.11	12A	South Africa	2	Dorsal	D9	28.22	85.029	80.194	2.445	28.114	Training	Unheated	Unheated
609	JM	Silcrete_Reflection_00609	D9.1.12A.11	12A	South Africa	3	Dorsal	D9	32.245	77.217	50.616	7.135	31.446	Training	Unheated	Heated
610	JM	Silcrete_Reflection_00610	D9.1.12A.11	12A	South Africa	4	Dorsal	D9	26.987	84.168	74.77	2.742	26.847	Training	Unheated	Unheated
611	JM	Silcrete_Reflection_00611	D9.1.12A.11	12A	South Africa	5	Ventral	D9	33.189	78.594	65.832	6.564	32.533	Training	Unheated	Heated
612	JM	Silcrete_Reflection_00612	D9.1.12A.11	12A	South Africa	6	Ventral	D9	24.075	84.683	71.946	2.231	23.972	Training	Unheated	Unheated
613	JM	Silcrete_Reflection_00613	D9.1.12A.11	12A	South Africa	7	Ventral	D9	27.424	84.644	71.491	2.56	27.304	Training	Unheated	Unheated
614	JM	Silcrete_Reflection_00614	D9.1.12A.11	12A	South Africa	8	Ventral	D9	27.206	83.977	68.791	2.855	27.056	Training	Unheated	Unheated
615	JM	Silcrete_Reflection_00615	D9.1.12A.40	12A	South Africa	1	Dorsal	D9	26.788	82.321	65.471	3.579	26.548	Training	Unheated	Unheated
616	JM	Silcrete_Reflection_00616	D9.1.12A.40	12A	South Africa	2	Dorsal	D9	27.51	85.999	85.112	1.919	27.443	Training	Unheated	Unheated
617	JM	Silcrete_Reflection_00617	D9.1.12A.40	12A	South Africa	3	Dorsal	D9	27.773	84.223	74.608	2.796	27.632	Training	Unheated	Unheated
618	JM	Silcrete_Reflection_00618	D9.1.12A.40	12A	South Africa	4	Dorsal	D9	29.989	83.508	82.845	3.391	29.797	Training	Unheated	Unheated
619	JM	Silcrete_Reflection_00619	D9.1.12A.40	12A	South Africa	5	Ventral	D9	25.582	84.07	71.593	2.643	25.445	Training	Unheated	Unheated
620	JM	Silcrete_Reflection_00620	D9.1.12A.40	12A	South Africa	6	Ventral	D9	23.45	84.013	68.072	2.446	23.322	Training	Unheated	Unheated
621	JM	Silcrete_Reflection_00621	D9.1.12A.40	12A	South Africa	7	Ventral	D9	25.799	84.218	72.303	2.599	25.668	Training	Unheated	Unheated
622	JM	Silcrete_Reflection_00622	D9.1.12A.40	12A	South Africa	8	Ventral	D9	35.005	82.792	84.035	4.392	34.728	Training	Unheated	Heated
623	JM	Silcrete_Reflection_00623	D9.1.12A.30	12A	South Africa	1	Dorsal	D9	32.327	83.556	70.294	3.628	32.123	Training	Unheated	Unheated
624	JM	Silcrete_Reflection_00624	D9.1.12A.30	12A	South Africa	2	Dorsal	D9	31.814	78.412	52.072	6.39	31.166	Training	Unheated	Heated
625	JM	Silcrete_Reflection_00625	D9.1.12A.30	12A	South Africa	3	Dorsal	D9	29.665	79.072	51.379	5.624	29.127	Training	Unheated	Heated
626	JM	Silcrete_Reflection_00626	D9.1.12A.30	12A	South Africa	4	Dorsal	D9	26.114	85.624	74.874	1.992	26.038	Training	Unheated	Unheated
627	JM	Silcrete_Reflection_00627	D9.1.12A.30	12A	South Africa	5	Ventral	D9	32.01	81.767	74.374	4.584	31.68	Training	Unheated	Unheated
628	JM	Silcrete_Reflection_00628	D9.1.12A.30	12A	South Africa	6	Ventral	D9	31.938	83.267	75.218	3.744	31.718	Training	Unheated	Unheated
629	JM	Silcrete_Reflection_00629	D9.1.12A.30	12A	South Africa	7	Ventral	D9	29.304	83.703	71.872	3.214	29.127	Training	Unheated	Unheated
630	JM	Silcrete_Reflection_00630	D9.1.12A.30	12A	South Africa	8	Ventral	D9	28.157	83.293	65.052	3.289	27.965	Training	Unheated	Unheated
631	JM	Silcrete_Reflection_00631	D9.1.12A.34	12A	South Africa	1	Dorsal	D9	23.777	84.337	67.007	2.346	23.661	Training	Unheated	Unheated
632	JM	Silcrete_Reflection_00632	D9.1.12A.34	12A	South Africa	2	Dorsal	D9	24.754	84.726	69.797	2.275	24.649	Training	Unheated	Unheated
633	JM	Silcrete_Reflection_00633	D9.1.12A.34	12A	South Africa	3	Dorsal	D9	25.479	84.203	72.721	2.574	25.349	Training	Unheated	Unheated
634	JM	Silcrete_Reflection_00634	D9.1.12A.34	12A	South Africa	4	Dorsal	D9	23.14	83.688	62.808	2.544	22.999	Training	Unheated	Unheated
635	JM	Silcrete_Reflection_00635	D9.1.12A.34	12A	South Africa	5	Ventral	D9	27.313	83.555	68.519	3.066	27.14	Training	Unheated	Unheated
636	JM	Silcrete_Reflection_00636	D9.1.12A.34	12A	South Africa	6	Ventral	D9	20.025	82.812	47.91	2.506	19.867	OUTLIER	Unheated
637	JM	Silcrete_Reflection_00637	D9.1.12A.34	12A	South Africa	7	Ventral	D9	22.922	84.129	66.998	2.345	22.802	Training	Unheated	Unheated
638	JM	Silcrete_Reflection_00638	D9.1.12A.34	12A	South Africa	8	Ventral	D9	24.824	83.512	65.491	2.805	24.665	Training	Unheated	Unheated
639	JM	Silcrete_Reflection_00639	D9.1.12A.38	12A	South Africa	1	Dorsal	D9	26.201	82.49	60.236	3.424	25.976	Test	Unheated	Unheated
640	JM	Silcrete_Reflection_00640	D9.1.12A.38	12A	South Africa	2	Dorsal	D9	23.29	84.018	69.965	2.427	23.164	Test	Unheated	Unheated
641	JM	Silcrete_Reflection_00641	D9.1.12A.38	12A	South Africa	3	Dorsal	D9	26.438	84.149	68.936	2.695	26.3	Test	Unheated	Unheated
642	JM	Silcrete_Reflection_00642	D9.1.12A.38	12A	South Africa	4	Dorsal	D9	28.634	83.781	75.611	3.102	28.465	Test	Unheated	Unheated
643	JM	Silcrete_Reflection_00643	D9.1.12A.38	12A	South Africa	5	Ventral	D9	25.631	84.12	69.488	2.626	25.496	Test	Unheated	Unheated
644	JM	Silcrete_Reflection_00644	D9.1.12A.38	12A	South Africa	6	Ventral	D9	24.101	83.735	63.375	2.63	23.957	Test	Unheated	Unheated
645	JM	Silcrete_Reflection_00645	D9.1.12A.38	12A	South Africa	7	Ventral	D9	24.454	83.603	66.485	2.724	24.302	Test	Unheated	Unheated
646	JM	Silcrete_Reflection_00646	D9.1.12A.38	12A	South Africa	8	Ventral	D9	27.678	82.437	61.259	3.643	27.437	Test	Unheated	Unheated
647	JM	Silcrete_Reflection_00647	D9.1.12B.22	12B	South Africa	1	Dorsal	D9	34.288	76.646	62.812	7.92	33.36	Training	Heated	Heated
648	JM	Silcrete_Reflection_00648	D9.1.12B.22	12B	South Africa	2	Dorsal	D9	31.91	69.595	53.347	11.125	29.908	Training	Heated	Heated
649	JM	Silcrete_Reflection_00649	D9.1.12B.22	12B	South Africa	3	Dorsal	D9	27.163	74.876	43.929	7.087	26.222	Training	Heated	Heated
650	JM	Silcrete_Reflection_00650	D9.1.12B.22	12B	South Africa	4	Dorsal	D9	33.491	71.334	58.679	10.719	31.729	Training	Heated	Heated
651	JM	Silcrete_Reflection_00651	D9.1.12B.22	12B	South Africa	5	Ventral	D9	38.012	72.607	65.191	11.363	36.274	Training	Heated	Heated
652	JM	Silcrete_Reflection_00652	D9.1.12B.22	12B	South Africa	6	Ventral	D9	31.17	77.588	58.65	6.7	30.442	Training	Heated	Heated
653	JM	Silcrete_Reflection_00653	D9.1.12B.22	12B	South Africa	7	Ventral	D9	26.802	81.886	57.497	3.783	26.533	Training	Heated	Heated
654	JM	Silcrete_Reflection_00654	D9.1.12B.22	12B	South Africa	8	Ventral	D9	28.857	78.845	57.135	5.583	28.312	Training	Heated	Heated
655	JM	Silcrete_Reflection_00655	D9.1.12B.37	12B	South Africa	1	Dorsal	D9	26.779	80.893	52.77	4.239	26.442	Training	Heated	Heated
656	JM	Silcrete_Reflection_00656	D9.1.12B.37	12B	South Africa	2	Dorsal	D9	27.705	76.682	55.233	6.382	26.96	Training	Heated	Heated
657	JM	Silcrete_Reflection_00657	D9.1.12B.37	12B	South Africa	3	Dorsal	D9	31.936	60.485	49.062	15.733	27.791	Training	Heated	Heated
658	JM	Silcrete_Reflection_00658	D9.1.12B.37	12B	South Africa	4	Dorsal	D9	33.706	52.203	36.608	20.658	26.634	Training	Heated	Heated
659	JM	Silcrete_Reflection_00659	D9.1.12B.37	12B	South Africa	5	Ventral	D9	23.925	84.595	48.718	2.254	23.819	Training	Heated	Heated
660	JM	Silcrete_Reflection_00660	D9.1.12B.37	12B	South Africa	6	Ventral	D9	27.801	73.437	55.982	7.925	26.647	Training	Heated	Heated
661	JM	Silcrete_Reflection_00661	D9.1.12B.37	12B	South Africa	7	Ventral	D9	27.627	76.23	55.154	6.576	26.833	Training	Heated	Heated
662	JM	Silcrete_Reflection_00662	D9.1.12B.37	12B	South Africa	8	Ventral	D9	37.819	75.397	66.238	9.535	36.598	Training	Heated	Heated
663	JM	Silcrete_Reflection_00663	D9.1.12B.18	12B	South Africa	1	Dorsal	D9	25.675	64.31	32.968	11.13	23.137	OUTLIER	Heated
664	JM	Silcrete_Reflection_00664	D9.1.12B.18	12B	South Africa	2	Dorsal	D9	28.73	61.376	36.865	13.764	25.219	Training	Heated	Heated
665	JM	Silcrete_Reflection_00665	D9.1.12B.18	12B	South Africa	3	Dorsal	D9	31.295	82.025	63.925	4.342	30.992	Training	Heated	Heated
666	JM	Silcrete_Reflection_00666	D9.1.12B.18	12B	South Africa	4	Dorsal	D9	32.089	73.911	51.407	8.893	30.832	Training	Heated	Heated
667	JM	Silcrete_Reflection_00667	D9.1.12B.18	12B	South Africa	5	Ventral	D9	30.105	68.085	46.532	11.236	27.93	Training	Heated	Heated
668	JM	Silcrete_Reflection_00668	D9.1.12B.18	12B	South Africa	6	Ventral	D9	30.618	73.812	50.532	8.536	29.404	Training	Heated	Heated
669	JM	Silcrete_Reflection_00669	D9.1.12B.18	12B	South Africa	7	Ventral	D9	35.385	71.692	52.651	11.115	33.594	Training	Heated	Heated
670	JM	Silcrete_Reflection_00670	D9.1.12B.18	12B	South Africa	8	Ventral	D9	34.567	74.442	56.937	9.271	33.3	Training	Heated	Heated
671	JM	Silcrete_Reflection_00671	D9.1.12B.29	12B	South Africa	1	Dorsal	D9	42.434	62.399	56.147	19.66	37.605	Training	Heated	Heated
672	JM	Silcrete_Reflection_00672	D9.1.12B.29	12B	South Africa	2	Dorsal	D9	38.729	72.888	65.558	11.396	37.015	Training	Heated	Heated
673	JM	Silcrete_Reflection_00673	D9.1.12B.29	12B	South Africa	3	Dorsal	D9	28.605	74.364	52.202	7.71	27.546	Training	Heated	Heated
674	JM	Silcrete_Reflection_00674	D9.1.12B.29	12B	South Africa	4	Dorsal	D9	33.395	70.224	50.435	11.299	31.426	Training	Heated	Heated
675	JM	Silcrete_Reflection_00675	D9.1.12B.29	12B	South Africa	5	Ventral	D9	27.76	73.049	48.288	8.093	26.554	Training	Heated	Heated
676	JM	Silcrete_Reflection_00676	D9.1.12B.29	12B	South Africa	6	Ventral	D9	30.386	82.694	64.141	3.864	30.139	Training	Heated	Unheated
677	JM	Silcrete_Reflection_00677	D9.1.12B.29	12B	South Africa	7	Ventral	D9	34.713	67.115	50.975	13.5	31.981	Training	Heated	Heated
678	JM	Silcrete_Reflection_00678	D9.1.12B.29	12B	South Africa	8	Ventral	D9	36.07	78.289	67.618	7.321	35.319	Training	Heated	Heated
679	JM	Silcrete_Reflection_00679	D9.1.12B.27a	12B	South Africa	1	Dorsal	D9	34.908	85.378	82.149	2.813	34.795	Training	Heated	Unheated
680	JM	Silcrete_Reflection_00680	D9.1.12B.27a	12B	South Africa	2	Dorsal	D9	26.093	79.306	48.723	4.842	25.64	Training	Heated	Heated
681	JM	Silcrete_Reflection_00681	D9.1.12B.27a	12B	South Africa	3	Dorsal	D9	27.135	86.081	64.077	1.854	27.071	Training	Heated	Unheated
682	JM	Silcrete_Reflection_00682	D9.1.12B.27a	12B	South Africa	4	Dorsal	D9	32.588	78.66	64.361	6.408	31.952	Training	Heated	Heated
683	JM	Silcrete_Reflection_00683	D9.1.12B.27a	12B	South Africa	5	Ventral	D9	32.483	79.386	58.246	5.983	31.928	Training	Heated	Heated
684	JM	Silcrete_Reflection_00684	D9.1.12B.27a	12B	South Africa	6	Ventral	D9	33.085	72.344	52.742	10.035	31.526	Training	Heated	Heated
685	JM	Silcrete_Reflection_00685	D9.1.12B.27a	12B	South Africa	7	Ventral	D9	35.76	76.486	63.717	8.357	34.77	Training	Heated	Heated
686	JM	Silcrete_Reflection_00686	D9.1.12B.27a	12B	South Africa	8	Ventral	D9	36.61	79.322	71.802	6.784	35.976	Training	Heated	Heated
687	JM	Silcrete_Reflection_00687	E3.1.6A.61	6A	South Africa	1	Dorsal	E3	39.146	62.32	46.513	18.184	34.666	Validation	Heated	Heated
688	JM	Silcrete_Reflection_00688	E3.1.6A.61	6A	South Africa	2	Dorsal	E3	38.546	61.425	44.795	18.437	33.851	Validation	Heated	Heated
689	JM	Silcrete_Reflection_00689	E3.1.6A.61	6A	South Africa	3	Dorsal	E3	37.754	62.07	43.537	17.684	33.357	Validation	Heated	Heated
690	JM	Silcrete_Reflection_00690	E3.1.6A.61	6A	South Africa	4	Dorsal	E3	38.539	62.105	42.87	18.031	34.061	Validation	Heated	Heated
691	JM	Silcrete_Reflection_00691	E3.1.6A.61	6A	South Africa	5	Ventral	E3	43.754	60.691	49.092	21.418	38.153	Validation	Heated	Heated
692	JM	Silcrete_Reflection_00692	E3.1.6A.61	6A	South Africa	6	Ventral	E3	40.006	60.367	41.458	19.781	34.774	Validation	Heated	Heated
693	JM	Silcrete_Reflection_00693	E3.1.6A.61	6A	South Africa	7	Ventral	E3	42.029	60.545	43.511	20.667	36.596	Validation	Heated	Heated
694	JM	Silcrete_Reflection_00694	E3.1.6A.61	6A	South Africa	8	Ventral	E3	45.546	60.418	48.746	22.485	39.609	Validation	Heated	Heated
695	JM	Silcrete_Reflection_00695	E3.1.6A.34	6A	South Africa	1	Dorsal	E3	39.12	61.221	46.376	18.834	34.288	Training	Heated	Heated
696	JM	Silcrete_Reflection_00696	E3.1.6A.34	6A	South Africa	2	Dorsal	E3	48.201	60.26	54.734	23.911	41.852	Training	Heated	Heated
697	JM	Silcrete_Reflection_00697	E3.1.6A.34	6A	South Africa	3	Dorsal	E3	47.295	60.298	59.373	23.434	41.081	Training	Heated	Heated
698	JM	Silcrete_Reflection_00698	E3.1.6A.34	6A	South Africa	4	Dorsal	E3	42.263	59.367	45.919	21.535	36.365	Training	Heated	Heated
699	JM	Silcrete_Reflection_00699	E3.1.6A.34	6A	South Africa	5	Ventral	E3	46.429	60.654	57.756	22.754	40.471	Training	Heated	Heated
700	JM	Silcrete_Reflection_00700	E3.1.6A.34	6A	South Africa	6	Ventral	E3	47.883	59.448	55.951	24.34	41.235	Training	Heated	Heated
701	JM	Silcrete_Reflection_00701	E3.1.6A.34	6A	South Africa	7	Ventral	E3	43.388	60.011	50.695	21.687	37.579	Training	Heated	Heated
702	JM	Silcrete_Reflection_00702	E3.1.6A.34	6A	South Africa	8	Ventral	E3	43.194	63.379	57.688	19.355	38.615	Training	Heated	Heated
703	JM	Silcrete_Reflection_00703	E3.1.6A.36	6A	South Africa	1	Dorsal	E3	43.389	58.347	46.976	22.77	36.935	Training	Heated	Heated
704	JM	Silcrete_Reflection_00704	E3.1.6A.36	6A	South Africa	2	Dorsal	E3	52.543	57.836	63.696	27.971	44.48	Training	Heated	Unheated
705	JM	Silcrete_Reflection_00705	E3.1.6A.36	6A	South Africa	3	Dorsal	E3	42.838	60.017	50.33	21.408	37.106	Training	Heated	Heated
706	JM	Silcrete_Reflection_00706	E3.1.6A.36	6A	South Africa	4	Dorsal	E3	43.57	58.772	49.598	22.589	37.257	Training	Heated	Heated
707	JM	Silcrete_Reflection_00707	E3.1.6A.36	6A	South Africa	5	Ventral	E3	47.437	57.278	52.297	25.642	39.909	Training	Heated	Heated
708	JM	Silcrete_Reflection_00708	E3.1.6A.36	6A	South Africa	6	Ventral	E3	44.015	58.432	48.071	23.042	37.502	Training	Heated	Heated
709	JM	Silcrete_Reflection_00709	E3.1.6A.36	6A	South Africa	7	Ventral	E3	44.733	60.767	55.477	21.846	39.036	Training	Heated	Heated
710	JM	Silcrete_Reflection_00710	E3.1.6A.36	6A	South Africa	8	Ventral	E3	42.638	57.104	45.783	23.158	35.801	Training	Heated	Heated
711	JM	Silcrete_Reflection_00711	E3.1.6A.60	6A	South Africa	1	Dorsal	E3	33.26	61.837	36.904	15.698	29.322	Training	Heated	Heated
712	JM	Silcrete_Reflection_00712	E3.1.6A.60	6A	South Africa	2	Dorsal	E3	36.484	62.971	45.319	16.58	32.499	Training	Heated	Heated
713	JM	Silcrete_Reflection_00713	E3.1.6A.60	6A	South Africa	3	Dorsal	E3	44.799	60.839	54.524	21.829	39.121	Training	Heated	Heated
714	JM	Silcrete_Reflection_00714	E3.1.6A.60	6A	South Africa	4	Dorsal	E3	37.719	62.291	45.95	17.539	33.394	Training	Heated	Heated
715	JM	Silcrete_Reflection_00715	E3.1.6A.60	6A	South Africa	5	Ventral	E3	45.381	60.85	52.897	22.105	39.633	Training	Heated	Heated
716	JM	Silcrete_Reflection_00716	E3.1.6A.60	6A	South Africa	6	Ventral	E3	48.179	58.924	48.887	24.868	41.264	Training	Heated	Heated
717	JM	Silcrete_Reflection_00717	E3.1.6A.60	6A	South Africa	7	Ventral	E3	45.179	59.493	47.292	22.935	38.924	Training	Heated	Heated
718	JM	Silcrete_Reflection_00718	E3.1.6A.60	6A	South Africa	8	Ventral	E3	45.594	61.587	51.675	21.695	40.102	Training	Heated	Heated
719	JM	Silcrete_Reflection_00719	E3.1.6A.38	6A	South Africa	1	Dorsal	E3	42.667	59.191	47.501	21.853	36.646	Validation	Heated	Heated
720	JM	Silcrete_Reflection_00720	E3.1.6A.38	6A	South Africa	2	Dorsal	E3	45.873	58.399	52.164	24.037	39.071	Validation	Heated	Heated
721	JM	Silcrete_Reflection_00721	E3.1.6A.38	6A	South Africa	3	Dorsal	E3	41.123	57.8	43.707	21.913	34.798	Validation	Heated	Heated
722	JM	Silcrete_Reflection_00722	E3.1.6A.38	6A	South Africa	4	Dorsal	E3	41.021	60.589	47.993	20.144	35.734	Validation	Heated	Heated
723	JM	Silcrete_Reflection_00723	E3.1.6A.38	6A	South Africa	5	Ventral	E3	34.431	60.156	35.141	17.134	29.865	Validation	Heated	Heated
724	JM	Silcrete_Reflection_00724	E3.1.6A.38	6A	South Africa	6	Ventral	E3	38.921	59.017	41.925	20.036	33.368	Validation	Heated	Heated
725	JM	Silcrete_Reflection_00725	E3.1.6A.38	6A	South Africa	7	Ventral	E3	45.886	60.382	56.185	22.678	39.89	Validation	Heated	Heated
726	JM	Silcrete_Reflection_00726	E3.1.6A.38	6A	South Africa	8	Ventral	E3	44.84	59.704	54.249	22.621	38.716	Validation	Heated	Heated
727	JM	Silcrete_Reflection_00727	E3.1.1A.08	1A	South Africa	1	Dorsal	E3	43.372	76.853	62.163	9.865	42.235	Training	Unheated	Unheated
728	JM	Silcrete_Reflection_00728	E3.1.1A.08	1A	South Africa	2	Dorsal	E3	61.313	78.493	84.226	12.231	60.081	OUTLIER	Unheated
729	JM	Silcrete_Reflection_00729	E3.1.1A.08	1A	South Africa	3	Dorsal	E3	42.136	78.674	65.227	8.275	41.316	Training	Unheated	Unheated
730	JM	Silcrete_Reflection_00730	E3.1.1A.08	1A	South Africa	4	Dorsal	E3	52.754	74.667	73.269	13.95	50.877	Training	Unheated	Unheated
731	JM	Silcrete_Reflection_00731	E3.1.1A.08	1A	South Africa	5	Ventral	E3	44.069	79.518	69.176	8.018	43.334	Training	Unheated	Heated
732	JM	Silcrete_Reflection_00732	E3.1.1A.08	1A	South Africa	6	Ventral	E3	44.041	79.555	69.991	7.984	43.311	Training	Unheated	Heated
733	JM	Silcrete_Reflection_00733	E3.1.1A.08	1A	South Africa	7	Ventral	E3	42.296	77.534	60.163	9.13	41.299	Training	Unheated	Unheated
734	JM	Silcrete_Reflection_00734	E3.1.1A.08	1A	South Africa	8	Ventral	E3	48.423	77.829	71.389	10.209	47.335	Training	Unheated	Unheated
735	JM	Silcrete_Reflection_00735	E3.1.1A.46	1A	South Africa	1	Dorsal	E3	46.658	76.931	58.477	10.551	45.449	Training	Unheated	Unheated
736	JM	Silcrete_Reflection_00736	E3.1.1A.46	1A	South Africa	2	Dorsal	E3	40.936	76.74	44.747	9.39	39.844	OUTLIER	Unheated
737	JM	Silcrete_Reflection_00737	E3.1.1A.46	1A	South Africa	3	Dorsal	E3	51.032	76.951	72.019	11.522	49.714	Training	Unheated	Unheated
738	JM	Silcrete_Reflection_00738	E3.1.1A.46	1A	South Africa	4	Dorsal	E3	52.86	78.722	69.461	10.338	51.84	Training	Unheated	Unheated
739	JM	Silcrete_Reflection_00739	E3.1.1A.46	1A	South Africa	5	Ventral	E3	53.02	79.071	70.832	10.053	52.059	Training	Unheated	Unheated
740	JM	Silcrete_Reflection_00740	E3.1.1A.46	1A	South Africa	6	Ventral	E3	56.59	77.882	70.512	11.88	55.329	Training	Unheated	Unheated
741	JM	Silcrete_Reflection_00741	E3.1.1A.46	1A	South Africa	7	Ventral	E3	51.452	75.43	55.354	12.943	49.797	OUTLIER	Unheated
742	JM	Silcrete_Reflection_00742	E3.1.1A.46	1A	South Africa	8	Ventral	E3	56.798	76.191	67.208	13.557	55.157	Training	Unheated	Unheated
743	JM	Silcrete_Reflection_00743	E3.1.1A.50	1A	South Africa	1	Dorsal	E3	44.536	77.242	55.343	9.835	43.436	Training	Unheated	Unheated
744	JM	Silcrete_Reflection_00744	E3.1.1A.50	1A	South Africa	2	Dorsal	E3	42.103	78.369	51.524	8.489	41.239	Training	Unheated	Unheated
745	JM	Silcrete_Reflection_00745	E3.1.1A.50	1A	South Africa	3	Dorsal	E3	44.053	77.216	63.995	9.748	42.961	Training	Unheated	Unheated
746	JM	Silcrete_Reflection_00746	E3.1.1A.50	1A	South Africa	4	Dorsal	E3	48.978	76.323	66.512	11.581	47.589	Training	Unheated	Unheated
747	JM	Silcrete_Reflection_00747	E3.1.1A.50	1A	South Africa	5	Ventral	E3	58.467	76.186	72.44	13.96	56.776	Training	Unheated	Unheated
748	JM	Silcrete_Reflection_00748	E3.1.1A.50	1A	South Africa	6	Ventral	E3	54.446	78.309	67.367	11.033	53.317	Training	Unheated	Unheated
749	JM	Silcrete_Reflection_00749	E3.1.1A.50	1A	South Africa	7	Ventral	E3	60.545	77.125	74.423	13.491	59.023	Training	Unheated	Unheated
750	JM	Silcrete_Reflection_00750	E3.1.1A.50	1A	South Africa	8	Ventral	E3	49.932	78.632	62.029	9.842	48.952	Training	Unheated	Unheated
751	JM	Silcrete_Reflection_00751	E3.1.1A.48	1A	South Africa	1	Dorsal	E3	55.143	79.153	72.89	10.378	54.158	Test	Unheated	Unheated
752	JM	Silcrete_Reflection_00752	E3.1.1A.48	1A	South Africa	2	Dorsal	E3	53.184	76.107	63.831	12.77	51.628	Test	Unheated	Unheated
753	JM	Silcrete_Reflection_00753	E3.1.1A.48	1A	South Africa	3	Dorsal	E3	60.061	75.715	70.689	14.82	58.204	Test	Unheated	Unheated
754	JM	Silcrete_Reflection_00754	E3.1.1A.48	1A	South Africa	4	Dorsal	E3	52.998	74.995	67.032	13.721	51.191	Test	Unheated	Unheated
755	JM	Silcrete_Reflection_00755	E3.1.1A.48	1A	South Africa	5	Ventral	E3	60.682	76.296	71.996	14.376	58.955	Test	Unheated	Unheated
756	JM	Silcrete_Reflection_00756	E3.1.1A.48	1A	South Africa	6	Ventral	E3	58.15	78.062	73.386	12.029	56.893	Test	Unheated	Unheated
757	JM	Silcrete_Reflection_00757	E3.1.1A.48	1A	South Africa	7	Ventral	E3	55.642	76.387	63.375	13.096	54.079	Test	Unheated	Unheated
758	JM	Silcrete_Reflection_00758	E3.1.1A.48	1A	South Africa	8	Ventral	E3	63.127	75.828	74.078	15.456	61.206	OUTLIER	Unheated
759	JM	Silcrete_Reflection_00759	E3.1.1A.14	1A	South Africa	1	Dorsal	E3	40.679	77.734	60.116	8.642	39.75	Test	Unheated	Unheated
760	JM	Silcrete_Reflection_00760	E3.1.1A.14	1A	South Africa	2	Dorsal	E3	40.35	75.686	54.086	9.976	39.097	Test	Unheated	Unheated
761	JM	Silcrete_Reflection_00761	E3.1.1A.14	1A	South Africa	3	Dorsal	E3	39.819	77.479	58.487	8.633	38.872	Test	Unheated	Heated
762	JM	Silcrete_Reflection_00762	E3.1.1A.14	1A	South Africa	4	Dorsal	E3	38.833	77.688	55.09	8.281	37.94	Test	Unheated	Heated
763	JM	Silcrete_Reflection_00763	E3.1.1A.14	1A	South Africa	5	Ventral	E3	51.154	78.02	76.53	10.618	50.04	Test	Unheated	Unheated
764	JM	Silcrete_Reflection_00764	E3.1.1A.14	1A	South Africa	6	Ventral	E3	46.42	77.488	67.869	10.057	45.317	Test	Unheated	Unheated
765	JM	Silcrete_Reflection_00765	E3.1.1A.14	1A	South Africa	7	Ventral	E3	29.887	79.228	49.591	5.586	29.361	Test	Unheated	Unheated
766	JM	Silcrete_Reflection_00766	E3.1.1A.14	1A	South Africa	8	Ventral	E3	47.803	76.65	70.396	11.037	46.511	Test	Unheated	Unheated
767	JM	Silcrete_Reflection_00767	I14.2.16A.06	16A	South Africa	1	Dorsal	I14	34.178	80.969	59.704	5.365	33.755	Training	Unheated	Heated
768	JM	Silcrete_Reflection_00768	I14.2.16A.06	16A	South Africa	2	Dorsal	I14	31.767	84.158	67.71	3.233	31.602	Training	Unheated	Unheated
769	JM	Silcrete_Reflection_00769	I14.2.16A.06	16A	South Africa	3	Dorsal	I14	30.377	84.864	72.105	2.719	30.255	Training	Unheated	Unheated
770	JM	Silcrete_Reflection_00770	I14.2.16A.06	16A	South Africa	4	Dorsal	I14	34.549	82.457	66.257	4.535	34.25	Training	Unheated	Heated
771	JM	Silcrete_Reflection_00771	I14.2.16A.06	16A	South Africa	5	Ventral	I14	31.578	85.73	78.757	2.351	31.49	Training	Unheated	Unheated
772	JM	Silcrete_Reflection_00772	I14.2.16A.06	16A	South Africa	6	Ventral	I14	32.154	84.492	71.002	3.086	32.006	Training	Unheated	Unheated
773	JM	Silcrete_Reflection_00773	I14.2.16A.06	16A	South Africa	7	Ventral	I14	30.327	84.416	66.65	2.951	30.183	Training	Unheated	Unheated
774	JM	Silcrete_Reflection_00774	I14.2.16A.06	16A	South Africa	8	Ventral	I14	38.383	82.352	73.439	5.108	38.041	Training	Unheated	Unheated
775	JM	Silcrete_Reflection_00775	I14.2.16A.32	16A	South Africa	1	Dorsal	I14	37.651	82.374	71.671	4.996	37.318	Validation	Unheated	Heated
776	JM	Silcrete_Reflection_00776	I14.2.16A.32	16A	South Africa	2	Dorsal	I14	29.642	81.925	55.081	4.164	29.348	Validation	Unheated	Heated
777	JM	Silcrete_Reflection_00777	I14.2.16A.32	16A	South Africa	3	Dorsal	I14	32.98	85.894	82.963	2.361	32.895	Validation	Unheated	Unheated
778	JM	Silcrete_Reflection_00778	I14.2.16A.32	16A	South Africa	4	Dorsal	I14	31.105	84.083	76.562	3.206	30.94	Validation	Unheated	Unheated
779	JM	Silcrete_Reflection_00779	I14.2.16A.32	16A	South Africa	5	Ventral	I14	40.599	82.586	74.348	5.239	40.26	Validation	Unheated	Unheated
780	JM	Silcrete_Reflection_00780	I14.2.16A.32	16A	South Africa	6	Ventral	I14	33.727	85.486	87.337	2.654	33.622	Validation	Unheated	Unheated
781	JM	Silcrete_Reflection_00781	I14.2.16A.32	16A	South Africa	7	Ventral	I14	30.889	85.347	76.533	2.506	30.787	Validation	Unheated	Unheated
782	JM	Silcrete_Reflection_00782	I14.2.16A.32	16A	South Africa	8	Ventral	I14	33.898	85.623	85.688	2.587	33.799	Validation	Unheated	Unheated
783	JM	Silcrete_Reflection_00783	I14.2.16A.28	16A	South Africa	1	Dorsal	I14	34.457	82.152	63.134	4.705	34.134	Training	Unheated	Unheated
784	JM	Silcrete_Reflection_00784	I14.2.16A.28	16A	South Africa	2	Dorsal	I14	33.805	84.325	77.806	3.343	33.639	Training	Unheated	Unheated
785	JM	Silcrete_Reflection_00785	I14.2.16A.28	16A	South Africa	3	Dorsal	I14	30.407	84.079	73.408	3.137	30.245	Training	Unheated	Unheated
786	JM	Silcrete_Reflection_00786	I14.2.16A.28	16A	South Africa	4	Dorsal	I14	39.515	83.646	84.316	4.373	39.272	Training	Unheated	Unheated
787	JM	Silcrete_Reflection_00787	I14.2.16A.28	16A	South Africa	5	Ventral	I14	40.796	82.463	76.215	5.351	40.444	Training	Unheated	Unheated
788	JM	Silcrete_Reflection_00788	I14.2.16A.28	16A	South Africa	6	Ventral	I14	41.518	82.581	76.644	5.361	41.171	Training	Unheated	Unheated
789	JM	Silcrete_Reflection_00789	I14.2.16A.28	16A	South Africa	7	Ventral	I14	32.219	85.437	83.664	2.563	32.117	Training	Unheated	Unheated
790	JM	Silcrete_Reflection_00790	I14.2.16A.28	16A	South Africa	8	Ventral	I14	30.968	83.431	67.429	3.543	30.765	Training	Unheated	Unheated
791		Silcrete_Reflection_00791	I14.2.16A.13	16A	South Africa	1	Dorsal	I14	34.457	82.152	63.134	4.705	34.134	Validation	Unheated	Unheated
792		Silcrete_Reflection_00792	I14.2.16A.13	16A	South Africa	2	Dorsal	I14	33.805	84.325	77.806	3.343	33.639	Validation	Unheated	Unheated
793		Silcrete_Reflection_00793	I14.2.16A.13	16A	South Africa	3	Dorsal	I14	30.407	84.079	73.408	3.137	30.245	Validation	Unheated	Unheated
794		Silcrete_Reflection_00794	I14.2.16A.13	16A	South Africa	4	Dorsal	I14	39.515	83.646	84.316	4.373	39.272	Validation	Unheated	Unheated
795		Silcrete_Reflection_00795	I14.2.16A.13	16A	South Africa	5	Ventral	I14	40.796	82.463	76.215	5.351	40.444	Validation	Unheated	Unheated
796		Silcrete_Reflection_00796	I14.2.16A.13	16A	South Africa	6	Ventral	I14	41.518	82.581	76.644	5.361	41.171	Validation	Unheated	Unheated
797		Silcrete_Reflection_00797	I14.2.16A.13	16A	South Africa	7	Ventral	I14	32.219	85.437	83.664	2.563	32.117	Validation	Unheated	Unheated
798		Silcrete_Reflection_00798	I14.2.16A.13	16A	South Africa	8	Ventral	I14	30.968	83.431	67.429	3.543	30.765	Validation	Unheated	Unheated
799	JM	Silcrete_Reflection_00799	I14.2.16A.23	16A	South Africa	1	Dorsal	I14	25.044	86.046	68.23	1.727	24.984	Training	Unheated	Unheated
800	JM	Silcrete_Reflection_00800	I14.2.16A.23	16A	South Africa	2	Dorsal	I14	29.206	85.6	80.996	2.24	29.12	Training	Unheated	Unheated
801	JM	Silcrete_Reflection_00801	I14.2.16A.23	16A	South Africa	3	Dorsal	I14	37.416	82.801	71.528	4.689	37.121	Training	Unheated	Heated
802	JM	Silcrete_Reflection_00802	I14.2.16A.23	16A	South Africa	4	Dorsal	I14	27.792	86.178	69.408	1.852	27.73	Training	Unheated	Unheated
803	JM	Silcrete_Reflection_00803	I14.2.16A.23	16A	South Africa	5	Ventral	I14	32.865	85.238	80.804	2.728	32.751	Training	Unheated	Unheated
804	JM	Silcrete_Reflection_00804	I14.2.16A.23	16A	South Africa	6	Ventral	I14	30.051	85.057	76.058	2.589	29.939	Training	Unheated	Unheated
805	JM	Silcrete_Reflection_00805	I14.2.16A.23	16A	South Africa	7	Ventral	I14	30.07	86.644	86.828	1.76	30.019	Training	Unheated	Unheated
806	JM	Silcrete_Reflection_00806	I14.2.16A.23	16A	South Africa	8	Ventral	I14	29.959	85.809	79.375	2.189	29.879	Training	Unheated	Unheated
807	JM	Silcrete_Reflection_00807	I14.2.16A.37	16A	South Africa	1	Dorsal	I14	30.503	84.052	68.205	3.161	30.339	Training	Unheated	Unheated
808	JM	Silcrete_Reflection_00808	I14.2.16A.37	16A	South Africa	2	Dorsal	I14	27.601	84.801	67.942	2.501	27.488	Training	Unheated	Unheated
809	JM	Silcrete_Reflection_00809	I14.2.16A.37	16A	South Africa	3	Dorsal	I14	26.773	84.791	61.606	2.431	26.662	Training	Unheated	Unheated
810	JM	Silcrete_Reflection_00810	I14.2.16A.37	16A	South Africa	4	Dorsal	I14	34.785	83.284	69.511	4.068	34.546	Training	Unheated	Unheated
811	JM	Silcrete_Reflection_00811	I14.2.16A.37	16A	South Africa	5	Ventral	I14	29.474	86.331	75.906	1.886	29.413	Training	Unheated	Unheated
812	JM	Silcrete_Reflection_00812	I14.2.16A.37	16A	South Africa	6	Ventral	I14	43.561	82.876	78.82	5.402	43.225	Training	Unheated	Unheated
813	JM	Silcrete_Reflection_00813	I14.2.16A.37	16A	South Africa	7	Ventral	I14	25.37	82.762	46.73	3.196	25.168	Training	Unheated	Heated
814	JM	Silcrete_Reflection_00814	I14.2.16A.37	16A	South Africa	8	Ventral	I14	33.842	83.53	71.009	3.813	33.626	Training	Unheated	Unheated
815	JM	Silcrete_Reflection_00815	I14.2.16A.35	16A	South Africa	1	Dorsal	I14	34.926	84.779	75.437	3.178	34.781	Training	Unheated	Unheated
816	JM	Silcrete_Reflection_00816	I14.2.16A.35	16A	South Africa	2	Dorsal	I14	31.553	84.043	64.053	3.275	31.383	Training	Unheated	Unheated
817	JM	Silcrete_Reflection_00817	I14.2.16A.35	16A	South Africa	3	Dorsal	I14	29.089	83.356	57.525	3.366	28.894	Training	Unheated	Heated
818	JM	Silcrete_Reflection_00818	I14.2.16A.35	16A	South Africa	4	Dorsal	I14	30.244	85.845	75.836	2.191	30.165	Training	Unheated	Unheated
819	JM	Silcrete_Reflection_00819	I14.2.16A.35	16A	South Africa	5	Ventral	I14	40.289	82.173	73.166	5.487	39.913	Training	Unheated	Unheated
820	JM	Silcrete_Reflection_00820	I14.2.16A.35	16A	South Africa	6	Ventral	I14	35.858	83.1	69.164	4.308	35.599	Training	Unheated	Unheated
821	JM	Silcrete_Reflection_00821	I14.2.16A.35	16A	South Africa	7	Ventral	I14	39.942	81.958	73.304	5.588	39.549	Training	Unheated	Unheated
822	JM	Silcrete_Reflection_00822	I14.2.16A.35	16A	South Africa	8	Ventral	I14	31.158	84.54	67.155	2.965	31.017	Training	Unheated	Unheated
823	JM	Silcrete_Reflection_00823	I14.2.16A.07	16A	South Africa	1	Dorsal	I14	32.301	85.596	80.872	2.481	32.206	Training	Unheated	Unheated
824	JM	Silcrete_Reflection_00824	I14.2.16A.07	16A	South Africa	2	Dorsal	I14	28.588	85.251	68.357	2.367	28.49	Training	Unheated	Unheated
825	JM	Silcrete_Reflection_00825	I14.2.16A.07	16A	South Africa	3	Dorsal	I14	27.769	85.628	69.605	2.117	27.688	Training	Unheated	Unheated
826	JM	Silcrete_Reflection_00826	I14.2.16A.07	16A	South Africa	4	Dorsal	I14	31.463	85.546	72.734	2.444	31.368	Training	Unheated	Unheated
827	JM	Silcrete_Reflection_00827	I14.2.16A.07	16A	South Africa	5	Ventral	I14	37.168	84.265	80.519	3.714	36.982	Training	Unheated	Unheated
828	JM	Silcrete_Reflection_00828	I14.2.16A.07	16A	South Africa	6	Ventral	I14	41.016	82.953	77.077	5.032	40.707	Training	Unheated	Unheated
829	JM	Silcrete_Reflection_00829	I14.2.16A.07	16A	South Africa	7	Ventral	I14	22.763	85.365	62.999	1.839	22.689	Training	Unheated	Unheated
830	JM	Silcrete_Reflection_00830	I14.2.16A.07	16A	South Africa	8	Ventral	I14	27.068	85.983	72.312	1.896	27.002	Training	Unheated	Unheated
831	JM	Silcrete_Reflection_00831	I14.2.16A.04	16A	South Africa	1	Dorsal	I14	29.659	85.411	72.551	2.373	29.564	Training	Unheated	Unheated
832	JM	Silcrete_Reflection_00832	I14.2.16A.04	16A	South Africa	2	Dorsal	I14	30.609	85.069	73.324	2.631	30.495	Training	Unheated	Unheated
833	JM	Silcrete_Reflection_00833	I14.2.16A.04	16A	South Africa	3	Dorsal	I14	25.235	84.873	63.409	2.255	25.134	Training	Unheated	Unheated
834	JM	Silcrete_Reflection_00834	I14.2.16A.04	16A	South Africa	4	Dorsal	I14	34.09	83.182	71.333	4.047	33.849	Training	Unheated	Unheated
835	JM	Silcrete_Reflection_00835	I14.2.16A.04	16A	South Africa	5	Ventral	I14	39.368	84.225	80.402	3.961	39.168	Training	Unheated	Unheated
836	JM	Silcrete_Reflection_00836	I14.2.16A.04	16A	South Africa	6	Ventral	I14	26.155	84.839	65.213	2.353	26.049	Training	Unheated	Unheated
837	JM	Silcrete_Reflection_00837	I14.2.16A.04	16A	South Africa	7	Ventral	I14	27.016	84.397	62.084	2.638	26.887	Training	Unheated	Unheated
838	JM	Silcrete_Reflection_00838	I14.2.16A.04	16A	South Africa	8	Ventral	I14	38.886	83.397	76.757	4.471	38.628	Training	Unheated	Unheated
839	JM	Silcrete_Reflection_00839	I14.2.16A.44	16A	South Africa	1	Dorsal	I14	36.444	81.682	65.484	5.272	36.061	Test	Unheated	Unheated
840	JM	Silcrete_Reflection_00840	I14.2.16A.44	16A	South Africa	2	Dorsal	I14	40.239	83.817	81.011	4.334	40.005	Test	Unheated	Unheated
841	JM	Silcrete_Reflection_00841	I14.2.16A.44	16A	South Africa	3	Dorsal	I14	29.534	84.899	72.658	2.626	29.417	Test	Unheated	Unheated
842	JM	Silcrete_Reflection_00842	I14.2.16A.44	16A	South Africa	4	Dorsal	I14	35.717	82.886	69.645	4.423	35.442	Test	Unheated	Unheated
843	JM	Silcrete_Reflection_00843	I14.2.16A.44	16A	South Africa	5	Ventral	I14	42.195	82.882	76.568	5.229	41.87	Test	Unheated	Unheated
844	JM	Silcrete_Reflection_00844	I14.2.16A.44	16A	South Africa	6	Ventral	I14	33.983	81.954	62.042	4.757	33.648	Test	Unheated	Unheated
845	JM	Silcrete_Reflection_00845	I14.2.16A.44	16A	South Africa	7	Ventral	I14	32.259	85.553	84.706	2.502	32.162	Test	Unheated	Unheated
846	JM	Silcrete_Reflection_00846	I14.2.16A.44	16A	South Africa	8	Ventral	I14	39.717	82.74	76.086	5.019	39.398	Test	Unheated	Unheated
847	JM	Silcrete_Reflection_00847	I14.2.16B.10	16B	South Africa	1	Dorsal	I14	28.762	75.815	54.475	7.048	27.885	Test	Heated	Heated
848	JM	Silcrete_Reflection_00848	I14.2.16B.10	16B	South Africa	2	Dorsal	I14	36.96	79.223	70.735	6.911	36.308	Test	Heated	Heated
849	JM	Silcrete_Reflection_00849	I14.2.16B.10	16B	South Africa	3	Dorsal	I14	41.509	70.122	64.217	14.114	39.036	Test	Heated	Heated
850	JM	Silcrete_Reflection_00850	I14.2.16B.10	16B	South Africa	4	Dorsal	I14	38.313	71.833	63.307	11.945	36.403	Test	Heated	Heated
851	JM	Silcrete_Reflection_00851	I14.2.16B.10	16B	South Africa	5	Ventral	I14	39.222	75.037	72.56	10.127	37.892	Test	Heated	Heated
852	JM	Silcrete_Reflection_00852	I14.2.16B.10	16B	South Africa	6	Ventral	I14	34.456	76.821	70.116	7.856	33.548	Test	Heated	Heated
853	JM	Silcrete_Reflection_00853	I14.2.16B.10	16B	South Africa	7	Ventral	I14	37.245	77.76	75.793	7.896	36.398	Test	Heated	Heated
854	JM	Silcrete_Reflection_00854	I14.2.16B.10	16B	South Africa	8	Ventral	I14	47.335	70.478	71.587	15.818	44.614	Test	Heated	Heated
855	JM	Silcrete_Reflection_00855	I14.2.16B.15	16B	South Africa	1	Dorsal	I14	36.646	82.438	71.938	4.823	36.327	Training	Heated	Unheated
856	JM	Silcrete_Reflection_00856	I14.2.16B.15	16B	South Africa	2	Dorsal	I14	30.771	78.721	59.631	6.019	30.177	Training	Heated	Heated
857	JM	Silcrete_Reflection_00857	I14.2.16B.15	16B	South Africa	3	Dorsal	I14	41.018	74.805	63.298	10.751	39.584	Training	Heated	Heated
858	JM	Silcrete_Reflection_00858	I14.2.16B.15	16B	South Africa	4	Dorsal	I14	31.88	79.779	57.607	5.657	31.374	Training	Heated	Heated
859	JM	Silcrete_Reflection_00859	I14.2.16B.15	16B	South Africa	5	Ventral	I14	32.183	74.901	50.319	8.383	31.072	Training	Heated	Heated
860	JM	Silcrete_Reflection_00860	I14.2.16B.15	16B	South Africa	6	Ventral	I14	28.815	79.621	67.318	5.192	28.344	Training	Heated	Unheated
861	JM	Silcrete_Reflection_00861	I14.2.16B.15	16B	South Africa	7	Ventral	I14	33.551	81.602	67.772	4.9	33.191	Training	Heated	Unheated
862	JM	Silcrete_Reflection_00862	I14.2.16B.15	16B	South Africa	8	Ventral	I14	38.931	81.776	77.933	5.569	38.531	Training	Heated	Unheated
863	JM	Silcrete_Reflection_00863	I14.2.16B.42	16B	South Africa	1	Dorsal	I14	40.424	73.77	68.811	11.298	38.813	Training	Heated	Heated
864	JM	Silcrete_Reflection_00864	I14.2.16B.42	16B	South Africa	2	Dorsal	I14	40.827	74.577	73.121	10.857	39.357	Training	Heated	Heated
865	JM	Silcrete_Reflection_00865	I14.2.16B.42	16B	South Africa	3	Dorsal	I14	41.6	74.295	70.75	11.261	40.047	Training	Heated	Heated
866	JM	Silcrete_Reflection_00866	I14.2.16B.42	16B	South Africa	4	Dorsal	I14	36.141	76.874	63.942	8.207	35.197	Training	Heated	Heated
867	JM	Silcrete_Reflection_00867	I14.2.16B.42	16B	South Africa	5	Ventral	I14	42.988	71.971	72.395	13.305	40.877	Training	Heated	Heated
868	JM	Silcrete_Reflection_00868	I14.2.16B.42	16B	South Africa	6	Ventral	I14	38.94	76.436	79.426	9.133	37.854	Training	Heated	Heated
869	JM	Silcrete_Reflection_00869	I14.2.16B.42	16B	South Africa	7	Ventral	I14	38.886	74.051	65.979	10.685	37.389	Training	Heated	Heated
870	JM	Silcrete_Reflection_00870	I14.2.16B.42	16B	South Africa	8	Ventral	I14	26.681	80.201	58.717	4.541	26.292	Training	Heated	Heated
871	JM	Silcrete_Reflection_00871	I14.2.16B.47	16B	South Africa	1	Dorsal	I14	27.893	79.941	61.622	4.872	27.464	Validation	Heated	Heated
872	JM	Silcrete_Reflection_00872	I14.2.16B.47	16B	South Africa	2	Dorsal	I14	32.212	82.039	87.978	4.461	31.902	Validation	Heated	Heated
873	JM	Silcrete_Reflection_00873	I14.2.16B.47	16B	South Africa	3	Dorsal	I14	33.498	81.446	87.885	4.982	33.126	Validation	Heated	Heated
874	JM	Silcrete_Reflection_00874	I14.2.16B.47	16B	South Africa	4	Dorsal	I14	32.867	81.027	86.745	5.127	32.465	Validation	Heated	Heated
875	JM	Silcrete_Reflection_00875	I14.2.16B.47	16B	South Africa	5	Ventral	I14	45.234	74.338	72.758	12.211	43.554	Validation	Heated	Heated
876	JM	Silcrete_Reflection_00876	I14.2.16B.47	16B	South Africa	6	Ventral	I14	33.184	79.987	69.912	5.77	32.679	Validation	Heated	Heated
877	JM	Silcrete_Reflection_00877	I14.2.16B.47	16B	South Africa	7	Ventral	I14	30.215	79.498	68.987	5.507	29.709	Validation	Heated	Heated
878	JM	Silcrete_Reflection_00878	I14.2.16B.47	16B	South Africa	8	Ventral	I14	37.042	81.697	71.736	5.349	36.654	Validation	Heated	Heated
879	JM	Silcrete_Reflection_00879	I14.2.16B.49	16B	South Africa	1	Dorsal	I14	35.724	82.415	85.463	4.715	35.411	Training	Heated	Unheated
880	JM	Silcrete_Reflection_00880	I14.2.16B.49	16B	South Africa	2	Dorsal	I14	41.122	73.587	67.826	11.62	39.446	Training	Heated	Heated
881	JM	Silcrete_Reflection_00881	I14.2.16B.49	16B	South Africa	3	Dorsal	I14	41.445	77.129	71.673	9.232	40.404	Training	Heated	Heated
882	JM	Silcrete_Reflection_00882	I14.2.16B.49	16B	South Africa	4	Dorsal	I14	39.395	74.065	63.912	10.816	37.881	Training	Heated	Heated
883	JM	Silcrete_Reflection_00883	I14.2.16B.49	16B	South Africa	5	Ventral	I14	33.182	83.292	89.829	3.876	32.955	Training	Heated	Unheated
884	JM	Silcrete_Reflection_00884	I14.2.16B.49	16B	South Africa	6	Ventral	I14	35.496	76.225	63.845	8.452	34.476	Training	Heated	Heated
885	JM	Silcrete_Reflection_00885	I14.2.16B.49	16B	South Africa	7	Ventral	I14	39.963	79.479	74.295	7.297	39.291	Training	Heated	Heated
886	JM	Silcrete_Reflection_00886	I14.2.16B.49	16B	South Africa	8	Ventral	I14	34.033	81.416	78.16	5.08	33.652	Training	Heated	Heated
887	JM	Silcrete_Reflection_00887	I14.2.16B.61	16B	South Africa	1	Dorsal	I14	30.164	82.119	79.997	4.136	29.879	Training	Heated	Unheated
888	JM	Silcrete_Reflection_00888	I14.2.16B.61	16B	South Africa	2	Dorsal	I14	31.898	80.464	70.515	5.285	31.457	Training	Heated	Heated
889	JM	Silcrete_Reflection_00889	I14.2.16B.61	16B	South Africa	3	Dorsal	I14	31.422	76.706	60.803	7.226	30.58	Training	Heated	Heated
890	JM	Silcrete_Reflection_00890	I14.2.16B.61	16B	South Africa	4	Dorsal	I14	27.735	80.975	63.573	4.351	27.392	Training	Heated	Unheated
891	JM	Silcrete_Reflection_00891	I14.2.16B.61	16B	South Africa	5	Ventral	I14	38.561	74.679	65.55	10.189	37.19	Training	Heated	Heated
892	JM	Silcrete_Reflection_00892	I14.2.16B.61	16B	South Africa	6	Ventral	I14	28.959	79.752	59.019	5.152	28.497	Training	Heated	Heated
893	JM	Silcrete_Reflection_00893	I14.2.16B.61	16B	South Africa	7	Ventral	I14	46.835	73.075	70.965	13.635	44.807	Training	Heated	Heated
894	JM	Silcrete_Reflection_00894	I14.2.16B.61	16B	South Africa	8	Ventral	I14	30.748	82.16	85.139	4.194	30.46	Training	Heated	Unheated
895	JM	Silcrete_Reflection_00895	I14.2.16B.55a	16B	South Africa	1	Dorsal	I14	27.301	76.945	56.759	6.167	26.595	Training	Heated	Heated
896	JM	Silcrete_Reflection_00896	I14.2.16B.55a	16B	South Africa	2	Dorsal	I14	41.573	76.058	75.297	10.017	40.349	Training	Heated	Heated
897	JM	Silcrete_Reflection_00897	I14.2.16B.55a	16B	South Africa	3	Dorsal	I14	44.3	81.302	86.444	6.699	43.791	Training	Heated	Unheated
898	JM	Silcrete_Reflection_00898	I14.2.16B.55a	16B	South Africa	4	Dorsal	I14	41	77.782	72.459	8.677	40.071	Training	Heated	Heated
899	JM	Silcrete_Reflection_00899	I14.2.16B.55a	16B	South Africa	5	Ventral	I14	33.098	79.305	71.203	6.142	32.523	Training	Heated	Heated
900	JM	Silcrete_Reflection_00900	I14.2.16B.55a	16B	South Africa	6	Ventral	I14	36.816	79.687	68.99	6.591	36.222	Training	Heated	Heated
901	JM	Silcrete_Reflection_00901	I14.2.16B.55a	16B	South Africa	7	Ventral	I14	24.648	79.137	54.702	4.645	24.206	Training	Heated	Heated
902	JM	Silcrete_Reflection_00902	I14.2.16B.55a	16B	South Africa	8	Ventral	I14	34.293	75.865	63.385	8.375	33.255	Training	Heated	Heated
903	JM	Silcrete_Reflection_00903	I14.2.16B.41	16B	South Africa	1	Dorsal	I14	32.588	81.253	79.758	4.956	32.209	Training	Heated	Heated
904	JM	Silcrete_Reflection_00904	I14.2.16B.41	16B	South Africa	2	Dorsal	I14	40.53	73.206	68.232	11.71	38.801	Training	Heated	Heated
905	JM	Silcrete_Reflection_00905	I14.2.16B.41	16B	South Africa	3	Dorsal	I14	25.82	82.455	68.791	3.39	25.597	Training	Heated	Unheated
906	JM	Silcrete_Reflection_00906	I14.2.16B.41	16B	South Africa	4	Dorsal	I14	33.843	79.407	70.485	6.222	33.266	Training	Heated	Heated
907	JM	Silcrete_Reflection_00907	I14.2.16B.41	16B	South Africa	5	Ventral	I14	45.602	73.185	77.303	13.192	43.652	Training	Heated	Heated
908	JM	Silcrete_Reflection_00908	I14.2.16B.41	16B	South Africa	6	Ventral	I14	31.513	80.94	71.678	4.962	31.12	Training	Heated	Heated
909	JM	Silcrete_Reflection_00909	I14.2.16B.41	16B	South Africa	7	Ventral	I14	39.854	74.466	64.33	10.673	38.398	Training	Heated	Heated
910	JM	Silcrete_Reflection_00910	I14.2.16B.41	16B	South Africa	8	Ventral	I14	34.53	80.684	73.629	5.59	34.075	Training	Heated	Heated
911	JM	Silcrete_Reflection_00911	I14.2.16B.29	16B	South Africa	1	Dorsal	I14	32.018	80.237	63.174	5.429	31.554	Training	Heated	Heated
912	JM	Silcrete_Reflection_00912	I14.2.16B.29	16B	South Africa	2	Dorsal	I14	33.936	75.978	61.587	8.223	32.925	Training	Heated	Heated
913	JM	Silcrete_Reflection_00913	I14.2.16B.29	16B	South Africa	3	Dorsal	I14	39.464	77.172	75.192	8.762	38.479	Training	Heated	Heated
914	JM	Silcrete_Reflection_00914	I14.2.16B.29	16B	South Africa	4	Dorsal	I14	30.095	76.666	59.258	6.941	29.284	Training	Heated	Heated
915	JM	Silcrete_Reflection_00915	I14.2.16B.29	16B	South Africa	5	Ventral	I14	28.951	75.569	57.781	7.215	28.038	Training	Heated	Heated
916	JM	Silcrete_Reflection_00916	I14.2.16B.29	16B	South Africa	6	Ventral	I14	37.647	80.362	69.224	6.303	37.115	Training	Heated	Heated
917	JM	Silcrete_Reflection_00917	I14.2.16B.29	16B	South Africa	7	Ventral	I14	36.996	82.197	70.315	5.023	36.654	Training	Heated	Unheated
918	JM	Silcrete_Reflection_00918	I14.2.16B.29	16B	South Africa	8	Ventral	I14	32.04	74.293	58.391	8.674	30.844	Training	Heated	Heated
919	JM	Silcrete_Reflection_00919	I14.2.16B.59	16B	South Africa	1	Dorsal	I14	37.857	75.693	69.929	9.355	36.683	Training	Heated	Heated
920	JM	Silcrete_Reflection_00920	I14.2.16B.59	16B	South Africa	2	Dorsal	I14	34.659	81.826	79.253	4.928	34.307	Training	Heated	Heated
921	JM	Silcrete_Reflection_00921	I14.2.16B.59	16B	South Africa	3	Dorsal	I14	34.612	79.137	79.101	6.523	33.991	Training	Heated	Heated
922	JM	Silcrete_Reflection_00922	I14.2.16B.59	16B	South Africa	4	Dorsal	I14	37.74	74.029	71.787	10.384	36.283	Training	Heated	Heated
923	JM	Silcrete_Reflection_00923	I14.2.16B.59	16B	South Africa	5	Ventral	I14	47.348	72.165	71.769	14.501	45.073	Training	Heated	Heated
924	JM	Silcrete_Reflection_00924	I14.2.16B.59	16B	South Africa	6	Ventral	I14	37.249	73.168	63.688	10.786	35.653	Training	Heated	Heated
925	JM	Silcrete_Reflection_00925	I14.2.16B.59	16B	South Africa	7	Ventral	I14	39.252	74.199	74.981	10.688	37.769	Training	Heated	Heated
926	JM	Silcrete_Reflection_00926	I14.2.16B.59	16B	South Africa	8	Ventral	I14	42.898	73.212	74.114	12.39	41.07	Training	Heated	Heated

## Sheet: CIELab k-NN_Dataset D
ID	Analyst	Processed Spectrum	Specimen Number	Nodule	Region	Scan	Side	Source	Chroma	Hue_Angle	L	A	B	Row role	Treatment	Model D_k=3 Predictions
1	SK	Silcrete_Reflection_00001	D9.1.10B.31	10B	South Africa	1	Dorsal	D9	14.958	65.783	44.215	6.136	13.641	Training	Heated	Heated
2	SK	Silcrete_Reflection_00002	D9.1.10B.31	10B	South Africa	2	Dorsal	D9	19.107	52.946	41.35	11.513	15.248	OUTLIER	Heated
3	SK	Silcrete_Reflection_00003	D9.1.10B.31	10B	South Africa	3	Dorsal	D9	19.667	54.777	50.807	11.343	16.066	Training	Heated	Heated
4	SK	Silcrete_Reflection_00004	D9.1.10B.31	10B	South Africa	4	Dorsal	D9	15.282	67.45	45.611	5.86	14.113	Training	Heated	Heated
5	SK	Silcrete_Reflection_00005	D9.1.10B.31	10B	South Africa	5	Ventral	D9	17.582	60.825	44.364	8.571	15.352	Training	Heated	Heated
6	SK	Silcrete_Reflection_00006	D9.1.10B.31	10B	South Africa	6	Ventral	D9	23.872	56.219	55.451	13.273	19.842	OUTLIER	Heated
7	SK	Silcrete_Reflection_00007	D9.1.10B.31	10B	South Africa	7	Ventral	D9	19.097	59.117	42.054	9.802	16.389	Training	Heated	Heated
8	SK	Silcrete_Reflection_00008	D9.1.10B.31	10B	South Africa	8	Ventral	D9	15.845	63.546	50.832	7.059	14.186	Training	Heated	Heated
9	SK	Silcrete_Reflection_00009	D9.1.10B.39	10B	South Africa	1	Dorsal	D9	15.845	63.546	50.832	7.059	14.186	Test	Heated	Heated
10	SK	Silcrete_Reflection_00010	D9.1.10B.39	10B	South Africa	2	Dorsal	D9	31.153	69.499	51.793	10.91	29.18	Test	Heated	Heated
11	SK	Silcrete_Reflection_00011	D9.1.10B.39	10B	South Africa	3	Dorsal	D9	38.337	74.549	71.932	10.213	36.952	Test	Heated	Heated
12	SK	Silcrete_Reflection_00012	D9.1.10B.39	10B	South Africa	4	Dorsal	D9	33.512	71.521	56.259	10.622	31.784	Test	Heated	Heated
13	SK	Silcrete_Reflection_00013	D9.1.10B.39	10B	South Africa	5	Ventral	D9	33.533	77.826	59.427	7.072	32.779	Test	Heated	Heated
14	SK	Silcrete_Reflection_00014	D9.1.10B.39	10B	South Africa	6	Ventral	D9	28.985	78.345	63.239	5.856	28.387	Test	Heated	Heated
15	SK	Silcrete_Reflection_00015	D9.1.10B.39	10B	South Africa	7	Ventral	D9	37.801	65.861	58.522	15.459	34.495	Test	Heated	Heated
16	SK	Silcrete_Reflection_00016	D9.1.10B.39	10B	South Africa	8	Ventral	D9	26.263	77.296	56.56	5.775	25.62	Test	Heated	Heated
17	JM	Silcrete_Reflection_00017	D9.1.12D.49	12D	South Africa	1	Dorsal	D9	25.689	86.325	58.184	1.647	25.636	Training	Heated	Unheated
18	JM	Silcrete_Reflection_00018	D9.1.12D.49	12D	South Africa	2	Dorsal	D9	29.997	83.427	65.088	3.434	29.8	Training	Heated	Unheated
19	JM	Silcrete_Reflection_00019	D9.1.12D.49	12D	South Africa	3	Dorsal	D9	23.734	83.831	52.842	2.55	23.596	Training	Heated	Heated
20	JM	Silcrete_Reflection_00020	D9.1.12D.49	12D	South Africa	4	Dorsal	D9	31.489	75.956	58.309	7.641	30.548	Training	Heated	Heated
21	JM	Silcrete_Reflection_00021	D9.1.12D.49	12D	South Africa	5	Ventral	D9	29.028	85.478	64.59	2.289	28.937	Training	Heated	Unheated
22	JM	Silcrete_Reflection_00022	D9.1.12D.49	12D	South Africa	6	Ventral	D9	33.238	65.115	42.523	13.987	30.152	Training	Heated	Heated
23	JM	Silcrete_Reflection_00023	D9.1.12D.49	12D	South Africa	7	Ventral	D9	27.801	82.649	62.257	3.557	27.573	Training	Heated	Unheated
24	JM	Silcrete_Reflection_00024	D9.1.12D.49	12D	South Africa	8	Ventral	D9	25.835	86.503	57.014	1.576	25.787	Training	Heated	Unheated
25	JM	Silcrete_Reflection_00025	D9.1.12D.50	12D	South Africa	1	Dorsal	D9	32.181	87.487	76.442	1.411	32.15	Training	Heated	Unheated
26	JM	Silcrete_Reflection_00026	D9.1.12D.50	12D	South Africa	2	Dorsal	D9	27.128	85.454	58.732	2.15	27.042	Training	Heated	Heated
27	JM	Silcrete_Reflection_00027	D9.1.12D.50	12D	South Africa	3	Dorsal	D9	35.169	68.859	54.139	12.684	32.802	Training	Heated	Heated
28	JM	Silcrete_Reflection_00028	D9.1.12D.50	12D	South Africa	4	Dorsal	D9	23.14	87.012	54.941	1.206	23.108	Training	Heated	Unheated
29	JM	Silcrete_Reflection_00029	D9.1.12D.50	12D	South Africa	5	Ventral	D9	36.348	70.915	55.672	11.885	34.351	Training	Heated	Heated
30	JM	Silcrete_Reflection_00030	D9.1.12D.50	12D	South Africa	6	Ventral	D9	41.35	77.528	73.969	8.93	40.375	Training	Heated	Heated
31	JM	Silcrete_Reflection_00031	D9.1.12D.50	12D	South Africa	7	Ventral	D9	27.512	78.91	57.224	5.292	26.999	Training	Heated	Heated
32	JM	Silcrete_Reflection_00032	D9.1.12D.50	12D	South Africa	8	Ventral	D9	30.755	84.1	66.6	3.161	30.593	Training	Heated	Unheated
33	SK	Silcrete_Reflection_00033	D9.1.12C.36	12C	South Africa	1	Dorsal	D9	26.349	85.682	64.912	1.984	26.274	Training	Unheated	Unheated
34	SK	Silcrete_Reflection_00034	D9.1.12C.36	12C	South Africa	2	Dorsal	D9	24.048	85.344	58.388	1.952	23.969	Training	Unheated	Unheated
35	SK	Silcrete_Reflection_00035	D9.1.12C.36	12C	South Africa	3	Dorsal	D9	24.049	85.181	57.981	2.02	23.964	Training	Unheated	Unheated
36	SK	Silcrete_Reflection_00036	D9.1.12C.36	12C	South Africa	4	Dorsal	D9	24.737	85.221	60.117	2.061	24.651	Training	Unheated	Unheated
37	SK	Silcrete_Reflection_00037	D9.1.12C.36	12C	South Africa	5	Ventral	D9	31.494	85.582	75.074	2.426	31.4	Training	Unheated	Unheated
38	SK	Silcrete_Reflection_00038	D9.1.12C.36	12C	South Africa	6	Ventral	D9	27.228	85.124	64.885	2.314	27.129	Training	Unheated	Unheated
39	SK	Silcrete_Reflection_00039	D9.1.12C.36	12C	South Africa	7	Ventral	D9	30.156	84.98	70.665	2.639	30.04	Training	Unheated	Unheated
40	SK	Silcrete_Reflection_00040	D9.1.12C.36	12C	South Africa	8	Ventral	D9	33.549	86.344	88.466	2.139	33.481	Training	Unheated	Unheated
41	SK	Silcrete_Reflection_00041	D9.1.12B.25	12B	South Africa	1	Dorsal	D9	13.144	60.221	42.104	6.528	11.408	Validation	Heated	Heated
42	SK	Silcrete_Reflection_00042	D9.1.12B.25	12B	South Africa	2	Dorsal	D9	12.743	57.683	37.354	6.812	10.769	OUTLIER	Heated
43	SK	Silcrete_Reflection_00043	D9.1.12B.25	12B	South Africa	3	Dorsal	D9	13.062	50.803	28.59	8.255	10.123	OUTLIER	Heated
44	SK	Silcrete_Reflection_00044	D9.1.12B.25	12B	South Africa	4	Dorsal	D9	12.522	77.839	56.172	2.638	12.241	Validation	Heated	Unheated
45	SK	Silcrete_Reflection_00045	D9.1.12B.25	12B	South Africa	5	Ventral	D9	16.646	52.58	37.479	10.115	13.22	OUTLIER	Heated
46	SK	Silcrete_Reflection_00046	D9.1.12B.25	12B	South Africa	6	Ventral	D9	16.307	71.48	53.499	5.18	15.463	Validation	Heated	Heated
47	SK	Silcrete_Reflection_00047	D9.1.12B.25	12B	South Africa	7	Ventral	D9	18.29	57.242	43.991	9.897	15.381	Validation	Heated	Heated
48	SK	Silcrete_Reflection_00048	D9.1.12B.25	12B	South Africa	8	Ventral	D9	19.633	57.13	48.291	10.655	16.49	Validation	Heated	Heated
49	SK	Silcrete_Reflection_00049	D9.1.10A.16	10A	South Africa	1	Dorsal	D9	16.057	84.78	67.843	1.461	15.991	OUTLIER	Unheated
50	SK	Silcrete_Reflection_00050	D9.1.10A.16	10A	South Africa	2	Dorsal	D9	9.39	83.659	55.281	1.037	9.333	Validation	Unheated	Unheated
51	SK	Silcrete_Reflection_00051	D9.1.10A.16	10A	South Africa	3	Dorsal	D9	11.485	83.308	46.957	1.338	11.407	Validation	Unheated	Unheated
52	SK	Silcrete_Reflection_00052	D9.1.10A.16	10A	South Africa	4	Dorsal	D9	14.044	81.434	53.834	2.092	13.887	Validation	Unheated	Unheated
53	SK	Silcrete_Reflection_00053	D9.1.10A.16	10A	South Africa	5	Ventral	D9	13.256	82.126	71.365	1.816	13.131	OUTLIER	Unheated
54	SK	Silcrete_Reflection_00054	D9.1.10A.16	10A	South Africa	6	Ventral	D9	10.476	87.406	57.519	0.474	10.465	Validation	Unheated	Unheated
55	SK	Silcrete_Reflection_00055	D9.1.10A.16	10A	South Africa	7	Ventral	D9	10.36	83.804	50.443	1.118	10.299	Validation	Unheated	Unheated
56	SK	Silcrete_Reflection_00056	D9.1.10A.16	10A	South Africa	8	Ventral	D9	15.752	81.502	54.084	2.328	15.579	Validation	Unheated	Unheated
57	SK	Silcrete_Reflection_00057	D9.1.12D.50	12D	South Africa	1	Dorsal	D9	9.643	74.237	53.536	2.62	9.281	Training	Heated	Unheated
58	SK	Silcrete_Reflection_00058	D9.1.12D.50	12D	South Africa	2	Dorsal	D9	5.787	81.476	34.455	0.858	5.724	OUTLIER	Heated
59	SK	Silcrete_Reflection_00059	D9.1.12D.50	12D	South Africa	3	Dorsal	D9	13.317	67.105	42.831	5.181	12.268	Training	Heated	Heated
60	SK	Silcrete_Reflection_00060	D9.1.12D.50	12D	South Africa	4	Dorsal	D9	8.792	72.527	38.522	2.64	8.386	OUTLIER	Heated
61	SK	Silcrete_Reflection_00061	D9.1.12D.50	12D	South Africa	5	Ventral	D9	14.212	69.083	49.034	5.074	13.275	Training	Heated	Heated
62	SK	Silcrete_Reflection_00062	D9.1.12D.50	12D	South Africa	6	Ventral	D9	18.03	68.34	51.533	6.655	16.757	Training	Heated	Heated
63	SK	Silcrete_Reflection_00063	D9.1.12D.50	12D	South Africa	7	Ventral	D9	7.406	81.878	45.984	1.046	7.332	Training	Heated	Unheated
64	SK	Silcrete_Reflection_00064	D9.1.12D.50	12D	South Africa	8	Ventral	D9	9.438	83.299	53.159	1.101	9.374	Training	Heated	Unheated
65	SK	Silcrete_Reflection_00065	D9.1.12C.8	12C	South Africa	1	Dorsal	D9	7.055	84.798	50.998	0.64	7.026	Training	Unheated	Unheated
66	SK	Silcrete_Reflection_00066	D9.1.12C.8	12C	South Africa	2	Dorsal	D9	9.226	86.21	55.971	0.61	9.206	Training	Unheated	Unheated
67	SK	Silcrete_Reflection_00067	D9.1.12C.8	12C	South Africa	3	Dorsal	D9	7.067	87.453	42.988	0.314	7.06	Training	Unheated	Unheated
68	SK	Silcrete_Reflection_00068	D9.1.12C.8	12C	South Africa	4	Dorsal	D9	10.437	83.183	44.692	1.239	10.363	Training	Unheated	Heated
69	SK	Silcrete_Reflection_00069	D9.1.12C.8	12C	South Africa	5	Ventral	D9	8.34	84.73	63.761	0.766	8.305	Training	Unheated	Unheated
70	SK	Silcrete_Reflection_00070	D9.1.12C.8	12C	South Africa	6	Ventral	D9	8.48	86.587	62.461	0.505	8.465	Training	Unheated	Unheated
71	SK	Silcrete_Reflection_00071	D9.1.12C.8	12C	South Africa	7	Ventral	D9	8.228	86.226	51.625	0.542	8.21	Training	Unheated	Unheated
72	SK	Silcrete_Reflection_00072	D9.1.12C.8	12C	South Africa	8	Ventral	D9	12.211	85.075	68.089	1.048	12.166	Training	Unheated	Unheated
73	SK	Silcrete_Reflection_00073	E3.1.1B.8	1B	South Africa	1	Dorsal	E3	17.346	44.321	25.224	12.41	12.119	Training	Heated	Heated
74	SK	Silcrete_Reflection_00074	E3.1.1B.8	1B	South Africa	2	Dorsal	E3	19.959	51.853	26.761	12.328	15.696	Training	Heated	Heated
75	SK	Silcrete_Reflection_00075	E3.1.1B.8	1B	South Africa	3	Dorsal	E3	17.864	47.579	22.417	12.05	13.187	Training	Heated	Heated
76	SK	Silcrete_Reflection_00076	E3.1.1B.8	1B	South Africa	4	Dorsal	E3	18.623	45.483	24.891	13.057	13.279	Training	Heated	Heated
77	SK	Silcrete_Reflection_00077	E3.1.1B.8	1B	South Africa	5	Ventral	E3	17.987	37.243	28.472	14.319	10.886	Training	Heated	Heated
78	SK	Silcrete_Reflection_00078	E3.1.1B.8	1B	South Africa	6	Ventral	E3	18.549	38.459	34.267	14.525	11.537	Training	Heated	Heated
79	SK	Silcrete_Reflection_00079	E3.1.1B.8	1B	South Africa	7	Ventral	E3	19.05	40.641	32.354	14.455	12.408	Training	Heated	Heated
80	SK	Silcrete_Reflection_00080	E3.1.1B.8	1B	South Africa	8	Ventral	E3	17.004	38.552	24.082	13.298	10.597	Training	Heated	Heated
81	JM	Silcrete_Reflection_00081	E3.1.1B.18	1B	South Africa	1	Dorsal	E3	33.333	49.344	40.531	21.717	25.287	Training	Heated	Heated
82	JM	Silcrete_Reflection_00082	E3.1.1B.18	1B	South Africa	2	Dorsal	E3	31.673	52.314	34.569	19.363	25.065	Training	Heated	Heated
83	JM	Silcrete_Reflection_00083	E3.1.1B.18	1B	South Africa	3	Dorsal	E3	31.865	54.418	36.33	18.541	25.915	Training	Heated	Heated
84	JM	Silcrete_Reflection_00084	E3.1.1B.18	1B	South Africa	4	Dorsal	E3	29.566	50.678	35.62	18.735	22.873	Training	Heated	Heated
85	JM	Silcrete_Reflection_00085	E3.1.1B.18	1B	South Africa	5	Ventral	E3	34.311	49.159	39.175	22.438	25.957	Training	Heated	Heated
86	JM	Silcrete_Reflection_00086	E3.1.1B.18	1B	South Africa	6	Ventral	E3	30.657	54.56	36.33	17.776	24.977	Training	Heated	Heated
87	JM	Silcrete_Reflection_00087	E3.1.1B.18	1B	South Africa	7	Ventral	E3	30.654	54.034	42.298	18.004	24.81	Training	Heated	Heated
88	JM	Silcrete_Reflection_00088	E3.1.1B.18	1B	South Africa	8	Ventral	E3	28.176	51.9	34.849	17.386	22.172	Training	Heated	Heated
89	JM	Silcrete_Reflection_00089	D9.1.12C.16	12C	South Africa	1	Dorsal	D9	30.236	86.691	78.683	1.745	30.185	Training	Unheated	Unheated
90	JM	Silcrete_Reflection_00090	D9.1.12C.16	12C	South Africa	2	Dorsal	D9	31.024	83.424	59.789	3.553	30.82	Training	Unheated	Unheated
91	JM	Silcrete_Reflection_00091	D9.1.12C.16	12C	South Africa	3	Dorsal	D9	29.348	86.123	72.131	1.984	29.281	Training	Unheated	Unheated
92	JM	Silcrete_Reflection_00092	D9.1.12C.16	12C	South Africa	4	Dorsal	D9	25.34	86.147	62.13	1.703	25.283	Training	Unheated	Unheated
93	JM	Silcrete_Reflection_00093	D9.1.12C.16	12C	South Africa	5	Ventral	D9	23.958	86.615	61.873	1.415	23.916	Training	Unheated	Unheated
94	JM	Silcrete_Reflection_00094	D9.1.12C.16	12C	South Africa	6	Ventral	D9	25.657	86.392	66.168	1.615	25.606	Training	Unheated	Unheated
95	JM	Silcrete_Reflection_00095	D9.1.12C.16	12C	South Africa	7	Ventral	D9	25.076	86.265	60.785	1.633	25.023	Training	Unheated	Unheated
96	JM	Silcrete_Reflection_00096	D9.1.12C.16	12C	South Africa	8	Ventral	D9	27.672	87.639	75.558	1.14	27.649	Training	Unheated	Unheated
97	SK	Silcrete_Reflection_00097	D9.1.12C.40	12c	South Africa	1	Dorsal	D9	26.12	86.674	64.507	1.516	26.076	Training	Unheated	Unheated
98	SK	Silcrete_Reflection_00098	D9.1.12C.40	12c	South Africa	2	Dorsal	D9	27.876	86.345	69.265	1.777	27.819	Training	Unheated	Unheated
99	SK	Silcrete_Reflection_00099	D9.1.12C.40	12c	South Africa	3	Dorsal	D9	26.614	86.201	64.961	1.763	26.556	Training	Unheated	Unheated
100	SK	Silcrete_Reflection_00100	D9.1.12C.40	12c	South Africa	4	Dorsal	D9	26.726	86.841	67.008	1.473	26.685	Training	Unheated	Unheated
101	SK	Silcrete_Reflection_00101	D9.1.12C.40	12c	South Africa	5	Ventral	D9	21.674	85.681	48.674	1.632	21.612	Training	Unheated	Heated
102	SK	Silcrete_Reflection_00102	D9.1.12C.40	12c	South Africa	6	Ventral	D9	24.25	85.494	59.695	1.905	24.175	Training	Unheated	Unheated
103	SK	Silcrete_Reflection_00103	D9.1.12C.40	12c	South Africa	7	Ventral	D9	26.084	85.586	63.229	2.007	26.007	Training	Unheated	Unheated
104	SK	Silcrete_Reflection_00104	D9.1.12C.40	12c	South Africa	8	Ventral	D9	26.905	86.255	66.948	1.757	26.847	Training	Unheated	Unheated
105	SK	Silcrete_Reflection_00105	E3.1.6C.4	6C	South Africa	1	Dorsal	E3	30.732	60.971	47.975	14.913	26.871	Training	Heated	Heated
106	SK	Silcrete_Reflection_00106	E3.1.6C.4	6C	South Africa	2	Dorsal	E3	30.411	68.087	61.151	11.349	28.214	Training	Heated	Heated
107	SK	Silcrete_Reflection_00107	E3.1.6C.4	6C	South Africa	3	Dorsal	E3	31.017	68.173	64.552	11.532	28.793	Training	Heated	Heated
108	SK	Silcrete_Reflection_00108	E3.1.6C.4	6C	South Africa	4	Dorsal	E3	38.333	56.972	48.177	20.894	32.138	Training	Heated	Heated
109	SK	Silcrete_Reflection_00109	E3.1.6C.4	6C	South Africa	5	Ventral	E3	38.075	60.711	38.66	18.627	33.207	Training	Heated	Heated
110	SK	Silcrete_Reflection_00110	E3.1.6C.4	6C	South Africa	6	Ventral	E3	33.857	61.487	54.936	16.162	29.751	Training	Heated	Heated
111	SK	Silcrete_Reflection_00111	E3.1.6C.4	6C	South Africa	7	Ventral	E3	47.349	52.755	49.053	28.656	37.692	Training	Heated	Heated
112	SK	Silcrete_Reflection_00112	E3.1.6C.4	6C	South Africa	8	Ventral	E3	51.83	58.763	60.116	26.878	44.316	Training	Heated	Heated
113	SK	Silcrete_Reflection_00113	E3.1.1B.27	1b	South Africa	1	Dorsal	E3	37.468	51.2	51.418	23.478	29.2	Test	Heated	Heated
114	SK	Silcrete_Reflection_00114	E3.1.1B.27	1b	South Africa	2	Dorsal	E3	30.982	53.2	40.785	18.559	24.808	Test	Heated	Heated
115	SK	Silcrete_Reflection_00115	E3.1.1B.27	1b	South Africa	3	Dorsal	E3	32.319	51.914	43.553	19.936	25.438	Test	Heated	Heated
116	SK	Silcrete_Reflection_00116	E3.1.1B.27	1b	South Africa	4	Dorsal	E3	30.243	51.478	36.766	18.836	23.661	Test	Heated	Heated
117	SK	Silcrete_Reflection_00117	E3.1.1B.27	1b	South Africa	5	Ventral	E3	36.937	52.275	49.234	22.601	29.216	Test	Heated	Heated
118	SK	Silcrete_Reflection_00118	E3.1.1B.27	1b	South Africa	6	Ventral	E3	35.292	54.477	42.027	20.505	28.723	Test	Heated	Heated
119	SK	Silcrete_Reflection_00119	E3.1.1B.27	1b	South Africa	7	Ventral	E3	31.326	54.436	42.168	18.219	25.482	Test	Heated	Heated
120	SK	Silcrete_Reflection_00120	E3.1.1B.27	1b	South Africa	8	Ventral	E3	31.507	50.973	39.471	19.839	24.476	Test	Heated	Heated
121	SK	Silcrete_Reflection_00121	E3.1.1B.37	1B	South Africa	1	Dorsal	E3	28.475	55.932	42.603	15.951	23.588	Training	Heated	Heated
122	SK	Silcrete_Reflection_00122	E3.1.1B.37	1B	South Africa	2	Dorsal	E3	31.815	55.256	45.766	18.131	26.143	Training	Heated	Heated
123	SK	Silcrete_Reflection_00123	E3.1.1B.37	1B	South Africa	3	Dorsal	E3	33.473	54.871	47.451	19.261	27.376	Training	Heated	Heated
123	SK	Silcrete_Reflection_00213	E3.1.1A.5	1A	South Africa	5	Ventral	E3	53.174	78.08	72.533	10.983	52.027	Training	Unheated	Unheated
124	SK	Silcrete_Reflection_00124	E3.1.1B.37	1B	South Africa	4	Dorsal	E3	26.027	54.368	36.233	15.163	21.154	Training	Heated	Heated
125	SK	Silcrete_Reflection_00125	E3.1.1B.37	1B	South Africa	5	Ventral	E3	28.176	53.622	35.258	16.712	22.686	Training	Heated	Heated
126	SK	Silcrete_Reflection_00126	E3.1.1B.37	1B	South Africa	6	Ventral	E3	32.292	56.424	47.432	17.859	26.905	Training	Heated	Heated
127	SK	Silcrete_Reflection_00127	E3.1.1B.37	1B	South Africa	7	Ventral	E3	34.678	53.902	47.879	20.432	28.02	Training	Heated	Heated
128	SK	Silcrete_Reflection_00128	E3.1.1B.37	1B	South Africa	8	Ventral	E3	33.547	51.825	42.611	20.734	26.372	Training	Heated	Heated
129	SK	Silcrete_Reflection_00129	I14.2.16A.17	16A	South Africa	1	Dorsal	I14	36.447	86.921	76.138	1.958	36.394	Training	Unheated	Unheated
130	SK	Silcrete_Reflection_00130	I14.2.16A.17	16A	South Africa	2	Dorsal	I14	44.916	84.573	75.97	4.248	44.714	Training	Unheated	Unheated
131	SK	Silcrete_Reflection_00131	I14.2.16A.17	16A	South Africa	3	Dorsal	I14	36.721	87.363	78.891	1.689	36.682	Training	Unheated	Unheated
132	SK	Silcrete_Reflection_00132	I14.2.16A.17	16A	South Africa	4	Dorsal	I14	44.732	84.659	76.192	4.164	44.538	Training	Unheated	Unheated
133	SK	Silcrete_Reflection_00133	I14.2.16A.17	16A	South Africa	5	Ventral	I14	45.858	83.599	77.351	5.113	45.572	Training	Unheated	Unheated
134	SK	Silcrete_Reflection_00134	I14.2.16A.17	16A	South Africa	6	Ventral	I14	35.994	86.225	73.361	2.37	35.916	Training	Unheated	Unheated
135	SK	Silcrete_Reflection_00135	I14.2.16A.17	16A	South Africa	7	Ventral	I14	35.158	86.228	67.95	2.313	35.082	Training	Unheated	Unheated
136	SK	Silcrete_Reflection_00136	I14.2.16A.17	16A	South Africa	8	Ventral	I14	37.813	88.214	89.437	1.179	37.794	Training	Unheated	Unheated
137	SK	Silcrete_Reflection_00137	I14.2.16B.5	16B	South Africa	1	Dorsal	I14	34.555	78.776	66.364	6.726	33.894	Training	Heated	Heated
138	SK	Silcrete_Reflection_00138	I14.2.16B.5	16B	South Africa	2	Dorsal	I14	32.326	77.65	57.577	6.914	31.578	Training	Heated	Heated
139	SK	Silcrete_Reflection_00139	I14.2.16B.5	16B	South Africa	3	Dorsal	I14	31.311	77.868	55.333	6.581	30.612	Training	Heated	Heated
140	SK	Silcrete_Reflection_00140	I14.2.16B.5	16B	South Africa	4	Dorsal	I14	36.574	76.487	68.169	8.546	35.562	Training	Heated	Heated
141	SK	Silcrete_Reflection_00141	I14.2.16B.5	16B	South Africa	5	Ventral	I14	41.279	82.302	78.246	5.529	40.907	Training	Heated	Unheated
142	SK	Silcrete_Reflection_00142	I14.2.16B.5	16B	South Africa	6	Ventral	I14	44.71	82.475	80.701	5.855	44.325	Training	Heated	Unheated
143	SK	Silcrete_Reflection_00143	I14.2.16B.5	16B	South Africa	7	Ventral	I14	30.035	78.927	55.101	5.768	29.476	Training	Heated	Heated
144	SK	Silcrete_Reflection_00144	I14.2.16B.5	16B	South Africa	8	Ventral	I14	30.767	77.546	51.664	6.635	30.043	Training	Heated	Heated
145	SK	Silcrete_Reflection_00145	I14.2.16A.18	16A	South Africa	1	Dorsal	I14	37.992	83.761	64.96	4.129	37.767	Test	Unheated	Unheated
146	SK	Silcrete_Reflection_00146	I14.2.16A.18	16A	South Africa	2	Dorsal	I14	32.033	88.15	74.191	1.034	32.016	Test	Unheated	Unheated
147	SK	Silcrete_Reflection_00147	I14.2.16A.18	16A	South Africa	3	Dorsal	I14	39.625	84.25	69.163	3.97	39.425	Test	Unheated	Unheated
148	SK	Silcrete_Reflection_00148	I14.2.16A.18	16A	South Africa	4	Dorsal	I14	40.294	84.281	71.895	4.015	40.093	Test	Unheated	Unheated
149	SK	Silcrete_Reflection_00149	I14.2.16A.18	16A	South Africa	5	Ventral	I14	38.999	96.492	96.811	-4.409	38.749	OUTLIER	Unheated
150	SK	Silcrete_Reflection_00150	I14.2.16A.18	16A	South Africa	6	Ventral	I14	37.26	86.869	77.481	2.035	37.205	Test	Unheated	Unheated
151	SK	Silcrete_Reflection_00151	I14.2.16A.18	16A	South Africa	7	Ventral	I14	35.303	88.08	81.665	1.183	35.284	Test	Unheated	Unheated
152	SK	Silcrete_Reflection_00152	I14.2.16A.18	16A	South Africa	8	Ventral	I14	40.162	88.475	92.051	1.069	40.147	OUTLIER	Unheated
153	JM	Silcrete_Reflection_00153	I14.2.16B.8	16B	South Africa	1	Dorsal	I14	51.972	75.847	77.799	12.708	50.394	Training	Heated	Heated
154	JM	Silcrete_Reflection_00154	I14.2.16B.8	16B	South Africa	2	Dorsal	I14	33.335	81.298	58.64	5.043	32.952	Training	Heated	Heated
155	JM	Silcrete_Reflection_00155	I14.2.16B.8	16B	South Africa	3	Dorsal	I14	43.095	79.682	71.417	7.719	42.398	Training	Heated	Unheated
156	JM	Silcrete_Reflection_00156	I14.2.16B.8	16B	South Africa	4	Dorsal	I14	43.369	82.924	76.877	5.342	43.039	Training	Heated	Unheated
157	JM	Silcrete_Reflection_00157	I14.2.16B.8	16B	South Africa	5	Ventral	I14	36.823	82.476	71.835	4.821	36.506	Training	Heated	Unheated
158	JM	Silcrete_Reflection_00158	I14.2.16B.8	16B	South Africa	6	Ventral	I14	35.172	82.387	65.808	4.66	34.862	Training	Heated	Unheated
159	JM	Silcrete_Reflection_00159	I14.2.16B.8	16B	South Africa	7	Ventral	I14	44.287	80.259	75.589	7.493	43.649	Training	Heated	Heated
160	JM	Silcrete_Reflection_00160	I14.2.16B.8	16B	South Africa	8	Ventral	I14	36.383	81.782	66.192	5.201	36.009	Training	Heated	Unheated
161	JM	Silcrete_Reflection_00161	I14.2.16A.20	16A	South Africa	1	Dorsal	I14	38.102	82.553	63.315	4.939	37.781	Training	Unheated	Heated
162	JM	Silcrete_Reflection_00162	I14.2.16A.20	16A	South Africa	2	Dorsal	I14	33.155	87.006	67.89	1.731	33.11	Training	Unheated	Unheated
163	JM	Silcrete_Reflection_00163	I14.2.16A.20	16A	South Africa	3	Dorsal	I14	27.762	88.125	65.382	0.908	27.747	Training	Unheated	Unheated
164	JM	Silcrete_Reflection_00164	I14.2.16A.20	16A	South Africa	4	Dorsal	I14	24.903	87.168	55.793	1.23	24.872	Training	Unheated	Unheated
165	JM	Silcrete_Reflection_00165	I14.2.16A.20	16A	South Africa	5	Ventral	I14	41.432	85.043	77.094	3.58	41.277	Training	Unheated	Unheated
166	JM	Silcrete_Reflection_00166	I14.2.16A.20	16A	South Africa	6	Ventral	I14	41.601	85.563	79.301	3.219	41.476	Training	Unheated	Unheated
167	JM	Silcrete_Reflection_00167	I14.2.16A.20	16A	South Africa	7	Ventral	I14	37.151	87.918	89.34	1.35	37.126	Training	Unheated	Unheated
168	JM	Silcrete_Reflection_00168	I14.2.16A.20	16A	South Africa	8	Ventral	I14	36.842	86.548	76.105	2.219	36.775	Training	Unheated	Unheated
169	JM	Silcrete_Reflection_00169	E3.1.6B.19	6B	South Africa	1	Dorsal	E3	41.362	60.081	62.311	20.631	35.85	Training	Unheated	Unheated
170	JM	Silcrete_Reflection_00170	E3.1.6B.19	6B	South Africa	2	Dorsal	E3	38.294	58.163	54.51	20.201	32.533	Training	Unheated	Heated
171	JM	Silcrete_Reflection_00171	E3.1.6B.19	6B	South Africa	3	Dorsal	E3	43.23	56.773	61.023	23.688	36.162	Training	Unheated	Unheated
172	JM	Silcrete_Reflection_00172	E3.1.6B.19	6B	South Africa	4	Dorsal	E3	45.002	55.568	57.643	25.446	37.118	Training	Unheated	Unheated
173	JM	Silcrete_Reflection_00173	E3.1.6B.19	6B	South Africa	5	Ventral	E3	47.602	58.746	61.789	24.697	40.694	Training	Unheated	Heated
174	JM	Silcrete_Reflection_00174	E3.1.6B.19	6B	South Africa	6	Ventral	E3	49.545	61.173	70.878	23.889	43.406	Training	Unheated	Unheated
175	JM	Silcrete_Reflection_00175	E3.1.6B.19	6B	South Africa	7	Ventral	E3	44.035	59.903	62.088	22.082	38.098	Training	Unheated	Unheated
176	JM	Silcrete_Reflection_00176	E3.1.6B.19	6B	South Africa	8	Ventral	E3	44.154	61.046	65.724	21.376	38.635	Training	Unheated	Unheated
177	JM	Silcrete_Reflection_00177	I14.2.16B.43	16B	South Africa	1	Dorsal	I14	33.655	74.606	54.921	8.934	32.448	Training	Heated	Heated
178	JM	Silcrete_Reflection_00178	I14.2.16B.43	16B	South Africa	2	Dorsal	I14	47.589	71.573	73.528	15.043	45.149	Training	Heated	Heated
179	JM	Silcrete_Reflection_00179	I14.2.16B.43	16B	South Africa	3	Dorsal	I14	35.233	73.467	52.954	10.026	33.776	Training	Heated	Heated
180	JM	Silcrete_Reflection_00180	I14.2.16B.43	16B	South Africa	4	Dorsal	I14	28.318	75.851	54.235	6.922	27.459	Training	Heated	Heated
181	JM	Silcrete_Reflection_00181	I14.2.16B.43	16B	South Africa	5	Ventral	I14	49.507	76.364	82.91	11.671	48.112	OUTLIER	Heated
182	JM	Silcrete_Reflection_00182	I14.2.16B.43	16B	South Africa	6	Ventral	I14	51.235	73.247	79.185	14.768	49.06	Training	Heated	Heated
183	JM	Silcrete_Reflection_00183	I14.2.16B.43	16B	South Africa	7	Ventral	I14	46.682	74.228	75.119	12.689	44.924	Training	Heated	Heated
184	JM	Silcrete_Reflection_00184	I14.2.16B.43	16B	South Africa	8	Ventral	I14	29.804	81.728	71.917	4.288	29.494	Training	Heated	Unheated
185	JM	Silcrete_Reflection_00185	I14.2.16A.24	16A	South Africa	1	Dorsal	I14	34.144	82.083	62.366	4.703	33.819	Training	Unheated	Unheated
186	JM	Silcrete_Reflection_00186	I14.2.16A.24	16A	South Africa	2	Dorsal	I14	39.127	82.369	70.05	5.196	38.781	Training	Unheated	Unheated
187	JM	Silcrete_Reflection_00187	I14.2.16A.24	16A	South Africa	3	Dorsal	I14	38.363	82.789	69.089	4.815	38.06	Training	Unheated	Unheated
188	JM	Silcrete_Reflection_00188	I14.2.16A.24	16A	South Africa	4	Dorsal	I14	40.029	83.637	76.294	4.436	39.782	Training	Unheated	Unheated
189	JM	Silcrete_Reflection_00189	I14.2.16A.24	16A	South Africa	5	Ventral	I14	45.443	82.946	84.635	5.581	45.098	Training	Unheated	Heated
190	JM	Silcrete_Reflection_00190	I14.2.16A.24	16A	South Africa	6	Ventral	I14	33.176	86.016	82.289	2.305	33.095	Training	Unheated	Unheated
191	JM	Silcrete_Reflection_00191	I14.2.16A.24	16A	South Africa	7	Ventral	I14	35.65	88.671	94.053	0.827	35.64	OUTLIER	Unheated
192	JM	Silcrete_Reflection_00192	I14.2.16A.24	16A	South Africa	8	Ventral	I14	41.74	83.54	82.94	4.696	41.475	Training	Unheated	Unheated
193	JM	Silcrete_Reflection_00193	I14.2.16B.50	16B	South Africa	1	Dorsal	I14	28.123	81.344	59.599	4.232	27.803	Validation	Heated	Heated
194	JM	Silcrete_Reflection_00194	I14.2.16B.50	16B	South Africa	2	Dorsal	I14	33.379	81.635	87.842	4.856	33.024	Validation	Heated	Unheated
195	JM	Silcrete_Reflection_00195	I14.2.16B.50	16B	South Africa	3	Dorsal	I14	33.715	79.984	74.427	5.864	33.201	Validation	Heated	Heated
196	JM	Silcrete_Reflection_00196	I14.2.16B.50	16B	South Africa	4	Dorsal	I14	35.39	76.233	62.701	8.422	34.373	Validation	Heated	Heated
197	JM	Silcrete_Reflection_00197	I14.2.16B.50	16B	South Africa	5	Ventral	I14	33.623	81.168	70.608	5.163	33.225	Validation	Heated	Heated
198	JM	Silcrete_Reflection_00198	I14.2.16B.50	16B	South Africa	6	Ventral	I14	34.46	77.717	61.749	7.331	33.671	Validation	Heated	Heated
199	JM	Silcrete_Reflection_00199	I14.2.16B.50	16B	South Africa	7	Ventral	I14	41.72	79.557	79.497	7.562	41.029	Validation	Heated	Unheated
200	JM	Silcrete_Reflection_00200	I14.2.16B.50	16B	South Africa	8	Ventral	I14	39.06	79.697	76.532	6.986	38.43	Validation	Heated	Heated
201	JM	Silcrete_Reflection_00201	I14.2.16A.9	16A	South Africa	1	Dorsal	I14	35.949	86.265	89.091	2.341	35.872	Training	Unheated	Unheated
202	JM	Silcrete_Reflection_00202	I14.2.16A.9	16A	South Africa	2	Dorsal	I14	31.143	83.362	60.182	3.6	30.934	Training	Unheated	Unheated
203	JM	Silcrete_Reflection_00203	I14.2.16A.9	16A	South Africa	3	Dorsal	I14	31.308	85.491	72.491	2.461	31.211	Training	Unheated	Unheated
204	JM	Silcrete_Reflection_00204	I14.2.16A.9	16A	South Africa	4	Dorsal	I14	26.119	85.792	62.283	1.916	26.049	Training	Unheated	Unheated
205	JM	Silcrete_Reflection_00205	I14.2.16A.9	16A	South Africa	5	Ventral	I14	43.305	83.242	79.163	5.096	43.004	Training	Unheated	Unheated
206	JM	Silcrete_Reflection_00206	I14.2.16A.9	16A	South Africa	6	Ventral	I14	35.838	85.558	87.125	2.775	35.73	Training	Unheated	Unheated
207	JM	Silcrete_Reflection_00207	I14.2.16A.9	16A	South Africa	7	Ventral	I14	33.411	85.146	77.077	2.827	33.291	Training	Unheated	Unheated
208	JM	Silcrete_Reflection_00208	I14.2.16A.9	16A	South Africa	8	Ventral	I14	31.427	85.171	74.707	2.646	31.316	Training	Unheated	Unheated
209	SK	Silcrete_Reflection_00209	E3.1.1A.5	1A	South Africa	1	Dorsal	E3	56.068	78.577	75.14	11.105	54.957	Training	Unheated	Unheated
210	SK	Silcrete_Reflection_00210	E3.1.1A.5	1A	South Africa	2	Dorsal	E3	46.366	78.324	63.433	9.384	45.406	Training	Unheated	Unheated
211	SK	Silcrete_Reflection_00211	E3.1.1A.5	1A	South Africa	3	Dorsal	E3	51.851	78.941	76.129	9.946	50.888	Training	Unheated	Unheated
212	SK	Silcrete_Reflection_00212	E3.1.1A.5	1A	South Africa	4	Dorsal	E3	49.045	77.232	66.418	10.839	47.832	Training	Unheated	Unheated
214	SK	Silcrete_Reflection_00214	E3.1.1A.5	1A	South Africa	6	Ventral	E3	50.08	77.662	66.747	10.701	48.923	Training	Unheated	Unheated
215	SK	Silcrete_Reflection_00215	E3.1.1A.5	1A	South Africa	7	Ventral	E3	50.962	75.845	61.326	12.463	49.415	Training	Unheated	Unheated
216	SK	Silcrete_Reflection_00216	E3.1.1A.5	1A	South Africa	8	Ventral	E3	51.113	79.175	73.622	9.6	50.204	Training	Unheated	Unheated
217	SK	Silcrete_Reflection_00217	I14.2.16E.31	16B	South Africa	1	Dorsal	I14	37.417	82.422	83.408	4.934	37.09	Training	Heated	Unheated
218	SK	Silcrete_Reflection_00218	I14.2.16E.31	16B	South Africa	2	Dorsal	I14	31.591	80.995	51.287	4.944	31.202	Training	Heated	Heated
219	SK	Silcrete_Reflection_00219	I14.2.16E.31	16B	South Africa	3	Dorsal	I14	37.199	80.973	74.257	5.836	36.739	Training	Heated	Heated
220	SK	Silcrete_Reflection_00220	I14.2.16E.31	16B	South Africa	4	Dorsal	I14	30.032	79.371	54.716	5.54	29.517	Training	Heated	Heated
221	SK	Silcrete_Reflection_00221	I14.2.16E.31	16B	South Africa	5	Ventral	I14	30.588	76.159	48.41	7.317	29.7	Training	Heated	Heated
222	SK	Silcrete_Reflection_00222	I14.2.16E.31	16B	South Africa	6	Ventral	I14	39.744	80.802	70.679	6.353	39.233	Training	Heated	Unheated
223	SK	Silcrete_Reflection_00223	I14.2.16E.31	16B	South Africa	7	Ventral	I14	53.647	75.397	76.731	13.525	51.914	Training	Heated	Heated
224	SK	Silcrete_Reflection_00224	I14.2.16E.31	16B	South Africa	8	Ventral	I14	39.184	81.97	63.806	5.474	38.8	Training	Heated	Unheated
225	SK	Silcrete_Reflection_00225	I14.2.16E.6	16B	South Africa	1	Dorsal	I14	40.247	78.025	66.338	8.351	39.371	Training	Heated	Heated
226	SK	Silcrete_Reflection_00226	I14.2.16E.6	16B	South Africa	2	Dorsal	I14	32.408	81.337	59.427	4.881	32.039	Training	Heated	Heated
227	SK	Silcrete_Reflection_00227	I14.2.16E.6	16B	South Africa	3	Dorsal	I14	38.658	76.667	61.117	8.915	37.616	Training	Heated	Unheated
228	SK	Silcrete_Reflection_00228	I14.2.16E.6	16B	South Africa	4	Dorsal	I14	33.189	79.639	55.124	5.969	32.648	Training	Heated	Heated
229	SK	Silcrete_Reflection_00229	I14.2.16E.6	16B	South Africa	5	Ventral	I14	35.4	80.548	63.433	5.813	34.919	Training	Heated	Unheated
230	SK	Silcrete_Reflection_00230	I14.2.16E.6	16B	South Africa	6	Ventral	I14	40.436	82.516	83.647	5.267	40.091	Training	Heated	Unheated
231	SK	Silcrete_Reflection_00231	I14.2.16E.6	16B	South Africa	7	Ventral	I14	43.258	83.28	69.311	5.062	42.961	Training	Heated	Unheated
232	SK	Silcrete_Reflection_00232	I14.2.16E.6	16B	South Africa	8	Ventral	I14	36.187	78.3	65.135	7.338	35.436	Training	Heated	Heated
233	SK	Silcrete_Reflection_00233	E3.1.6B.21	6B	South Africa	1	Dorsal	E3	48.76	63.597	70.478	21.683	43.674	Training	Unheated	Heated
234	SK	Silcrete_Reflection_00234	E3.1.6B.21	6B	South Africa	2	Dorsal	E3	47.79	60.169	63.267	23.773	41.458	Training	Unheated	Unheated
235	SK	Silcrete_Reflection_00235	E3.1.6B.21	6B	South Africa	3	Dorsal	E3	50.377	61.54	59.277	24.007	44.289	Training	Unheated	Heated
236	SK	Silcrete_Reflection_00236	E3.1.6B.21	6B	South Africa	4	Dorsal	E3	45.845	64.709	63.043	19.586	41.45	Training	Unheated	Unheated
237	SK	Silcrete_Reflection_00237	E3.1.6B.21	6B	South Africa	5	Ventral	E3	41.536	63.115	51.885	18.783	37.047	Training	Unheated	Heated
238	SK	Silcrete_Reflection_00238	E3.1.6B.21	6B	South Africa	6	Ventral	E3	54.347	59.536	66.923	27.554	46.845	Training	Unheated	Unheated
239	SK	Silcrete_Reflection_00239	E3.1.6B.21	6B	South Africa	7	Ventral	E3	54.475	62.455	72.72	25.192	48.301	OUTLIER	Unheated
240	SK	Silcrete_Reflection_00240	E3.1.6B.21	6B	South Africa	8	Ventral	E3	43.048	59.831	47.988	21.634	37.217	Training	Unheated	Heated
241	JM	Silcrete_Reflection_00241	E3.1.5N.7	5N	South Africa	1	Dorsal	E3	32.481	84.46	69.959	3.135	32.329	Training	Unheated	Unheated
242	JM	Silcrete_Reflection_00242	E3.1.5N.7	5N	South Africa	2	Dorsal	E3	28.392	84.803	63.784	2.572	28.275	Training	Unheated	Heated
243	JM	Silcrete_Reflection_00243	E3.1.5N.7	5N	South Africa	3	Dorsal	E3	30.475	84.238	65.826	3.059	30.321	Training	Unheated	Heated
244	JM	Silcrete_Reflection_00244	E3.1.5N.7	5N	South Africa	4	Dorsal	E3	32.271	82.526	64.015	4.198	31.996	Training	Unheated	Heated
245	JM	Silcrete_Reflection_00245	E3.1.5N.7	5N	South Africa	5	Ventral	E3	29.48	84.823	65.764	2.66	29.36	Training	Unheated	Unheated
246	JM	Silcrete_Reflection_00246	E3.1.5N.7	5N	South Africa	6	Ventral	E3	39.567	83.836	81.138	4.249	39.339	Training	Unheated	Unheated
247	JM	Silcrete_Reflection_00247	E3.1.5N.7	5N	South Africa	7	Ventral	E3	29.404	83.048	58.306	3.559	29.188	Training	Unheated	Unheated
248	JM	Silcrete_Reflection_00248	E3.1.5N.7	5N	South Africa	8	Ventral	E3	32.175	84.248	77.159	3.225	32.013	Training	Unheated	Unheated
249	ET	Silcrete_Reflection_00249	E3.1.5N.23	5N	South Africa	1	Dorsal	E3	28.619	84.201	62.388	2.891	28.472	Test	Unheated	Unheated
250	ET	Silcrete_Reflection_00250	E3.1.5N.23	5N	South Africa	2	Dorsal	E3	26.771	84.031	55.128	2.784	26.626	Test	Unheated	Heated
251	ET	Silcrete_Reflection_00251	E3.1.5N.23	5N	South Africa	3	Dorsal	E3	29.714	85.397	70.62	2.385	29.618	Test	Unheated	Unheated
252	ET	Silcrete_Reflection_00252	E3.1.5N.23	5N	South Africa	4	Dorsal	E3	32.359	84.941	70.797	2.853	32.233	Test	Unheated	Unheated
253	ET	Silcrete_Reflection_00253	E3.1.5N.23	5N	South Africa	5	Ventral	E3	31.938	85.284	75.937	2.626	31.83	Test	Unheated	Unheated
254	ET	Silcrete_Reflection_00254	E3.1.5N.23	5N	South Africa	6	Ventral	E3	33.991	85.199	73.578	2.845	33.872	Test	Unheated	Unheated
255	ET	Silcrete_Reflection_00255	E3.1.5N.23	5N	South Africa	7	Ventral	E3	41.369	83.369	77.536	4.777	41.093	Test	Unheated	Unheated
256	ET	Silcrete_Reflection_00256	E3.1.5N.23	5N	South Africa	8	Ventral	E3	26.821	84.808	61.113	2.427	26.711	Test	Unheated	Unheated
257	ET	Silcrete_Reflection_00257	E3.1.1B.2	1B	South Africa	1	Dorsal	E3	31.814	48.261	30.146	21.18	23.739	OUTLIER	Heated
258	ET	Silcrete_Reflection_00258	E3.1.1B.2	1B	South Africa	2	Dorsal	E3	27.464	51.07	30.277	17.258	21.365	Training	Heated	Heated
259	ET	Silcrete_Reflection_00259	E3.1.1B.2	1B	South Africa	3	Dorsal	E3	21.929	54.73	25.095	12.663	17.904	OUTLIER	Heated
260	ET	Silcrete_Reflection_00260	E3.1.1B.2	1B	South Africa	4	Dorsal	E3	38.67	56.508	38.869	21.339	32.249	Training	Heated	Heated
261	ET	Silcrete_Reflection_00261	E3.1.1B.2	1B	South Africa	5	Ventral	E3	36.781	44.658	35.283	26.163	25.852	OUTLIER	Heated
262	ET	Silcrete_Reflection_00262	E3.1.1B.2	1B	South Africa	6	Ventral	E3	36.559	46.469	32.022	25.18	26.505	OUTLIER	Heated
263	ET	Silcrete_Reflection_00263	E3.1.1B.2	1B	South Africa	7	Ventral	E3	37.422	56.809	38.748	20.486	31.316	Training	Heated	Heated
264	ET	Silcrete_Reflection_00264	E3.1.1B.2	1B	South Africa	8	Ventral	E3	38.285	55.616	41.447	21.621	31.595	Training	Heated	Heated
265	ET	Silcrete_Reflection_00265	E3.1.1B.10	1B	South Africa	1	Dorsal	E3	34.998	53.773	42.023	20.684	28.233	Training	Heated	Heated
266	ET	Silcrete_Reflection_00266	E3.1.1B.10	1B	South Africa	2	Dorsal	E3	31.275	48.624	42.688	20.673	23.468	Training	Heated	Heated
267	ET	Silcrete_Reflection_00267	E3.1.1B.10	1B	South Africa	3	Dorsal	E3	29.582	55.667	32.377	16.684	24.428	Training	Heated	Heated
268	ET	Silcrete_Reflection_00268	E3.1.1B.10	1B	South Africa	4	Dorsal	E3	32.731	58.766	39.521	16.972	27.986	Training	Heated	Heated
269	ET	Silcrete_Reflection_00269	E3.1.1B.10	1B	South Africa	5	Ventral	E3	34.744	54.965	39.976	19.945	28.448	Training	Heated	Heated
270	ET	Silcrete_Reflection_00270	E3.1.1B.10	1B	South Africa	6	Ventral	E3	39.935	55.568	41.589	22.58	32.938	Training	Heated	Heated
271	ET	Silcrete_Reflection_00271	E3.1.1B.10	1B	South Africa	7	Ventral	E3	31.245	51.768	42.484	19.336	24.543	Training	Heated	Heated
272	ET	Silcrete_Reflection_00272	E3.1.1B.10	1B	South Africa	8	Ventral	E3	33.238	51.131	43.273	20.859	25.879	Training	Heated	Heated
273	ET	Silcrete_Reflection_00273	E3.1.5N.43	5N	South Africa	1	Dorsal	E3	30.419	84.228	61.922	3.059	30.264	Validation	Unheated	Unheated
274	ET	Silcrete_Reflection_00274	E3.1.5N.43	5N	South Africa	2	Dorsal	E3	33.455	84.972	75.91	2.932	33.326	Validation	Unheated	Unheated
275	ET	Silcrete_Reflection_00275	E3.1.5N.43	5N	South Africa	3	Dorsal	E3	33.026	84.459	72.741	3.189	32.872	Validation	Unheated	Unheated
276	ET	Silcrete_Reflection_00276	E3.1.5N.43	5N	South Africa	4	Dorsal	E3	33.228	86.084	80.382	2.269	33.15	Validation	Unheated	Unheated
277	ET	Silcrete_Reflection_00277	E3.1.5N.43	5N	South Africa	5	Ventral	E3	35.315	83.021	68.147	4.291	35.053	Validation	Unheated	Unheated
278	ET	Silcrete_Reflection_00278	E3.1.5N.43	5N	South Africa	6	Ventral	E3	36.822	82.707	69.552	4.674	36.524	Validation	Unheated	Unheated
279	ET	Silcrete_Reflection_00279	E3.1.5N.43	5N	South Africa	7	Ventral	E3	33.548	86.176	74.384	2.237	33.473	Validation	Unheated	Unheated
280	ET	Silcrete_Reflection_00280	E3.1.5N.43	5N	South Africa	8	Ventral	E3	30.904	85.865	70.849	2.228	30.823	Validation	Unheated	Unheated
281	SK	Silcrete_Reflection_00281	D9.1.12C.11	12C	South Africa	1	Dorsal	D9	29.24	88.006	72.303	1.018	29.223	Training	Unheated	Unheated
282	SK	Silcrete_Reflection_00282	D9.1.12C.11	12C	South Africa	2	Dorsal	D9	24.893	86.641	58.85	1.459	24.85	Training	Unheated	Unheated
283	SK	Silcrete_Reflection_00283	D9.1.12C.11	12C	South Africa	3	Dorsal	D9	26.759	87.208	63.288	1.303	26.727	Training	Unheated	Unheated
284	SK	Silcrete_Reflection_00284	D9.1.12C.11	12C	South Africa	4	Dorsal	D9	28.514	86.832	66.507	1.576	28.47	Training	Unheated	Unheated
285	SK	Silcrete_Reflection_00285	D9.1.12C.11	12C	South Africa	5	Ventral	D9	29.146	87.42	72.188	1.312	29.117	Training	Unheated	Unheated
286	SK	Silcrete_Reflection_00286	D9.1.12C.11	12C	South Africa	6	Ventral	D9	24.783	85.827	56.932	1.803	24.717	Training	Unheated	Unheated
287	SK	Silcrete_Reflection_00287	D9.1.12C.11	12C	South Africa	7	Ventral	D9	25.076	86.683	55.726	1.451	25.034	Training	Unheated	Unheated
288	SK	Silcrete_Reflection_00288	D9.1.12C.11	12C	South Africa	8	Ventral	D9	34.337	87.894	88.04	1.262	34.314	Training	Unheated	Unheated
289	SK	Silcrete_Reflection_00289	D9.1.12C.30	12C	South Africa	1	Dorsal	D9	37.935	85.745	78.861	2.815	37.83	Training	Unheated	Unheated
290	SK	Silcrete_Reflection_00290	D9.1.12C.30	12C	South Africa	2	Dorsal	D9	31.301	87.864	76.638	1.167	31.279	Training	Unheated	Unheated
291	SK	Silcrete_Reflection_00291	D9.1.12C.30	12C	South Africa	3	Dorsal	D9	33.408	88.45	83.121	0.903	33.396	Training	Unheated	Unheated
292	SK	Silcrete_Reflection_00292	D9.1.12C.30	12C	South Africa	4	Dorsal	D9	26.031	87.636	62.735	1.074	26.009	Training	Unheated	Unheated
293	SK	Silcrete_Reflection_00293	D9.1.12C.30	12C	South Africa	5	Ventral	D9	30.257	87.5	70.636	1.32	30.229	Training	Unheated	Unheated
294	SK	Silcrete_Reflection_00294	D9.1.12C.30	12C	South Africa	6	Ventral	D9	33.773	87.31	78.63	1.585	33.735	Training	Unheated	Unheated
295	SK	Silcrete_Reflection_00295	D9.1.12C.30	12C	South Africa	7	Ventral	D9	31.237	88.319	76.263	0.917	31.224	Training	Unheated	Unheated
296	SK	Silcrete_Reflection_00296	D9.1.12C.30	12C	South Africa	8	Ventral	D9	30.16	88.914	73.687	0.571	30.154	Training	Unheated	Unheated
297	SK	Silcrete_Reflection_00297	D9.1.10B.6A	10B	South Africa	1	Dorsal	D9	30.426	72.351	55.724	9.225	28.994	Training	Heated	Heated
298	SK	Silcrete_Reflection_00298	D9.1.10B.6A	10B	South Africa	2	Dorsal	D9	42.409	59.329	52.458	21.633	36.476	Training	Heated	Heated
299	SK	Silcrete_Reflection_00299	D9.1.10B.6A	10B	South Africa	3	Dorsal	D9	32.187	60.061	42.018	16.064	27.891	Training	Heated	Heated
300	SK	Silcrete_Reflection_00300	D9.1.10B.6A	10B	South Africa	4	Dorsal	D9	35.003	70.483	57.275	11.694	32.992	Training	Heated	Heated
301	SK	Silcrete_Reflection_00301	D9.1.10B.6A	10B	South Africa	5	Ventral	D9	34.43	66.682	51.402	13.629	31.618	Training	Heated	Heated
302	SK	Silcrete_Reflection_00302	D9.1.10B.6A	10B	South Africa	6	Ventral	D9	35.89	67.278	53.406	13.863	33.104	Training	Heated	Heated
303	SK	Silcrete_Reflection_00303	D9.1.10B.6A	10B	South Africa	7	Ventral	D9	29.192	64.42	46.312	12.605	26.331	Training	Heated	Heated
304	SK	Silcrete_Reflection_00304	D9.1.10B.6A	10B	South Africa	8	Ventral	D9	40.901	70.713	63.348	13.51	38.605	Training	Heated	Heated
305	SK	Silcrete_Reflection_00305	D9.1.10B.6B	10B	South Africa	1	Dorsal	D9	33.828	65.305	47.706	14.133	30.734	Training	Heated	Heated
306	SK	Silcrete_Reflection_00306	D9.1.10B.6B	10B	South Africa	2	Dorsal	D9	39.029	68.356	57.405	14.396	36.278	Training	Heated	Heated
307	SK	Silcrete_Reflection_00307	D9.1.10B.6B	10B	South Africa	3	Dorsal	D9	36.067	67.2	52.343	13.977	33.249	Training	Heated	Heated
308	SK	Silcrete_Reflection_00308	D9.1.10B.6B	10B	South Africa	4	Dorsal	D9	35.552	66.408	49.784	14.228	32.58	Training	Heated	Heated
309	ET	Silcrete_Reflection_00309	D9.1.10B.6B	10B	South Africa	5	Ventral	D9	32.968	60.542	45.299	16.213	28.706	Training	Heated	Heated
310	ET	Silcrete_Reflection_00310	D9.1.10B.6B	10B	South Africa	6	Ventral	D9	34.65	64.887	49.098	14.706	31.375	Training	Heated	Heated
311	ET	Silcrete_Reflection_00311	D9.1.10B.6B	10B	South Africa	7	Ventral	D9	38.455	65.947	58.89	15.673	35.116	Training	Heated	Heated
312	ET	Silcrete_Reflection_00312	D9.1.10B.6B	10B	South Africa	8	Ventral	D9	33.195	65.801	51.639	13.607	30.278	Training	Heated	Heated
313	ET	Silcrete_Reflection_00313	D9.1.10B.6B	10B	South Africa	1	Dorsal	D9	39.211	61.244	52.395	18.864	34.375	Training	Heated	Unheated
314	ET	Silcrete_Reflection_00314	D9.1.10B.6B	10B	South Africa	2	Dorsal	D9	39.863	69.649	61.679	13.863	37.374	Training	Heated	Heated
315	ET	Silcrete_Reflection_00315	D9.1.10B.6B	10B	South Africa	3	Dorsal	D9	34.668	63.771	48.796	15.322	31.098	Training	Heated	Heated
316	ET	Silcrete_Reflection_00316	D9.1.10B.6B	10B	South Africa	4	Dorsal	D9	31.789	64.701	43.934	13.585	28.74	Training	Heated	Heated
317	ET	Silcrete_Reflection_00317	D9.1.10B.6A	10B	South Africa	1	Ventral	D9	26.834	69.523	46.046	9.388	25.139	Training	Heated	Heated
318	ET	Silcrete_Reflection_00318	D9.1.10B.6A	10B	South Africa	2	Ventral	D9	30.198	79.067	58.023	5.727	29.65	Training	Heated	Heated
319	ET	Silcrete_Reflection_00319	D9.1.10B.6A	10B	South Africa	3	Ventral	D9	29.06	62.685	42.431	13.335	25.82	Training	Heated	Heated
320	ET	Silcrete_Reflection_00320	D9.1.10B.6A	10B	South Africa	4	Ventral	D9	34.734	65.067	52.61	14.643	31.497	Training	Heated	Heated
321	ET	Silcrete_Reflection_00321	D9.1.10B.6A	10B	South Africa	5	Dorsal	D9	37.068	64.908	58.336	15.719	33.57	Training	Heated	Heated
322	ET	Silcrete_Reflection_00322	D9.1.10B.6A	10B	South Africa	6	Dorsal	D9	32.546	68.749	50.181	11.796	30.333	Training	Heated	Heated
323	ET	Silcrete_Reflection_00323	D9.1.10B.6A	10B	South Africa	7	Dorsal	D9	29.871	61.188	41.402	14.396	26.173	Training	Heated	Heated
324	ET	Silcrete_Reflection_00324	D9.1.10B.6A	10B	South Africa	8	Dorsal	D9	32.366	65.88	52.383	13.226	29.54	Training	Heated	Heated
345	ET	Silcrete_Reflection_00345	E3.1.5O.11	5O	South Africa	1	Dorsal	E3	32.284	86.582	76.544	1.925	32.226	Training	Unheated	Unheated
346	ET	Silcrete_Reflection_00346	E3.1.5O.11	5O	South Africa	2	Dorsal	E3	31.014	86.409	73.848	1.943	30.953	Training	Unheated	Unheated
347	ET	Silcrete_Reflection_00347	E3.1.5O.11	5O	South Africa	3	Dorsal	E3	31.302	86.877	75.924	1.705	31.256	Training	Unheated	Unheated
348	ET	Silcrete_Reflection_00348	E3.1.5O.11	5O	South Africa	4	Dorsal	E3	31.486	87.035	78.755	1.629	31.444	Training	Unheated	Unheated
349	ET	Silcrete_Reflection_00349	E3.1.5O.11	5O	South Africa	5	Ventral	E3	31.436	86.678	76.267	1.821	31.383	Training	Unheated	Unheated
350	ET	Silcrete_Reflection_00350	E3.1.5O.11	5O	South Africa	6	Ventral	E3	35.098	86.183	85.447	2.337	35.02	Training	Unheated	Unheated
351	ET	Silcrete_Reflection_00351	E3.1.5O.11	5O	South Africa	7	Ventral	E3	33.262	87.764	87.737	1.298	33.236	Training	Unheated	Unheated
352	ET	Silcrete_Reflection_00352	E3.1.5O.11	5O	South Africa	8	Ventral	E3	32.911	86.021	74.721	2.284	32.831	Training	Unheated	Unheated
353	ET	Silcrete_Reflection_00353	E3.1.5O.6	5O	South Africa	1	Dorsal	E3	29.593	86.492	71.416	1.811	29.537	Training	Unheated	Unheated
354	ET	Silcrete_Reflection_00354	E3.1.5O.6	5O	South Africa	2	Dorsal	E3	29.788	86.935	72.271	1.593	29.745	Training	Unheated	Unheated
355	ET	Silcrete_Reflection_00355	E3.1.5O.6	5O	South Africa	3	Dorsal	E3	35.142	83.252	67.933	4.129	34.899	Training	Unheated	Unheated
356	ET	Silcrete_Reflection_00356	E3.1.5O.6	5O	South Africa	4	Dorsal	E3	28.433	86.536	68.065	1.718	28.381	Training	Unheated	Unheated
357	ET	Silcrete_Reflection_00357	E3.1.5O.6	5O	South Africa	5	Ventral	E3	32.588	87.078	80.108	1.661	32.546	Training	Unheated	Unheated
358	ET	Silcrete_Reflection_00358	E3.1.5O.6	5O	South Africa	6	Ventral	E3	29.98	87.588	75.492	1.262	29.954	Training	Unheated	Unheated
359	ET	Silcrete_Reflection_00359	E3.1.5O.6	5O	South Africa	7	Ventral	E3	29.104	87.135	74.057	1.455	29.068	Training	Unheated	Unheated
360	ET	Silcrete_Reflection_00360	E3.1.5O.6	5O	South Africa	8	Ventral	E3	30.772	87.208	77.034	1.499	30.736	Training	Unheated	Unheated
361	SK	Silcrete_Reflection_00361	D9.1.10B.6B	10B	South Africa	5	Ventral	D9	30.555	60.397	35.775	15.094	26.566	Training	Heated	Heated
362	SK	Silcrete_Reflection_00362	D9.1.10B.6B	10B	South Africa	6	Ventral	D9	33.615	64.209	51.638	14.625	30.266	Training	Heated	Heated
363	SK	Silcrete_Reflection_00363	D9.1.10B.6B	10B	South Africa	7	Ventral	D9	31.895	65.603	51.93	13.174	29.046	Training	Heated	Heated
364	SK	Silcrete_Reflection_00364	D9.1.10B.6B	10B	South Africa	8	Ventral	D9	33.828	64.444	49.51	14.593	30.518	Training	Heated	Heated
375	SK	Silcrete_Reflection_00375	D9.1.10B.18	10B	South Africa	1	Dorsal	D9	37.496	62.018	50.015	17.593	33.113	Training	Heated	Heated
376	SK	Silcrete_Reflection_00376	D9.1.10B.18	10B	South Africa	2	Dorsal	D9	25.79	68.67	42.986	9.381	24.023	Training	Heated	Heated
377	SK	Silcrete_Reflection_00377	D9.1.10B.18	10B	South Africa	3	Dorsal	D9	32.798	64.861	46.927	13.933	29.691	Training	Heated	Heated
378	SK	Silcrete_Reflection_00378	D9.1.10B.18	10B	South Africa	4	Dorsal	D9	33.574	63.166	50.036	15.155	29.958	Training	Heated	Heated
379	SK	Silcrete_Reflection_00379	D9.1.10B.18	10B	South Africa	5	Ventral	D9	29.139	68.116	41.62	10.861	27.039	Training	Heated	Heated
380	SK	Silcrete_Reflection_00380	D9.1.10B.18	10B	South Africa	6	Ventral	D9	27.242	70.49	50.127	9.098	25.678	Training	Heated	Heated
381	SK	Silcrete_Reflection_00381	D9.1.10B.18	10B	South Africa	7	Ventral	D9	29.295	74.261	51.051	7.946	28.196	Training	Heated	Heated
382	SK	Silcrete_Reflection_00382	D9.1.10B.18	10B	South Africa	8	Ventral	D9	24.991	67.144	34.62	9.707	23.029	OUTLIER	Heated
383	SK	Silcrete_Reflection_00383	E3.1.5P.23	5P	South Africa	1	Dorsal	E3	28.797	78.873	53.038	5.557	28.256	Validation	Heated	Heated
384	SK	Silcrete_Reflection_00384	E3.1.5P.23	5P	South Africa	2	Dorsal	E3	29.573	77.584	54.884	6.359	28.881	Validation	Heated	Heated
385	SK	Silcrete_Reflection_00385	E3.1.5P.23	5P	South Africa	3	Dorsal	E3	35.386	81.31	74.138	5.347	34.98	Validation	Heated	Heated
386	SK	Silcrete_Reflection_00386	E3.1.5P.23	5P	South Africa	4	Dorsal	E3	31.13	79.78	61.096	5.523	30.636	Validation	Heated	Heated
387	SK	Silcrete_Reflection_00387	E3.1.5P.23	5P	South Africa	5	Ventral	E3	32.438	77.03	58.891	7.281	31.61	Validation	Heated	Heated
388	SK	Silcrete_Reflection_00388	E3.1.5P.23	5P	South Africa	6	Ventral	E3	28.798	80.779	59.93	4.615	28.426	Validation	Heated	Unheated
389	SK	Silcrete_Reflection_00389	E3.1.5P.23	5P	South Africa	7	Ventral	E3	32.014	79.494	64.714	5.837	31.477	Validation	Heated	Heated
390	SK	Silcrete_Reflection_00390	E3.1.5P.23	5P	South Africa	8	Ventral	E3	33.566	79.16	64.161	6.313	32.967	Validation	Heated	Heated
391	SK	Silcrete_Reflection_00391	E3.1.5N.25	5N	South Africa	1	Dorsal	E3	38.649	83.581	84.05	4.321	38.407	Training	Unheated	Heated
392	SK	Silcrete_Reflection_00392	E3.1.5N.25	5N	South Africa	2	Dorsal	E3	36.842	85.6	78.771	2.826	36.733	Training	Unheated	Unheated
393	SK	Silcrete_Reflection_00393	E3.1.5N.25	5N	South Africa	3	Dorsal	E3	25.461	84.202	45.929	2.572	25.331	Training	Unheated	Heated
394	SK	Silcrete_Reflection_00394	E3.1.5N.25	5N	South Africa	4	Dorsal	E3	38.538	85.558	79.274	2.985	38.422	Training	Unheated	Unheated
395	SK	Silcrete_Reflection_00395	E3.1.5N.25	5N	South Africa	5	Ventral	E3	42.042	84.618	78.541	3.943	41.856	Training	Unheated	Unheated
396	SK	Silcrete_Reflection_00396	E3.1.5N.25	5N	South Africa	6	Ventral	E3	35.515	84.701	74.755	3.28	35.363	Training	Unheated	Unheated
397	SK	Silcrete_Reflection_00397	E3.1.5N.25	5N	South Africa	7	Ventral	E3	37.95	85.052	74.298	3.273	37.809	Training	Unheated	Unheated
398	SK	Silcrete_Reflection_00398	E3.1.5N.25	5N	South Africa	8	Ventral	E3	34.287	85.855	75.088	2.478	34.197	Training	Unheated	Unheated
399	SK	Silcrete_Reflection_00399	E3.1.6C.27	6C	South Africa	1	Dorsal	E3	50.511	57.312	59.133	27.279	42.511	Training	Heated	Heated
400	SK	Silcrete_Reflection_00400	E3.1.6C.27	6C	South Africa	2	Dorsal	E3	46.733	61.198	59.233	22.515	40.952	Training	Heated	Heated
401	SK	Silcrete_Reflection_00401	E3.1.6C.27	6C	South Africa	3	Dorsal	E3	50.374	63.44	66.914	22.524	45.058	Training	Heated	Unheated
402	SK	Silcrete_Reflection_00402	E3.1.6C.27	6C	South Africa	4	Dorsal	E3	48.016	56.82	54.282	26.278	40.187	Training	Heated	Heated
403	SK	Silcrete_Reflection_00403	E3.1.6C.27	6C	South Africa	5	Ventral	E3	46.682	60.536	55.987	22.962	40.644	Training	Heated	Heated
404	SK	Silcrete_Reflection_00404	E3.1.6C.27	6C	South Africa	6	Ventral	E3	47.341	60.553	58.822	23.274	41.225	Training	Heated	Heated
405	SK	Silcrete_Reflection_00405	E3.1.6C.27	6C	South Africa	7	Ventral	E3	48.762	58.94	58.767	25.158	41.771	Training	Heated	Heated
406	SK	Silcrete_Reflection_00406	E3.1.6C.27	6C	South Africa	8	Ventral	E3	48.891	63.988	70.179	21.441	43.938	Training	Heated	Unheated
407	SK	Silcrete_Reflection_00407	E3.1.5P.14	5P	South Africa	1	Dorsal	E3	14.654	67.095	39.888	5.703	13.499	Validation	Heated	Heated
408	SK	Silcrete_Reflection_00408	E3.1.5P.14	5P	South Africa	2	Dorsal	E3	19.242	66.584	55.494	7.647	17.657	Validation	Heated	Heated
409	SK	Silcrete_Reflection_00409	E3.1.5P.14	5P	South Africa	3	Dorsal	E3	18.318	64.336	56.94	7.933	16.511	Validation	Heated	Heated
410	SK	Silcrete_Reflection_00410	E3.1.5P.14	5P	South Africa	4	Dorsal	E3	19.082	64.398	51.547	8.245	17.208	Validation	Heated	Heated
411	SK	Silcrete_Reflection_00411	E3.1.5P.14	5P	South Africa	5	Ventral	E3	22.164	64.018	59.095	9.71	19.924	Validation	Heated	Heated
412	SK	Silcrete_Reflection_00412	E3.1.5P.14	5P	South Africa	6	Ventral	E3	19.167	63.335	55.066	8.602	17.129	Validation	Heated	Heated
413	SK	Silcrete_Reflection_00413	E3.1.5P.14	5P	South Africa	7	Ventral	E3	19.188	67.568	56.402	7.322	17.736	Validation	Heated	Heated
414	SK	Silcrete_Reflection_00414	E3.1.5P.14	5P	South Africa	8	Ventral	E3	20.036	68.713	59.313	7.274	18.669	Validation	Heated	Heated
415	SK	Silcrete_Reflection_00415	E3.1.5O.28	5O	South Africa	1	Dorsal	E3	11.833	84.307	52.937	1.174	11.775	Training	Unheated	Unheated
416	SK	Silcrete_Reflection_00416	E3.1.5O.28	5O	South Africa	2	Dorsal	E3	11.21	88.195	67.25	0.353	11.204	Training	Unheated	Unheated
417	SK	Silcrete_Reflection_00417	E3.1.5O.28	5O	South Africa	3	Dorsal	E3	8.936	86.036	53.687	0.618	8.914	Training	Unheated	Unheated
418	SK	Silcrete_Reflection_00418	E3.1.5O.28	5O	South Africa	4	Dorsal	E3	9.061	84.807	57.732	0.82	9.024	Training	Unheated	Unheated
419	SK	Silcrete_Reflection_00419	E3.1.5O.28	5O	South Africa	5	Ventral	E3	10.869	84.354	54.47	1.069	10.817	Training	Unheated	Unheated
420	SK	Silcrete_Reflection_00420	E3.1.5O.28	5O	South Africa	6	Ventral	E3	10.943	87.186	61.535	0.537	10.93	Training	Unheated	Unheated
421	SK	Silcrete_Reflection_00421	E3.1.5O.28	5O	South Africa	7	Ventral	E3	10.742	86.274	59.937	0.698	10.719	Training	Unheated	Unheated
422	SK	Silcrete_Reflection_00422	E3.1.5O.28	5O	South Africa	8	Ventral	E3	10.879	85.483	66.56	0.857	10.845	Training	Unheated	Unheated
423	SK	Silcrete_Reflection_00423	E3.1.6B.10	6B	South Africa	1	Dorsal	E3	31.462	44.062	47.764	22.608	21.88	Training	Unheated	Unheated
424	SK	Silcrete_Reflection_00424	E3.1.6B.10	6B	South Africa	2	Dorsal	E3	30.748	44.159	48.434	22.059	21.421	Training	Unheated	Unheated
425	SK	Silcrete_Reflection_00425	E3.1.6B.10	6B	South Africa	3	Dorsal	E3	34.477	44.241	53.871	24.699	24.054	OUTLIER	Unheated
426	SK	Silcrete_Reflection_00426	E3.1.6B.10	6B	South Africa	4	Dorsal	E3	31.959	46.189	53.132	22.125	23.063	Training	Unheated	Unheated
427	SK	Silcrete_Reflection_00427	E3.1.6B.10	6B	South Africa	5	Ventral	E3	27.815	47.298	49.845	18.864	20.441	Training	Unheated	Unheated
428	SK	Silcrete_Reflection_00428	E3.1.6B.10	6B	South Africa	6	Ventral	E3	21.521	45.557	38.48	15.069	15.365	OUTLIER	Unheated
429	SK	Silcrete_Reflection_00429	E3.1.6B.10	6B	South Africa	7	Ventral	E3	30.68	44.556	48.007	21.862	21.525	Training	Unheated	Unheated
430	SK	Silcrete_Reflection_00430	E3.1.6B.10	6B	South Africa	8	Ventral	E3	28.766	46.123	51.007	19.938	20.735	Training	Unheated	Unheated
431	SK	Silcrete_Reflection_00431	E3.1.1B.24	1B	South Africa	1	Dorsal	E3	25.077	39.719	45.689	19.288	16.025	OUTLIER	Heated
432	SK	Silcrete_Reflection_00432	E3.1.1B.24	1B	South Africa	2	Dorsal	E3	19.871	38.295	32.373	15.595	12.314	Test	Heated	Heated
433	SK	Silcrete_Reflection_00433	E3.1.1B.24	1B	South Africa	3	Dorsal	E3	17.208	39.067	27.046	13.36	10.845	Test	Heated	Heated
434	SK	Silcrete_Reflection_00434	E3.1.1B.24	1B	South Africa	4	Dorsal	E3	16.781	38.314	23.367	13.166	10.403	Test	Heated	Heated
435	SK	Silcrete_Reflection_00435	E3.1.1B.24	1B	South Africa	5	Ventral	E3	21.173	32.915	32.798	17.774	11.505	Test	Heated	Heated
436	SK	Silcrete_Reflection_00436	E3.1.1B.24	1B	South Africa	6	Ventral	E3	20.526	38.73	34.669	16.012	12.842	Test	Heated	Heated
437	SK	Silcrete_Reflection_00437	E3.1.1B.24	1B	South Africa	7	Ventral	E3	18.836	39.765	27.747	14.478	12.048	Test	Heated	Heated
438	SK	Silcrete_Reflection_00438	E3.1.1B.24	1B	South Africa	8	Ventral	E3	20.51	34.853	32.468	16.831	11.721	Test	Heated	Heated
439	ET	Silcrete_Reflection_00439	E3.1.6C.5	6C	South Africa	1	Dorsal	E3	46.739	55.677	49.098	26.354	38.6	Training	Heated	Heated
440	ET	Silcrete_Reflection_00440	E3.1.6C.5	6C	South Africa	2	Dorsal	E3	37.234	56.848	37.194	20.362	31.173	Training	Heated	Heated
441	ET	Silcrete_Reflection_00441	E3.1.6C.5	6C	South Africa	3	Dorsal	E3	42.547	60.395	53.925	21.019	36.992	Training	Heated	Heated
442	ET	Silcrete_Reflection_00442	E3.1.6C.5	6C	South Africa	4	Dorsal	E3	46.497	59.773	63.542	23.408	40.175	Training	Heated	Unheated
443	ET	Silcrete_Reflection_00443	E3.1.6C.5	6C	South Africa	5	Ventral	E3	48.746	53.9	50.281	28.721	39.387	Training	Heated	Heated
444	ET	Silcrete_Reflection_00444	E3.1.6C.5	6C	South Africa	6	Ventral	E3	40.186	59.198	41.294	20.578	34.517	Training	Heated	Heated
445	ET	Silcrete_Reflection_00445	E3.1.6C.5	6C	South Africa	7	Ventral	E3	48.791	55.623	50.104	27.549	40.269	Training	Heated	Heated
446	ET	Silcrete_Reflection_00446	E3.1.6C.5	6C	South Africa	8	Ventral	E3	40.394	63.917	61.546	17.76	36.28	Training	Heated	Heated
447	ET	Silcrete_Reflection_00447	E3.1.6B.2	6B	South Africa	1	Dorsal	E3	52.031	52.584	57.67	31.614	41.325	Training	Unheated	Unheated
448	ET	Silcrete_Reflection_00448	E3.1.6B.2	6B	South Africa	2	Dorsal	E3	44.991	52.962	48.956	27.101	35.914	Training	Unheated	Heated
449	ET	Silcrete_Reflection_00449	E3.1.6B.2	6B	South Africa	3	Dorsal	E3	49.493	53.177	53.722	29.664	39.619	Training	Unheated	Unheated
450	ET	Silcrete_Reflection_00450	E3.1.6B.2	6B	South Africa	4	Dorsal	E3	51.896	53.705	57.591	30.719	41.827	Training	Unheated	Unheated
451	ET	Silcrete_Reflection_00451	E3.1.6B.2	6B	South Africa	5	Ventral	E3	48.979	54.194	55.372	28.655	39.722	Training	Unheated	Unheated
452	ET	Silcrete_Reflection_00452	E3.1.6B.2	6B	South Africa	6	Ventral	E3	50.937	53.695	54.55	30.159	41.049	Training	Unheated	Unheated
453	ET	Silcrete_Reflection_00453	E3.1.6B.2	6B	South Africa	7	Ventral	E3	51.256	54.755	61.77	29.578	41.86	Training	Unheated	Unheated
454	ET	Silcrete_Reflection_00454	E3.1.6B.2	6B	South Africa	8	Ventral	E3	47.675	55.068	54.934	27.299	39.086	Training	Unheated	Heated
455	ET	Silcrete_Reflection_00455	E3.1.6B.23	6B	South Africa	1	Dorsal	E3	44.466	64.657	68.314	19.033	40.186	OUTLIER	Unheated
456	ET	Silcrete_Reflection_00456	E3.1.6B.23	6B	South Africa	2	Dorsal	E3	51.895	55.775	63.238	29.188	42.909	Training	Unheated	Heated
457	ET	Silcrete_Reflection_00457	E3.1.6B.23	6B	South Africa	3	Dorsal	E3	52.372	62.783	79.215	23.953	46.573	OUTLIER	Unheated
458	ET	Silcrete_Reflection_00458	E3.1.6B.23	6B	South Africa	4	Dorsal	E3	50.098	62.99	75.83	22.752	44.634	Training	Unheated	Unheated
459	ET	Silcrete_Reflection_00459	E3.1.6B.23	6B	South Africa	5	Ventral	E3	50.013	59.823	67.883	25.14	43.235	Training	Unheated	Unheated
460	ET	Silcrete_Reflection_00460	E3.1.6B.23	6B	South Africa	6	Ventral	E3	47.16	62.37	61.853	21.871	41.782	Training	Unheated	Heated
461	ET	Silcrete_Reflection_00461	E3.1.6B.23	6B	South Africa	7	Ventral	E3	51.098	59.351	69.436	26.049	43.96	Training	Unheated	Unheated
462	ET	Silcrete_Reflection_00462	E3.1.6B.23	6B	South Africa	8	Ventral	E3	53.099	59.021	60.408	27.331	45.524	Training	Unheated	Heated
463	ET	Silcrete_Reflection_00463	E3.1.5P.47	5P	South Africa	1	Dorsal	E3	36.934	72.85	63.191	10.891	35.291	Training	Heated	Heated
464	ET	Silcrete_Reflection_00464	E3.1.5P.47	5P	South Africa	2	Dorsal	E3	37.284	76.604	66.342	8.638	36.269	Training	Heated	Heated
465	ET	Silcrete_Reflection_00465	E3.1.5P.47	5P	South Africa	3	Dorsal	E3	37.126	76.812	69.492	8.47	36.147	Training	Heated	Heated
466	ET	Silcrete_Reflection_00466	E3.1.5P.47	5P	South Africa	4	Dorsal	E3	44.572	71.954	71.902	13.807	42.379	Training	Heated	Heated
467	ET	Silcrete_Reflection_00467	E3.1.5P.47	5P	South Africa	5	Ventral	E3	33.654	75.346	61.5	8.513	32.559	Training	Heated	Heated
468	ET	Silcrete_Reflection_00468	E3.1.5P.47	5P	South Africa	6	Ventral	E3	34.694	76.544	62.883	8.073	33.742	Training	Heated	Heated
469	ET	Silcrete_Reflection_00469	E3.1.5P.47	5P	South Africa	7	Ventral	E3	42.052	75.855	70.449	10.276	40.777	Training	Heated	Heated
470	ET	Silcrete_Reflection_00470	E3.1.5P.47	5P	South Africa	8	Ventral	E3	36.646	80.483	77.031	6.059	36.141	Training	Heated	Heated
471	ET	Silcrete_Reflection_00471	E3.1.5N.19	5N	South Africa	1	Dorsal	E3	36.651	85.167	70.919	3.088	36.521	Test	Unheated	Unheated
472	ET	Silcrete_Reflection_00472	E3.1.5N.19	5N	South Africa	2	Dorsal	E3	34.275	85.349	69.305	2.779	34.162	Test	Unheated	Unheated
473	ET	Silcrete_Reflection_00473	E3.1.5N.19	5N	South Africa	3	Dorsal	E3	31.528	86.288	69.098	2.041	31.462	Test	Unheated	Unheated
474	ET	Silcrete_Reflection_00474	E3.1.5N.19	5N	South Africa	4	Dorsal	E3	31	86.074	63.559	2.123	30.927	Test	Unheated	Unheated
475	ET	Silcrete_Reflection_00475	E3.1.5N.19	5N	South Africa	5	Ventral	E3	36.334	86.302	75.991	2.343	36.259	Test	Unheated	Unheated
476	ET	Silcrete_Reflection_00476	E3.1.5N.19	5N	South Africa	6	Ventral	E3	33.641	87.156	74.943	1.669	33.599	Test	Unheated	Unheated
477	ET	Silcrete_Reflection_00477	E3.1.5N.19	5N	South Africa	7	Ventral	E3	35.213	87.342	80.649	1.633	35.175	Test	Unheated	Unheated
478	ET	Silcrete_Reflection_00478	E3.1.5N.19	5N	South Africa	8	Ventral	E3	38.514	85.427	74.475	3.071	38.391	Test	Unheated	Unheated
479	JM	Silcrete_Reflection_00479	D9.1.12C.6	12C	South Africa	1	Dorsal	D9	31.619	86.83	75.845	1.748	31.571	Training	Unheated	Unheated
480	JM	Silcrete_Reflection_00480	D9.1.12C.6	12C	South Africa	2	Dorsal	D9	25.564	86.952	60.347	1.359	25.528	Training	Unheated	Unheated
481	JM	Silcrete_Reflection_00481	D9.1.12C.6	12C	South Africa	3	Dorsal	D9	37.755	83.68	71.611	4.156	37.526	Training	Unheated	Unheated
482	JM	Silcrete_Reflection_00482	D9.1.12C.6	12C	South Africa	4	Dorsal	D9	24.471	86.676	59.493	1.419	24.43	Training	Unheated	Unheated
483	JM	Silcrete_Reflection_00483	D9.1.12C.6	12C	South Africa	5	Ventral	D9	28.105	86.965	71.996	1.488	28.065	Training	Unheated	Unheated
484	JM	Silcrete_Reflection_00484	D9.1.12C.6	12C	South Africa	6	Ventral	D9	31.066	86.973	75.83	1.64	31.022	Training	Unheated	Unheated
485	JM	Silcrete_Reflection_00485	D9.1.12C.6	12C	South Africa	7	Ventral	D9	25.944	86.656	61.971	1.513	25.9	Training	Unheated	Unheated
486	JM	Silcrete_Reflection_00486	D9.1.12C.6	12C	South Africa	8	Ventral	D9	30.842	86.415	73.263	1.929	30.781	Training	Unheated	Unheated
607	JM	Silcrete_Reflection_00607	D9.1.12A.11	12A	South Africa	1	Dorsal	D9	26.72	84.54	72.096	2.543	26.599	Validation	Unheated	Unheated
608	JM	Silcrete_Reflection_00608	D9.1.12A.11	12A	South Africa	2	Dorsal	D9	28.22	85.029	80.194	2.445	28.114	Validation	Unheated	Unheated
609	JM	Silcrete_Reflection_00609	D9.1.12A.11	12A	South Africa	3	Dorsal	D9	32.245	77.217	50.616	7.135	31.446	Validation	Unheated	Heated
610	JM	Silcrete_Reflection_00610	D9.1.12A.11	12A	South Africa	4	Dorsal	D9	26.987	84.168	74.77	2.742	26.847	Validation	Unheated	Unheated
611	JM	Silcrete_Reflection_00611	D9.1.12A.11	12A	South Africa	5	Ventral	D9	33.189	78.594	65.832	6.564	32.533	Validation	Unheated	Heated
612	JM	Silcrete_Reflection_00612	D9.1.12A.11	12A	South Africa	6	Ventral	D9	24.075	84.683	71.946	2.231	23.972	Validation	Unheated	Unheated
613	JM	Silcrete_Reflection_00613	D9.1.12A.11	12A	South Africa	7	Ventral	D9	27.424	84.644	71.491	2.56	27.304	Validation	Unheated	Unheated
614	JM	Silcrete_Reflection_00614	D9.1.12A.11	12A	South Africa	8	Ventral	D9	27.206	83.977	68.791	2.855	27.056	Validation	Unheated	Unheated
615	JM	Silcrete_Reflection_00615	D9.1.12A.40	12A	South Africa	1	Dorsal	D9	26.788	82.321	65.471	3.579	26.548	Training	Unheated	Unheated
616	JM	Silcrete_Reflection_00616	D9.1.12A.40	12A	South Africa	2	Dorsal	D9	27.51	85.999	85.112	1.919	27.443	Training	Unheated	Unheated
617	JM	Silcrete_Reflection_00617	D9.1.12A.40	12A	South Africa	3	Dorsal	D9	27.773	84.223	74.608	2.796	27.632	Training	Unheated	Unheated
618	JM	Silcrete_Reflection_00618	D9.1.12A.40	12A	South Africa	4	Dorsal	D9	29.989	83.508	82.845	3.391	29.797	Training	Unheated	Heated
619	JM	Silcrete_Reflection_00619	D9.1.12A.40	12A	South Africa	5	Ventral	D9	25.582	84.07	71.593	2.643	25.445	Training	Unheated	Unheated
620	JM	Silcrete_Reflection_00620	D9.1.12A.40	12A	South Africa	6	Ventral	D9	23.45	84.013	68.072	2.446	23.322	Training	Unheated	Unheated
621	JM	Silcrete_Reflection_00621	D9.1.12A.40	12A	South Africa	7	Ventral	D9	25.799	84.218	72.303	2.599	25.668	Training	Unheated	Unheated
622	JM	Silcrete_Reflection_00622	D9.1.12A.40	12A	South Africa	8	Ventral	D9	35.005	82.792	84.035	4.392	34.728	Training	Unheated	Heated
623	JM	Silcrete_Reflection_00623	D9.1.12A.30	12A	South Africa	1	Dorsal	D9	32.327	83.556	70.294	3.628	32.123	Test	Unheated	Unheated
624	JM	Silcrete_Reflection_00624	D9.1.12A.30	12A	South Africa	2	Dorsal	D9	31.814	78.412	52.072	6.39	31.166	Test	Unheated	Heated
625	JM	Silcrete_Reflection_00625	D9.1.12A.30	12A	South Africa	3	Dorsal	D9	29.665	79.072	51.379	5.624	29.127	Test	Unheated	Heated
626	JM	Silcrete_Reflection_00626	D9.1.12A.30	12A	South Africa	4	Dorsal	D9	26.114	85.624	74.874	1.992	26.038	Test	Unheated	Unheated
627	JM	Silcrete_Reflection_00627	D9.1.12A.30	12A	South Africa	5	Ventral	D9	32.01	81.767	74.374	4.584	31.68	Test	Unheated	Unheated
628	JM	Silcrete_Reflection_00628	D9.1.12A.30	12A	South Africa	6	Ventral	D9	31.938	83.267	75.218	3.744	31.718	Test	Unheated	Unheated
629	JM	Silcrete_Reflection_00629	D9.1.12A.30	12A	South Africa	7	Ventral	D9	29.304	83.703	71.872	3.214	29.127	Test	Unheated	Unheated
630	JM	Silcrete_Reflection_00630	D9.1.12A.30	12A	South Africa	8	Ventral	D9	28.157	83.293	65.052	3.289	27.965	Test	Unheated	Unheated
631	JM	Silcrete_Reflection_00631	D9.1.12A.34	12A	South Africa	1	Dorsal	D9	23.777	84.337	67.007	2.346	23.661	Test	Unheated	Unheated
632	JM	Silcrete_Reflection_00632	D9.1.12A.34	12A	South Africa	2	Dorsal	D9	24.754	84.726	69.797	2.275	24.649	Test	Unheated	Unheated
633	JM	Silcrete_Reflection_00633	D9.1.12A.34	12A	South Africa	3	Dorsal	D9	25.479	84.203	72.721	2.574	25.349	Test	Unheated	Unheated
634	JM	Silcrete_Reflection_00634	D9.1.12A.34	12A	South Africa	4	Dorsal	D9	23.14	83.688	62.808	2.544	22.999	Test	Unheated	Unheated
635	JM	Silcrete_Reflection_00635	D9.1.12A.34	12A	South Africa	5	Ventral	D9	27.313	83.555	68.519	3.066	27.14	Test	Unheated	Unheated
636	JM	Silcrete_Reflection_00636	D9.1.12A.34	12A	South Africa	6	Ventral	D9	20.025	82.812	47.91	2.506	19.867	OUTLIER	Unheated
637	JM	Silcrete_Reflection_00637	D9.1.12A.34	12A	South Africa	7	Ventral	D9	22.922	84.129	66.998	2.345	22.802	Test	Unheated	Unheated
638	JM	Silcrete_Reflection_00638	D9.1.12A.34	12A	South Africa	8	Ventral	D9	24.824	83.512	65.491	2.805	24.665	Test	Unheated	Unheated
639	JM	Silcrete_Reflection_00639	D9.1.12A.38	12A	South Africa	1	Dorsal	D9	26.201	82.49	60.236	3.424	25.976	Training	Unheated	Unheated
640	JM	Silcrete_Reflection_00640	D9.1.12A.38	12A	South Africa	2	Dorsal	D9	23.29	84.018	69.965	2.427	23.164	Training	Unheated	Unheated
641	JM	Silcrete_Reflection_00641	D9.1.12A.38	12A	South Africa	3	Dorsal	D9	26.438	84.149	68.936	2.695	26.3	Training	Unheated	Unheated
642	JM	Silcrete_Reflection_00642	D9.1.12A.38	12A	South Africa	4	Dorsal	D9	28.634	83.781	75.611	3.102	28.465	Training	Unheated	Unheated
643	JM	Silcrete_Reflection_00643	D9.1.12A.38	12A	South Africa	5	Ventral	D9	25.631	84.12	69.488	2.626	25.496	Training	Unheated	Unheated
644	JM	Silcrete_Reflection_00644	D9.1.12A.38	12A	South Africa	6	Ventral	D9	24.101	83.735	63.375	2.63	23.957	Training	Unheated	Unheated
645	JM	Silcrete_Reflection_00645	D9.1.12A.38	12A	South Africa	7	Ventral	D9	24.454	83.603	66.485	2.724	24.302	Training	Unheated	Unheated
646	JM	Silcrete_Reflection_00646	D9.1.12A.38	12A	South Africa	8	Ventral	D9	27.678	82.437	61.259	3.643	27.437	Training	Unheated	Unheated
647	JM	Silcrete_Reflection_00647	D9.1.12B.22	12B	South Africa	1	Dorsal	D9	34.288	76.646	62.812	7.92	33.36	Training	Heated	Heated
648	JM	Silcrete_Reflection_00648	D9.1.12B.22	12B	South Africa	2	Dorsal	D9	31.91	69.595	53.347	11.125	29.908	Training	Heated	Heated
649	JM	Silcrete_Reflection_00649	D9.1.12B.22	12B	South Africa	3	Dorsal	D9	27.163	74.876	43.929	7.087	26.222	Training	Heated	Heated
650	JM	Silcrete_Reflection_00650	D9.1.12B.22	12B	South Africa	4	Dorsal	D9	33.491	71.334	58.679	10.719	31.729	Training	Heated	Heated
651	JM	Silcrete_Reflection_00651	D9.1.12B.22	12B	South Africa	5	Ventral	D9	38.012	72.607	65.191	11.363	36.274	Training	Heated	Heated
652	JM	Silcrete_Reflection_00652	D9.1.12B.22	12B	South Africa	6	Ventral	D9	31.17	77.588	58.65	6.7	30.442	Training	Heated	Heated
653	JM	Silcrete_Reflection_00653	D9.1.12B.22	12B	South Africa	7	Ventral	D9	26.802	81.886	57.497	3.783	26.533	Training	Heated	Heated
654	JM	Silcrete_Reflection_00654	D9.1.12B.22	12B	South Africa	8	Ventral	D9	28.857	78.845	57.135	5.583	28.312	Training	Heated	Heated
655	JM	Silcrete_Reflection_00655	D9.1.12B.37	12B	South Africa	1	Dorsal	D9	26.779	80.893	52.77	4.239	26.442	Training	Heated	Heated
656	JM	Silcrete_Reflection_00656	D9.1.12B.37	12B	South Africa	2	Dorsal	D9	27.705	76.682	55.233	6.382	26.96	Training	Heated	Heated
657	JM	Silcrete_Reflection_00657	D9.1.12B.37	12B	South Africa	3	Dorsal	D9	31.936	60.485	49.062	15.733	27.791	Training	Heated	Heated
658	JM	Silcrete_Reflection_00658	D9.1.12B.37	12B	South Africa	4	Dorsal	D9	33.706	52.203	36.608	20.658	26.634	Training	Heated	Heated
659	JM	Silcrete_Reflection_00659	D9.1.12B.37	12B	South Africa	5	Ventral	D9	23.925	84.595	48.718	2.254	23.819	Training	Heated	Unheated
660	JM	Silcrete_Reflection_00660	D9.1.12B.37	12B	South Africa	6	Ventral	D9	27.801	73.437	55.982	7.925	26.647	Training	Heated	Heated
661	JM	Silcrete_Reflection_00661	D9.1.12B.37	12B	South Africa	7	Ventral	D9	27.627	76.23	55.154	6.576	26.833	Training	Heated	Heated
662	JM	Silcrete_Reflection_00662	D9.1.12B.37	12B	South Africa	8	Ventral	D9	37.819	75.397	66.238	9.535	36.598	Training	Heated	Heated
663	JM	Silcrete_Reflection_00663	D9.1.12B.18	12B	South Africa	1	Dorsal	D9	25.675	64.31	32.968	11.13	23.137	OUTLIER	Heated
664	JM	Silcrete_Reflection_00664	D9.1.12B.18	12B	South Africa	2	Dorsal	D9	28.73	61.376	36.865	13.764	25.219	Training	Heated	Heated
665	JM	Silcrete_Reflection_00665	D9.1.12B.18	12B	South Africa	3	Dorsal	D9	31.295	82.025	63.925	4.342	30.992	Training	Heated	Unheated
666	JM	Silcrete_Reflection_00666	D9.1.12B.18	12B	South Africa	4	Dorsal	D9	32.089	73.911	51.407	8.893	30.832	Training	Heated	Heated
667	JM	Silcrete_Reflection_00667	D9.1.12B.18	12B	South Africa	5	Ventral	D9	30.105	68.085	46.532	11.236	27.93	Training	Heated	Heated
668	JM	Silcrete_Reflection_00668	D9.1.12B.18	12B	South Africa	6	Ventral	D9	30.618	73.812	50.532	8.536	29.404	Training	Heated	Heated
669	JM	Silcrete_Reflection_00669	D9.1.12B.18	12B	South Africa	7	Ventral	D9	35.385	71.692	52.651	11.115	33.594	Training	Heated	Heated
670	JM	Silcrete_Reflection_00670	D9.1.12B.18	12B	South Africa	8	Ventral	D9	34.567	74.442	56.937	9.271	33.3	Training	Heated	Heated
671	JM	Silcrete_Reflection_00671	D9.1.12B.29	12B	South Africa	1	Dorsal	D9	42.434	62.399	56.147	19.66	37.605	Training	Heated	Heated
672	JM	Silcrete_Reflection_00672	D9.1.12B.29	12B	South Africa	2	Dorsal	D9	38.729	72.888	65.558	11.396	37.015	Training	Heated	Heated
673	JM	Silcrete_Reflection_00673	D9.1.12B.29	12B	South Africa	3	Dorsal	D9	28.605	74.364	52.202	7.71	27.546	Training	Heated	Heated
674	JM	Silcrete_Reflection_00674	D9.1.12B.29	12B	South Africa	4	Dorsal	D9	33.395	70.224	50.435	11.299	31.426	Training	Heated	Heated
675	JM	Silcrete_Reflection_00675	D9.1.12B.29	12B	South Africa	5	Ventral	D9	27.76	73.049	48.288	8.093	26.554	Training	Heated	Heated
676	JM	Silcrete_Reflection_00676	D9.1.12B.29	12B	South Africa	6	Ventral	D9	30.386	82.694	64.141	3.864	30.139	Training	Heated	Heated
677	JM	Silcrete_Reflection_00677	D9.1.12B.29	12B	South Africa	7	Ventral	D9	34.713	67.115	50.975	13.5	31.981	Training	Heated	Heated
678	JM	Silcrete_Reflection_00678	D9.1.12B.29	12B	South Africa	8	Ventral	D9	36.07	78.289	67.618	7.321	35.319	Training	Heated	Heated
679	JM	Silcrete_Reflection_00679	D9.1.12B.27a	12B	South Africa	1	Dorsal	D9	34.908	85.378	82.149	2.813	34.795	Training	Heated	Unheated
680	JM	Silcrete_Reflection_00680	D9.1.12B.27a	12B	South Africa	2	Dorsal	D9	26.093	79.306	48.723	4.842	25.64	Training	Heated	Unheated
681	JM	Silcrete_Reflection_00681	D9.1.12B.27a	12B	South Africa	3	Dorsal	D9	27.135	86.081	64.077	1.854	27.071	Training	Heated	Unheated
682	JM	Silcrete_Reflection_00682	D9.1.12B.27a	12B	South Africa	4	Dorsal	D9	32.588	78.66	64.361	6.408	31.952	Training	Heated	Heated
683	JM	Silcrete_Reflection_00683	D9.1.12B.27a	12B	South Africa	5	Ventral	D9	32.483	79.386	58.246	5.983	31.928	Training	Heated	Heated
684	JM	Silcrete_Reflection_00684	D9.1.12B.27a	12B	South Africa	6	Ventral	D9	33.085	72.344	52.742	10.035	31.526	Training	Heated	Heated
685	JM	Silcrete_Reflection_00685	D9.1.12B.27a	12B	South Africa	7	Ventral	D9	35.76	76.486	63.717	8.357	34.77	Training	Heated	Heated
686	JM	Silcrete_Reflection_00686	D9.1.12B.27a	12B	South Africa	8	Ventral	D9	36.61	79.322	71.802	6.784	35.976	Training	Heated	Heated
687	JM	Silcrete_Reflection_00687	E3.1.6A.61	6A	South Africa	1	Dorsal	E3	39.146	62.32	46.513	18.184	34.666	Training	Heated	Heated
688	JM	Silcrete_Reflection_00688	E3.1.6A.61	6A	South Africa	2	Dorsal	E3	38.546	61.425	44.795	18.437	33.851	Training	Heated	Heated
689	JM	Silcrete_Reflection_00689	E3.1.6A.61	6A	South Africa	3	Dorsal	E3	37.754	62.07	43.537	17.684	33.357	Training	Heated	Heated
690	JM	Silcrete_Reflection_00690	E3.1.6A.61	6A	South Africa	4	Dorsal	E3	38.539	62.105	42.87	18.031	34.061	Training	Heated	Heated
691	JM	Silcrete_Reflection_00691	E3.1.6A.61	6A	South Africa	5	Ventral	E3	43.754	60.691	49.092	21.418	38.153	Training	Heated	Heated
692	JM	Silcrete_Reflection_00692	E3.1.6A.61	6A	South Africa	6	Ventral	E3	40.006	60.367	41.458	19.781	34.774	Training	Heated	Heated
693	JM	Silcrete_Reflection_00693	E3.1.6A.61	6A	South Africa	7	Ventral	E3	42.029	60.545	43.511	20.667	36.596	Training	Heated	Heated
694	JM	Silcrete_Reflection_00694	E3.1.6A.61	6A	South Africa	8	Ventral	E3	45.546	60.418	48.746	22.485	39.609	Training	Heated	Heated
695	JM	Silcrete_Reflection_00695	E3.1.6A.34	6A	South Africa	1	Dorsal	E3	39.12	61.221	46.376	18.834	34.288	Training	Heated	Heated
696	JM	Silcrete_Reflection_00696	E3.1.6A.34	6A	South Africa	2	Dorsal	E3	48.201	60.26	54.734	23.911	41.852	Training	Heated	Heated
697	JM	Silcrete_Reflection_00697	E3.1.6A.34	6A	South Africa	3	Dorsal	E3	47.295	60.298	59.373	23.434	41.081	Training	Heated	Heated
698	JM	Silcrete_Reflection_00698	E3.1.6A.34	6A	South Africa	4	Dorsal	E3	42.263	59.367	45.919	21.535	36.365	Training	Heated	Heated
699	JM	Silcrete_Reflection_00699	E3.1.6A.34	6A	South Africa	5	Ventral	E3	46.429	60.654	57.756	22.754	40.471	Training	Heated	Heated
700	JM	Silcrete_Reflection_00700	E3.1.6A.34	6A	South Africa	6	Ventral	E3	47.883	59.448	55.951	24.34	41.235	Training	Heated	Heated
701	JM	Silcrete_Reflection_00701	E3.1.6A.34	6A	South Africa	7	Ventral	E3	43.388	60.011	50.695	21.687	37.579	Training	Heated	Heated
702	JM	Silcrete_Reflection_00702	E3.1.6A.34	6A	South Africa	8	Ventral	E3	43.194	63.379	57.688	19.355	38.615	Training	Heated	Heated
703	JM	Silcrete_Reflection_00703	E3.1.6A.36	6A	South Africa	1	Dorsal	E3	43.389	58.347	46.976	22.77	36.935	Training	Heated	Heated
704	JM	Silcrete_Reflection_00704	E3.1.6A.36	6A	South Africa	2	Dorsal	E3	52.543	57.836	63.696	27.971	44.48	Training	Heated	Unheated
705	JM	Silcrete_Reflection_00705	E3.1.6A.36	6A	South Africa	3	Dorsal	E3	42.838	60.017	50.33	21.408	37.106	Training	Heated	Heated
706	JM	Silcrete_Reflection_00706	E3.1.6A.36	6A	South Africa	4	Dorsal	E3	43.57	58.772	49.598	22.589	37.257	Training	Heated	Heated
707	JM	Silcrete_Reflection_00707	E3.1.6A.36	6A	South Africa	5	Ventral	E3	47.437	57.278	52.297	25.642	39.909	Training	Heated	Heated
708	JM	Silcrete_Reflection_00708	E3.1.6A.36	6A	South Africa	6	Ventral	E3	44.015	58.432	48.071	23.042	37.502	Training	Heated	Heated
709	JM	Silcrete_Reflection_00709	E3.1.6A.36	6A	South Africa	7	Ventral	E3	44.733	60.767	55.477	21.846	39.036	Training	Heated	Heated
710	JM	Silcrete_Reflection_00710	E3.1.6A.36	6A	South Africa	8	Ventral	E3	42.638	57.104	45.783	23.158	35.801	Training	Heated	Heated
711	JM	Silcrete_Reflection_00711	E3.1.6A.60	6A	South Africa	1	Dorsal	E3	33.26	61.837	36.904	15.698	29.322	Training	Heated	Heated
712	JM	Silcrete_Reflection_00712	E3.1.6A.60	6A	South Africa	2	Dorsal	E3	36.484	62.971	45.319	16.58	32.499	Training	Heated	Heated
713	JM	Silcrete_Reflection_00713	E3.1.6A.60	6A	South Africa	3	Dorsal	E3	44.799	60.839	54.524	21.829	39.121	Training	Heated	Heated
714	JM	Silcrete_Reflection_00714	E3.1.6A.60	6A	South Africa	4	Dorsal	E3	37.719	62.291	45.95	17.539	33.394	Training	Heated	Heated
715	JM	Silcrete_Reflection_00715	E3.1.6A.60	6A	South Africa	5	Ventral	E3	45.381	60.85	52.897	22.105	39.633	Training	Heated	Heated
716	JM	Silcrete_Reflection_00716	E3.1.6A.60	6A	South Africa	6	Ventral	E3	48.179	58.924	48.887	24.868	41.264	Training	Heated	Heated
717	JM	Silcrete_Reflection_00717	E3.1.6A.60	6A	South Africa	7	Ventral	E3	45.179	59.493	47.292	22.935	38.924	Training	Heated	Heated
718	JM	Silcrete_Reflection_00718	E3.1.6A.60	6A	South Africa	8	Ventral	E3	45.594	61.587	51.675	21.695	40.102	Training	Heated	Heated
719	JM	Silcrete_Reflection_00719	E3.1.6A.38	6A	South Africa	1	Dorsal	E3	42.667	59.191	47.501	21.853	36.646	Validation	Heated	Heated
720	JM	Silcrete_Reflection_00720	E3.1.6A.38	6A	South Africa	2	Dorsal	E3	45.873	58.399	52.164	24.037	39.071	Validation	Heated	Heated
721	JM	Silcrete_Reflection_00721	E3.1.6A.38	6A	South Africa	3	Dorsal	E3	41.123	57.8	43.707	21.913	34.798	Validation	Heated	Heated
722	JM	Silcrete_Reflection_00722	E3.1.6A.38	6A	South Africa	4	Dorsal	E3	41.021	60.589	47.993	20.144	35.734	Validation	Heated	Heated
723	JM	Silcrete_Reflection_00723	E3.1.6A.38	6A	South Africa	5	Ventral	E3	34.431	60.156	35.141	17.134	29.865	Validation	Heated	Heated
724	JM	Silcrete_Reflection_00724	E3.1.6A.38	6A	South Africa	6	Ventral	E3	38.921	59.017	41.925	20.036	33.368	Validation	Heated	Heated
725	JM	Silcrete_Reflection_00725	E3.1.6A.38	6A	South Africa	7	Ventral	E3	45.886	60.382	56.185	22.678	39.89	Validation	Heated	Heated
726	JM	Silcrete_Reflection_00726	E3.1.6A.38	6A	South Africa	8	Ventral	E3	44.84	59.704	54.249	22.621	38.716	Validation	Heated	Heated
727	JM	Silcrete_Reflection_00727	E3.1.1A.08	1A	South Africa	1	Dorsal	E3	43.372	76.853	62.163	9.865	42.235	Training	Unheated	Unheated
728	JM	Silcrete_Reflection_00728	E3.1.1A.08	1A	South Africa	2	Dorsal	E3	61.313	78.493	84.226	12.231	60.081	OUTLIER	Unheated
729	JM	Silcrete_Reflection_00729	E3.1.1A.08	1A	South Africa	3	Dorsal	E3	42.136	78.674	65.227	8.275	41.316	Training	Unheated	Unheated
730	JM	Silcrete_Reflection_00730	E3.1.1A.08	1A	South Africa	4	Dorsal	E3	52.754	74.667	73.269	13.95	50.877	Training	Unheated	Heated
731	JM	Silcrete_Reflection_00731	E3.1.1A.08	1A	South Africa	5	Ventral	E3	44.069	79.518	69.176	8.018	43.334	Training	Unheated	Unheated
732	JM	Silcrete_Reflection_00732	E3.1.1A.08	1A	South Africa	6	Ventral	E3	44.041	79.555	69.991	7.984	43.311	Training	Unheated	Heated
733	JM	Silcrete_Reflection_00733	E3.1.1A.08	1A	South Africa	7	Ventral	E3	42.296	77.534	60.163	9.13	41.299	Training	Unheated	Unheated
734	JM	Silcrete_Reflection_00734	E3.1.1A.08	1A	South Africa	8	Ventral	E3	48.423	77.829	71.389	10.209	47.335	Training	Unheated	Unheated
735	JM	Silcrete_Reflection_00735	E3.1.1A.46	1A	South Africa	1	Dorsal	E3	46.658	76.931	58.477	10.551	45.449	Training	Unheated	Unheated
736	JM	Silcrete_Reflection_00736	E3.1.1A.46	1A	South Africa	2	Dorsal	E3	40.936	76.74	44.747	9.39	39.844	OUTLIER	Unheated
737	JM	Silcrete_Reflection_00737	E3.1.1A.46	1A	South Africa	3	Dorsal	E3	51.032	76.951	72.019	11.522	49.714	Training	Unheated	Unheated
738	JM	Silcrete_Reflection_00738	E3.1.1A.46	1A	South Africa	4	Dorsal	E3	52.86	78.722	69.461	10.338	51.84	Training	Unheated	Unheated
739	JM	Silcrete_Reflection_00739	E3.1.1A.46	1A	South Africa	5	Ventral	E3	53.02	79.071	70.832	10.053	52.059	Training	Unheated	Unheated
740	JM	Silcrete_Reflection_00740	E3.1.1A.46	1A	South Africa	6	Ventral	E3	56.59	77.882	70.512	11.88	55.329	Training	Unheated	Unheated
741	JM	Silcrete_Reflection_00741	E3.1.1A.46	1A	South Africa	7	Ventral	E3	51.452	75.43	55.354	12.943	49.797	OUTLIER	Unheated
742	JM	Silcrete_Reflection_00742	E3.1.1A.46	1A	South Africa	8	Ventral	E3	56.798	76.191	67.208	13.557	55.157	Training	Unheated	Unheated
743	JM	Silcrete_Reflection_00743	E3.1.1A.50	1A	South Africa	1	Dorsal	E3	44.536	77.242	55.343	9.835	43.436	Training	Unheated	Unheated
744	JM	Silcrete_Reflection_00744	E3.1.1A.50	1A	South Africa	2	Dorsal	E3	42.103	78.369	51.524	8.489	41.239	Training	Unheated	Unheated
745	JM	Silcrete_Reflection_00745	E3.1.1A.50	1A	South Africa	3	Dorsal	E3	44.053	77.216	63.995	9.748	42.961	Training	Unheated	Unheated
746	JM	Silcrete_Reflection_00746	E3.1.1A.50	1A	South Africa	4	Dorsal	E3	48.978	76.323	66.512	11.581	47.589	Training	Unheated	Unheated
747	JM	Silcrete_Reflection_00747	E3.1.1A.50	1A	South Africa	5	Ventral	E3	58.467	76.186	72.44	13.96	56.776	Training	Unheated	Unheated
748	JM	Silcrete_Reflection_00748	E3.1.1A.50	1A	South Africa	6	Ventral	E3	54.446	78.309	67.367	11.033	53.317	Training	Unheated	Unheated
749	JM	Silcrete_Reflection_00749	E3.1.1A.50	1A	South Africa	7	Ventral	E3	60.545	77.125	74.423	13.491	59.023	Training	Unheated	Unheated
750	JM	Silcrete_Reflection_00750	E3.1.1A.50	1A	South Africa	8	Ventral	E3	49.932	78.632	62.029	9.842	48.952	Training	Unheated	Unheated
751	JM	Silcrete_Reflection_00751	E3.1.1A.48	1A	South Africa	1	Dorsal	E3	55.143	79.153	72.89	10.378	54.158	Training	Unheated	Unheated
752	JM	Silcrete_Reflection_00752	E3.1.1A.48	1A	South Africa	2	Dorsal	E3	53.184	76.107	63.831	12.77	51.628	Training	Unheated	Unheated
753	JM	Silcrete_Reflection_00753	E3.1.1A.48	1A	South Africa	3	Dorsal	E3	60.061	75.715	70.689	14.82	58.204	Training	Unheated	Unheated
754	JM	Silcrete_Reflection_00754	E3.1.1A.48	1A	South Africa	4	Dorsal	E3	52.998	74.995	67.032	13.721	51.191	Training	Unheated	Unheated
755	JM	Silcrete_Reflection_00755	E3.1.1A.48	1A	South Africa	5	Ventral	E3	60.682	76.296	71.996	14.376	58.955	Training	Unheated	Unheated
756	JM	Silcrete_Reflection_00756	E3.1.1A.48	1A	South Africa	6	Ventral	E3	58.15	78.062	73.386	12.029	56.893	Training	Unheated	Unheated
757	JM	Silcrete_Reflection_00757	E3.1.1A.48	1A	South Africa	7	Ventral	E3	55.642	76.387	63.375	13.096	54.079	Training	Unheated	Unheated
758	JM	Silcrete_Reflection_00758	E3.1.1A.48	1A	South Africa	8	Ventral	E3	63.127	75.828	74.078	15.456	61.206	OUTLIER	Unheated
759	JM	Silcrete_Reflection_00759	E3.1.1A.14	1A	South Africa	1	Dorsal	E3	40.679	77.734	60.116	8.642	39.75	Training	Unheated	Unheated
760	JM	Silcrete_Reflection_00760	E3.1.1A.14	1A	South Africa	2	Dorsal	E3	40.35	75.686	54.086	9.976	39.097	Training	Unheated	Unheated
761	JM	Silcrete_Reflection_00761	E3.1.1A.14	1A	South Africa	3	Dorsal	E3	39.819	77.479	58.487	8.633	38.872	Training	Unheated	Unheated
762	JM	Silcrete_Reflection_00762	E3.1.1A.14	1A	South Africa	4	Dorsal	E3	38.833	77.688	55.09	8.281	37.94	Training	Unheated	Unheated
763	JM	Silcrete_Reflection_00763	E3.1.1A.14	1A	South Africa	5	Ventral	E3	51.154	78.02	76.53	10.618	50.04	Training	Unheated	Unheated
764	JM	Silcrete_Reflection_00764	E3.1.1A.14	1A	South Africa	6	Ventral	E3	46.42	77.488	67.869	10.057	45.317	Training	Unheated	Unheated
765	JM	Silcrete_Reflection_00765	E3.1.1A.14	1A	South Africa	7	Ventral	E3	29.887	79.228	49.591	5.586	29.361	Training	Unheated	Heated
766	JM	Silcrete_Reflection_00766	E3.1.1A.14	1A	South Africa	8	Ventral	E3	47.803	76.65	70.396	11.037	46.511	Training	Unheated	Unheated
767	JM	Silcrete_Reflection_00767	I14.2.16A.06	16A	South Africa	1	Dorsal	I14	34.178	80.969	59.704	5.365	33.755	Training	Unheated	Heated
768	JM	Silcrete_Reflection_00768	I14.2.16A.06	16A	South Africa	2	Dorsal	I14	31.767	84.158	67.71	3.233	31.602	Training	Unheated	Unheated
769	JM	Silcrete_Reflection_00769	I14.2.16A.06	16A	South Africa	3	Dorsal	I14	30.377	84.864	72.105	2.719	30.255	Training	Unheated	Unheated
770	JM	Silcrete_Reflection_00770	I14.2.16A.06	16A	South Africa	4	Dorsal	I14	34.549	82.457	66.257	4.535	34.25	Training	Unheated	Heated
771	JM	Silcrete_Reflection_00771	I14.2.16A.06	16A	South Africa	5	Ventral	I14	31.578	85.73	78.757	2.351	31.49	Training	Unheated	Unheated
772	JM	Silcrete_Reflection_00772	I14.2.16A.06	16A	South Africa	6	Ventral	I14	32.154	84.492	71.002	3.086	32.006	Training	Unheated	Unheated
773	JM	Silcrete_Reflection_00773	I14.2.16A.06	16A	South Africa	7	Ventral	I14	30.327	84.416	66.65	2.951	30.183	Training	Unheated	Unheated
774	JM	Silcrete_Reflection_00774	I14.2.16A.06	16A	South Africa	8	Ventral	I14	38.383	82.352	73.439	5.108	38.041	Training	Unheated	Unheated
775	JM	Silcrete_Reflection_00775	I14.2.16A.32	16A	South Africa	1	Dorsal	I14	37.651	82.374	71.671	4.996	37.318	Training	Unheated	Unheated
776	JM	Silcrete_Reflection_00776	I14.2.16A.32	16A	South Africa	2	Dorsal	I14	29.642	81.925	55.081	4.164	29.348	Training	Unheated	Heated
777	JM	Silcrete_Reflection_00777	I14.2.16A.32	16A	South Africa	3	Dorsal	I14	32.98	85.894	82.963	2.361	32.895	Training	Unheated	Unheated
778	JM	Silcrete_Reflection_00778	I14.2.16A.32	16A	South Africa	4	Dorsal	I14	31.105	84.083	76.562	3.206	30.94	Training	Unheated	Unheated
779	JM	Silcrete_Reflection_00779	I14.2.16A.32	16A	South Africa	5	Ventral	I14	40.599	82.586	74.348	5.239	40.26	Training	Unheated	Unheated
780	JM	Silcrete_Reflection_00780	I14.2.16A.32	16A	South Africa	6	Ventral	I14	33.727	85.486	87.337	2.654	33.622	Training	Unheated	Unheated
781	JM	Silcrete_Reflection_00781	I14.2.16A.32	16A	South Africa	7	Ventral	I14	30.889	85.347	76.533	2.506	30.787	Training	Unheated	Unheated
782	JM	Silcrete_Reflection_00782	I14.2.16A.32	16A	South Africa	8	Ventral	I14	33.898	85.623	85.688	2.587	33.799	Training	Unheated	Unheated
783	JM	Silcrete_Reflection_00783	I14.2.16A.28	16A	South Africa	1	Dorsal	I14	34.457	82.152	63.134	4.705	34.134	Test	Unheated	Unheated
784	JM	Silcrete_Reflection_00784	I14.2.16A.28	16A	South Africa	2	Dorsal	I14	33.805	84.325	77.806	3.343	33.639	Test	Unheated	Unheated
785	JM	Silcrete_Reflection_00785	I14.2.16A.28	16A	South Africa	3	Dorsal	I14	30.407	84.079	73.408	3.137	30.245	Test	Unheated	Unheated
786	JM	Silcrete_Reflection_00786	I14.2.16A.28	16A	South Africa	4	Dorsal	I14	39.515	83.646	84.316	4.373	39.272	Test	Unheated	Unheated
787	JM	Silcrete_Reflection_00787	I14.2.16A.28	16A	South Africa	5	Ventral	I14	40.796	82.463	76.215	5.351	40.444	Test	Unheated	Unheated
788	JM	Silcrete_Reflection_00788	I14.2.16A.28	16A	South Africa	6	Ventral	I14	41.518	82.581	76.644	5.361	41.171	Test	Unheated	Unheated
789	JM	Silcrete_Reflection_00789	I14.2.16A.28	16A	South Africa	7	Ventral	I14	32.219	85.437	83.664	2.563	32.117	Test	Unheated	Unheated
790	JM	Silcrete_Reflection_00790	I14.2.16A.28	16A	South Africa	8	Ventral	I14	30.968	83.431	67.429	3.543	30.765	Test	Unheated	Unheated
791		Silcrete_Reflection_00791	I14.2.16A.13	16A	South Africa	1	Dorsal	I14	34.457	82.152	63.134	4.705	34.134	Training	Unheated	Unheated
792		Silcrete_Reflection_00792	I14.2.16A.13	16A	South Africa	2	Dorsal	I14	33.805	84.325	77.806	3.343	33.639	Training	Unheated	Unheated
793		Silcrete_Reflection_00793	I14.2.16A.13	16A	South Africa	3	Dorsal	I14	30.407	84.079	73.408	3.137	30.245	Training	Unheated	Unheated
794		Silcrete_Reflection_00794	I14.2.16A.13	16A	South Africa	4	Dorsal	I14	39.515	83.646	84.316	4.373	39.272	Training	Unheated	Unheated
795		Silcrete_Reflection_00795	I14.2.16A.13	16A	South Africa	5	Ventral	I14	40.796	82.463	76.215	5.351	40.444	Training	Unheated	Unheated
796		Silcrete_Reflection_00796	I14.2.16A.13	16A	South Africa	6	Ventral	I14	41.518	82.581	76.644	5.361	41.171	Training	Unheated	Unheated
797		Silcrete_Reflection_00797	I14.2.16A.13	16A	South Africa	7	Ventral	I14	32.219	85.437	83.664	2.563	32.117	Training	Unheated	Unheated
798		Silcrete_Reflection_00798	I14.2.16A.13	16A	South Africa	8	Ventral	I14	30.968	83.431	67.429	3.543	30.765	Training	Unheated	Unheated
799	JM	Silcrete_Reflection_00799	I14.2.16A.23	16A	South Africa	1	Dorsal	I14	25.044	86.046	68.23	1.727	24.984	Training	Unheated	Unheated
800	JM	Silcrete_Reflection_00800	I14.2.16A.23	16A	South Africa	2	Dorsal	I14	29.206	85.6	80.996	2.24	29.12	Training	Unheated	Unheated
801	JM	Silcrete_Reflection_00801	I14.2.16A.23	16A	South Africa	3	Dorsal	I14	37.416	82.801	71.528	4.689	37.121	Training	Unheated	Unheated
802	JM	Silcrete_Reflection_00802	I14.2.16A.23	16A	South Africa	4	Dorsal	I14	27.792	86.178	69.408	1.852	27.73	Training	Unheated	Unheated
803	JM	Silcrete_Reflection_00803	I14.2.16A.23	16A	South Africa	5	Ventral	I14	32.865	85.238	80.804	2.728	32.751	Training	Unheated	Unheated
804	JM	Silcrete_Reflection_00804	I14.2.16A.23	16A	South Africa	6	Ventral	I14	30.051	85.057	76.058	2.589	29.939	Training	Unheated	Unheated
805	JM	Silcrete_Reflection_00805	I14.2.16A.23	16A	South Africa	7	Ventral	I14	30.07	86.644	86.828	1.76	30.019	Training	Unheated	Unheated
806	JM	Silcrete_Reflection_00806	I14.2.16A.23	16A	South Africa	8	Ventral	I14	29.959	85.809	79.375	2.189	29.879	Training	Unheated	Unheated
807	JM	Silcrete_Reflection_00807	I14.2.16A.37	16A	South Africa	1	Dorsal	I14	30.503	84.052	68.205	3.161	30.339	Training	Unheated	Unheated
808	JM	Silcrete_Reflection_00808	I14.2.16A.37	16A	South Africa	2	Dorsal	I14	27.601	84.801	67.942	2.501	27.488	Training	Unheated	Unheated
809	JM	Silcrete_Reflection_00809	I14.2.16A.37	16A	South Africa	3	Dorsal	I14	26.773	84.791	61.606	2.431	26.662	Training	Unheated	Unheated
810	JM	Silcrete_Reflection_00810	I14.2.16A.37	16A	South Africa	4	Dorsal	I14	34.785	83.284	69.511	4.068	34.546	Training	Unheated	Unheated
811	JM	Silcrete_Reflection_00811	I14.2.16A.37	16A	South Africa	5	Ventral	I14	29.474	86.331	75.906	1.886	29.413	Training	Unheated	Unheated
812	JM	Silcrete_Reflection_00812	I14.2.16A.37	16A	South Africa	6	Ventral	I14	43.561	82.876	78.82	5.402	43.225	Training	Unheated	Heated
813	JM	Silcrete_Reflection_00813	I14.2.16A.37	16A	South Africa	7	Ventral	I14	25.37	82.762	46.73	3.196	25.168	Training	Unheated	Heated
814	JM	Silcrete_Reflection_00814	I14.2.16A.37	16A	South Africa	8	Ventral	I14	33.842	83.53	71.009	3.813	33.626	Training	Unheated	Unheated
815	JM	Silcrete_Reflection_00815	I14.2.16A.35	16A	South Africa	1	Dorsal	I14	34.926	84.779	75.437	3.178	34.781	Training	Unheated	Unheated
816	JM	Silcrete_Reflection_00816	I14.2.16A.35	16A	South Africa	2	Dorsal	I14	31.553	84.043	64.053	3.275	31.383	Training	Unheated	Heated
817	JM	Silcrete_Reflection_00817	I14.2.16A.35	16A	South Africa	3	Dorsal	I14	29.089	83.356	57.525	3.366	28.894	Training	Unheated	Unheated
818	JM	Silcrete_Reflection_00818	I14.2.16A.35	16A	South Africa	4	Dorsal	I14	30.244	85.845	75.836	2.191	30.165	Training	Unheated	Unheated
819	JM	Silcrete_Reflection_00819	I14.2.16A.35	16A	South Africa	5	Ventral	I14	40.289	82.173	73.166	5.487	39.913	Training	Unheated	Unheated
820	JM	Silcrete_Reflection_00820	I14.2.16A.35	16A	South Africa	6	Ventral	I14	35.858	83.1	69.164	4.308	35.599	Training	Unheated	Unheated
821	JM	Silcrete_Reflection_00821	I14.2.16A.35	16A	South Africa	7	Ventral	I14	39.942	81.958	73.304	5.588	39.549	Training	Unheated	Unheated
822	JM	Silcrete_Reflection_00822	I14.2.16A.35	16A	South Africa	8	Ventral	I14	31.158	84.54	67.155	2.965	31.017	Training	Unheated	Unheated
823	JM	Silcrete_Reflection_00823	I14.2.16A.07	16A	South Africa	1	Dorsal	I14	32.301	85.596	80.872	2.481	32.206	Training	Unheated	Unheated
824	JM	Silcrete_Reflection_00824	I14.2.16A.07	16A	South Africa	2	Dorsal	I14	28.588	85.251	68.357	2.367	28.49	Training	Unheated	Unheated
825	JM	Silcrete_Reflection_00825	I14.2.16A.07	16A	South Africa	3	Dorsal	I14	27.769	85.628	69.605	2.117	27.688	Training	Unheated	Unheated
826	JM	Silcrete_Reflection_00826	I14.2.16A.07	16A	South Africa	4	Dorsal	I14	31.463	85.546	72.734	2.444	31.368	Training	Unheated	Unheated
827	JM	Silcrete_Reflection_00827	I14.2.16A.07	16A	South Africa	5	Ventral	I14	37.168	84.265	80.519	3.714	36.982	Training	Unheated	Unheated
828	JM	Silcrete_Reflection_00828	I14.2.16A.07	16A	South Africa	6	Ventral	I14	41.016	82.953	77.077	5.032	40.707	Training	Unheated	Unheated
829	JM	Silcrete_Reflection_00829	I14.2.16A.07	16A	South Africa	7	Ventral	I14	22.763	85.365	62.999	1.839	22.689	Training	Unheated	Unheated
830	JM	Silcrete_Reflection_00830	I14.2.16A.07	16A	South Africa	8	Ventral	I14	27.068	85.983	72.312	1.896	27.002	Training	Unheated	Unheated
831	JM	Silcrete_Reflection_00831	I14.2.16A.04	16A	South Africa	1	Dorsal	I14	29.659	85.411	72.551	2.373	29.564	Test	Unheated	Unheated
832	JM	Silcrete_Reflection_00832	I14.2.16A.04	16A	South Africa	2	Dorsal	I14	30.609	85.069	73.324	2.631	30.495	Test	Unheated	Unheated
833	JM	Silcrete_Reflection_00833	I14.2.16A.04	16A	South Africa	3	Dorsal	I14	25.235	84.873	63.409	2.255	25.134	Test	Unheated	Unheated
834	JM	Silcrete_Reflection_00834	I14.2.16A.04	16A	South Africa	4	Dorsal	I14	34.09	83.182	71.333	4.047	33.849	Test	Unheated	Unheated
835	JM	Silcrete_Reflection_00835	I14.2.16A.04	16A	South Africa	5	Ventral	I14	39.368	84.225	80.402	3.961	39.168	Test	Unheated	Unheated
836	JM	Silcrete_Reflection_00836	I14.2.16A.04	16A	South Africa	6	Ventral	I14	26.155	84.839	65.213	2.353	26.049	Test	Unheated	Unheated
837	JM	Silcrete_Reflection_00837	I14.2.16A.04	16A	South Africa	7	Ventral	I14	27.016	84.397	62.084	2.638	26.887	Test	Unheated	Unheated
838	JM	Silcrete_Reflection_00838	I14.2.16A.04	16A	South Africa	8	Ventral	I14	38.886	83.397	76.757	4.471	38.628	Test	Unheated	Unheated
839	JM	Silcrete_Reflection_00839	I14.2.16A.44	16A	South Africa	1	Dorsal	I14	36.444	81.682	65.484	5.272	36.061	Training	Unheated	Heated
840	JM	Silcrete_Reflection_00840	I14.2.16A.44	16A	South Africa	2	Dorsal	I14	40.239	83.817	81.011	4.334	40.005	Training	Unheated	Unheated
841	JM	Silcrete_Reflection_00841	I14.2.16A.44	16A	South Africa	3	Dorsal	I14	29.534	84.899	72.658	2.626	29.417	Training	Unheated	Unheated
842	JM	Silcrete_Reflection_00842	I14.2.16A.44	16A	South Africa	4	Dorsal	I14	35.717	82.886	69.645	4.423	35.442	Training	Unheated	Unheated
843	JM	Silcrete_Reflection_00843	I14.2.16A.44	16A	South Africa	5	Ventral	I14	42.195	82.882	76.568	5.229	41.87	Training	Unheated	Unheated
844	JM	Silcrete_Reflection_00844	I14.2.16A.44	16A	South Africa	6	Ventral	I14	33.983	81.954	62.042	4.757	33.648	Training	Unheated	Unheated
845	JM	Silcrete_Reflection_00845	I14.2.16A.44	16A	South Africa	7	Ventral	I14	32.259	85.553	84.706	2.502	32.162	Training	Unheated	Unheated
846	JM	Silcrete_Reflection_00846	I14.2.16A.44	16A	South Africa	8	Ventral	I14	39.717	82.74	76.086	5.019	39.398	Training	Unheated	Unheated
847	JM	Silcrete_Reflection_00847	I14.2.16B.10	16B	South Africa	1	Dorsal	I14	28.762	75.815	54.475	7.048	27.885	Training	Heated	Heated
848	JM	Silcrete_Reflection_00848	I14.2.16B.10	16B	South Africa	2	Dorsal	I14	36.96	79.223	70.735	6.911	36.308	Training	Heated	Heated
849	JM	Silcrete_Reflection_00849	I14.2.16B.10	16B	South Africa	3	Dorsal	I14	41.509	70.122	64.217	14.114	39.036	Training	Heated	Heated
850	JM	Silcrete_Reflection_00850	I14.2.16B.10	16B	South Africa	4	Dorsal	I14	38.313	71.833	63.307	11.945	36.403	Training	Heated	Heated
851	JM	Silcrete_Reflection_00851	I14.2.16B.10	16B	South Africa	5	Ventral	I14	39.222	75.037	72.56	10.127	37.892	Training	Heated	Heated
852	JM	Silcrete_Reflection_00852	I14.2.16B.10	16B	South Africa	6	Ventral	I14	34.456	76.821	70.116	7.856	33.548	Training	Heated	Heated
853	JM	Silcrete_Reflection_00853	I14.2.16B.10	16B	South Africa	7	Ventral	I14	37.245	77.76	75.793	7.896	36.398	Training	Heated	Heated
854	JM	Silcrete_Reflection_00854	I14.2.16B.10	16B	South Africa	8	Ventral	I14	47.335	70.478	71.587	15.818	44.614	Training	Heated	Heated
855	JM	Silcrete_Reflection_00855	I14.2.16B.15	16B	South Africa	1	Dorsal	I14	36.646	82.438	71.938	4.823	36.327	Test	Heated	Unheated
856	JM	Silcrete_Reflection_00856	I14.2.16B.15	16B	South Africa	2	Dorsal	I14	30.771	78.721	59.631	6.019	30.177	Test	Heated	Heated
857	JM	Silcrete_Reflection_00857	I14.2.16B.15	16B	South Africa	3	Dorsal	I14	41.018	74.805	63.298	10.751	39.584	Test	Heated	Heated
858	JM	Silcrete_Reflection_00858	I14.2.16B.15	16B	South Africa	4	Dorsal	I14	31.88	79.779	57.607	5.657	31.374	Test	Heated	Heated
859	JM	Silcrete_Reflection_00859	I14.2.16B.15	16B	South Africa	5	Ventral	I14	32.183	74.901	50.319	8.383	31.072	Test	Heated	Heated
860	JM	Silcrete_Reflection_00860	I14.2.16B.15	16B	South Africa	6	Ventral	I14	28.815	79.621	67.318	5.192	28.344	Test	Heated	Heated
861	JM	Silcrete_Reflection_00861	I14.2.16B.15	16B	South Africa	7	Ventral	I14	33.551	81.602	67.772	4.9	33.191	Test	Heated	Unheated
862	JM	Silcrete_Reflection_00862	I14.2.16B.15	16B	South Africa	8	Ventral	I14	38.931	81.776	77.933	5.569	38.531	Test	Heated	Unheated
863	JM	Silcrete_Reflection_00863	I14.2.16B.42	16B	South Africa	1	Dorsal	I14	40.424	73.77	68.811	11.298	38.813	Training	Heated	Heated
864	JM	Silcrete_Reflection_00864	I14.2.16B.42	16B	South Africa	2	Dorsal	I14	40.827	74.577	73.121	10.857	39.357	Training	Heated	Heated
865	JM	Silcrete_Reflection_00865	I14.2.16B.42	16B	South Africa	3	Dorsal	I14	41.6	74.295	70.75	11.261	40.047	Training	Heated	Heated
866	JM	Silcrete_Reflection_00866	I14.2.16B.42	16B	South Africa	4	Dorsal	I14	36.141	76.874	63.942	8.207	35.197	Training	Heated	Heated
867	JM	Silcrete_Reflection_00867	I14.2.16B.42	16B	South Africa	5	Ventral	I14	42.988	71.971	72.395	13.305	40.877	Training	Heated	Heated
868	JM	Silcrete_Reflection_00868	I14.2.16B.42	16B	South Africa	6	Ventral	I14	38.94	76.436	79.426	9.133	37.854	Training	Heated	Heated
869	JM	Silcrete_Reflection_00869	I14.2.16B.42	16B	South Africa	7	Ventral	I14	38.886	74.051	65.979	10.685	37.389	Training	Heated	Heated
870	JM	Silcrete_Reflection_00870	I14.2.16B.42	16B	South Africa	8	Ventral	I14	26.681	80.201	58.717	4.541	26.292	Training	Heated	Heated
871	JM	Silcrete_Reflection_00871	I14.2.16B.47	16B	South Africa	1	Dorsal	I14	27.893	79.941	61.622	4.872	27.464	Validation	Heated	Heated
872	JM	Silcrete_Reflection_00872	I14.2.16B.47	16B	South Africa	2	Dorsal	I14	32.212	82.039	87.978	4.461	31.902	Validation	Heated	Unheated
873	JM	Silcrete_Reflection_00873	I14.2.16B.47	16B	South Africa	3	Dorsal	I14	33.498	81.446	87.885	4.982	33.126	Validation	Heated	Unheated
874	JM	Silcrete_Reflection_00874	I14.2.16B.47	16B	South Africa	4	Dorsal	I14	32.867	81.027	86.745	5.127	32.465	Validation	Heated	Unheated
875	JM	Silcrete_Reflection_00875	I14.2.16B.47	16B	South Africa	5	Ventral	I14	45.234	74.338	72.758	12.211	43.554	Validation	Heated	Heated
876	JM	Silcrete_Reflection_00876	I14.2.16B.47	16B	South Africa	6	Ventral	I14	33.184	79.987	69.912	5.77	32.679	Validation	Heated	Heated
877	JM	Silcrete_Reflection_00877	I14.2.16B.47	16B	South Africa	7	Ventral	I14	30.215	79.498	68.987	5.507	29.709	Validation	Heated	Heated
878	JM	Silcrete_Reflection_00878	I14.2.16B.47	16B	South Africa	8	Ventral	I14	37.042	81.697	71.736	5.349	36.654	Validation	Heated	Unheated
879	JM	Silcrete_Reflection_00879	I14.2.16B.49	16B	South Africa	1	Dorsal	I14	35.724	82.415	85.463	4.715	35.411	Validation	Heated	Unheated
880	JM	Silcrete_Reflection_00880	I14.2.16B.49	16B	South Africa	2	Dorsal	I14	41.122	73.587	67.826	11.62	39.446	Validation	Heated	Heated
881	JM	Silcrete_Reflection_00881	I14.2.16B.49	16B	South Africa	3	Dorsal	I14	41.445	77.129	71.673	9.232	40.404	Validation	Heated	Heated
882	JM	Silcrete_Reflection_00882	I14.2.16B.49	16B	South Africa	4	Dorsal	I14	39.395	74.065	63.912	10.816	37.881	Validation	Heated	Heated
883	JM	Silcrete_Reflection_00883	I14.2.16B.49	16B	South Africa	5	Ventral	I14	33.182	83.292	89.829	3.876	32.955	Validation	Heated	Unheated
884	JM	Silcrete_Reflection_00884	I14.2.16B.49	16B	South Africa	6	Ventral	I14	35.496	76.225	63.845	8.452	34.476	Validation	Heated	Heated
885	JM	Silcrete_Reflection_00885	I14.2.16B.49	16B	South Africa	7	Ventral	I14	39.963	79.479	74.295	7.297	39.291	Validation	Heated	Heated
886	JM	Silcrete_Reflection_00886	I14.2.16B.49	16B	South Africa	8	Ventral	I14	34.033	81.416	78.16	5.08	33.652	Validation	Heated	Heated
887	JM	Silcrete_Reflection_00887	I14.2.16B.61	16B	South Africa	1	Dorsal	I14	30.164	82.119	79.997	4.136	29.879	Training	Heated	Unheated
888	JM	Silcrete_Reflection_00888	I14.2.16B.61	16B	South Africa	2	Dorsal	I14	31.898	80.464	70.515	5.285	31.457	Training	Heated	Heated
889	JM	Silcrete_Reflection_00889	I14.2.16B.61	16B	South Africa	3	Dorsal	I14	31.422	76.706	60.803	7.226	30.58	Training	Heated	Heated
890	JM	Silcrete_Reflection_00890	I14.2.16B.61	16B	South Africa	4	Dorsal	I14	27.735	80.975	63.573	4.351	27.392	Training	Heated	Unheated
891	JM	Silcrete_Reflection_00891	I14.2.16B.61	16B	South Africa	5	Ventral	I14	38.561	74.679	65.55	10.189	37.19	Training	Heated	Heated
892	JM	Silcrete_Reflection_00892	I14.2.16B.61	16B	South Africa	6	Ventral	I14	28.959	79.752	59.019	5.152	28.497	Training	Heated	Heated
893	JM	Silcrete_Reflection_00893	I14.2.16B.61	16B	South Africa	7	Ventral	I14	46.835	73.075	70.965	13.635	44.807	Training	Heated	Heated
894	JM	Silcrete_Reflection_00894	I14.2.16B.61	16B	South Africa	8	Ventral	I14	30.748	82.16	85.139	4.194	30.46	Training	Heated	Unheated
895	JM	Silcrete_Reflection_00895	I14.2.16B.55a	16B	South Africa	1	Dorsal	I14	27.301	76.945	56.759	6.167	26.595	Training	Heated	Heated
896	JM	Silcrete_Reflection_00896	I14.2.16B.55a	16B	South Africa	2	Dorsal	I14	41.573	76.058	75.297	10.017	40.349	Training	Heated	Heated
897	JM	Silcrete_Reflection_00897	I14.2.16B.55a	16B	South Africa	3	Dorsal	I14	44.3	81.302	86.444	6.699	43.791	Training	Heated	Unheated
898	JM	Silcrete_Reflection_00898	I14.2.16B.55a	16B	South Africa	4	Dorsal	I14	41	77.782	72.459	8.677	40.071	Training	Heated	Heated
899	JM	Silcrete_Reflection_00899	I14.2.16B.55a	16B	South Africa	5	Ventral	I14	33.098	79.305	71.203	6.142	32.523	Training	Heated	Heated
900	JM	Silcrete_Reflection_00900	I14.2.16B.55a	16B	South Africa	6	Ventral	I14	36.816	79.687	68.99	6.591	36.222	Training	Heated	Heated
901	JM	Silcrete_Reflection_00901	I14.2.16B.55a	16B	South Africa	7	Ventral	I14	24.648	79.137	54.702	4.645	24.206	Training	Heated	Heated
902	JM	Silcrete_Reflection_00902	I14.2.16B.55a	16B	South Africa	8	Ventral	I14	34.293	75.865	63.385	8.375	33.255	Training	Heated	Heated
903	JM	Silcrete_Reflection_00903	I14.2.16B.41	16B	South Africa	1	Dorsal	I14	32.588	81.253	79.758	4.956	32.209	Training	Heated	Heated
904	JM	Silcrete_Reflection_00904	I14.2.16B.41	16B	South Africa	2	Dorsal	I14	40.53	73.206	68.232	11.71	38.801	Training	Heated	Heated
905	JM	Silcrete_Reflection_00905	I14.2.16B.41	16B	South Africa	3	Dorsal	I14	25.82	82.455	68.791	3.39	25.597	Training	Heated	Unheated
906	JM	Silcrete_Reflection_00906	I14.2.16B.41	16B	South Africa	4	Dorsal	I14	33.843	79.407	70.485	6.222	33.266	Training	Heated	Heated
907	JM	Silcrete_Reflection_00907	I14.2.16B.41	16B	South Africa	5	Ventral	I14	45.602	73.185	77.303	13.192	43.652	Training	Heated	Heated
908	JM	Silcrete_Reflection_00908	I14.2.16B.41	16B	South Africa	6	Ventral	I14	31.513	80.94	71.678	4.962	31.12	Training	Heated	Heated
909	JM	Silcrete_Reflection_00909	I14.2.16B.41	16B	South Africa	7	Ventral	I14	39.854	74.466	64.33	10.673	38.398	Training	Heated	Heated
910	JM	Silcrete_Reflection_00910	I14.2.16B.41	16B	South Africa	8	Ventral	I14	34.53	80.684	73.629	5.59	34.075	Training	Heated	Heated
911	JM	Silcrete_Reflection_00911	I14.2.16B.29	16B	South Africa	1	Dorsal	I14	32.018	80.237	63.174	5.429	31.554	Training	Heated	Heated
912	JM	Silcrete_Reflection_00912	I14.2.16B.29	16B	South Africa	2	Dorsal	I14	33.936	75.978	61.587	8.223	32.925	Training	Heated	Heated
913	JM	Silcrete_Reflection_00913	I14.2.16B.29	16B	South Africa	3	Dorsal	I14	39.464	77.172	75.192	8.762	38.479	Training	Heated	Heated
914	JM	Silcrete_Reflection_00914	I14.2.16B.29	16B	South Africa	4	Dorsal	I14	30.095	76.666	59.258	6.941	29.284	Training	Heated	Heated
915	JM	Silcrete_Reflection_00915	I14.2.16B.29	16B	South Africa	5	Ventral	I14	28.951	75.569	57.781	7.215	28.038	Training	Heated	Heated
916	JM	Silcrete_Reflection_00916	I14.2.16B.29	16B	South Africa	6	Ventral	I14	37.647	80.362	69.224	6.303	37.115	Training	Heated	Heated
917	JM	Silcrete_Reflection_00917	I14.2.16B.29	16B	South Africa	7	Ventral	I14	36.996	82.197	70.315	5.023	36.654	Training	Heated	Unheated
918	JM	Silcrete_Reflection_00918	I14.2.16B.29	16B	South Africa	8	Ventral	I14	32.04	74.293	58.391	8.674	30.844	Training	Heated	Heated
919	JM	Silcrete_Reflection_00919	I14.2.16B.59	16B	South Africa	1	Dorsal	I14	37.857	75.693	69.929	9.355	36.683	Training	Heated	Heated
920	JM	Silcrete_Reflection_00920	I14.2.16B.59	16B	South Africa	2	Dorsal	I14	34.659	81.826	79.253	4.928	34.307	Training	Heated	Heated
921	JM	Silcrete_Reflection_00921	I14.2.16B.59	16B	South Africa	3	Dorsal	I14	34.612	79.137	79.101	6.523	33.991	Training	Heated	Heated
922	JM	Silcrete_Reflection_00922	I14.2.16B.59	16B	South Africa	4	Dorsal	I14	37.74	74.029	71.787	10.384	36.283	Training	Heated	Heated
923	JM	Silcrete_Reflection_00923	I14.2.16B.59	16B	South Africa	5	Ventral	I14	47.348	72.165	71.769	14.501	45.073	Training	Heated	Heated
924	JM	Silcrete_Reflection_00924	I14.2.16B.59	16B	South Africa	6	Ventral	I14	37.249	73.168	63.688	10.786	35.653	Training	Heated	Heated
925	JM	Silcrete_Reflection_00925	I14.2.16B.59	16B	South Africa	7	Ventral	I14	39.252	74.199	74.981	10.688	37.769	Training	Heated	Heated
926	JM	Silcrete_Reflection_00926	I14.2.16B.59	16B	South Africa	8	Ventral	I14	42.898	73.212	74.114	12.39	41.07	Training	Heated	Heated

## Sheet: CIELab k-NN C and D Predictions
ID	Analyst	Processed Spectrum	Specimen Number	Nodule	Region	Scan	Side	Source	Model C Row Role	Model D Row role	Different row roles in the two models?	Treatment	Model C_k=5 Predictions	Model D_k=3 Predictions	# Correct Predictions
41	SK	Silcrete_Reflection_00041	D9.1.12B.25	12B	South Africa	1	Dorsal	D9	Test	Validation	Yes	Heated	Heated	Heated	2
44	SK	Silcrete_Reflection_00044	D9.1.12B.25	12B	South Africa	4	Dorsal	D9	Test	Validation	Yes	Heated	Heated	Unheated	1
46	SK	Silcrete_Reflection_00046	D9.1.12B.25	12B	South Africa	6	Ventral	D9	Test	Validation	Yes	Heated	Heated	Heated	2
47	SK	Silcrete_Reflection_00047	D9.1.12B.25	12B	South Africa	7	Ventral	D9	Test	Validation	Yes	Heated	Heated	Heated	2
48	SK	Silcrete_Reflection_00048	D9.1.12B.25	12B	South Africa	8	Ventral	D9	Test	Validation	Yes	Heated	Heated	Heated	2
50	SK	Silcrete_Reflection_00050	D9.1.10A.16	10A	South Africa	2	Dorsal	D9	Test	Validation	Yes	Unheated	Unheated	Unheated	2
51	SK	Silcrete_Reflection_00051	D9.1.10A.16	10A	South Africa	3	Dorsal	D9	Test	Validation	Yes	Unheated	Heated	Unheated	1
52	SK	Silcrete_Reflection_00052	D9.1.10A.16	10A	South Africa	4	Dorsal	D9	Test	Validation	Yes	Unheated	Heated	Unheated	1
54	SK	Silcrete_Reflection_00054	D9.1.10A.16	10A	South Africa	6	Ventral	D9	Test	Validation	Yes	Unheated	Unheated	Unheated	2
55	SK	Silcrete_Reflection_00055	D9.1.10A.16	10A	South Africa	7	Ventral	D9	Test	Validation	Yes	Unheated	Unheated	Unheated	2
56	SK	Silcrete_Reflection_00056	D9.1.10A.16	10A	South Africa	8	Ventral	D9	Test	Validation	Yes	Unheated	Heated	Unheated	1
89	JM	Silcrete_Reflection_00089	D9.1.12C.16	12C	South Africa	1	Dorsal	D9	Test	Training	Yes	Unheated	Unheated	Unheated	2
90	JM	Silcrete_Reflection_00090	D9.1.12C.16	12C	South Africa	2	Dorsal	D9	Test	Training	Yes	Unheated	Unheated	Unheated	2
91	JM	Silcrete_Reflection_00091	D9.1.12C.16	12C	South Africa	3	Dorsal	D9	Test	Training	Yes	Unheated	Unheated	Unheated	2
92	JM	Silcrete_Reflection_00092	D9.1.12C.16	12C	South Africa	4	Dorsal	D9	Test	Training	Yes	Unheated	Unheated	Unheated	2
93	JM	Silcrete_Reflection_00093	D9.1.12C.16	12C	South Africa	5	Ventral	D9	Test	Training	Yes	Unheated	Unheated	Unheated	2
94	JM	Silcrete_Reflection_00094	D9.1.12C.16	12C	South Africa	6	Ventral	D9	Test	Training	Yes	Unheated	Unheated	Unheated	2
95	JM	Silcrete_Reflection_00095	D9.1.12C.16	12C	South Africa	7	Ventral	D9	Test	Training	Yes	Unheated	Unheated	Unheated	2
96	JM	Silcrete_Reflection_00096	D9.1.12C.16	12C	South Africa	8	Ventral	D9	Test	Training	Yes	Unheated	Unheated	Unheated	2
121	SK	Silcrete_Reflection_00121	E3.1.1B.37	1B	South Africa	1	Dorsal	E3	Test	Training	Yes	Heated	Heated	Heated	2
122	SK	Silcrete_Reflection_00122	E3.1.1B.37	1B	South Africa	2	Dorsal	E3	Test	Training	Yes	Heated	Heated	Heated	2
123	SK	Silcrete_Reflection_00123	E3.1.1B.37	1B	South Africa	3	Dorsal	E3	Test	Training	Yes	Heated	Heated	Unheated	1
124	SK	Silcrete_Reflection_00124	E3.1.1B.37	1B	South Africa	4	Dorsal	E3	Test	Training	Yes	Heated	Heated	Heated	2
125	SK	Silcrete_Reflection_00125	E3.1.1B.37	1B	South Africa	5	Ventral	E3	Test	Training	Yes	Heated	Heated	Heated	2
126	SK	Silcrete_Reflection_00126	E3.1.1B.37	1B	South Africa	6	Ventral	E3	Test	Training	Yes	Heated	Heated	Heated	2
127	SK	Silcrete_Reflection_00127	E3.1.1B.37	1B	South Africa	7	Ventral	E3	Test	Training	Yes	Heated	Heated	Heated	2
128	SK	Silcrete_Reflection_00128	E3.1.1B.37	1B	South Africa	8	Ventral	E3	Test	Training	Yes	Heated	Heated	Heated	2
225	SK	Silcrete_Reflection_00225	I14.2.16E.6	16B	South Africa	1	Dorsal	I14	Test	Training	Yes	Heated	Heated	Heated	2
226	SK	Silcrete_Reflection_00226	I14.2.16E.6	16B	South Africa	2	Dorsal	I14	Test	Training	Yes	Heated	Heated	Heated	2
227	SK	Silcrete_Reflection_00227	I14.2.16E.6	16B	South Africa	3	Dorsal	I14	Test	Training	Yes	Heated	Heated	Unheated	1
228	SK	Silcrete_Reflection_00228	I14.2.16E.6	16B	South Africa	4	Dorsal	I14	Test	Training	Yes	Heated	Heated	Heated	2
229	SK	Silcrete_Reflection_00229	I14.2.16E.6	16B	South Africa	5	Ventral	I14	Test	Training	Yes	Heated	Heated	Unheated	1
230	SK	Silcrete_Reflection_00230	I14.2.16E.6	16B	South Africa	6	Ventral	I14	Test	Training	Yes	Heated	Unheated	Unheated	0
231	SK	Silcrete_Reflection_00231	I14.2.16E.6	16B	South Africa	7	Ventral	I14	Test	Training	Yes	Heated	Unheated	Unheated	0
232	SK	Silcrete_Reflection_00232	I14.2.16E.6	16B	South Africa	8	Ventral	I14	Test	Training	Yes	Heated	Heated	Heated	2
439	ET	Silcrete_Reflection_00439	E3.1.6C.5	6C	South Africa	1	Dorsal	E3	Test	Training	Yes	Heated	Heated	Heated	2
440	ET	Silcrete_Reflection_00440	E3.1.6C.5	6C	South Africa	2	Dorsal	E3	Test	Training	Yes	Heated	Heated	Heated	2
441	ET	Silcrete_Reflection_00441	E3.1.6C.5	6C	South Africa	3	Dorsal	E3	Test	Training	Yes	Heated	Heated	Heated	2
442	ET	Silcrete_Reflection_00442	E3.1.6C.5	6C	South Africa	4	Dorsal	E3	Test	Training	Yes	Heated	Unheated	Unheated	0
443	ET	Silcrete_Reflection_00443	E3.1.6C.5	6C	South Africa	5	Ventral	E3	Test	Training	Yes	Heated	Unheated	Heated	1
444	ET	Silcrete_Reflection_00444	E3.1.6C.5	6C	South Africa	6	Ventral	E3	Test	Training	Yes	Heated	Heated	Heated	2
445	ET	Silcrete_Reflection_00445	E3.1.6C.5	6C	South Africa	7	Ventral	E3	Test	Training	Yes	Heated	Heated	Heated	2
446	ET	Silcrete_Reflection_00446	E3.1.6C.5	6C	South Africa	8	Ventral	E3	Test	Training	Yes	Heated	Heated	Heated	2
639	JM	Silcrete_Reflection_00639	D9.1.12A.38	12A	South Africa	1	Dorsal	D9	Test	Training	Yes	Unheated	Unheated	Unheated	2
640	JM	Silcrete_Reflection_00640	D9.1.12A.38	12A	South Africa	2	Dorsal	D9	Test	Training	Yes	Unheated	Unheated	Unheated	2
641	JM	Silcrete_Reflection_00641	D9.1.12A.38	12A	South Africa	3	Dorsal	D9	Test	Training	Yes	Unheated	Unheated	Unheated	2
642	JM	Silcrete_Reflection_00642	D9.1.12A.38	12A	South Africa	4	Dorsal	D9	Test	Training	Yes	Unheated	Unheated	Unheated	2
643	JM	Silcrete_Reflection_00643	D9.1.12A.38	12A	South Africa	5	Ventral	D9	Test	Training	Yes	Unheated	Unheated	Unheated	2
644	JM	Silcrete_Reflection_00644	D9.1.12A.38	12A	South Africa	6	Ventral	D9	Test	Training	Yes	Unheated	Unheated	Unheated	2
645	JM	Silcrete_Reflection_00645	D9.1.12A.38	12A	South Africa	7	Ventral	D9	Test	Training	Yes	Unheated	Unheated	Unheated	2
646	JM	Silcrete_Reflection_00646	D9.1.12A.38	12A	South Africa	8	Ventral	D9	Test	Training	Yes	Unheated	Unheated	Unheated	2
751	JM	Silcrete_Reflection_00751	E3.1.1A.48	1A	South Africa	1	Dorsal	E3	Test	Training	Yes	Unheated	Unheated	Unheated	2
752	JM	Silcrete_Reflection_00752	E3.1.1A.48	1A	South Africa	2	Dorsal	E3	Test	Training	Yes	Unheated	Unheated	Unheated	2
753	JM	Silcrete_Reflection_00753	E3.1.1A.48	1A	South Africa	3	Dorsal	E3	Test	Training	Yes	Unheated	Unheated	Unheated	2
754	JM	Silcrete_Reflection_00754	E3.1.1A.48	1A	South Africa	4	Dorsal	E3	Test	Training	Yes	Unheated	Unheated	Unheated	2
755	JM	Silcrete_Reflection_00755	E3.1.1A.48	1A	South Africa	5	Ventral	E3	Test	Training	Yes	Unheated	Unheated	Unheated	2
756	JM	Silcrete_Reflection_00756	E3.1.1A.48	1A	South Africa	6	Ventral	E3	Test	Training	Yes	Unheated	Unheated	Unheated	2
757	JM	Silcrete_Reflection_00757	E3.1.1A.48	1A	South Africa	7	Ventral	E3	Test	Training	Yes	Unheated	Unheated	Unheated	2
759	JM	Silcrete_Reflection_00759	E3.1.1A.14	1A	South Africa	1	Dorsal	E3	Test	Training	Yes	Unheated	Unheated	Unheated	2
760	JM	Silcrete_Reflection_00760	E3.1.1A.14	1A	South Africa	2	Dorsal	E3	Test	Training	Yes	Unheated	Unheated	Unheated	2
761	JM	Silcrete_Reflection_00761	E3.1.1A.14	1A	South Africa	3	Dorsal	E3	Test	Training	Yes	Unheated	Heated	Unheated	1
762	JM	Silcrete_Reflection_00762	E3.1.1A.14	1A	South Africa	4	Dorsal	E3	Test	Training	Yes	Unheated	Heated	Unheated	1
763	JM	Silcrete_Reflection_00763	E3.1.1A.14	1A	South Africa	5	Ventral	E3	Test	Training	Yes	Unheated	Unheated	Unheated	2
764	JM	Silcrete_Reflection_00764	E3.1.1A.14	1A	South Africa	6	Ventral	E3	Test	Training	Yes	Unheated	Unheated	Unheated	2
765	JM	Silcrete_Reflection_00765	E3.1.1A.14	1A	South Africa	7	Ventral	E3	Test	Training	Yes	Unheated	Unheated	Heated	1
766	JM	Silcrete_Reflection_00766	E3.1.1A.14	1A	South Africa	8	Ventral	E3	Test	Training	Yes	Unheated	Unheated	Unheated	2
839	JM	Silcrete_Reflection_00839	I14.2.16A.44	16A	South Africa	1	Dorsal	I14	Test	Training	Yes	Unheated	Unheated	Heated	1
840	JM	Silcrete_Reflection_00840	I14.2.16A.44	16A	South Africa	2	Dorsal	I14	Test	Training	Yes	Unheated	Unheated	Unheated	2
841	JM	Silcrete_Reflection_00841	I14.2.16A.44	16A	South Africa	3	Dorsal	I14	Test	Training	Yes	Unheated	Unheated	Unheated	2
842	JM	Silcrete_Reflection_00842	I14.2.16A.44	16A	South Africa	4	Dorsal	I14	Test	Training	Yes	Unheated	Unheated	Unheated	2
843	JM	Silcrete_Reflection_00843	I14.2.16A.44	16A	South Africa	5	Ventral	I14	Test	Training	Yes	Unheated	Unheated	Unheated	2
844	JM	Silcrete_Reflection_00844	I14.2.16A.44	16A	South Africa	6	Ventral	I14	Test	Training	Yes	Unheated	Unheated	Unheated	2
845	JM	Silcrete_Reflection_00845	I14.2.16A.44	16A	South Africa	7	Ventral	I14	Test	Training	Yes	Unheated	Unheated	Unheated	2
846	JM	Silcrete_Reflection_00846	I14.2.16A.44	16A	South Africa	8	Ventral	I14	Test	Training	Yes	Unheated	Unheated	Unheated	2
847	JM	Silcrete_Reflection_00847	I14.2.16B.10	16B	South Africa	1	Dorsal	I14	Test	Training	Yes	Heated	Heated	Heated	2
848	JM	Silcrete_Reflection_00848	I14.2.16B.10	16B	South Africa	2	Dorsal	I14	Test	Training	Yes	Heated	Heated	Heated	2
849	JM	Silcrete_Reflection_00849	I14.2.16B.10	16B	South Africa	3	Dorsal	I14	Test	Training	Yes	Heated	Heated	Heated	2
850	JM	Silcrete_Reflection_00850	I14.2.16B.10	16B	South Africa	4	Dorsal	I14	Test	Training	Yes	Heated	Heated	Heated	2
851	JM	Silcrete_Reflection_00851	I14.2.16B.10	16B	South Africa	5	Ventral	I14	Test	Training	Yes	Heated	Heated	Heated	2
852	JM	Silcrete_Reflection_00852	I14.2.16B.10	16B	South Africa	6	Ventral	I14	Test	Training	Yes	Heated	Heated	Heated	2
853	JM	Silcrete_Reflection_00853	I14.2.16B.10	16B	South Africa	7	Ventral	I14	Test	Training	Yes	Heated	Heated	Heated	2
854	JM	Silcrete_Reflection_00854	I14.2.16B.10	16B	South Africa	8	Ventral	I14	Test	Training	Yes	Heated	Heated	Heated	2
1	SK	Silcrete_Reflection_00001	D9.1.10B.31	10B	South Africa	1	Dorsal	D9	Training	Training	No	Heated	Heated	Heated	2
3	SK	Silcrete_Reflection_00003	D9.1.10B.31	10B	South Africa	3	Dorsal	D9	Training	Training	No	Heated	Heated	Heated	2
4	SK	Silcrete_Reflection_00004	D9.1.10B.31	10B	South Africa	4	Dorsal	D9	Training	Training	No	Heated	Heated	Heated	2
5	SK	Silcrete_Reflection_00005	D9.1.10B.31	10B	South Africa	5	Ventral	D9	Training	Training	No	Heated	Heated	Heated	2
7	SK	Silcrete_Reflection_00007	D9.1.10B.31	10B	South Africa	7	Ventral	D9	Training	Training	No	Heated	Heated	Heated	2
8	SK	Silcrete_Reflection_00008	D9.1.10B.31	10B	South Africa	8	Ventral	D9	Training	Training	No	Heated	Heated	Heated	2
9	SK	Silcrete_Reflection_00009	D9.1.10B.39	10B	South Africa	1	Dorsal	D9	Training	Test	Yes	Heated	Heated	Heated	2
10	SK	Silcrete_Reflection_00010	D9.1.10B.39	10B	South Africa	2	Dorsal	D9	Training	Test	Yes	Heated	Heated	Heated	2
11	SK	Silcrete_Reflection_00011	D9.1.10B.39	10B	South Africa	3	Dorsal	D9	Training	Test	Yes	Heated	Heated	Heated	2
12	SK	Silcrete_Reflection_00012	D9.1.10B.39	10B	South Africa	4	Dorsal	D9	Training	Test	Yes	Heated	Heated	Heated	2
13	SK	Silcrete_Reflection_00013	D9.1.10B.39	10B	South Africa	5	Ventral	D9	Training	Test	Yes	Heated	Heated	Heated	2
14	SK	Silcrete_Reflection_00014	D9.1.10B.39	10B	South Africa	6	Ventral	D9	Training	Test	Yes	Heated	Heated	Heated	2
15	SK	Silcrete_Reflection_00015	D9.1.10B.39	10B	South Africa	7	Ventral	D9	Training	Test	Yes	Heated	Heated	Heated	2
16	SK	Silcrete_Reflection_00016	D9.1.10B.39	10B	South Africa	8	Ventral	D9	Training	Test	Yes	Heated	Heated	Heated	2
17	JM	Silcrete_Reflection_00017	D9.1.12D.49	12D	South Africa	1	Dorsal	D9	Training	Training	No	Heated	Unheated	Unheated	0
18	JM	Silcrete_Reflection_00018	D9.1.12D.49	12D	South Africa	2	Dorsal	D9	Training	Training	No	Heated	Unheated	Unheated	0
19	JM	Silcrete_Reflection_00019	D9.1.12D.49	12D	South Africa	3	Dorsal	D9	Training	Training	No	Heated	Heated	Heated	2
20	JM	Silcrete_Reflection_00020	D9.1.12D.49	12D	South Africa	4	Dorsal	D9	Training	Training	No	Heated	Heated	Heated	2
21	JM	Silcrete_Reflection_00021	D9.1.12D.49	12D	South Africa	5	Ventral	D9	Training	Training	No	Heated	Unheated	Unheated	0
22	JM	Silcrete_Reflection_00022	D9.1.12D.49	12D	South Africa	6	Ventral	D9	Training	Training	No	Heated	Heated	Heated	2
23	JM	Silcrete_Reflection_00023	D9.1.12D.49	12D	South Africa	7	Ventral	D9	Training	Training	No	Heated	Unheated	Unheated	0
24	JM	Silcrete_Reflection_00024	D9.1.12D.49	12D	South Africa	8	Ventral	D9	Training	Training	No	Heated	Unheated	Unheated	0
25	JM	Silcrete_Reflection_00025	D9.1.12D.50	12D	South Africa	1	Dorsal	D9	Training	Training	No	Heated	Unheated	Unheated	0
26	JM	Silcrete_Reflection_00026	D9.1.12D.50	12D	South Africa	2	Dorsal	D9	Training	Training	No	Heated	Unheated	Heated	1
27	JM	Silcrete_Reflection_00027	D9.1.12D.50	12D	South Africa	3	Dorsal	D9	Training	Training	No	Heated	Heated	Heated	2
28	JM	Silcrete_Reflection_00028	D9.1.12D.50	12D	South Africa	4	Dorsal	D9	Training	Training	No	Heated	Unheated	Unheated	0
29	JM	Silcrete_Reflection_00029	D9.1.12D.50	12D	South Africa	5	Ventral	D9	Training	Training	No	Heated	Heated	Heated	2
30	JM	Silcrete_Reflection_00030	D9.1.12D.50	12D	South Africa	6	Ventral	D9	Training	Training	No	Heated	Heated	Heated	2
31	JM	Silcrete_Reflection_00031	D9.1.12D.50	12D	South Africa	7	Ventral	D9	Training	Training	No	Heated	Heated	Heated	2
32	JM	Silcrete_Reflection_00032	D9.1.12D.50	12D	South Africa	8	Ventral	D9	Training	Training	No	Heated	Unheated	Unheated	0
57	SK	Silcrete_Reflection_00057	D9.1.12D.50	12D	South Africa	1	Dorsal	D9	Training	Training	No	Heated	Unheated	Unheated	0
59	SK	Silcrete_Reflection_00059	D9.1.12D.50	12D	South Africa	3	Dorsal	D9	Training	Training	No	Heated	Heated	Heated	2
61	SK	Silcrete_Reflection_00061	D9.1.12D.50	12D	South Africa	5	Ventral	D9	Training	Training	No	Heated	Heated	Heated	2
62	SK	Silcrete_Reflection_00062	D9.1.12D.50	12D	South Africa	6	Ventral	D9	Training	Training	No	Heated	Heated	Heated	2
63	SK	Silcrete_Reflection_00063	D9.1.12D.50	12D	South Africa	7	Ventral	D9	Training	Training	No	Heated	Unheated	Unheated	0
64	SK	Silcrete_Reflection_00064	D9.1.12D.50	12D	South Africa	8	Ventral	D9	Training	Training	No	Heated	Unheated	Unheated	0
65	SK	Silcrete_Reflection_00065	D9.1.12C.8	12C	South Africa	1	Dorsal	D9	Training	Training	No	Unheated	Heated	Unheated	1
66	SK	Silcrete_Reflection_00066	D9.1.12C.8	12C	South Africa	2	Dorsal	D9	Training	Training	No	Unheated	Unheated	Unheated	2
67	SK	Silcrete_Reflection_00067	D9.1.12C.8	12C	South Africa	3	Dorsal	D9	Training	Training	No	Unheated	Unheated	Unheated	2
68	SK	Silcrete_Reflection_00068	D9.1.12C.8	12C	South Africa	4	Dorsal	D9	Training	Training	No	Unheated	Unheated	Heated	1
69	SK	Silcrete_Reflection_00069	D9.1.12C.8	12C	South Africa	5	Ventral	D9	Training	Training	No	Unheated	Unheated	Unheated	2
70	SK	Silcrete_Reflection_00070	D9.1.12C.8	12C	South Africa	6	Ventral	D9	Training	Training	No	Unheated	Unheated	Unheated	2
71	SK	Silcrete_Reflection_00071	D9.1.12C.8	12C	South Africa	7	Ventral	D9	Training	Training	No	Unheated	Heated	Unheated	1
72	SK	Silcrete_Reflection_00072	D9.1.12C.8	12C	South Africa	8	Ventral	D9	Training	Training	No	Unheated	Unheated	Unheated	2
73	SK	Silcrete_Reflection_00073	E3.1.1B.8	1B	South Africa	1	Dorsal	E3	Training	Training	No	Heated	Heated	Heated	2
74	SK	Silcrete_Reflection_00074	E3.1.1B.8	1B	South Africa	2	Dorsal	E3	Training	Training	No	Heated	Heated	Heated	2
75	SK	Silcrete_Reflection_00075	E3.1.1B.8	1B	South Africa	3	Dorsal	E3	Training	Training	No	Heated	Heated	Heated	2
76	SK	Silcrete_Reflection_00076	E3.1.1B.8	1B	South Africa	4	Dorsal	E3	Training	Training	No	Heated	Heated	Heated	2
77	SK	Silcrete_Reflection_00077	E3.1.1B.8	1B	South Africa	5	Ventral	E3	Training	Training	No	Heated	Heated	Heated	2
78	SK	Silcrete_Reflection_00078	E3.1.1B.8	1B	South Africa	6	Ventral	E3	Training	Training	No	Heated	Heated	Heated	2
79	SK	Silcrete_Reflection_00079	E3.1.1B.8	1B	South Africa	7	Ventral	E3	Training	Training	No	Heated	Heated	Heated	2
80	SK	Silcrete_Reflection_00080	E3.1.1B.8	1B	South Africa	8	Ventral	E3	Training	Training	No	Heated	Heated	Heated	2
81	JM	Silcrete_Reflection_00081	E3.1.1B.18	1B	South Africa	1	Dorsal	E3	Training	Training	No	Heated	Heated	Heated	2
82	JM	Silcrete_Reflection_00082	E3.1.1B.18	1B	South Africa	2	Dorsal	E3	Training	Training	No	Heated	Heated	Heated	2
83	JM	Silcrete_Reflection_00083	E3.1.1B.18	1B	South Africa	3	Dorsal	E3	Training	Training	No	Heated	Heated	Heated	2
84	JM	Silcrete_Reflection_00084	E3.1.1B.18	1B	South Africa	4	Dorsal	E3	Training	Training	No	Heated	Heated	Heated	2
85	JM	Silcrete_Reflection_00085	E3.1.1B.18	1B	South Africa	5	Ventral	E3	Training	Training	No	Heated	Heated	Heated	2
86	JM	Silcrete_Reflection_00086	E3.1.1B.18	1B	South Africa	6	Ventral	E3	Training	Training	No	Heated	Heated	Heated	2
87	JM	Silcrete_Reflection_00087	E3.1.1B.18	1B	South Africa	7	Ventral	E3	Training	Training	No	Heated	Heated	Heated	2
88	JM	Silcrete_Reflection_00088	E3.1.1B.18	1B	South Africa	8	Ventral	E3	Training	Training	No	Heated	Heated	Heated	2
105	SK	Silcrete_Reflection_00105	E3.1.6C.4	6C	South Africa	1	Dorsal	E3	Training	Training	No	Heated	Heated	Heated	2
106	SK	Silcrete_Reflection_00106	E3.1.6C.4	6C	South Africa	2	Dorsal	E3	Training	Training	No	Heated	Heated	Heated	2
107	SK	Silcrete_Reflection_00107	E3.1.6C.4	6C	South Africa	3	Dorsal	E3	Training	Training	No	Heated	Heated	Heated	2
108	SK	Silcrete_Reflection_00108	E3.1.6C.4	6C	South Africa	4	Dorsal	E3	Training	Training	No	Heated	Heated	Heated	2
109	SK	Silcrete_Reflection_00109	E3.1.6C.4	6C	South Africa	5	Ventral	E3	Training	Training	No	Heated	Heated	Heated	2
110	SK	Silcrete_Reflection_00110	E3.1.6C.4	6C	South Africa	6	Ventral	E3	Training	Training	No	Heated	Heated	Heated	2
111	SK	Silcrete_Reflection_00111	E3.1.6C.4	6C	South Africa	7	Ventral	E3	Training	Training	No	Heated	Unheated	Heated	1
112	SK	Silcrete_Reflection_00112	E3.1.6C.4	6C	South Africa	8	Ventral	E3	Training	Training	No	Heated	Heated	Heated	2
113	SK	Silcrete_Reflection_00113	E3.1.1B.27	1b	South Africa	1	Dorsal	E3	Training	Test	Yes	Heated	Heated	Heated	2
114	SK	Silcrete_Reflection_00114	E3.1.1B.27	1b	South Africa	2	Dorsal	E3	Training	Test	Yes	Heated	Heated	Heated	2
115	SK	Silcrete_Reflection_00115	E3.1.1B.27	1b	South Africa	3	Dorsal	E3	Training	Test	Yes	Heated	Heated	Heated	2
116	SK	Silcrete_Reflection_00116	E3.1.1B.27	1b	South Africa	4	Dorsal	E3	Training	Test	Yes	Heated	Heated	Heated	2
117	SK	Silcrete_Reflection_00117	E3.1.1B.27	1b	South Africa	5	Ventral	E3	Training	Test	Yes	Heated	Heated	Heated	2
118	SK	Silcrete_Reflection_00118	E3.1.1B.27	1b	South Africa	6	Ventral	E3	Training	Test	Yes	Heated	Heated	Heated	2
119	SK	Silcrete_Reflection_00119	E3.1.1B.27	1b	South Africa	7	Ventral	E3	Training	Test	Yes	Heated	Heated	Heated	2
120	SK	Silcrete_Reflection_00120	E3.1.1B.27	1b	South Africa	8	Ventral	E3	Training	Test	Yes	Heated	Heated	Heated	2
123	SK	Silcrete_Reflection_00213	E3.1.1A.5	1A	South Africa	5	Ventral	E3	Training	Training	No	Unheated	Unheated	Heated	1
129	SK	Silcrete_Reflection_00129	I14.2.16A.17	16A	South Africa	1	Dorsal	I14	Training	Training	No	Unheated	Unheated	Unheated	2
130	SK	Silcrete_Reflection_00130	I14.2.16A.17	16A	South Africa	2	Dorsal	I14	Training	Training	No	Unheated	Unheated	Unheated	2
131	SK	Silcrete_Reflection_00131	I14.2.16A.17	16A	South Africa	3	Dorsal	I14	Training	Training	No	Unheated	Unheated	Unheated	2
132	SK	Silcrete_Reflection_00132	I14.2.16A.17	16A	South Africa	4	Dorsal	I14	Training	Training	No	Unheated	Unheated	Unheated	2
133	SK	Silcrete_Reflection_00133	I14.2.16A.17	16A	South Africa	5	Ventral	I14	Training	Training	No	Unheated	Unheated	Unheated	2
134	SK	Silcrete_Reflection_00134	I14.2.16A.17	16A	South Africa	6	Ventral	I14	Training	Training	No	Unheated	Unheated	Unheated	2
135	SK	Silcrete_Reflection_00135	I14.2.16A.17	16A	South Africa	7	Ventral	I14	Training	Training	No	Unheated	Unheated	Unheated	2
136	SK	Silcrete_Reflection_00136	I14.2.16A.17	16A	South Africa	8	Ventral	I14	Training	Training	No	Unheated	Unheated	Unheated	2
145	SK	Silcrete_Reflection_00145	I14.2.16A.18	16A	South Africa	1	Dorsal	I14	Training	Test	Yes	Unheated	Unheated	Unheated	2
146	SK	Silcrete_Reflection_00146	I14.2.16A.18	16A	South Africa	2	Dorsal	I14	Training	Test	Yes	Unheated	Unheated	Unheated	2
147	SK	Silcrete_Reflection_00147	I14.2.16A.18	16A	South Africa	3	Dorsal	I14	Training	Test	Yes	Unheated	Unheated	Unheated	2
148	SK	Silcrete_Reflection_00148	I14.2.16A.18	16A	South Africa	4	Dorsal	I14	Training	Test	Yes	Unheated	Unheated	Unheated	2
150	SK	Silcrete_Reflection_00150	I14.2.16A.18	16A	South Africa	6	Ventral	I14	Training	Test	Yes	Unheated	Unheated	Unheated	2
151	SK	Silcrete_Reflection_00151	I14.2.16A.18	16A	South Africa	7	Ventral	I14	Training	Test	Yes	Unheated	Unheated	Unheated	2
153	JM	Silcrete_Reflection_00153	I14.2.16B.8	16B	South Africa	1	Dorsal	I14	Training	Training	No	Heated	Unheated	Heated	1
154	JM	Silcrete_Reflection_00154	I14.2.16B.8	16B	South Africa	2	Dorsal	I14	Training	Training	No	Heated	Heated	Heated	2
155	JM	Silcrete_Reflection_00155	I14.2.16B.8	16B	South Africa	3	Dorsal	I14	Training	Training	No	Heated	Heated	Unheated	1
156	JM	Silcrete_Reflection_00156	I14.2.16B.8	16B	South Africa	4	Dorsal	I14	Training	Training	No	Heated	Unheated	Unheated	0
157	JM	Silcrete_Reflection_00157	I14.2.16B.8	16B	South Africa	5	Ventral	I14	Training	Training	No	Heated	Unheated	Unheated	0
158	JM	Silcrete_Reflection_00158	I14.2.16B.8	16B	South Africa	6	Ventral	I14	Training	Training	No	Heated	Unheated	Unheated	0
159	JM	Silcrete_Reflection_00159	I14.2.16B.8	16B	South Africa	7	Ventral	I14	Training	Training	No	Heated	Unheated	Heated	1
160	JM	Silcrete_Reflection_00160	I14.2.16B.8	16B	South Africa	8	Ventral	I14	Training	Training	No	Heated	Unheated	Unheated	0
161	JM	Silcrete_Reflection_00161	I14.2.16A.20	16A	South Africa	1	Dorsal	I14	Training	Training	No	Unheated	Unheated	Heated	1
162	JM	Silcrete_Reflection_00162	I14.2.16A.20	16A	South Africa	2	Dorsal	I14	Training	Training	No	Unheated	Unheated	Unheated	2
163	JM	Silcrete_Reflection_00163	I14.2.16A.20	16A	South Africa	3	Dorsal	I14	Training	Training	No	Unheated	Unheated	Unheated	2
164	JM	Silcrete_Reflection_00164	I14.2.16A.20	16A	South Africa	4	Dorsal	I14	Training	Training	No	Unheated	Heated	Unheated	1
165	JM	Silcrete_Reflection_00165	I14.2.16A.20	16A	South Africa	5	Ventral	I14	Training	Training	No	Unheated	Unheated	Unheated	2
166	JM	Silcrete_Reflection_00166	I14.2.16A.20	16A	South Africa	6	Ventral	I14	Training	Training	No	Unheated	Unheated	Unheated	2
167	JM	Silcrete_Reflection_00167	I14.2.16A.20	16A	South Africa	7	Ventral	I14	Training	Training	No	Unheated	Unheated	Unheated	2
168	JM	Silcrete_Reflection_00168	I14.2.16A.20	16A	South Africa	8	Ventral	I14	Training	Training	No	Unheated	Unheated	Unheated	2
169	JM	Silcrete_Reflection_00169	E3.1.6B.19	6B	South Africa	1	Dorsal	E3	Training	Training	No	Unheated	Unheated	Unheated	2
170	JM	Silcrete_Reflection_00170	E3.1.6B.19	6B	South Africa	2	Dorsal	E3	Training	Training	No	Unheated	Heated	Heated	0
171	JM	Silcrete_Reflection_00171	E3.1.6B.19	6B	South Africa	3	Dorsal	E3	Training	Training	No	Unheated	Unheated	Unheated	2
172	JM	Silcrete_Reflection_00172	E3.1.6B.19	6B	South Africa	4	Dorsal	E3	Training	Training	No	Unheated	Heated	Unheated	1
173	JM	Silcrete_Reflection_00173	E3.1.6B.19	6B	South Africa	5	Ventral	E3	Training	Training	No	Unheated	Heated	Heated	0
174	JM	Silcrete_Reflection_00174	E3.1.6B.19	6B	South Africa	6	Ventral	E3	Training	Training	No	Unheated	Unheated	Unheated	2
175	JM	Silcrete_Reflection_00175	E3.1.6B.19	6B	South Africa	7	Ventral	E3	Training	Training	No	Unheated	Unheated	Unheated	2
176	JM	Silcrete_Reflection_00176	E3.1.6B.19	6B	South Africa	8	Ventral	E3	Training	Training	No	Unheated	Unheated	Unheated	2
177	JM	Silcrete_Reflection_00177	I14.2.16B.43	16B	South Africa	1	Dorsal	I14	Training	Training	No	Heated	Heated	Heated	2
178	JM	Silcrete_Reflection_00178	I14.2.16B.43	16B	South Africa	2	Dorsal	I14	Training	Training	No	Heated	Heated	Heated	2
179	JM	Silcrete_Reflection_00179	I14.2.16B.43	16B	South Africa	3	Dorsal	I14	Training	Training	No	Heated	Heated	Heated	2
180	JM	Silcrete_Reflection_00180	I14.2.16B.43	16B	South Africa	4	Dorsal	I14	Training	Training	No	Heated	Heated	Heated	2
182	JM	Silcrete_Reflection_00182	I14.2.16B.43	16B	South Africa	6	Ventral	I14	Training	Training	No	Heated	Heated	Heated	2
183	JM	Silcrete_Reflection_00183	I14.2.16B.43	16B	South Africa	7	Ventral	I14	Training	Training	No	Heated	Heated	Heated	2
184	JM	Silcrete_Reflection_00184	I14.2.16B.43	16B	South Africa	8	Ventral	I14	Training	Training	No	Heated	Unheated	Unheated	0
185	JM	Silcrete_Reflection_00185	I14.2.16A.24	16A	South Africa	1	Dorsal	I14	Training	Training	No	Unheated	Unheated	Unheated	2
186	JM	Silcrete_Reflection_00186	I14.2.16A.24	16A	South Africa	2	Dorsal	I14	Training	Training	No	Unheated	Unheated	Unheated	2
187	JM	Silcrete_Reflection_00187	I14.2.16A.24	16A	South Africa	3	Dorsal	I14	Training	Training	No	Unheated	Unheated	Unheated	2
188	JM	Silcrete_Reflection_00188	I14.2.16A.24	16A	South Africa	4	Dorsal	I14	Training	Training	No	Unheated	Unheated	Unheated	2
189	JM	Silcrete_Reflection_00189	I14.2.16A.24	16A	South Africa	5	Ventral	I14	Training	Training	No	Unheated	Unheated	Heated	1
190	JM	Silcrete_Reflection_00190	I14.2.16A.24	16A	South Africa	6	Ventral	I14	Training	Training	No	Unheated	Unheated	Unheated	2
192	JM	Silcrete_Reflection_00192	I14.2.16A.24	16A	South Africa	8	Ventral	I14	Training	Training	No	Unheated	Unheated	Unheated	2
193	JM	Silcrete_Reflection_00193	I14.2.16B.50	16B	South Africa	1	Dorsal	I14	Training	Validation	Yes	Heated	Heated	Heated	2
194	JM	Silcrete_Reflection_00194	I14.2.16B.50	16B	South Africa	2	Dorsal	I14	Training	Validation	Yes	Heated	Heated	Unheated	1
195	JM	Silcrete_Reflection_00195	I14.2.16B.50	16B	South Africa	3	Dorsal	I14	Training	Validation	Yes	Heated	Heated	Heated	2
196	JM	Silcrete_Reflection_00196	I14.2.16B.50	16B	South Africa	4	Dorsal	I14	Training	Validation	Yes	Heated	Heated	Heated	2
197	JM	Silcrete_Reflection_00197	I14.2.16B.50	16B	South Africa	5	Ventral	I14	Training	Validation	Yes	Heated	Heated	Heated	2
198	JM	Silcrete_Reflection_00198	I14.2.16B.50	16B	South Africa	6	Ventral	I14	Training	Validation	Yes	Heated	Heated	Heated	2
199	JM	Silcrete_Reflection_00199	I14.2.16B.50	16B	South Africa	7	Ventral	I14	Training	Validation	Yes	Heated	Unheated	Unheated	0
200	JM	Silcrete_Reflection_00200	I14.2.16B.50	16B	South Africa	8	Ventral	I14	Training	Validation	Yes	Heated	Heated	Heated	2
201	JM	Silcrete_Reflection_00201	I14.2.16A.9	16A	South Africa	1	Dorsal	I14	Training	Training	No	Unheated	Unheated	Unheated	2
202	JM	Silcrete_Reflection_00202	I14.2.16A.9	16A	South Africa	2	Dorsal	I14	Training	Training	No	Unheated	Unheated	Unheated	2
203	JM	Silcrete_Reflection_00203	I14.2.16A.9	16A	South Africa	3	Dorsal	I14	Training	Training	No	Unheated	Unheated	Unheated	2
204	JM	Silcrete_Reflection_00204	I14.2.16A.9	16A	South Africa	4	Dorsal	I14	Training	Training	No	Unheated	Unheated	Unheated	2
205	JM	Silcrete_Reflection_00205	I14.2.16A.9	16A	South Africa	5	Ventral	I14	Training	Training	No	Unheated	Unheated	Unheated	2
206	JM	Silcrete_Reflection_00206	I14.2.16A.9	16A	South Africa	6	Ventral	I14	Training	Training	No	Unheated	Unheated	Unheated	2
207	JM	Silcrete_Reflection_00207	I14.2.16A.9	16A	South Africa	7	Ventral	I14	Training	Training	No	Unheated	Unheated	Unheated	2
208	JM	Silcrete_Reflection_00208	I14.2.16A.9	16A	South Africa	8	Ventral	I14	Training	Training	No	Unheated	Unheated	Unheated	2
209	SK	Silcrete_Reflection_00209	E3.1.1A.5	1A	South Africa	1	Dorsal	E3	Training	Training	No	Unheated	Unheated	Unheated	2
210	SK	Silcrete_Reflection_00210	E3.1.1A.5	1A	South Africa	2	Dorsal	E3	Training	Training	No	Unheated	Unheated	Unheated	2
211	SK	Silcrete_Reflection_00211	E3.1.1A.5	1A	South Africa	3	Dorsal	E3	Training	Training	No	Unheated	Unheated	Unheated	2
212	SK	Silcrete_Reflection_00212	E3.1.1A.5	1A	South Africa	4	Dorsal	E3	Training	Training	No	Unheated	Unheated	Unheated	2
214	SK	Silcrete_Reflection_00214	E3.1.1A.5	1A	South Africa	6	Ventral	E3	Training	Training	No	Unheated	Unheated	Unheated	2
215	SK	Silcrete_Reflection_00215	E3.1.1A.5	1A	South Africa	7	Ventral	E3	Training	Training	No	Unheated	Unheated	Unheated	2
216	SK	Silcrete_Reflection_00216	E3.1.1A.5	1A	South Africa	8	Ventral	E3	Training	Training	No	Unheated	Unheated	Unheated	2
233	SK	Silcrete_Reflection_00233	E3.1.6B.21	6B	South Africa	1	Dorsal	E3	Training	Training	No	Unheated	Unheated	Heated	1
234	SK	Silcrete_Reflection_00234	E3.1.6B.21	6B	South Africa	2	Dorsal	E3	Training	Training	No	Unheated	Heated	Unheated	1
235	SK	Silcrete_Reflection_00235	E3.1.6B.21	6B	South Africa	3	Dorsal	E3	Training	Training	No	Unheated	Heated	Heated	0
236	SK	Silcrete_Reflection_00236	E3.1.6B.21	6B	South Africa	4	Dorsal	E3	Training	Training	No	Unheated	Unheated	Unheated	2
237	SK	Silcrete_Reflection_00237	E3.1.6B.21	6B	South Africa	5	Ventral	E3	Training	Training	No	Unheated	Heated	Heated	0
238	SK	Silcrete_Reflection_00238	E3.1.6B.21	6B	South Africa	6	Ventral	E3	Training	Training	No	Unheated	Unheated	Unheated	2
240	SK	Silcrete_Reflection_00240	E3.1.6B.21	6B	South Africa	8	Ventral	E3	Training	Training	No	Unheated	Heated	Heated	0
241	JM	Silcrete_Reflection_00241	E3.1.5N.7	5N	South Africa	1	Dorsal	E3	Training	Training	No	Unheated	Unheated	Unheated	2
242	JM	Silcrete_Reflection_00242	E3.1.5N.7	5N	South Africa	2	Dorsal	E3	Training	Training	No	Unheated	Heated	Heated	0
243	JM	Silcrete_Reflection_00243	E3.1.5N.7	5N	South Africa	3	Dorsal	E3	Training	Training	No	Unheated	Unheated	Heated	1
244	JM	Silcrete_Reflection_00244	E3.1.5N.7	5N	South Africa	4	Dorsal	E3	Training	Training	No	Unheated	Heated	Heated	0
245	JM	Silcrete_Reflection_00245	E3.1.5N.7	5N	South Africa	5	Ventral	E3	Training	Training	No	Unheated	Heated	Unheated	1
246	JM	Silcrete_Reflection_00246	E3.1.5N.7	5N	South Africa	6	Ventral	E3	Training	Training	No	Unheated	Unheated	Unheated	2
247	JM	Silcrete_Reflection_00247	E3.1.5N.7	5N	South Africa	7	Ventral	E3	Training	Training	No	Unheated	Heated	Unheated	1
248	JM	Silcrete_Reflection_00248	E3.1.5N.7	5N	South Africa	8	Ventral	E3	Training	Training	No	Unheated	Unheated	Unheated	2
249	ET	Silcrete_Reflection_00249	E3.1.5N.23	5N	South Africa	1	Dorsal	E3	Training	Test	Yes	Unheated	Unheated	Unheated	2
250	ET	Silcrete_Reflection_00250	E3.1.5N.23	5N	South Africa	2	Dorsal	E3	Training	Test	Yes	Unheated	Heated	Heated	0
251	ET	Silcrete_Reflection_00251	E3.1.5N.23	5N	South Africa	3	Dorsal	E3	Training	Test	Yes	Unheated	Unheated	Unheated	2
252	ET	Silcrete_Reflection_00252	E3.1.5N.23	5N	South Africa	4	Dorsal	E3	Training	Test	Yes	Unheated	Unheated	Unheated	2
253	ET	Silcrete_Reflection_00253	E3.1.5N.23	5N	South Africa	5	Ventral	E3	Training	Test	Yes	Unheated	Unheated	Unheated	2
254	ET	Silcrete_Reflection_00254	E3.1.5N.23	5N	South Africa	6	Ventral	E3	Training	Test	Yes	Unheated	Unheated	Unheated	2
255	ET	Silcrete_Reflection_00255	E3.1.5N.23	5N	South Africa	7	Ventral	E3	Training	Test	Yes	Unheated	Unheated	Unheated	2
256	ET	Silcrete_Reflection_00256	E3.1.5N.23	5N	South Africa	8	Ventral	E3	Training	Test	Yes	Unheated	Unheated	Unheated	2
258	ET	Silcrete_Reflection_00258	E3.1.1B.2	1B	South Africa	2	Dorsal	E3	Training	Training	No	Heated	Heated	Heated	2
260	ET	Silcrete_Reflection_00260	E3.1.1B.2	1B	South Africa	4	Dorsal	E3	Training	Training	No	Heated	Heated	Heated	2
263	ET	Silcrete_Reflection_00263	E3.1.1B.2	1B	South Africa	7	Ventral	E3	Training	Training	No	Heated	Heated	Heated	2
264	ET	Silcrete_Reflection_00264	E3.1.1B.2	1B	South Africa	8	Ventral	E3	Training	Training	No	Heated	Heated	Heated	2
265	ET	Silcrete_Reflection_00265	E3.1.1B.10	1B	South Africa	1	Dorsal	E3	Training	Training	No	Heated	Heated	Heated	2
266	ET	Silcrete_Reflection_00266	E3.1.1B.10	1B	South Africa	2	Dorsal	E3	Training	Training	No	Heated	Heated	Heated	2
267	ET	Silcrete_Reflection_00267	E3.1.1B.10	1B	South Africa	3	Dorsal	E3	Training	Training	No	Heated	Heated	Heated	2
268	ET	Silcrete_Reflection_00268	E3.1.1B.10	1B	South Africa	4	Dorsal	E3	Training	Training	No	Heated	Heated	Heated	2
269	ET	Silcrete_Reflection_00269	E3.1.1B.10	1B	South Africa	5	Ventral	E3	Training	Training	No	Heated	Heated	Heated	2
270	ET	Silcrete_Reflection_00270	E3.1.1B.10	1B	South Africa	6	Ventral	E3	Training	Training	No	Heated	Heated	Heated	2
271	ET	Silcrete_Reflection_00271	E3.1.1B.10	1B	South Africa	7	Ventral	E3	Training	Training	No	Heated	Heated	Heated	2
272	ET	Silcrete_Reflection_00272	E3.1.1B.10	1B	South Africa	8	Ventral	E3	Training	Training	No	Heated	Heated	Heated	2
273	ET	Silcrete_Reflection_00273	E3.1.5N.43	5N	South Africa	1	Dorsal	E3	Training	Validation	Yes	Unheated	Unheated	Unheated	2
274	ET	Silcrete_Reflection_00274	E3.1.5N.43	5N	South Africa	2	Dorsal	E3	Training	Validation	Yes	Unheated	Unheated	Unheated	2
275	ET	Silcrete_Reflection_00275	E3.1.5N.43	5N	South Africa	3	Dorsal	E3	Training	Validation	Yes	Unheated	Unheated	Unheated	2
276	ET	Silcrete_Reflection_00276	E3.1.5N.43	5N	South Africa	4	Dorsal	E3	Training	Validation	Yes	Unheated	Unheated	Unheated	2
277	ET	Silcrete_Reflection_00277	E3.1.5N.43	5N	South Africa	5	Ventral	E3	Training	Validation	Yes	Unheated	Unheated	Unheated	2
278	ET	Silcrete_Reflection_00278	E3.1.5N.43	5N	South Africa	6	Ventral	E3	Training	Validation	Yes	Unheated	Heated	Unheated	1
279	ET	Silcrete_Reflection_00279	E3.1.5N.43	5N	South Africa	7	Ventral	E3	Training	Validation	Yes	Unheated	Unheated	Unheated	2
280	ET	Silcrete_Reflection_00280	E3.1.5N.43	5N	South Africa	8	Ventral	E3	Training	Validation	Yes	Unheated	Unheated	Unheated	2
281	SK	Silcrete_Reflection_00281	D9.1.12C.11	12C	South Africa	1	Dorsal	D9	Training	Training	No	Unheated	Unheated	Unheated	2
282	SK	Silcrete_Reflection_00282	D9.1.12C.11	12C	South Africa	2	Dorsal	D9	Training	Training	No	Unheated	Unheated	Unheated	2
283	SK	Silcrete_Reflection_00283	D9.1.12C.11	12C	South Africa	3	Dorsal	D9	Training	Training	No	Unheated	Unheated	Unheated	2
284	SK	Silcrete_Reflection_00284	D9.1.12C.11	12C	South Africa	4	Dorsal	D9	Training	Training	No	Unheated	Unheated	Unheated	2
285	SK	Silcrete_Reflection_00285	D9.1.12C.11	12C	South Africa	5	Ventral	D9	Training	Training	No	Unheated	Unheated	Unheated	2
286	SK	Silcrete_Reflection_00286	D9.1.12C.11	12C	South Africa	6	Ventral	D9	Training	Training	No	Unheated	Unheated	Unheated	2
287	SK	Silcrete_Reflection_00287	D9.1.12C.11	12C	South Africa	7	Ventral	D9	Training	Training	No	Unheated	Heated	Unheated	1
288	SK	Silcrete_Reflection_00288	D9.1.12C.11	12C	South Africa	8	Ventral	D9	Training	Training	No	Unheated	Unheated	Unheated	2
289	SK	Silcrete_Reflection_00289	D9.1.12C.30	12C	South Africa	1	Dorsal	D9	Training	Training	No	Unheated	Unheated	Unheated	2
290	SK	Silcrete_Reflection_00290	D9.1.12C.30	12C	South Africa	2	Dorsal	D9	Training	Training	No	Unheated	Unheated	Unheated	2
291	SK	Silcrete_Reflection_00291	D9.1.12C.30	12C	South Africa	3	Dorsal	D9	Training	Training	No	Unheated	Unheated	Unheated	2
292	SK	Silcrete_Reflection_00292	D9.1.12C.30	12C	South Africa	4	Dorsal	D9	Training	Training	No	Unheated	Unheated	Unheated	2
293	SK	Silcrete_Reflection_00293	D9.1.12C.30	12C	South Africa	5	Ventral	D9	Training	Training	No	Unheated	Unheated	Unheated	2
294	SK	Silcrete_Reflection_00294	D9.1.12C.30	12C	South Africa	6	Ventral	D9	Training	Training	No	Unheated	Unheated	Unheated	2
295	SK	Silcrete_Reflection_00295	D9.1.12C.30	12C	South Africa	7	Ventral	D9	Training	Training	No	Unheated	Unheated	Unheated	2
296	SK	Silcrete_Reflection_00296	D9.1.12C.30	12C	South Africa	8	Ventral	D9	Training	Training	No	Unheated	Unheated	Unheated	2
297	SK	Silcrete_Reflection_00297	D9.1.10B.6A	10B	South Africa	1	Dorsal	D9	Training	Training	No	Heated	Heated	Heated	2
298	SK	Silcrete_Reflection_00298	D9.1.10B.6A	10B	South Africa	2	Dorsal	D9	Training	Training	No	Heated	Heated	Heated	2
299	SK	Silcrete_Reflection_00299	D9.1.10B.6A	10B	South Africa	3	Dorsal	D9	Training	Training	No	Heated	Heated	Heated	2
300	SK	Silcrete_Reflection_00300	D9.1.10B.6A	10B	South Africa	4	Dorsal	D9	Training	Training	No	Heated	Heated	Heated	2
301	SK	Silcrete_Reflection_00301	D9.1.10B.6A	10B	South Africa	5	Ventral	D9	Training	Training	No	Heated	Heated	Heated	2
302	SK	Silcrete_Reflection_00302	D9.1.10B.6A	10B	South Africa	6	Ventral	D9	Training	Training	No	Heated	Heated	Heated	2
303	SK	Silcrete_Reflection_00303	D9.1.10B.6A	10B	South Africa	7	Ventral	D9	Training	Training	No	Heated	Heated	Heated	2
304	SK	Silcrete_Reflection_00304	D9.1.10B.6A	10B	South Africa	8	Ventral	D9	Training	Training	No	Heated	Heated	Heated	2
305	SK	Silcrete_Reflection_00305	D9.1.10B.6B	10B	South Africa	1	Dorsal	D9	Training	Training	No	Heated	Heated	Heated	2
306	SK	Silcrete_Reflection_00306	D9.1.10B.6B	10B	South Africa	2	Dorsal	D9	Training	Training	No	Heated	Heated	Heated	2
307	SK	Silcrete_Reflection_00307	D9.1.10B.6B	10B	South Africa	3	Dorsal	D9	Training	Training	No	Heated	Heated	Heated	2
308	SK	Silcrete_Reflection_00308	D9.1.10B.6B	10B	South Africa	4	Dorsal	D9	Training	Training	No	Heated	Heated	Heated	2
309	ET	Silcrete_Reflection_00309	D9.1.10B.6B	10B	South Africa	5	Ventral	D9	Training	Training	No	Heated	Heated	Heated	2
310	ET	Silcrete_Reflection_00310	D9.1.10B.6B	10B	South Africa	6	Ventral	D9	Training	Training	No	Heated	Heated	Heated	2
311	ET	Silcrete_Reflection_00311	D9.1.10B.6B	10B	South Africa	7	Ventral	D9	Training	Training	No	Heated	Heated	Heated	2
312	ET	Silcrete_Reflection_00312	D9.1.10B.6B	10B	South Africa	8	Ventral	D9	Training	Training	No	Heated	Heated	Heated	2
313	ET	Silcrete_Reflection_00313	D9.1.10B.6B	10B	South Africa	1	Dorsal	D9	Training	Training	No	Heated	Heated	Unheated	1
314	ET	Silcrete_Reflection_00314	D9.1.10B.6B	10B	South Africa	2	Dorsal	D9	Training	Training	No	Heated	Heated	Heated	2
315	ET	Silcrete_Reflection_00315	D9.1.10B.6B	10B	South Africa	3	Dorsal	D9	Training	Training	No	Heated	Heated	Heated	2
316	ET	Silcrete_Reflection_00316	D9.1.10B.6B	10B	South Africa	4	Dorsal	D9	Training	Training	No	Heated	Heated	Heated	2
317	ET	Silcrete_Reflection_00317	D9.1.10B.6A	10B	South Africa	1	Ventral	D9	Training	Training	No	Heated	Heated	Heated	2
318	ET	Silcrete_Reflection_00318	D9.1.10B.6A	10B	South Africa	2	Ventral	D9	Training	Training	No	Heated	Heated	Heated	2
319	ET	Silcrete_Reflection_00319	D9.1.10B.6A	10B	South Africa	3	Ventral	D9	Training	Training	No	Heated	Heated	Heated	2
320	ET	Silcrete_Reflection_00320	D9.1.10B.6A	10B	South Africa	4	Ventral	D9	Training	Training	No	Heated	Heated	Heated	2
321	ET	Silcrete_Reflection_00321	D9.1.10B.6A	10B	South Africa	5	Dorsal	D9	Training	Training	No	Heated	Heated	Heated	2
322	ET	Silcrete_Reflection_00322	D9.1.10B.6A	10B	South Africa	6	Dorsal	D9	Training	Training	No	Heated	Heated	Heated	2
323	ET	Silcrete_Reflection_00323	D9.1.10B.6A	10B	South Africa	7	Dorsal	D9	Training	Training	No	Heated	Heated	Heated	2
324	ET	Silcrete_Reflection_00324	D9.1.10B.6A	10B	South Africa	8	Dorsal	D9	Training	Training	No	Heated	Heated	Heated	2
345	ET	Silcrete_Reflection_00345	E3.1.5O.11	5O	South Africa	1	Dorsal	E3	Training	Training	No	Unheated	Unheated	Unheated	2
346	ET	Silcrete_Reflection_00346	E3.1.5O.11	5O	South Africa	2	Dorsal	E3	Training	Training	No	Unheated	Unheated	Unheated	2
347	ET	Silcrete_Reflection_00347	E3.1.5O.11	5O	South Africa	3	Dorsal	E3	Training	Training	No	Unheated	Unheated	Unheated	2
348	ET	Silcrete_Reflection_00348	E3.1.5O.11	5O	South Africa	4	Dorsal	E3	Training	Training	No	Unheated	Unheated	Unheated	2
349	ET	Silcrete_Reflection_00349	E3.1.5O.11	5O	South Africa	5	Ventral	E3	Training	Training	No	Unheated	Unheated	Unheated	2
350	ET	Silcrete_Reflection_00350	E3.1.5O.11	5O	South Africa	6	Ventral	E3	Training	Training	No	Unheated	Unheated	Unheated	2
351	ET	Silcrete_Reflection_00351	E3.1.5O.11	5O	South Africa	7	Ventral	E3	Training	Training	No	Unheated	Unheated	Unheated	2
352	ET	Silcrete_Reflection_00352	E3.1.5O.11	5O	South Africa	8	Ventral	E3	Training	Training	No	Unheated	Unheated	Unheated	2
353	ET	Silcrete_Reflection_00353	E3.1.5O.6	5O	South Africa	1	Dorsal	E3	Training	Training	No	Unheated	Unheated	Unheated	2
354	ET	Silcrete_Reflection_00354	E3.1.5O.6	5O	South Africa	2	Dorsal	E3	Training	Training	No	Unheated	Unheated	Unheated	2
355	ET	Silcrete_Reflection_00355	E3.1.5O.6	5O	South Africa	3	Dorsal	E3	Training	Training	No	Unheated	Unheated	Unheated	2
356	ET	Silcrete_Reflection_00356	E3.1.5O.6	5O	South Africa	4	Dorsal	E3	Training	Training	No	Unheated	Unheated	Unheated	2
357	ET	Silcrete_Reflection_00357	E3.1.5O.6	5O	South Africa	5	Ventral	E3	Training	Training	No	Unheated	Unheated	Unheated	2
358	ET	Silcrete_Reflection_00358	E3.1.5O.6	5O	South Africa	6	Ventral	E3	Training	Training	No	Unheated	Unheated	Unheated	2
359	ET	Silcrete_Reflection_00359	E3.1.5O.6	5O	South Africa	7	Ventral	E3	Training	Training	No	Unheated	Unheated	Unheated	2
360	ET	Silcrete_Reflection_00360	E3.1.5O.6	5O	South Africa	8	Ventral	E3	Training	Training	No	Unheated	Unheated	Unheated	2
361	SK	Silcrete_Reflection_00361	D9.1.10B.6B	10B	South Africa	5	Ventral	D9	Training	Training	No	Heated	Heated	Heated	2
362	SK	Silcrete_Reflection_00362	D9.1.10B.6B	10B	South Africa	6	Ventral	D9	Training	Training	No	Heated	Heated	Heated	2
363	SK	Silcrete_Reflection_00363	D9.1.10B.6B	10B	South Africa	7	Ventral	D9	Training	Training	No	Heated	Heated	Heated	2
364	SK	Silcrete_Reflection_00364	D9.1.10B.6B	10B	South Africa	8	Ventral	D9	Training	Training	No	Heated	Heated	Heated	2
375	SK	Silcrete_Reflection_00375	D9.1.10B.18	10B	South Africa	1	Dorsal	D9	Training	Training	No	Heated	Heated	Heated	2
376	SK	Silcrete_Reflection_00376	D9.1.10B.18	10B	South Africa	2	Dorsal	D9	Training	Training	No	Heated	Heated	Heated	2
377	SK	Silcrete_Reflection_00377	D9.1.10B.18	10B	South Africa	3	Dorsal	D9	Training	Training	No	Heated	Heated	Heated	2
378	SK	Silcrete_Reflection_00378	D9.1.10B.18	10B	South Africa	4	Dorsal	D9	Training	Training	No	Heated	Heated	Heated	2
379	SK	Silcrete_Reflection_00379	D9.1.10B.18	10B	South Africa	5	Ventral	D9	Training	Training	No	Heated	Heated	Heated	2
380	SK	Silcrete_Reflection_00380	D9.1.10B.18	10B	South Africa	6	Ventral	D9	Training	Training	No	Heated	Heated	Heated	2
381	SK	Silcrete_Reflection_00381	D9.1.10B.18	10B	South Africa	7	Ventral	D9	Training	Training	No	Heated	Heated	Heated	2
383	SK	Silcrete_Reflection_00383	E3.1.5P.23	5P	South Africa	1	Dorsal	E3	Training	Validation	Yes	Heated	Heated	Heated	2
384	SK	Silcrete_Reflection_00384	E3.1.5P.23	5P	South Africa	2	Dorsal	E3	Training	Validation	Yes	Heated	Heated	Heated	2
385	SK	Silcrete_Reflection_00385	E3.1.5P.23	5P	South Africa	3	Dorsal	E3	Training	Validation	Yes	Heated	Heated	Heated	2
386	SK	Silcrete_Reflection_00386	E3.1.5P.23	5P	South Africa	4	Dorsal	E3	Training	Validation	Yes	Heated	Heated	Heated	2
387	SK	Silcrete_Reflection_00387	E3.1.5P.23	5P	South Africa	5	Ventral	E3	Training	Validation	Yes	Heated	Heated	Heated	2
388	SK	Silcrete_Reflection_00388	E3.1.5P.23	5P	South Africa	6	Ventral	E3	Training	Validation	Yes	Heated	Heated	Unheated	1
389	SK	Silcrete_Reflection_00389	E3.1.5P.23	5P	South Africa	7	Ventral	E3	Training	Validation	Yes	Heated	Heated	Heated	2
390	SK	Silcrete_Reflection_00390	E3.1.5P.23	5P	South Africa	8	Ventral	E3	Training	Validation	Yes	Heated	Heated	Heated	2
391	SK	Silcrete_Reflection_00391	E3.1.5N.25	5N	South Africa	1	Dorsal	E3	Training	Training	No	Unheated	Unheated	Heated	1
392	SK	Silcrete_Reflection_00392	E3.1.5N.25	5N	South Africa	2	Dorsal	E3	Training	Training	No	Unheated	Unheated	Unheated	2
393	SK	Silcrete_Reflection_00393	E3.1.5N.25	5N	South Africa	3	Dorsal	E3	Training	Training	No	Unheated	Heated	Heated	0
394	SK	Silcrete_Reflection_00394	E3.1.5N.25	5N	South Africa	4	Dorsal	E3	Training	Training	No	Unheated	Unheated	Unheated	2
395	SK	Silcrete_Reflection_00395	E3.1.5N.25	5N	South Africa	5	Ventral	E3	Training	Training	No	Unheated	Unheated	Unheated	2
396	SK	Silcrete_Reflection_00396	E3.1.5N.25	5N	South Africa	6	Ventral	E3	Training	Training	No	Unheated	Unheated	Unheated	2
397	SK	Silcrete_Reflection_00397	E3.1.5N.25	5N	South Africa	7	Ventral	E3	Training	Training	No	Unheated	Unheated	Unheated	2
398	SK	Silcrete_Reflection_00398	E3.1.5N.25	5N	South Africa	8	Ventral	E3	Training	Training	No	Unheated	Unheated	Unheated	2
399	SK	Silcrete_Reflection_00399	E3.1.6C.27	6C	South Africa	1	Dorsal	E3	Training	Training	No	Heated	Unheated	Heated	1
400	SK	Silcrete_Reflection_00400	E3.1.6C.27	6C	South Africa	2	Dorsal	E3	Training	Training	No	Heated	Heated	Heated	2
401	SK	Silcrete_Reflection_00401	E3.1.6C.27	6C	South Africa	3	Dorsal	E3	Training	Training	No	Heated	Unheated	Unheated	0
402	SK	Silcrete_Reflection_00402	E3.1.6C.27	6C	South Africa	4	Dorsal	E3	Training	Training	No	Heated	Heated	Heated	2
403	SK	Silcrete_Reflection_00403	E3.1.6C.27	6C	South Africa	5	Ventral	E3	Training	Training	No	Heated	Heated	Heated	2
404	SK	Silcrete_Reflection_00404	E3.1.6C.27	6C	South Africa	6	Ventral	E3	Training	Training	No	Heated	Heated	Heated	2
405	SK	Silcrete_Reflection_00405	E3.1.6C.27	6C	South Africa	7	Ventral	E3	Training	Training	No	Heated	Heated	Heated	2
406	SK	Silcrete_Reflection_00406	E3.1.6C.27	6C	South Africa	8	Ventral	E3	Training	Training	No	Heated	Unheated	Unheated	0
407	SK	Silcrete_Reflection_00407	E3.1.5P.14	5P	South Africa	1	Dorsal	E3	Training	Validation	Yes	Heated	Heated	Heated	2
408	SK	Silcrete_Reflection_00408	E3.1.5P.14	5P	South Africa	2	Dorsal	E3	Training	Validation	Yes	Heated	Heated	Heated	2
409	SK	Silcrete_Reflection_00409	E3.1.5P.14	5P	South Africa	3	Dorsal	E3	Training	Validation	Yes	Heated	Heated	Heated	2
410	SK	Silcrete_Reflection_00410	E3.1.5P.14	5P	South Africa	4	Dorsal	E3	Training	Validation	Yes	Heated	Heated	Heated	2
411	SK	Silcrete_Reflection_00411	E3.1.5P.14	5P	South Africa	5	Ventral	E3	Training	Validation	Yes	Heated	Heated	Heated	2
412	SK	Silcrete_Reflection_00412	E3.1.5P.14	5P	South Africa	6	Ventral	E3	Training	Validation	Yes	Heated	Heated	Heated	2
413	SK	Silcrete_Reflection_00413	E3.1.5P.14	5P	South Africa	7	Ventral	E3	Training	Validation	Yes	Heated	Heated	Heated	2
414	SK	Silcrete_Reflection_00414	E3.1.5P.14	5P	South Africa	8	Ventral	E3	Training	Validation	Yes	Heated	Heated	Heated	2
423	SK	Silcrete_Reflection_00423	E3.1.6B.10	6B	South Africa	1	Dorsal	E3	Training	Training	No	Unheated	Unheated	Unheated	2
424	SK	Silcrete_Reflection_00424	E3.1.6B.10	6B	South Africa	2	Dorsal	E3	Training	Training	No	Unheated	Unheated	Unheated	2
426	SK	Silcrete_Reflection_00426	E3.1.6B.10	6B	South Africa	4	Dorsal	E3	Training	Training	No	Unheated	Unheated	Unheated	2
427	SK	Silcrete_Reflection_00427	E3.1.6B.10	6B	South Africa	5	Ventral	E3	Training	Training	No	Unheated	Unheated	Unheated	2
429	SK	Silcrete_Reflection_00429	E3.1.6B.10	6B	South Africa	7	Ventral	E3	Training	Training	No	Unheated	Unheated	Unheated	2
430	SK	Silcrete_Reflection_00430	E3.1.6B.10	6B	South Africa	8	Ventral	E3	Training	Training	No	Unheated	Unheated	Unheated	2
432	SK	Silcrete_Reflection_00432	E3.1.1B.24	1B	South Africa	2	Dorsal	E3	Training	Test	Yes	Heated	Heated	Heated	2
433	SK	Silcrete_Reflection_00433	E3.1.1B.24	1B	South Africa	3	Dorsal	E3	Training	Test	Yes	Heated	Heated	Heated	2
434	SK	Silcrete_Reflection_00434	E3.1.1B.24	1B	South Africa	4	Dorsal	E3	Training	Test	Yes	Heated	Heated	Heated	2
435	SK	Silcrete_Reflection_00435	E3.1.1B.24	1B	South Africa	5	Ventral	E3	Training	Test	Yes	Heated	Heated	Heated	2
436	SK	Silcrete_Reflection_00436	E3.1.1B.24	1B	South Africa	6	Ventral	E3	Training	Test	Yes	Heated	Heated	Heated	2
437	SK	Silcrete_Reflection_00437	E3.1.1B.24	1B	South Africa	7	Ventral	E3	Training	Test	Yes	Heated	Heated	Heated	2
438	SK	Silcrete_Reflection_00438	E3.1.1B.24	1B	South Africa	8	Ventral	E3	Training	Test	Yes	Heated	Heated	Heated	2
447	ET	Silcrete_Reflection_00447	E3.1.6B.2	6B	South Africa	1	Dorsal	E3	Training	Training	No	Unheated	Unheated	Unheated	2
448	ET	Silcrete_Reflection_00448	E3.1.6B.2	6B	South Africa	2	Dorsal	E3	Training	Training	No	Unheated	Heated	Heated	0
449	ET	Silcrete_Reflection_00449	E3.1.6B.2	6B	South Africa	3	Dorsal	E3	Training	Training	No	Unheated	Unheated	Unheated	2
450	ET	Silcrete_Reflection_00450	E3.1.6B.2	6B	South Africa	4	Dorsal	E3	Training	Training	No	Unheated	Unheated	Unheated	2
451	ET	Silcrete_Reflection_00451	E3.1.6B.2	6B	South Africa	5	Ventral	E3	Training	Training	No	Unheated	Unheated	Unheated	2
452	ET	Silcrete_Reflection_00452	E3.1.6B.2	6B	South Africa	6	Ventral	E3	Training	Training	No	Unheated	Unheated	Unheated	2
453	ET	Silcrete_Reflection_00453	E3.1.6B.2	6B	South Africa	7	Ventral	E3	Training	Training	No	Unheated	Unheated	Unheated	2
454	ET	Silcrete_Reflection_00454	E3.1.6B.2	6B	South Africa	8	Ventral	E3	Training	Training	No	Unheated	Unheated	Heated	1
456	ET	Silcrete_Reflection_00456	E3.1.6B.23	6B	South Africa	2	Dorsal	E3	Training	Training	No	Unheated	Heated	Heated	0
458	ET	Silcrete_Reflection_00458	E3.1.6B.23	6B	South Africa	4	Dorsal	E3	Training	Training	No	Unheated	Unheated	Unheated	2
459	ET	Silcrete_Reflection_00459	E3.1.6B.23	6B	South Africa	5	Ventral	E3	Training	Training	No	Unheated	Unheated	Unheated	2
460	ET	Silcrete_Reflection_00460	E3.1.6B.23	6B	South Africa	6	Ventral	E3	Training	Training	No	Unheated	Heated	Heated	0
461	ET	Silcrete_Reflection_00461	E3.1.6B.23	6B	South Africa	7	Ventral	E3	Training	Training	No	Unheated	Unheated	Unheated	2
462	ET	Silcrete_Reflection_00462	E3.1.6B.23	6B	South Africa	8	Ventral	E3	Training	Training	No	Unheated	Heated	Heated	0
463	ET	Silcrete_Reflection_00463	E3.1.5P.47	5P	South Africa	1	Dorsal	E3	Training	Training	No	Heated	Heated	Heated	2
464	ET	Silcrete_Reflection_00464	E3.1.5P.47	5P	South Africa	2	Dorsal	E3	Training	Training	No	Heated	Heated	Heated	2
465	ET	Silcrete_Reflection_00465	E3.1.5P.47	5P	South Africa	3	Dorsal	E3	Training	Training	No	Heated	Heated	Heated	2
466	ET	Silcrete_Reflection_00466	E3.1.5P.47	5P	South Africa	4	Dorsal	E3	Training	Training	No	Heated	Heated	Heated	2
467	ET	Silcrete_Reflection_00467	E3.1.5P.47	5P	South Africa	5	Ventral	E3	Training	Training	No	Heated	Heated	Heated	2
468	ET	Silcrete_Reflection_00468	E3.1.5P.47	5P	South Africa	6	Ventral	E3	Training	Training	No	Heated	Heated	Heated	2
469	ET	Silcrete_Reflection_00469	E3.1.5P.47	5P	South Africa	7	Ventral	E3	Training	Training	No	Heated	Heated	Heated	2
470	ET	Silcrete_Reflection_00470	E3.1.5P.47	5P	South Africa	8	Ventral	E3	Training	Training	No	Heated	Heated	Heated	2
471	ET	Silcrete_Reflection_00471	E3.1.5N.19	5N	South Africa	1	Dorsal	E3	Training	Test	Yes	Unheated	Unheated	Unheated	2
472	ET	Silcrete_Reflection_00472	E3.1.5N.19	5N	South Africa	2	Dorsal	E3	Training	Test	Yes	Unheated	Unheated	Unheated	2
473	ET	Silcrete_Reflection_00473	E3.1.5N.19	5N	South Africa	3	Dorsal	E3	Training	Test	Yes	Unheated	Unheated	Unheated	2
474	ET	Silcrete_Reflection_00474	E3.1.5N.19	5N	South Africa	4	Dorsal	E3	Training	Test	Yes	Unheated	Unheated	Unheated	2
475	ET	Silcrete_Reflection_00475	E3.1.5N.19	5N	South Africa	5	Ventral	E3	Training	Test	Yes	Unheated	Unheated	Unheated	2
476	ET	Silcrete_Reflection_00476	E3.1.5N.19	5N	South Africa	6	Ventral	E3	Training	Test	Yes	Unheated	Unheated	Unheated	2
477	ET	Silcrete_Reflection_00477	E3.1.5N.19	5N	South Africa	7	Ventral	E3	Training	Test	Yes	Unheated	Unheated	Unheated	2
478	ET	Silcrete_Reflection_00478	E3.1.5N.19	5N	South Africa	8	Ventral	E3	Training	Test	Yes	Unheated	Unheated	Unheated	2
479	JM	Silcrete_Reflection_00479	D9.1.12C.6	12C	South Africa	1	Dorsal	D9	Training	Training	No	Unheated	Unheated	Unheated	2
480	JM	Silcrete_Reflection_00480	D9.1.12C.6	12C	South Africa	2	Dorsal	D9	Training	Training	No	Unheated	Unheated	Unheated	2
481	JM	Silcrete_Reflection_00481	D9.1.12C.6	12C	South Africa	3	Dorsal	D9	Training	Training	No	Unheated	Heated	Unheated	1
482	JM	Silcrete_Reflection_00482	D9.1.12C.6	12C	South Africa	4	Dorsal	D9	Training	Training	No	Unheated	Unheated	Unheated	2
483	JM	Silcrete_Reflection_00483	D9.1.12C.6	12C	South Africa	5	Ventral	D9	Training	Training	No	Unheated	Unheated	Unheated	2
484	JM	Silcrete_Reflection_00484	D9.1.12C.6	12C	South Africa	6	Ventral	D9	Training	Training	No	Unheated	Unheated	Unheated	2
485	JM	Silcrete_Reflection_00485	D9.1.12C.6	12C	South Africa	7	Ventral	D9	Training	Training	No	Unheated	Unheated	Unheated	2
486	JM	Silcrete_Reflection_00486	D9.1.12C.6	12C	South Africa	8	Ventral	D9	Training	Training	No	Unheated	Unheated	Unheated	2
607	JM	Silcrete_Reflection_00607	D9.1.12A.11	12A	South Africa	1	Dorsal	D9	Training	Validation	Yes	Unheated	Unheated	Unheated	2
608	JM	Silcrete_Reflection_00608	D9.1.12A.11	12A	South Africa	2	Dorsal	D9	Training	Validation	Yes	Unheated	Unheated	Unheated	2
609	JM	Silcrete_Reflection_00609	D9.1.12A.11	12A	South Africa	3	Dorsal	D9	Training	Validation	Yes	Unheated	Heated	Heated	0
610	JM	Silcrete_Reflection_00610	D9.1.12A.11	12A	South Africa	4	Dorsal	D9	Training	Validation	Yes	Unheated	Unheated	Unheated	2
611	JM	Silcrete_Reflection_00611	D9.1.12A.11	12A	South Africa	5	Ventral	D9	Training	Validation	Yes	Unheated	Heated	Heated	0
612	JM	Silcrete_Reflection_00612	D9.1.12A.11	12A	South Africa	6	Ventral	D9	Training	Validation	Yes	Unheated	Unheated	Unheated	2
613	JM	Silcrete_Reflection_00613	D9.1.12A.11	12A	South Africa	7	Ventral	D9	Training	Validation	Yes	Unheated	Unheated	Unheated	2
614	JM	Silcrete_Reflection_00614	D9.1.12A.11	12A	South Africa	8	Ventral	D9	Training	Validation	Yes	Unheated	Unheated	Unheated	2
615	JM	Silcrete_Reflection_00615	D9.1.12A.40	12A	South Africa	1	Dorsal	D9	Training	Training	No	Unheated	Unheated	Unheated	2
616	JM	Silcrete_Reflection_00616	D9.1.12A.40	12A	South Africa	2	Dorsal	D9	Training	Training	No	Unheated	Unheated	Unheated	2
617	JM	Silcrete_Reflection_00617	D9.1.12A.40	12A	South Africa	3	Dorsal	D9	Training	Training	No	Unheated	Unheated	Unheated	2
618	JM	Silcrete_Reflection_00618	D9.1.12A.40	12A	South Africa	4	Dorsal	D9	Training	Training	No	Unheated	Unheated	Heated	1
619	JM	Silcrete_Reflection_00619	D9.1.12A.40	12A	South Africa	5	Ventral	D9	Training	Training	No	Unheated	Unheated	Unheated	2
620	JM	Silcrete_Reflection_00620	D9.1.12A.40	12A	South Africa	6	Ventral	D9	Training	Training	No	Unheated	Unheated	Unheated	2
621	JM	Silcrete_Reflection_00621	D9.1.12A.40	12A	South Africa	7	Ventral	D9	Training	Training	No	Unheated	Unheated	Unheated	2
622	JM	Silcrete_Reflection_00622	D9.1.12A.40	12A	South Africa	8	Ventral	D9	Training	Training	No	Unheated	Heated	Heated	0
623	JM	Silcrete_Reflection_00623	D9.1.12A.30	12A	South Africa	1	Dorsal	D9	Training	Test	Yes	Unheated	Unheated	Unheated	2
624	JM	Silcrete_Reflection_00624	D9.1.12A.30	12A	South Africa	2	Dorsal	D9	Training	Test	Yes	Unheated	Heated	Heated	0
625	JM	Silcrete_Reflection_00625	D9.1.12A.30	12A	South Africa	3	Dorsal	D9	Training	Test	Yes	Unheated	Heated	Heated	0
626	JM	Silcrete_Reflection_00626	D9.1.12A.30	12A	South Africa	4	Dorsal	D9	Training	Test	Yes	Unheated	Unheated	Unheated	2
627	JM	Silcrete_Reflection_00627	D9.1.12A.30	12A	South Africa	5	Ventral	D9	Training	Test	Yes	Unheated	Unheated	Unheated	2
628	JM	Silcrete_Reflection_00628	D9.1.12A.30	12A	South Africa	6	Ventral	D9	Training	Test	Yes	Unheated	Unheated	Unheated	2
629	JM	Silcrete_Reflection_00629	D9.1.12A.30	12A	South Africa	7	Ventral	D9	Training	Test	Yes	Unheated	Unheated	Unheated	2
630	JM	Silcrete_Reflection_00630	D9.1.12A.30	12A	South Africa	8	Ventral	D9	Training	Test	Yes	Unheated	Unheated	Unheated	2
631	JM	Silcrete_Reflection_00631	D9.1.12A.34	12A	South Africa	1	Dorsal	D9	Training	Test	Yes	Unheated	Unheated	Unheated	2
632	JM	Silcrete_Reflection_00632	D9.1.12A.34	12A	South Africa	2	Dorsal	D9	Training	Test	Yes	Unheated	Unheated	Unheated	2
633	JM	Silcrete_Reflection_00633	D9.1.12A.34	12A	South Africa	3	Dorsal	D9	Training	Test	Yes	Unheated	Unheated	Unheated	2
634	JM	Silcrete_Reflection_00634	D9.1.12A.34	12A	South Africa	4	Dorsal	D9	Training	Test	Yes	Unheated	Unheated	Unheated	2
635	JM	Silcrete_Reflection_00635	D9.1.12A.34	12A	South Africa	5	Ventral	D9	Training	Test	Yes	Unheated	Unheated	Unheated	2
637	JM	Silcrete_Reflection_00637	D9.1.12A.34	12A	South Africa	7	Ventral	D9	Training	Test	Yes	Unheated	Unheated	Unheated	2
638	JM	Silcrete_Reflection_00638	D9.1.12A.34	12A	South Africa	8	Ventral	D9	Training	Test	Yes	Unheated	Unheated	Unheated	2
647	JM	Silcrete_Reflection_00647	D9.1.12B.22	12B	South Africa	1	Dorsal	D9	Training	Training	No	Heated	Heated	Heated	2
648	JM	Silcrete_Reflection_00648	D9.1.12B.22	12B	South Africa	2	Dorsal	D9	Training	Training	No	Heated	Heated	Heated	2
649	JM	Silcrete_Reflection_00649	D9.1.12B.22	12B	South Africa	3	Dorsal	D9	Training	Training	No	Heated	Heated	Heated	2
650	JM	Silcrete_Reflection_00650	D9.1.12B.22	12B	South Africa	4	Dorsal	D9	Training	Training	No	Heated	Heated	Heated	2
651	JM	Silcrete_Reflection_00651	D9.1.12B.22	12B	South Africa	5	Ventral	D9	Training	Training	No	Heated	Heated	Heated	2
652	JM	Silcrete_Reflection_00652	D9.1.12B.22	12B	South Africa	6	Ventral	D9	Training	Training	No	Heated	Heated	Heated	2
653	JM	Silcrete_Reflection_00653	D9.1.12B.22	12B	South Africa	7	Ventral	D9	Training	Training	No	Heated	Heated	Heated	2
654	JM	Silcrete_Reflection_00654	D9.1.12B.22	12B	South Africa	8	Ventral	D9	Training	Training	No	Heated	Heated	Heated	2
655	JM	Silcrete_Reflection_00655	D9.1.12B.37	12B	South Africa	1	Dorsal	D9	Training	Training	No	Heated	Heated	Heated	2
656	JM	Silcrete_Reflection_00656	D9.1.12B.37	12B	South Africa	2	Dorsal	D9	Training	Training	No	Heated	Heated	Heated	2
657	JM	Silcrete_Reflection_00657	D9.1.12B.37	12B	South Africa	3	Dorsal	D9	Training	Training	No	Heated	Heated	Heated	2
658	JM	Silcrete_Reflection_00658	D9.1.12B.37	12B	South Africa	4	Dorsal	D9	Training	Training	No	Heated	Heated	Heated	2
659	JM	Silcrete_Reflection_00659	D9.1.12B.37	12B	South Africa	5	Ventral	D9	Training	Training	No	Heated	Heated	Unheated	1
660	JM	Silcrete_Reflection_00660	D9.1.12B.37	12B	South Africa	6	Ventral	D9	Training	Training	No	Heated	Heated	Heated	2
661	JM	Silcrete_Reflection_00661	D9.1.12B.37	12B	South Africa	7	Ventral	D9	Training	Training	No	Heated	Heated	Heated	2
662	JM	Silcrete_Reflection_00662	D9.1.12B.37	12B	South Africa	8	Ventral	D9	Training	Training	No	Heated	Heated	Heated	2
664	JM	Silcrete_Reflection_00664	D9.1.12B.18	12B	South Africa	2	Dorsal	D9	Training	Training	No	Heated	Heated	Heated	2
665	JM	Silcrete_Reflection_00665	D9.1.12B.18	12B	South Africa	3	Dorsal	D9	Training	Training	No	Heated	Heated	Unheated	1
666	JM	Silcrete_Reflection_00666	D9.1.12B.18	12B	South Africa	4	Dorsal	D9	Training	Training	No	Heated	Heated	Heated	2
667	JM	Silcrete_Reflection_00667	D9.1.12B.18	12B	South Africa	5	Ventral	D9	Training	Training	No	Heated	Heated	Heated	2
668	JM	Silcrete_Reflection_00668	D9.1.12B.18	12B	South Africa	6	Ventral	D9	Training	Training	No	Heated	Heated	Heated	2
669	JM	Silcrete_Reflection_00669	D9.1.12B.18	12B	South Africa	7	Ventral	D9	Training	Training	No	Heated	Heated	Heated	2
670	JM	Silcrete_Reflection_00670	D9.1.12B.18	12B	South Africa	8	Ventral	D9	Training	Training	No	Heated	Heated	Heated	2
671	JM	Silcrete_Reflection_00671	D9.1.12B.29	12B	South Africa	1	Dorsal	D9	Training	Training	No	Heated	Heated	Heated	2
672	JM	Silcrete_Reflection_00672	D9.1.12B.29	12B	South Africa	2	Dorsal	D9	Training	Training	No	Heated	Heated	Heated	2
673	JM	Silcrete_Reflection_00673	D9.1.12B.29	12B	South Africa	3	Dorsal	D9	Training	Training	No	Heated	Heated	Heated	2
674	JM	Silcrete_Reflection_00674	D9.1.12B.29	12B	South Africa	4	Dorsal	D9	Training	Training	No	Heated	Heated	Heated	2
675	JM	Silcrete_Reflection_00675	D9.1.12B.29	12B	South Africa	5	Ventral	D9	Training	Training	No	Heated	Heated	Heated	2
676	JM	Silcrete_Reflection_00676	D9.1.12B.29	12B	South Africa	6	Ventral	D9	Training	Training	No	Heated	Unheated	Heated	1
677	JM	Silcrete_Reflection_00677	D9.1.12B.29	12B	South Africa	7	Ventral	D9	Training	Training	No	Heated	Heated	Heated	2
678	JM	Silcrete_Reflection_00678	D9.1.12B.29	12B	South Africa	8	Ventral	D9	Training	Training	No	Heated	Heated	Heated	2
679	JM	Silcrete_Reflection_00679	D9.1.12B.27a	12B	South Africa	1	Dorsal	D9	Training	Training	No	Heated	Unheated	Unheated	0
680	JM	Silcrete_Reflection_00680	D9.1.12B.27a	12B	South Africa	2	Dorsal	D9	Training	Training	No	Heated	Heated	Unheated	1
681	JM	Silcrete_Reflection_00681	D9.1.12B.27a	12B	South Africa	3	Dorsal	D9	Training	Training	No	Heated	Unheated	Unheated	0
682	JM	Silcrete_Reflection_00682	D9.1.12B.27a	12B	South Africa	4	Dorsal	D9	Training	Training	No	Heated	Heated	Heated	2
683	JM	Silcrete_Reflection_00683	D9.1.12B.27a	12B	South Africa	5	Ventral	D9	Training	Training	No	Heated	Heated	Heated	2
684	JM	Silcrete_Reflection_00684	D9.1.12B.27a	12B	South Africa	6	Ventral	D9	Training	Training	No	Heated	Heated	Heated	2
685	JM	Silcrete_Reflection_00685	D9.1.12B.27a	12B	South Africa	7	Ventral	D9	Training	Training	No	Heated	Heated	Heated	2
686	JM	Silcrete_Reflection_00686	D9.1.12B.27a	12B	South Africa	8	Ventral	D9	Training	Training	No	Heated	Heated	Heated	2
695	JM	Silcrete_Reflection_00695	E3.1.6A.34	6A	South Africa	1	Dorsal	E3	Training	Training	No	Heated	Heated	Heated	2
696	JM	Silcrete_Reflection_00696	E3.1.6A.34	6A	South Africa	2	Dorsal	E3	Training	Training	No	Heated	Heated	Heated	2
697	JM	Silcrete_Reflection_00697	E3.1.6A.34	6A	South Africa	3	Dorsal	E3	Training	Training	No	Heated	Heated	Heated	2
698	JM	Silcrete_Reflection_00698	E3.1.6A.34	6A	South Africa	4	Dorsal	E3	Training	Training	No	Heated	Heated	Heated	2
699	JM	Silcrete_Reflection_00699	E3.1.6A.34	6A	South Africa	5	Ventral	E3	Training	Training	No	Heated	Heated	Heated	2
700	JM	Silcrete_Reflection_00700	E3.1.6A.34	6A	South Africa	6	Ventral	E3	Training	Training	No	Heated	Heated	Heated	2
701	JM	Silcrete_Reflection_00701	E3.1.6A.34	6A	South Africa	7	Ventral	E3	Training	Training	No	Heated	Heated	Heated	2
702	JM	Silcrete_Reflection_00702	E3.1.6A.34	6A	South Africa	8	Ventral	E3	Training	Training	No	Heated	Heated	Heated	2
703	JM	Silcrete_Reflection_00703	E3.1.6A.36	6A	South Africa	1	Dorsal	E3	Training	Training	No	Heated	Heated	Heated	2
704	JM	Silcrete_Reflection_00704	E3.1.6A.36	6A	South Africa	2	Dorsal	E3	Training	Training	No	Heated	Unheated	Unheated	0
705	JM	Silcrete_Reflection_00705	E3.1.6A.36	6A	South Africa	3	Dorsal	E3	Training	Training	No	Heated	Heated	Heated	2
706	JM	Silcrete_Reflection_00706	E3.1.6A.36	6A	South Africa	4	Dorsal	E3	Training	Training	No	Heated	Heated	Heated	2
707	JM	Silcrete_Reflection_00707	E3.1.6A.36	6A	South Africa	5	Ventral	E3	Training	Training	No	Heated	Heated	Heated	2
708	JM	Silcrete_Reflection_00708	E3.1.6A.36	6A	South Africa	6	Ventral	E3	Training	Training	No	Heated	Heated	Heated	2
709	JM	Silcrete_Reflection_00709	E3.1.6A.36	6A	South Africa	7	Ventral	E3	Training	Training	No	Heated	Heated	Heated	2
710	JM	Silcrete_Reflection_00710	E3.1.6A.36	6A	South Africa	8	Ventral	E3	Training	Training	No	Heated	Heated	Heated	2
711	JM	Silcrete_Reflection_00711	E3.1.6A.60	6A	South Africa	1	Dorsal	E3	Training	Training	No	Heated	Heated	Heated	2
712	JM	Silcrete_Reflection_00712	E3.1.6A.60	6A	South Africa	2	Dorsal	E3	Training	Training	No	Heated	Heated	Heated	2
713	JM	Silcrete_Reflection_00713	E3.1.6A.60	6A	South Africa	3	Dorsal	E3	Training	Training	No	Heated	Heated	Heated	2
714	JM	Silcrete_Reflection_00714	E3.1.6A.60	6A	South Africa	4	Dorsal	E3	Training	Training	No	Heated	Heated	Heated	2
715	JM	Silcrete_Reflection_00715	E3.1.6A.60	6A	South Africa	5	Ventral	E3	Training	Training	No	Heated	Heated	Heated	2
716	JM	Silcrete_Reflection_00716	E3.1.6A.60	6A	South Africa	6	Ventral	E3	Training	Training	No	Heated	Heated	Heated	2
717	JM	Silcrete_Reflection_00717	E3.1.6A.60	6A	South Africa	7	Ventral	E3	Training	Training	No	Heated	Heated	Heated	2
718	JM	Silcrete_Reflection_00718	E3.1.6A.60	6A	South Africa	8	Ventral	E3	Training	Training	No	Heated	Heated	Heated	2
727	JM	Silcrete_Reflection_00727	E3.1.1A.08	1A	South Africa	1	Dorsal	E3	Training	Training	No	Unheated	Unheated	Unheated	2
729	JM	Silcrete_Reflection_00729	E3.1.1A.08	1A	South Africa	3	Dorsal	E3	Training	Training	No	Unheated	Unheated	Unheated	2
730	JM	Silcrete_Reflection_00730	E3.1.1A.08	1A	South Africa	4	Dorsal	E3	Training	Training	No	Unheated	Unheated	Heated	1
731	JM	Silcrete_Reflection_00731	E3.1.1A.08	1A	South Africa	5	Ventral	E3	Training	Training	No	Unheated	Heated	Unheated	1
732	JM	Silcrete_Reflection_00732	E3.1.1A.08	1A	South Africa	6	Ventral	E3	Training	Training	No	Unheated	Heated	Heated	0
733	JM	Silcrete_Reflection_00733	E3.1.1A.08	1A	South Africa	7	Ventral	E3	Training	Training	No	Unheated	Unheated	Unheated	2
734	JM	Silcrete_Reflection_00734	E3.1.1A.08	1A	South Africa	8	Ventral	E3	Training	Training	No	Unheated	Unheated	Unheated	2
735	JM	Silcrete_Reflection_00735	E3.1.1A.46	1A	South Africa	1	Dorsal	E3	Training	Training	No	Unheated	Unheated	Unheated	2
737	JM	Silcrete_Reflection_00737	E3.1.1A.46	1A	South Africa	3	Dorsal	E3	Training	Training	No	Unheated	Unheated	Unheated	2
738	JM	Silcrete_Reflection_00738	E3.1.1A.46	1A	South Africa	4	Dorsal	E3	Training	Training	No	Unheated	Unheated	Unheated	2
739	JM	Silcrete_Reflection_00739	E3.1.1A.46	1A	South Africa	5	Ventral	E3	Training	Training	No	Unheated	Unheated	Unheated	2
740	JM	Silcrete_Reflection_00740	E3.1.1A.46	1A	South Africa	6	Ventral	E3	Training	Training	No	Unheated	Unheated	Unheated	2
742	JM	Silcrete_Reflection_00742	E3.1.1A.46	1A	South Africa	8	Ventral	E3	Training	Training	No	Unheated	Unheated	Unheated	2
743	JM	Silcrete_Reflection_00743	E3.1.1A.50	1A	South Africa	1	Dorsal	E3	Training	Training	No	Unheated	Unheated	Unheated	2
744	JM	Silcrete_Reflection_00744	E3.1.1A.50	1A	South Africa	2	Dorsal	E3	Training	Training	No	Unheated	Unheated	Unheated	2
745	JM	Silcrete_Reflection_00745	E3.1.1A.50	1A	South Africa	3	Dorsal	E3	Training	Training	No	Unheated	Unheated	Unheated	2
746	JM	Silcrete_Reflection_00746	E3.1.1A.50	1A	South Africa	4	Dorsal	E3	Training	Training	No	Unheated	Unheated	Unheated	2
747	JM	Silcrete_Reflection_00747	E3.1.1A.50	1A	South Africa	5	Ventral	E3	Training	Training	No	Unheated	Unheated	Unheated	2
748	JM	Silcrete_Reflection_00748	E3.1.1A.50	1A	South Africa	6	Ventral	E3	Training	Training	No	Unheated	Unheated	Unheated	2
749	JM	Silcrete_Reflection_00749	E3.1.1A.50	1A	South Africa	7	Ventral	E3	Training	Training	No	Unheated	Unheated	Unheated	2
750	JM	Silcrete_Reflection_00750	E3.1.1A.50	1A	South Africa	8	Ventral	E3	Training	Training	No	Unheated	Unheated	Unheated	2
767	JM	Silcrete_Reflection_00767	I14.2.16A.06	16A	South Africa	1	Dorsal	I14	Training	Training	No	Unheated	Heated	Heated	0
768	JM	Silcrete_Reflection_00768	I14.2.16A.06	16A	South Africa	2	Dorsal	I14	Training	Training	No	Unheated	Unheated	Unheated	2
769	JM	Silcrete_Reflection_00769	I14.2.16A.06	16A	South Africa	3	Dorsal	I14	Training	Training	No	Unheated	Unheated	Unheated	2
770	JM	Silcrete_Reflection_00770	I14.2.16A.06	16A	South Africa	4	Dorsal	I14	Training	Training	No	Unheated	Heated	Heated	0
771	JM	Silcrete_Reflection_00771	I14.2.16A.06	16A	South Africa	5	Ventral	I14	Training	Training	No	Unheated	Unheated	Unheated	2
772	JM	Silcrete_Reflection_00772	I14.2.16A.06	16A	South Africa	6	Ventral	I14	Training	Training	No	Unheated	Unheated	Unheated	2
773	JM	Silcrete_Reflection_00773	I14.2.16A.06	16A	South Africa	7	Ventral	I14	Training	Training	No	Unheated	Unheated	Unheated	2
774	JM	Silcrete_Reflection_00774	I14.2.16A.06	16A	South Africa	8	Ventral	I14	Training	Training	No	Unheated	Unheated	Unheated	2
783	JM	Silcrete_Reflection_00783	I14.2.16A.28	16A	South Africa	1	Dorsal	I14	Training	Test	Yes	Unheated	Unheated	Unheated	2
784	JM	Silcrete_Reflection_00784	I14.2.16A.28	16A	South Africa	2	Dorsal	I14	Training	Test	Yes	Unheated	Unheated	Unheated	2
785	JM	Silcrete_Reflection_00785	I14.2.16A.28	16A	South Africa	3	Dorsal	I14	Training	Test	Yes	Unheated	Unheated	Unheated	2
786	JM	Silcrete_Reflection_00786	I14.2.16A.28	16A	South Africa	4	Dorsal	I14	Training	Test	Yes	Unheated	Unheated	Unheated	2
787	JM	Silcrete_Reflection_00787	I14.2.16A.28	16A	South Africa	5	Ventral	I14	Training	Test	Yes	Unheated	Unheated	Unheated	2
788	JM	Silcrete_Reflection_00788	I14.2.16A.28	16A	South Africa	6	Ventral	I14	Training	Test	Yes	Unheated	Unheated	Unheated	2
789	JM	Silcrete_Reflection_00789	I14.2.16A.28	16A	South Africa	7	Ventral	I14	Training	Test	Yes	Unheated	Unheated	Unheated	2
790	JM	Silcrete_Reflection_00790	I14.2.16A.28	16A	South Africa	8	Ventral	I14	Training	Test	Yes	Unheated	Unheated	Unheated	2
799	JM	Silcrete_Reflection_00799	I14.2.16A.23	16A	South Africa	1	Dorsal	I14	Training	Training	No	Unheated	Unheated	Unheated	2
800	JM	Silcrete_Reflection_00800	I14.2.16A.23	16A	South Africa	2	Dorsal	I14	Training	Training	No	Unheated	Unheated	Unheated	2
801	JM	Silcrete_Reflection_00801	I14.2.16A.23	16A	South Africa	3	Dorsal	I14	Training	Training	No	Unheated	Heated	Unheated	1
802	JM	Silcrete_Reflection_00802	I14.2.16A.23	16A	South Africa	4	Dorsal	I14	Training	Training	No	Unheated	Unheated	Unheated	2
803	JM	Silcrete_Reflection_00803	I14.2.16A.23	16A	South Africa	5	Ventral	I14	Training	Training	No	Unheated	Unheated	Unheated	2
804	JM	Silcrete_Reflection_00804	I14.2.16A.23	16A	South Africa	6	Ventral	I14	Training	Training	No	Unheated	Unheated	Unheated	2
805	JM	Silcrete_Reflection_00805	I14.2.16A.23	16A	South Africa	7	Ventral	I14	Training	Training	No	Unheated	Unheated	Unheated	2
806	JM	Silcrete_Reflection_00806	I14.2.16A.23	16A	South Africa	8	Ventral	I14	Training	Training	No	Unheated	Unheated	Unheated	2
807	JM	Silcrete_Reflection_00807	I14.2.16A.37	16A	South Africa	1	Dorsal	I14	Training	Training	No	Unheated	Unheated	Unheated	2
808	JM	Silcrete_Reflection_00808	I14.2.16A.37	16A	South Africa	2	Dorsal	I14	Training	Training	No	Unheated	Unheated	Unheated	2
809	JM	Silcrete_Reflection_00809	I14.2.16A.37	16A	South Africa	3	Dorsal	I14	Training	Training	No	Unheated	Unheated	Unheated	2
810	JM	Silcrete_Reflection_00810	I14.2.16A.37	16A	South Africa	4	Dorsal	I14	Training	Training	No	Unheated	Unheated	Unheated	2
811	JM	Silcrete_Reflection_00811	I14.2.16A.37	16A	South Africa	5	Ventral	I14	Training	Training	No	Unheated	Unheated	Unheated	2
812	JM	Silcrete_Reflection_00812	I14.2.16A.37	16A	South Africa	6	Ventral	I14	Training	Training	No	Unheated	Unheated	Heated	1
813	JM	Silcrete_Reflection_00813	I14.2.16A.37	16A	South Africa	7	Ventral	I14	Training	Training	No	Unheated	Heated	Heated	0
814	JM	Silcrete_Reflection_00814	I14.2.16A.37	16A	South Africa	8	Ventral	I14	Training	Training	No	Unheated	Unheated	Unheated	2
815	JM	Silcrete_Reflection_00815	I14.2.16A.35	16A	South Africa	1	Dorsal	I14	Training	Training	No	Unheated	Unheated	Unheated	2
816	JM	Silcrete_Reflection_00816	I14.2.16A.35	16A	South Africa	2	Dorsal	I14	Training	Training	No	Unheated	Unheated	Heated	1
817	JM	Silcrete_Reflection_00817	I14.2.16A.35	16A	South Africa	3	Dorsal	I14	Training	Training	No	Unheated	Heated	Unheated	1
818	JM	Silcrete_Reflection_00818	I14.2.16A.35	16A	South Africa	4	Dorsal	I14	Training	Training	No	Unheated	Unheated	Unheated	2
819	JM	Silcrete_Reflection_00819	I14.2.16A.35	16A	South Africa	5	Ventral	I14	Training	Training	No	Unheated	Unheated	Unheated	2
820	JM	Silcrete_Reflection_00820	I14.2.16A.35	16A	South Africa	6	Ventral	I14	Training	Training	No	Unheated	Unheated	Unheated	2
821	JM	Silcrete_Reflection_00821	I14.2.16A.35	16A	South Africa	7	Ventral	I14	Training	Training	No	Unheated	Unheated	Unheated	2
822	JM	Silcrete_Reflection_00822	I14.2.16A.35	16A	South Africa	8	Ventral	I14	Training	Training	No	Unheated	Unheated	Unheated	2
823	JM	Silcrete_Reflection_00823	I14.2.16A.07	16A	South Africa	1	Dorsal	I14	Training	Training	No	Unheated	Unheated	Unheated	2
824	JM	Silcrete_Reflection_00824	I14.2.16A.07	16A	South Africa	2	Dorsal	I14	Training	Training	No	Unheated	Unheated	Unheated	2
825	JM	Silcrete_Reflection_00825	I14.2.16A.07	16A	South Africa	3	Dorsal	I14	Training	Training	No	Unheated	Unheated	Unheated	2
826	JM	Silcrete_Reflection_00826	I14.2.16A.07	16A	South Africa	4	Dorsal	I14	Training	Training	No	Unheated	Unheated	Unheated	2
827	JM	Silcrete_Reflection_00827	I14.2.16A.07	16A	South Africa	5	Ventral	I14	Training	Training	No	Unheated	Unheated	Unheated	2
828	JM	Silcrete_Reflection_00828	I14.2.16A.07	16A	South Africa	6	Ventral	I14	Training	Training	No	Unheated	Unheated	Unheated	2
829	JM	Silcrete_Reflection_00829	I14.2.16A.07	16A	South Africa	7	Ventral	I14	Training	Training	No	Unheated	Unheated	Unheated	2
830	JM	Silcrete_Reflection_00830	I14.2.16A.07	16A	South Africa	8	Ventral	I14	Training	Training	No	Unheated	Unheated	Unheated	2
831	JM	Silcrete_Reflection_00831	I14.2.16A.04	16A	South Africa	1	Dorsal	I14	Training	Test	Yes	Unheated	Unheated	Unheated	2
832	JM	Silcrete_Reflection_00832	I14.2.16A.04	16A	South Africa	2	Dorsal	I14	Training	Test	Yes	Unheated	Unheated	Unheated	2
833	JM	Silcrete_Reflection_00833	I14.2.16A.04	16A	South Africa	3	Dorsal	I14	Training	Test	Yes	Unheated	Unheated	Unheated	2
834	JM	Silcrete_Reflection_00834	I14.2.16A.04	16A	South Africa	4	Dorsal	I14	Training	Test	Yes	Unheated	Unheated	Unheated	2
835	JM	Silcrete_Reflection_00835	I14.2.16A.04	16A	South Africa	5	Ventral	I14	Training	Test	Yes	Unheated	Unheated	Unheated	2
836	JM	Silcrete_Reflection_00836	I14.2.16A.04	16A	South Africa	6	Ventral	I14	Training	Test	Yes	Unheated	Unheated	Unheated	2
837	JM	Silcrete_Reflection_00837	I14.2.16A.04	16A	South Africa	7	Ventral	I14	Training	Test	Yes	Unheated	Unheated	Unheated	2
838	JM	Silcrete_Reflection_00838	I14.2.16A.04	16A	South Africa	8	Ventral	I14	Training	Test	Yes	Unheated	Unheated	Unheated	2
855	JM	Silcrete_Reflection_00855	I14.2.16B.15	16B	South Africa	1	Dorsal	I14	Training	Test	Yes	Heated	Unheated	Unheated	0
856	JM	Silcrete_Reflection_00856	I14.2.16B.15	16B	South Africa	2	Dorsal	I14	Training	Test	Yes	Heated	Heated	Heated	2
857	JM	Silcrete_Reflection_00857	I14.2.16B.15	16B	South Africa	3	Dorsal	I14	Training	Test	Yes	Heated	Heated	Heated	2
858	JM	Silcrete_Reflection_00858	I14.2.16B.15	16B	South Africa	4	Dorsal	I14	Training	Test	Yes	Heated	Heated	Heated	2
859	JM	Silcrete_Reflection_00859	I14.2.16B.15	16B	South Africa	5	Ventral	I14	Training	Test	Yes	Heated	Heated	Heated	2
860	JM	Silcrete_Reflection_00860	I14.2.16B.15	16B	South Africa	6	Ventral	I14	Training	Test	Yes	Heated	Unheated	Heated	1
861	JM	Silcrete_Reflection_00861	I14.2.16B.15	16B	South Africa	7	Ventral	I14	Training	Test	Yes	Heated	Unheated	Unheated	0
862	JM	Silcrete_Reflection_00862	I14.2.16B.15	16B	South Africa	8	Ventral	I14	Training	Test	Yes	Heated	Unheated	Unheated	0
863	JM	Silcrete_Reflection_00863	I14.2.16B.42	16B	South Africa	1	Dorsal	I14	Training	Training	No	Heated	Heated	Heated	2
864	JM	Silcrete_Reflection_00864	I14.2.16B.42	16B	South Africa	2	Dorsal	I14	Training	Training	No	Heated	Heated	Heated	2
865	JM	Silcrete_Reflection_00865	I14.2.16B.42	16B	South Africa	3	Dorsal	I14	Training	Training	No	Heated	Heated	Heated	2
866	JM	Silcrete_Reflection_00866	I14.2.16B.42	16B	South Africa	4	Dorsal	I14	Training	Training	No	Heated	Heated	Heated	2
867	JM	Silcrete_Reflection_00867	I14.2.16B.42	16B	South Africa	5	Ventral	I14	Training	Training	No	Heated	Heated	Heated	2
868	JM	Silcrete_Reflection_00868	I14.2.16B.42	16B	South Africa	6	Ventral	I14	Training	Training	No	Heated	Heated	Heated	2
869	JM	Silcrete_Reflection_00869	I14.2.16B.42	16B	South Africa	7	Ventral	I14	Training	Training	No	Heated	Heated	Heated	2
870	JM	Silcrete_Reflection_00870	I14.2.16B.42	16B	South Africa	8	Ventral	I14	Training	Training	No	Heated	Heated	Heated	2
879	JM	Silcrete_Reflection_00879	I14.2.16B.49	16B	South Africa	1	Dorsal	I14	Training	Validation	Yes	Heated	Unheated	Unheated	0
880	JM	Silcrete_Reflection_00880	I14.2.16B.49	16B	South Africa	2	Dorsal	I14	Training	Validation	Yes	Heated	Heated	Heated	2
881	JM	Silcrete_Reflection_00881	I14.2.16B.49	16B	South Africa	3	Dorsal	I14	Training	Validation	Yes	Heated	Heated	Heated	2
882	JM	Silcrete_Reflection_00882	I14.2.16B.49	16B	South Africa	4	Dorsal	I14	Training	Validation	Yes	Heated	Heated	Heated	2
883	JM	Silcrete_Reflection_00883	I14.2.16B.49	16B	South Africa	5	Ventral	I14	Training	Validation	Yes	Heated	Unheated	Unheated	0
884	JM	Silcrete_Reflection_00884	I14.2.16B.49	16B	South Africa	6	Ventral	I14	Training	Validation	Yes	Heated	Heated	Heated	2
885	JM	Silcrete_Reflection_00885	I14.2.16B.49	16B	South Africa	7	Ventral	I14	Training	Validation	Yes	Heated	Heated	Heated	2
886	JM	Silcrete_Reflection_00886	I14.2.16B.49	16B	South Africa	8	Ventral	I14	Training	Validation	Yes	Heated	Heated	Heated	2
887	JM	Silcrete_Reflection_00887	I14.2.16B.61	16B	South Africa	1	Dorsal	I14	Training	Training	No	Heated	Unheated	Unheated	0
888	JM	Silcrete_Reflection_00888	I14.2.16B.61	16B	South Africa	2	Dorsal	I14	Training	Training	No	Heated	Heated	Heated	2
889	JM	Silcrete_Reflection_00889	I14.2.16B.61	16B	South Africa	3	Dorsal	I14	Training	Training	No	Heated	Heated	Heated	2
890	JM	Silcrete_Reflection_00890	I14.2.16B.61	16B	South Africa	4	Dorsal	I14	Training	Training	No	Heated	Unheated	Unheated	0
891	JM	Silcrete_Reflection_00891	I14.2.16B.61	16B	South Africa	5	Ventral	I14	Training	Training	No	Heated	Heated	Heated	2
892	JM	Silcrete_Reflection_00892	I14.2.16B.61	16B	South Africa	6	Ventral	I14	Training	Training	No	Heated	Heated	Heated	2
893	JM	Silcrete_Reflection_00893	I14.2.16B.61	16B	South Africa	7	Ventral	I14	Training	Training	No	Heated	Heated	Heated	2
894	JM	Silcrete_Reflection_00894	I14.2.16B.61	16B	South Africa	8	Ventral	I14	Training	Training	No	Heated	Unheated	Unheated	0
895	JM	Silcrete_Reflection_00895	I14.2.16B.55a	16B	South Africa	1	Dorsal	I14	Training	Training	No	Heated	Heated	Heated	2
896	JM	Silcrete_Reflection_00896	I14.2.16B.55a	16B	South Africa	2	Dorsal	I14	Training	Training	No	Heated	Heated	Heated	2
897	JM	Silcrete_Reflection_00897	I14.2.16B.55a	16B	South Africa	3	Dorsal	I14	Training	Training	No	Heated	Unheated	Unheated	0
898	JM	Silcrete_Reflection_00898	I14.2.16B.55a	16B	South Africa	4	Dorsal	I14	Training	Training	No	Heated	Heated	Heated	2
899	JM	Silcrete_Reflection_00899	I14.2.16B.55a	16B	South Africa	5	Ventral	I14	Training	Training	No	Heated	Heated	Heated	2
900	JM	Silcrete_Reflection_00900	I14.2.16B.55a	16B	South Africa	6	Ventral	I14	Training	Training	No	Heated	Heated	Heated	2
901	JM	Silcrete_Reflection_00901	I14.2.16B.55a	16B	South Africa	7	Ventral	I14	Training	Training	No	Heated	Heated	Heated	2
902	JM	Silcrete_Reflection_00902	I14.2.16B.55a	16B	South Africa	8	Ventral	I14	Training	Training	No	Heated	Heated	Heated	2
903	JM	Silcrete_Reflection_00903	I14.2.16B.41	16B	South Africa	1	Dorsal	I14	Training	Training	No	Heated	Heated	Heated	2
904	JM	Silcrete_Reflection_00904	I14.2.16B.41	16B	South Africa	2	Dorsal	I14	Training	Training	No	Heated	Heated	Heated	2
905	JM	Silcrete_Reflection_00905	I14.2.16B.41	16B	South Africa	3	Dorsal	I14	Training	Training	No	Heated	Unheated	Unheated	0
906	JM	Silcrete_Reflection_00906	I14.2.16B.41	16B	South Africa	4	Dorsal	I14	Training	Training	No	Heated	Heated	Heated	2
907	JM	Silcrete_Reflection_00907	I14.2.16B.41	16B	South Africa	5	Ventral	I14	Training	Training	No	Heated	Heated	Heated	2
908	JM	Silcrete_Reflection_00908	I14.2.16B.41	16B	South Africa	6	Ventral	I14	Training	Training	No	Heated	Heated	Heated	2
909	JM	Silcrete_Reflection_00909	I14.2.16B.41	16B	South Africa	7	Ventral	I14	Training	Training	No	Heated	Heated	Heated	2
910	JM	Silcrete_Reflection_00910	I14.2.16B.41	16B	South Africa	8	Ventral	I14	Training	Training	No	Heated	Heated	Heated	2
911	JM	Silcrete_Reflection_00911	I14.2.16B.29	16B	South Africa	1	Dorsal	I14	Training	Training	No	Heated	Heated	Heated	2
912	JM	Silcrete_Reflection_00912	I14.2.16B.29	16B	South Africa	2	Dorsal	I14	Training	Training	No	Heated	Heated	Heated	2
913	JM	Silcrete_Reflection_00913	I14.2.16B.29	16B	South Africa	3	Dorsal	I14	Training	Training	No	Heated	Heated	Heated	2
914	JM	Silcrete_Reflection_00914	I14.2.16B.29	16B	South Africa	4	Dorsal	I14	Training	Training	No	Heated	Heated	Heated	2
915	JM	Silcrete_Reflection_00915	I14.2.16B.29	16B	South Africa	5	Ventral	I14	Training	Training	No	Heated	Heated	Heated	2
916	JM	Silcrete_Reflection_00916	I14.2.16B.29	16B	South Africa	6	Ventral	I14	Training	Training	No	Heated	Heated	Heated	2
917	JM	Silcrete_Reflection_00917	I14.2.16B.29	16B	South Africa	7	Ventral	I14	Training	Training	No	Heated	Unheated	Unheated	0
918	JM	Silcrete_Reflection_00918	I14.2.16B.29	16B	South Africa	8	Ventral	I14	Training	Training	No	Heated	Heated	Heated	2
919	JM	Silcrete_Reflection_00919	I14.2.16B.59	16B	South Africa	1	Dorsal	I14	Training	Training	No	Heated	Heated	Heated	2
920	JM	Silcrete_Reflection_00920	I14.2.16B.59	16B	South Africa	2	Dorsal	I14	Training	Training	No	Heated	Heated	Heated	2
921	JM	Silcrete_Reflection_00921	I14.2.16B.59	16B	South Africa	3	Dorsal	I14	Training	Training	No	Heated	Heated	Heated	2
922	JM	Silcrete_Reflection_00922	I14.2.16B.59	16B	South Africa	4	Dorsal	I14	Training	Training	No	Heated	Heated	Heated	2
923	JM	Silcrete_Reflection_00923	I14.2.16B.59	16B	South Africa	5	Ventral	I14	Training	Training	No	Heated	Heated	Heated	2
924	JM	Silcrete_Reflection_00924	I14.2.16B.59	16B	South Africa	6	Ventral	I14	Training	Training	No	Heated	Heated	Heated	2
925	JM	Silcrete_Reflection_00925	I14.2.16B.59	16B	South Africa	7	Ventral	I14	Training	Training	No	Heated	Heated	Heated	2
926	JM	Silcrete_Reflection_00926	I14.2.16B.59	16B	South Africa	8	Ventral	I14	Training	Training	No	Heated	Heated	Heated	2
33	SK	Silcrete_Reflection_00033	D9.1.12C.36	12C	South Africa	1	Dorsal	D9	Validation	Training	Yes	Unheated	Unheated	Unheated	2
34	SK	Silcrete_Reflection_00034	D9.1.12C.36	12C	South Africa	2	Dorsal	D9	Validation	Training	Yes	Unheated	Unheated	Unheated	2
35	SK	Silcrete_Reflection_00035	D9.1.12C.36	12C	South Africa	3	Dorsal	D9	Validation	Training	Yes	Unheated	Unheated	Unheated	2
36	SK	Silcrete_Reflection_00036	D9.1.12C.36	12C	South Africa	4	Dorsal	D9	Validation	Training	Yes	Unheated	Unheated	Unheated	2
37	SK	Silcrete_Reflection_00037	D9.1.12C.36	12C	South Africa	5	Ventral	D9	Validation	Training	Yes	Unheated	Unheated	Unheated	2
38	SK	Silcrete_Reflection_00038	D9.1.12C.36	12C	South Africa	6	Ventral	D9	Validation	Training	Yes	Unheated	Unheated	Unheated	2
39	SK	Silcrete_Reflection_00039	D9.1.12C.36	12C	South Africa	7	Ventral	D9	Validation	Training	Yes	Unheated	Unheated	Unheated	2
40	SK	Silcrete_Reflection_00040	D9.1.12C.36	12C	South Africa	8	Ventral	D9	Validation	Training	Yes	Unheated	Unheated	Unheated	2
97	SK	Silcrete_Reflection_00097	D9.1.12C.40	12c	South Africa	1	Dorsal	D9	Validation	Training	Yes	Unheated	Unheated	Unheated	2
98	SK	Silcrete_Reflection_00098	D9.1.12C.40	12c	South Africa	2	Dorsal	D9	Validation	Training	Yes	Unheated	Unheated	Unheated	2
99	SK	Silcrete_Reflection_00099	D9.1.12C.40	12c	South Africa	3	Dorsal	D9	Validation	Training	Yes	Unheated	Unheated	Unheated	2
100	SK	Silcrete_Reflection_00100	D9.1.12C.40	12c	South Africa	4	Dorsal	D9	Validation	Training	Yes	Unheated	Unheated	Unheated	2
101	SK	Silcrete_Reflection_00101	D9.1.12C.40	12c	South Africa	5	Ventral	D9	Validation	Training	Yes	Unheated	Heated	Heated	0
102	SK	Silcrete_Reflection_00102	D9.1.12C.40	12c	South Africa	6	Ventral	D9	Validation	Training	Yes	Unheated	Unheated	Unheated	2
103	SK	Silcrete_Reflection_00103	D9.1.12C.40	12c	South Africa	7	Ventral	D9	Validation	Training	Yes	Unheated	Unheated	Unheated	2
104	SK	Silcrete_Reflection_00104	D9.1.12C.40	12c	South Africa	8	Ventral	D9	Validation	Training	Yes	Unheated	Unheated	Unheated	2
137	SK	Silcrete_Reflection_00137	I14.2.16B.5	16B	South Africa	1	Dorsal	I14	Validation	Training	Yes	Heated	Heated	Heated	2
138	SK	Silcrete_Reflection_00138	I14.2.16B.5	16B	South Africa	2	Dorsal	I14	Validation	Training	Yes	Heated	Heated	Heated	2
139	SK	Silcrete_Reflection_00139	I14.2.16B.5	16B	South Africa	3	Dorsal	I14	Validation	Training	Yes	Heated	Heated	Heated	2
140	SK	Silcrete_Reflection_00140	I14.2.16B.5	16B	South Africa	4	Dorsal	I14	Validation	Training	Yes	Heated	Heated	Heated	2
141	SK	Silcrete_Reflection_00141	I14.2.16B.5	16B	South Africa	5	Ventral	I14	Validation	Training	Yes	Heated	Unheated	Unheated	0
142	SK	Silcrete_Reflection_00142	I14.2.16B.5	16B	South Africa	6	Ventral	I14	Validation	Training	Yes	Heated	Unheated	Unheated	0
143	SK	Silcrete_Reflection_00143	I14.2.16B.5	16B	South Africa	7	Ventral	I14	Validation	Training	Yes	Heated	Heated	Heated	2
144	SK	Silcrete_Reflection_00144	I14.2.16B.5	16B	South Africa	8	Ventral	I14	Validation	Training	Yes	Heated	Unheated	Heated	1
217	SK	Silcrete_Reflection_00217	I14.2.16E.31	16B	South Africa	1	Dorsal	I14	Validation	Training	Yes	Heated	Unheated	Unheated	0
218	SK	Silcrete_Reflection_00218	I14.2.16E.31	16B	South Africa	2	Dorsal	I14	Validation	Training	Yes	Heated	Unheated	Heated	1
219	SK	Silcrete_Reflection_00219	I14.2.16E.31	16B	South Africa	3	Dorsal	I14	Validation	Training	Yes	Heated	Heated	Heated	2
220	SK	Silcrete_Reflection_00220	I14.2.16E.31	16B	South Africa	4	Dorsal	I14	Validation	Training	Yes	Heated	Heated	Heated	2
221	SK	Silcrete_Reflection_00221	I14.2.16E.31	16B	South Africa	5	Ventral	I14	Validation	Training	Yes	Heated	Heated	Heated	2
222	SK	Silcrete_Reflection_00222	I14.2.16E.31	16B	South Africa	6	Ventral	I14	Validation	Training	Yes	Heated	Unheated	Unheated	0
223	SK	Silcrete_Reflection_00223	I14.2.16E.31	16B	South Africa	7	Ventral	I14	Validation	Training	Yes	Heated	Unheated	Heated	1
224	SK	Silcrete_Reflection_00224	I14.2.16E.31	16B	South Africa	8	Ventral	I14	Validation	Training	Yes	Heated	Unheated	Unheated	0
415	SK	Silcrete_Reflection_00415	E3.1.5O.28	5O	South Africa	1	Dorsal	E3	Validation	Training	Yes	Unheated	Unheated	Unheated	2
416	SK	Silcrete_Reflection_00416	E3.1.5O.28	5O	South Africa	2	Dorsal	E3	Validation	Training	Yes	Unheated	Unheated	Unheated	2
417	SK	Silcrete_Reflection_00417	E3.1.5O.28	5O	South Africa	3	Dorsal	E3	Validation	Training	Yes	Unheated	Unheated	Unheated	2
418	SK	Silcrete_Reflection_00418	E3.1.5O.28	5O	South Africa	4	Dorsal	E3	Validation	Training	Yes	Unheated	Unheated	Unheated	2
419	SK	Silcrete_Reflection_00419	E3.1.5O.28	5O	South Africa	5	Ventral	E3	Validation	Training	Yes	Unheated	Unheated	Unheated	2
420	SK	Silcrete_Reflection_00420	E3.1.5O.28	5O	South Africa	6	Ventral	E3	Validation	Training	Yes	Unheated	Unheated	Unheated	2
421	SK	Silcrete_Reflection_00421	E3.1.5O.28	5O	South Africa	7	Ventral	E3	Validation	Training	Yes	Unheated	Unheated	Unheated	2
422	SK	Silcrete_Reflection_00422	E3.1.5O.28	5O	South Africa	8	Ventral	E3	Validation	Training	Yes	Unheated	Unheated	Unheated	2
687	JM	Silcrete_Reflection_00687	E3.1.6A.61	6A	South Africa	1	Dorsal	E3	Validation	Training	Yes	Heated	Heated	Heated	2
688	JM	Silcrete_Reflection_00688	E3.1.6A.61	6A	South Africa	2	Dorsal	E3	Validation	Training	Yes	Heated	Heated	Heated	2
689	JM	Silcrete_Reflection_00689	E3.1.6A.61	6A	South Africa	3	Dorsal	E3	Validation	Training	Yes	Heated	Heated	Heated	2
690	JM	Silcrete_Reflection_00690	E3.1.6A.61	6A	South Africa	4	Dorsal	E3	Validation	Training	Yes	Heated	Heated	Heated	2
691	JM	Silcrete_Reflection_00691	E3.1.6A.61	6A	South Africa	5	Ventral	E3	Validation	Training	Yes	Heated	Heated	Heated	2
692	JM	Silcrete_Reflection_00692	E3.1.6A.61	6A	South Africa	6	Ventral	E3	Validation	Training	Yes	Heated	Heated	Heated	2
693	JM	Silcrete_Reflection_00693	E3.1.6A.61	6A	South Africa	7	Ventral	E3	Validation	Training	Yes	Heated	Heated	Heated	2
694	JM	Silcrete_Reflection_00694	E3.1.6A.61	6A	South Africa	8	Ventral	E3	Validation	Training	Yes	Heated	Heated	Heated	2
719	JM	Silcrete_Reflection_00719	E3.1.6A.38	6A	South Africa	1	Dorsal	E3	Validation	Validation	No	Heated	Heated	Heated	2
720	JM	Silcrete_Reflection_00720	E3.1.6A.38	6A	South Africa	2	Dorsal	E3	Validation	Validation	No	Heated	Heated	Heated	2
721	JM	Silcrete_Reflection_00721	E3.1.6A.38	6A	South Africa	3	Dorsal	E3	Validation	Validation	No	Heated	Heated	Heated	2
722	JM	Silcrete_Reflection_00722	E3.1.6A.38	6A	South Africa	4	Dorsal	E3	Validation	Validation	No	Heated	Heated	Heated	2
723	JM	Silcrete_Reflection_00723	E3.1.6A.38	6A	South Africa	5	Ventral	E3	Validation	Validation	No	Heated	Heated	Heated	2
724	JM	Silcrete_Reflection_00724	E3.1.6A.38	6A	South Africa	6	Ventral	E3	Validation	Validation	No	Heated	Heated	Heated	2
725	JM	Silcrete_Reflection_00725	E3.1.6A.38	6A	South Africa	7	Ventral	E3	Validation	Validation	No	Heated	Heated	Heated	2
726	JM	Silcrete_Reflection_00726	E3.1.6A.38	6A	South Africa	8	Ventral	E3	Validation	Validation	No	Heated	Heated	Heated	2
775	JM	Silcrete_Reflection_00775	I14.2.16A.32	16A	South Africa	1	Dorsal	I14	Validation	Training	Yes	Unheated	Heated	Unheated	1
776	JM	Silcrete_Reflection_00776	I14.2.16A.32	16A	South Africa	2	Dorsal	I14	Validation	Training	Yes	Unheated	Heated	Heated	0
777	JM	Silcrete_Reflection_00777	I14.2.16A.32	16A	South Africa	3	Dorsal	I14	Validation	Training	Yes	Unheated	Unheated	Unheated	2
778	JM	Silcrete_Reflection_00778	I14.2.16A.32	16A	South Africa	4	Dorsal	I14	Validation	Training	Yes	Unheated	Unheated	Unheated	2
779	JM	Silcrete_Reflection_00779	I14.2.16A.32	16A	South Africa	5	Ventral	I14	Validation	Training	Yes	Unheated	Unheated	Unheated	2
780	JM	Silcrete_Reflection_00780	I14.2.16A.32	16A	South Africa	6	Ventral	I14	Validation	Training	Yes	Unheated	Unheated	Unheated	2
781	JM	Silcrete_Reflection_00781	I14.2.16A.32	16A	South Africa	7	Ventral	I14	Validation	Training	Yes	Unheated	Unheated	Unheated	2
782	JM	Silcrete_Reflection_00782	I14.2.16A.32	16A	South Africa	8	Ventral	I14	Validation	Training	Yes	Unheated	Unheated	Unheated	2
791		Silcrete_Reflection_00791	I14.2.16A.13	16A	South Africa	1	Dorsal	I14	Validation	Training	Yes	Unheated	Unheated	Unheated	2
792		Silcrete_Reflection_00792	I14.2.16A.13	16A	South Africa	2	Dorsal	I14	Validation	Training	Yes	Unheated	Unheated	Unheated	2
793		Silcrete_Reflection_00793	I14.2.16A.13	16A	South Africa	3	Dorsal	I14	Validation	Training	Yes	Unheated	Unheated	Unheated	2
794		Silcrete_Reflection_00794	I14.2.16A.13	16A	South Africa	4	Dorsal	I14	Validation	Training	Yes	Unheated	Unheated	Unheated	2
795		Silcrete_Reflection_00795	I14.2.16A.13	16A	South Africa	5	Ventral	I14	Validation	Training	Yes	Unheated	Unheated	Unheated	2
796		Silcrete_Reflection_00796	I14.2.16A.13	16A	South Africa	6	Ventral	I14	Validation	Training	Yes	Unheated	Unheated	Unheated	2
797		Silcrete_Reflection_00797	I14.2.16A.13	16A	South Africa	7	Ventral	I14	Validation	Training	Yes	Unheated	Unheated	Unheated	2
798		Silcrete_Reflection_00798	I14.2.16A.13	16A	South Africa	8	Ventral	I14	Validation	Training	Yes	Unheated	Unheated	Unheated	2
871	JM	Silcrete_Reflection_00871	I14.2.16B.47	16B	South Africa	1	Dorsal	I14	Validation	Validation	No	Heated	Heated	Heated	2
872	JM	Silcrete_Reflection_00872	I14.2.16B.47	16B	South Africa	2	Dorsal	I14	Validation	Validation	No	Heated	Heated	Unheated	1
873	JM	Silcrete_Reflection_00873	I14.2.16B.47	16B	South Africa	3	Dorsal	I14	Validation	Validation	No	Heated	Heated	Unheated	1
874	JM	Silcrete_Reflection_00874	I14.2.16B.47	16B	South Africa	4	Dorsal	I14	Validation	Validation	No	Heated	Heated	Unheated	1
875	JM	Silcrete_Reflection_00875	I14.2.16B.47	16B	South Africa	5	Ventral	I14	Validation	Validation	No	Heated	Heated	Heated	2
876	JM	Silcrete_Reflection_00876	I14.2.16B.47	16B	South Africa	6	Ventral	I14	Validation	Validation	No	Heated	Heated	Heated	2
877	JM	Silcrete_Reflection_00877	I14.2.16B.47	16B	South Africa	7	Ventral	I14	Validation	Validation	No	Heated	Heated	Heated	2
878	JM	Silcrete_Reflection_00878	I14.2.16B.47	16B	South Africa	8	Ventral	I14	Validation	Validation	No	Heated	Heated	Unheated	1

## Sheet: Model C Predictions by Specimen
Specimen Number: Any specimen with inconsistent predictions highlighted	ID	Analyst	Processed Spectrum	Nodule	Region	Scan	Side	Source	Model C Row Role	Treatment	Model C_k=5 Predictions	Correct specimen prediction = 1
D9.1.12B.25	41	SK	Silcrete_Reflection_00041	12B	South Africa	1	Dorsal	D9	Test	Heated	Heated	1		# of specimens in the Test set: 11
D9.1.12B.25	44	SK	Silcrete_Reflection_00044	12B	South Africa	4	Dorsal	D9	Test	Heated	Heated			# of specimens with correct prediction, predicted treatment assigned is based on simple majority of associated observations: 10
D9.1.12B.25	46	SK	Silcrete_Reflection_00046	12B	South Africa	6	Ventral	D9	Test	Heated	Heated			# specimens with incorrect prediction: 0
D9.1.12B.25	47	SK	Silcrete_Reflection_00047	12B	South Africa	7	Ventral	D9	Test	Heated	Heated			# specimens with a tie, unable to assign treatment: 1
D9.1.12B.25	48	SK	Silcrete_Reflection_00048	12B	South Africa	8	Ventral	D9	Test	Heated	Heated			# of specimens with inconsistent predictions from associated observations: 4
E3.1.1B.37	121	SK	Silcrete_Reflection_00121	1B	South Africa	1	Dorsal	E3	Test	Heated	Heated	1
E3.1.1B.37	122	SK	Silcrete_Reflection_00122	1B	South Africa	2	Dorsal	E3	Test	Heated	Heated
E3.1.1B.37	123	SK	Silcrete_Reflection_00123	1B	South Africa	3	Dorsal	E3	Test	Heated	Heated
E3.1.1B.37	124	SK	Silcrete_Reflection_00124	1B	South Africa	4	Dorsal	E3	Test	Heated	Heated
E3.1.1B.37	125	SK	Silcrete_Reflection_00125	1B	South Africa	5	Ventral	E3	Test	Heated	Heated
E3.1.1B.37	126	SK	Silcrete_Reflection_00126	1B	South Africa	6	Ventral	E3	Test	Heated	Heated
E3.1.1B.37	127	SK	Silcrete_Reflection_00127	1B	South Africa	7	Ventral	E3	Test	Heated	Heated
E3.1.1B.37	128	SK	Silcrete_Reflection_00128	1B	South Africa	8	Ventral	E3	Test	Heated	Heated
E3.1.6C.5	439	ET	Silcrete_Reflection_00439	6C	South Africa	1	Dorsal	E3	Test	Heated	Heated	1
E3.1.6C.5	440	ET	Silcrete_Reflection_00440	6C	South Africa	2	Dorsal	E3	Test	Heated	Heated
E3.1.6C.5	441	ET	Silcrete_Reflection_00441	6C	South Africa	3	Dorsal	E3	Test	Heated	Heated
E3.1.6C.5	442	ET	Silcrete_Reflection_00442	6C	South Africa	4	Dorsal	E3	Test	Heated	Unheated
E3.1.6C.5	443	ET	Silcrete_Reflection_00443	6C	South Africa	5	Ventral	E3	Test	Heated	Unheated
E3.1.6C.5	444	ET	Silcrete_Reflection_00444	6C	South Africa	6	Ventral	E3	Test	Heated	Heated
E3.1.6C.5	445	ET	Silcrete_Reflection_00445	6C	South Africa	7	Ventral	E3	Test	Heated	Heated
E3.1.6C.5	446	ET	Silcrete_Reflection_00446	6C	South Africa	8	Ventral	E3	Test	Heated	Heated
I14.2.16B.10	847	JM	Silcrete_Reflection_00847	16B	South Africa	1	Dorsal	I14	Test	Heated	Heated	1
I14.2.16B.10	848	JM	Silcrete_Reflection_00848	16B	South Africa	2	Dorsal	I14	Test	Heated	Heated
I14.2.16B.10	849	JM	Silcrete_Reflection_00849	16B	South Africa	3	Dorsal	I14	Test	Heated	Heated
I14.2.16B.10	850	JM	Silcrete_Reflection_00850	16B	South Africa	4	Dorsal	I14	Test	Heated	Heated
I14.2.16B.10	851	JM	Silcrete_Reflection_00851	16B	South Africa	5	Ventral	I14	Test	Heated	Heated
I14.2.16B.10	852	JM	Silcrete_Reflection_00852	16B	South Africa	6	Ventral	I14	Test	Heated	Heated
I14.2.16B.10	853	JM	Silcrete_Reflection_00853	16B	South Africa	7	Ventral	I14	Test	Heated	Heated
I14.2.16B.10	854	JM	Silcrete_Reflection_00854	16B	South Africa	8	Ventral	I14	Test	Heated	Heated
I14.2.16E.6	225	SK	Silcrete_Reflection_00225	16B	South Africa	1	Dorsal	I14	Test	Heated	Heated	1
I14.2.16E.6	226	SK	Silcrete_Reflection_00226	16B	South Africa	2	Dorsal	I14	Test	Heated	Heated
I14.2.16E.6	227	SK	Silcrete_Reflection_00227	16B	South Africa	3	Dorsal	I14	Test	Heated	Heated
I14.2.16E.6	228	SK	Silcrete_Reflection_00228	16B	South Africa	4	Dorsal	I14	Test	Heated	Heated
I14.2.16E.6	229	SK	Silcrete_Reflection_00229	16B	South Africa	5	Ventral	I14	Test	Heated	Heated
I14.2.16E.6	230	SK	Silcrete_Reflection_00230	16B	South Africa	6	Ventral	I14	Test	Heated	Unheated
I14.2.16E.6	231	SK	Silcrete_Reflection_00231	16B	South Africa	7	Ventral	I14	Test	Heated	Unheated
I14.2.16E.6	232	SK	Silcrete_Reflection_00232	16B	South Africa	8	Ventral	I14	Test	Heated	Heated
D9.1.10A.16	50	SK	Silcrete_Reflection_00050	10A	South Africa	2	Dorsal	D9	Test	Unheated	Unheated	0
D9.1.10A.16	51	SK	Silcrete_Reflection_00051	10A	South Africa	3	Dorsal	D9	Test	Unheated	Heated
D9.1.10A.16	52	SK	Silcrete_Reflection_00052	10A	South Africa	4	Dorsal	D9	Test	Unheated	Heated
D9.1.10A.16	54	SK	Silcrete_Reflection_00054	10A	South Africa	6	Ventral	D9	Test	Unheated	Unheated
D9.1.10A.16	55	SK	Silcrete_Reflection_00055	10A	South Africa	7	Ventral	D9	Test	Unheated	Unheated
D9.1.10A.16	56	SK	Silcrete_Reflection_00056	10A	South Africa	8	Ventral	D9	Test	Unheated	Heated
D9.1.12A.38	639	JM	Silcrete_Reflection_00639	12A	South Africa	1	Dorsal	D9	Test	Unheated	Unheated	1
D9.1.12A.38	640	JM	Silcrete_Reflection_00640	12A	South Africa	2	Dorsal	D9	Test	Unheated	Unheated
D9.1.12A.38	641	JM	Silcrete_Reflection_00641	12A	South Africa	3	Dorsal	D9	Test	Unheated	Unheated
D9.1.12A.38	642	JM	Silcrete_Reflection_00642	12A	South Africa	4	Dorsal	D9	Test	Unheated	Unheated
D9.1.12A.38	643	JM	Silcrete_Reflection_00643	12A	South Africa	5	Ventral	D9	Test	Unheated	Unheated
D9.1.12A.38	644	JM	Silcrete_Reflection_00644	12A	South Africa	6	Ventral	D9	Test	Unheated	Unheated
D9.1.12A.38	645	JM	Silcrete_Reflection_00645	12A	South Africa	7	Ventral	D9	Test	Unheated	Unheated
D9.1.12A.38	646	JM	Silcrete_Reflection_00646	12A	South Africa	8	Ventral	D9	Test	Unheated	Unheated
D9.1.12C.16	89	JM	Silcrete_Reflection_00089	12C	South Africa	1	Dorsal	D9	Test	Unheated	Unheated	1
D9.1.12C.16	90	JM	Silcrete_Reflection_00090	12C	South Africa	2	Dorsal	D9	Test	Unheated	Unheated
D9.1.12C.16	91	JM	Silcrete_Reflection_00091	12C	South Africa	3	Dorsal	D9	Test	Unheated	Unheated
D9.1.12C.16	92	JM	Silcrete_Reflection_00092	12C	South Africa	4	Dorsal	D9	Test	Unheated	Unheated
D9.1.12C.16	93	JM	Silcrete_Reflection_00093	12C	South Africa	5	Ventral	D9	Test	Unheated	Unheated
D9.1.12C.16	94	JM	Silcrete_Reflection_00094	12C	South Africa	6	Ventral	D9	Test	Unheated	Unheated
D9.1.12C.16	95	JM	Silcrete_Reflection_00095	12C	South Africa	7	Ventral	D9	Test	Unheated	Unheated
D9.1.12C.16	96	JM	Silcrete_Reflection_00096	12C	South Africa	8	Ventral	D9	Test	Unheated	Unheated
E3.1.1A.14	759	JM	Silcrete_Reflection_00759	1A	South Africa	1	Dorsal	E3	Test	Unheated	Unheated	1
E3.1.1A.14	760	JM	Silcrete_Reflection_00760	1A	South Africa	2	Dorsal	E3	Test	Unheated	Unheated
E3.1.1A.14	761	JM	Silcrete_Reflection_00761	1A	South Africa	3	Dorsal	E3	Test	Unheated	Heated
E3.1.1A.14	762	JM	Silcrete_Reflection_00762	1A	South Africa	4	Dorsal	E3	Test	Unheated	Heated
E3.1.1A.14	763	JM	Silcrete_Reflection_00763	1A	South Africa	5	Ventral	E3	Test	Unheated	Unheated
E3.1.1A.14	764	JM	Silcrete_Reflection_00764	1A	South Africa	6	Ventral	E3	Test	Unheated	Unheated
E3.1.1A.14	765	JM	Silcrete_Reflection_00765	1A	South Africa	7	Ventral	E3	Test	Unheated	Unheated
E3.1.1A.14	766	JM	Silcrete_Reflection_00766	1A	South Africa	8	Ventral	E3	Test	Unheated	Unheated
E3.1.1A.48	751	JM	Silcrete_Reflection_00751	1A	South Africa	1	Dorsal	E3	Test	Unheated	Unheated	1
E3.1.1A.48	752	JM	Silcrete_Reflection_00752	1A	South Africa	2	Dorsal	E3	Test	Unheated	Unheated
E3.1.1A.48	753	JM	Silcrete_Reflection_00753	1A	South Africa	3	Dorsal	E3	Test	Unheated	Unheated
E3.1.1A.48	754	JM	Silcrete_Reflection_00754	1A	South Africa	4	Dorsal	E3	Test	Unheated	Unheated
E3.1.1A.48	755	JM	Silcrete_Reflection_00755	1A	South Africa	5	Ventral	E3	Test	Unheated	Unheated
E3.1.1A.48	756	JM	Silcrete_Reflection_00756	1A	South Africa	6	Ventral	E3	Test	Unheated	Unheated
E3.1.1A.48	757	JM	Silcrete_Reflection_00757	1A	South Africa	7	Ventral	E3	Test	Unheated	Unheated
I14.2.16A.44	839	JM	Silcrete_Reflection_00839	16A	South Africa	1	Dorsal	I14	Test	Unheated	Unheated	1
I14.2.16A.44	840	JM	Silcrete_Reflection_00840	16A	South Africa	2	Dorsal	I14	Test	Unheated	Unheated
I14.2.16A.44	841	JM	Silcrete_Reflection_00841	16A	South Africa	3	Dorsal	I14	Test	Unheated	Unheated
I14.2.16A.44	842	JM	Silcrete_Reflection_00842	16A	South Africa	4	Dorsal	I14	Test	Unheated	Unheated
I14.2.16A.44	843	JM	Silcrete_Reflection_00843	16A	South Africa	5	Ventral	I14	Test	Unheated	Unheated
I14.2.16A.44	844	JM	Silcrete_Reflection_00844	16A	South Africa	6	Ventral	I14	Test	Unheated	Unheated
I14.2.16A.44	845	JM	Silcrete_Reflection_00845	16A	South Africa	7	Ventral	I14	Test	Unheated	Unheated
I14.2.16A.44	846	JM	Silcrete_Reflection_00846	16A	South Africa	8	Ventral	I14	Test	Unheated	Unheated
E3.1.6A.38	719	JM	Silcrete_Reflection_00719	6A	South Africa	1	Dorsal	E3	Validation	Heated	Heated	1		# of specimens in the Validation set: 10
E3.1.6A.38	720	JM	Silcrete_Reflection_00720	6A	South Africa	2	Dorsal	E3	Validation	Heated	Heated			# of specimens with correct prediction, predicted treatment assigned is based on simple majority of associated observations: 9
E3.1.6A.38	721	JM	Silcrete_Reflection_00721	6A	South Africa	3	Dorsal	E3	Validation	Heated	Heated			# specimens with incorrect prediction: 1
E3.1.6A.38	722	JM	Silcrete_Reflection_00722	6A	South Africa	4	Dorsal	E3	Validation	Heated	Heated			# specimens with a tie, unable to assign treatment: 0
E3.1.6A.38	723	JM	Silcrete_Reflection_00723	6A	South Africa	5	Ventral	E3	Validation	Heated	Heated			# of specimens with inconsistent predictions from associated observations: 4
E3.1.6A.38	724	JM	Silcrete_Reflection_00724	6A	South Africa	6	Ventral	E3	Validation	Heated	Heated
E3.1.6A.38	725	JM	Silcrete_Reflection_00725	6A	South Africa	7	Ventral	E3	Validation	Heated	Heated
E3.1.6A.38	726	JM	Silcrete_Reflection_00726	6A	South Africa	8	Ventral	E3	Validation	Heated	Heated
E3.1.6A.61	687	JM	Silcrete_Reflection_00687	6A	South Africa	1	Dorsal	E3	Validation	Heated	Heated	1
E3.1.6A.61	688	JM	Silcrete_Reflection_00688	6A	South Africa	2	Dorsal	E3	Validation	Heated	Heated
E3.1.6A.61	689	JM	Silcrete_Reflection_00689	6A	South Africa	3	Dorsal	E3	Validation	Heated	Heated
E3.1.6A.61	690	JM	Silcrete_Reflection_00690	6A	South Africa	4	Dorsal	E3	Validation	Heated	Heated
E3.1.6A.61	691	JM	Silcrete_Reflection_00691	6A	South Africa	5	Ventral	E3	Validation	Heated	Heated
E3.1.6A.61	692	JM	Silcrete_Reflection_00692	6A	South Africa	6	Ventral	E3	Validation	Heated	Heated
E3.1.6A.61	693	JM	Silcrete_Reflection_00693	6A	South Africa	7	Ventral	E3	Validation	Heated	Heated
E3.1.6A.61	694	JM	Silcrete_Reflection_00694	6A	South Africa	8	Ventral	E3	Validation	Heated	Heated
I14.2.16B.47	871	JM	Silcrete_Reflection_00871	16B	South Africa	1	Dorsal	I14	Validation	Heated	Heated	1
I14.2.16B.47	872	JM	Silcrete_Reflection_00872	16B	South Africa	2	Dorsal	I14	Validation	Heated	Heated
I14.2.16B.47	873	JM	Silcrete_Reflection_00873	16B	South Africa	3	Dorsal	I14	Validation	Heated	Heated
I14.2.16B.47	874	JM	Silcrete_Reflection_00874	16B	South Africa	4	Dorsal	I14	Validation	Heated	Heated
I14.2.16B.47	875	JM	Silcrete_Reflection_00875	16B	South Africa	5	Ventral	I14	Validation	Heated	Heated
I14.2.16B.47	876	JM	Silcrete_Reflection_00876	16B	South Africa	6	Ventral	I14	Validation	Heated	Heated
I14.2.16B.47	877	JM	Silcrete_Reflection_00877	16B	South Africa	7	Ventral	I14	Validation	Heated	Heated
I14.2.16B.47	878	JM	Silcrete_Reflection_00878	16B	South Africa	8	Ventral	I14	Validation	Heated	Heated
I14.2.16B.5	137	SK	Silcrete_Reflection_00137	16B	South Africa	1	Dorsal	I14	Validation	Heated	Heated	1
I14.2.16B.5	138	SK	Silcrete_Reflection_00138	16B	South Africa	2	Dorsal	I14	Validation	Heated	Heated
I14.2.16B.5	139	SK	Silcrete_Reflection_00139	16B	South Africa	3	Dorsal	I14	Validation	Heated	Heated
I14.2.16B.5	140	SK	Silcrete_Reflection_00140	16B	South Africa	4	Dorsal	I14	Validation	Heated	Heated
I14.2.16B.5	141	SK	Silcrete_Reflection_00141	16B	South Africa	5	Ventral	I14	Validation	Heated	Unheated
I14.2.16B.5	142	SK	Silcrete_Reflection_00142	16B	South Africa	6	Ventral	I14	Validation	Heated	Unheated
I14.2.16B.5	143	SK	Silcrete_Reflection_00143	16B	South Africa	7	Ventral	I14	Validation	Heated	Heated
I14.2.16B.5	144	SK	Silcrete_Reflection_00144	16B	South Africa	8	Ventral	I14	Validation	Heated	Unheated
I14.2.16E.31	217	SK	Silcrete_Reflection_00217	16B	South Africa	1	Dorsal	I14	Validation	Heated	Unheated	0
I14.2.16E.31	218	SK	Silcrete_Reflection_00218	16B	South Africa	2	Dorsal	I14	Validation	Heated	Unheated
I14.2.16E.31	219	SK	Silcrete_Reflection_00219	16B	South Africa	3	Dorsal	I14	Validation	Heated	Heated
I14.2.16E.31	220	SK	Silcrete_Reflection_00220	16B	South Africa	4	Dorsal	I14	Validation	Heated	Heated
I14.2.16E.31	221	SK	Silcrete_Reflection_00221	16B	South Africa	5	Ventral	I14	Validation	Heated	Heated
I14.2.16E.31	222	SK	Silcrete_Reflection_00222	16B	South Africa	6	Ventral	I14	Validation	Heated	Unheated
I14.2.16E.31	223	SK	Silcrete_Reflection_00223	16B	South Africa	7	Ventral	I14	Validation	Heated	Unheated
I14.2.16E.31	224	SK	Silcrete_Reflection_00224	16B	South Africa	8	Ventral	I14	Validation	Heated	Unheated
D9.1.12C.36	33	SK	Silcrete_Reflection_00033	12C	South Africa	1	Dorsal	D9	Validation	Unheated	Unheated	1
D9.1.12C.36	34	SK	Silcrete_Reflection_00034	12C	South Africa	2	Dorsal	D9	Validation	Unheated	Unheated
D9.1.12C.36	35	SK	Silcrete_Reflection_00035	12C	South Africa	3	Dorsal	D9	Validation	Unheated	Unheated
D9.1.12C.36	36	SK	Silcrete_Reflection_00036	12C	South Africa	4	Dorsal	D9	Validation	Unheated	Unheated
D9.1.12C.36	37	SK	Silcrete_Reflection_00037	12C	South Africa	5	Ventral	D9	Validation	Unheated	Unheated
D9.1.12C.36	38	SK	Silcrete_Reflection_00038	12C	South Africa	6	Ventral	D9	Validation	Unheated	Unheated
D9.1.12C.36	39	SK	Silcrete_Reflection_00039	12C	South Africa	7	Ventral	D9	Validation	Unheated	Unheated
D9.1.12C.36	40	SK	Silcrete_Reflection_00040	12C	South Africa	8	Ventral	D9	Validation	Unheated	Unheated
D9.1.12C.40	97	SK	Silcrete_Reflection_00097	12c	South Africa	1	Dorsal	D9	Validation	Unheated	Unheated	1
D9.1.12C.40	98	SK	Silcrete_Reflection_00098	12c	South Africa	2	Dorsal	D9	Validation	Unheated	Unheated
D9.1.12C.40	99	SK	Silcrete_Reflection_00099	12c	South Africa	3	Dorsal	D9	Validation	Unheated	Unheated
D9.1.12C.40	100	SK	Silcrete_Reflection_00100	12c	South Africa	4	Dorsal	D9	Validation	Unheated	Unheated
D9.1.12C.40	101	SK	Silcrete_Reflection_00101	12c	South Africa	5	Ventral	D9	Validation	Unheated	Heated
D9.1.12C.40	102	SK	Silcrete_Reflection_00102	12c	South Africa	6	Ventral	D9	Validation	Unheated	Unheated
D9.1.12C.40	103	SK	Silcrete_Reflection_00103	12c	South Africa	7	Ventral	D9	Validation	Unheated	Unheated
D9.1.12C.40	104	SK	Silcrete_Reflection_00104	12c	South Africa	8	Ventral	D9	Validation	Unheated	Unheated
E3.1.5O.28	415	SK	Silcrete_Reflection_00415	5O	South Africa	1	Dorsal	E3	Validation	Unheated	Unheated	1
E3.1.5O.28	416	SK	Silcrete_Reflection_00416	5O	South Africa	2	Dorsal	E3	Validation	Unheated	Unheated
E3.1.5O.28	417	SK	Silcrete_Reflection_00417	5O	South Africa	3	Dorsal	E3	Validation	Unheated	Unheated
E3.1.5O.28	418	SK	Silcrete_Reflection_00418	5O	South Africa	4	Dorsal	E3	Validation	Unheated	Unheated
E3.1.5O.28	419	SK	Silcrete_Reflection_00419	5O	South Africa	5	Ventral	E3	Validation	Unheated	Unheated
E3.1.5O.28	420	SK	Silcrete_Reflection_00420	5O	South Africa	6	Ventral	E3	Validation	Unheated	Unheated
E3.1.5O.28	421	SK	Silcrete_Reflection_00421	5O	South Africa	7	Ventral	E3	Validation	Unheated	Unheated
E3.1.5O.28	422	SK	Silcrete_Reflection_00422	5O	South Africa	8	Ventral	E3	Validation	Unheated	Unheated
I14.2.16A.13	791		Silcrete_Reflection_00791	16A	South Africa	1	Dorsal	I14	Validation	Unheated	Unheated	1
I14.2.16A.13	792		Silcrete_Reflection_00792	16A	South Africa	2	Dorsal	I14	Validation	Unheated	Unheated
I14.2.16A.13	793		Silcrete_Reflection_00793	16A	South Africa	3	Dorsal	I14	Validation	Unheated	Unheated
I14.2.16A.13	794		Silcrete_Reflection_00794	16A	South Africa	4	Dorsal	I14	Validation	Unheated	Unheated
I14.2.16A.13	795		Silcrete_Reflection_00795	16A	South Africa	5	Ventral	I14	Validation	Unheated	Unheated
I14.2.16A.13	796		Silcrete_Reflection_00796	16A	South Africa	6	Ventral	I14	Validation	Unheated	Unheated
I14.2.16A.13	797		Silcrete_Reflection_00797	16A	South Africa	7	Ventral	I14	Validation	Unheated	Unheated
I14.2.16A.13	798		Silcrete_Reflection_00798	16A	South Africa	8	Ventral	I14	Validation	Unheated	Unheated
I14.2.16A.32	775	JM	Silcrete_Reflection_00775	16A	South Africa	1	Dorsal	I14	Validation	Unheated	Heated	1
I14.2.16A.32	776	JM	Silcrete_Reflection_00776	16A	South Africa	2	Dorsal	I14	Validation	Unheated	Heated
I14.2.16A.32	777	JM	Silcrete_Reflection_00777	16A	South Africa	3	Dorsal	I14	Validation	Unheated	Unheated
I14.2.16A.32	778	JM	Silcrete_Reflection_00778	16A	South Africa	4	Dorsal	I14	Validation	Unheated	Unheated
I14.2.16A.32	779	JM	Silcrete_Reflection_00779	16A	South Africa	5	Ventral	I14	Validation	Unheated	Unheated
I14.2.16A.32	780	JM	Silcrete_Reflection_00780	16A	South Africa	6	Ventral	I14	Validation	Unheated	Unheated
I14.2.16A.32	781	JM	Silcrete_Reflection_00781	16A	South Africa	7	Ventral	I14	Validation	Unheated	Unheated
I14.2.16A.32	782	JM	Silcrete_Reflection_00782	16A	South Africa	8	Ventral	I14	Validation	Unheated	Unheated
D9.1.10B.18	375	SK	Silcrete_Reflection_00375	10B	South Africa	1	Dorsal	D9	Training	Heated	Heated	1		# of specimens in the Training set: 73
D9.1.10B.18	376	SK	Silcrete_Reflection_00376	10B	South Africa	2	Dorsal	D9	Training	Heated	Heated			# of specimens with correct prediction, predicted treatment assigned is based on simple majority of associated observations: 68
D9.1.10B.18	377	SK	Silcrete_Reflection_00377	10B	South Africa	3	Dorsal	D9	Training	Heated	Heated			# specimens with incorrect prediction: 3
D9.1.10B.18	378	SK	Silcrete_Reflection_00378	10B	South Africa	4	Dorsal	D9	Training	Heated	Heated			# specimens with a tie, unable to assign treatment: 2
D9.1.10B.18	379	SK	Silcrete_Reflection_00379	10B	South Africa	5	Ventral	D9	Training	Heated	Heated			# of specimens with inconsistent predictions from associated observations: 36
D9.1.10B.18	380	SK	Silcrete_Reflection_00380	10B	South Africa	6	Ventral	D9	Training	Heated	Heated
D9.1.10B.18	381	SK	Silcrete_Reflection_00381	10B	South Africa	7	Ventral	D9	Training	Heated	Heated
D9.1.10B.31	1	SK	Silcrete_Reflection_00001	10B	South Africa	1	Dorsal	D9	Training	Heated	Heated	1
D9.1.10B.31	3	SK	Silcrete_Reflection_00003	10B	South Africa	3	Dorsal	D9	Training	Heated	Heated
D9.1.10B.31	4	SK	Silcrete_Reflection_00004	10B	South Africa	4	Dorsal	D9	Training	Heated	Heated
D9.1.10B.31	5	SK	Silcrete_Reflection_00005	10B	South Africa	5	Ventral	D9	Training	Heated	Heated
D9.1.10B.31	7	SK	Silcrete_Reflection_00007	10B	South Africa	7	Ventral	D9	Training	Heated	Heated
D9.1.10B.31	8	SK	Silcrete_Reflection_00008	10B	South Africa	8	Ventral	D9	Training	Heated	Heated
D9.1.10B.39	9	SK	Silcrete_Reflection_00009	10B	South Africa	1	Dorsal	D9	Training	Heated	Heated	1
D9.1.10B.39	10	SK	Silcrete_Reflection_00010	10B	South Africa	2	Dorsal	D9	Training	Heated	Heated
D9.1.10B.39	11	SK	Silcrete_Reflection_00011	10B	South Africa	3	Dorsal	D9	Training	Heated	Heated
D9.1.10B.39	12	SK	Silcrete_Reflection_00012	10B	South Africa	4	Dorsal	D9	Training	Heated	Heated
D9.1.10B.39	13	SK	Silcrete_Reflection_00013	10B	South Africa	5	Ventral	D9	Training	Heated	Heated
D9.1.10B.39	14	SK	Silcrete_Reflection_00014	10B	South Africa	6	Ventral	D9	Training	Heated	Heated
D9.1.10B.39	15	SK	Silcrete_Reflection_00015	10B	South Africa	7	Ventral	D9	Training	Heated	Heated
D9.1.10B.39	16	SK	Silcrete_Reflection_00016	10B	South Africa	8	Ventral	D9	Training	Heated	Heated
D9.1.10B.6A	297	SK	Silcrete_Reflection_00297	10B	South Africa	1	Dorsal	D9	Training	Heated	Heated	1
D9.1.10B.6A	298	SK	Silcrete_Reflection_00298	10B	South Africa	2	Dorsal	D9	Training	Heated	Heated
D9.1.10B.6A	299	SK	Silcrete_Reflection_00299	10B	South Africa	3	Dorsal	D9	Training	Heated	Heated
D9.1.10B.6A	300	SK	Silcrete_Reflection_00300	10B	South Africa	4	Dorsal	D9	Training	Heated	Heated
D9.1.10B.6A	301	SK	Silcrete_Reflection_00301	10B	South Africa	5	Ventral	D9	Training	Heated	Heated
D9.1.10B.6A	302	SK	Silcrete_Reflection_00302	10B	South Africa	6	Ventral	D9	Training	Heated	Heated
D9.1.10B.6A	303	SK	Silcrete_Reflection_00303	10B	South Africa	7	Ventral	D9	Training	Heated	Heated
D9.1.10B.6A	304	SK	Silcrete_Reflection_00304	10B	South Africa	8	Ventral	D9	Training	Heated	Heated
D9.1.10B.6A	317	ET	Silcrete_Reflection_00317	10B	South Africa	1	Ventral	D9	Training	Heated	Heated
D9.1.10B.6A	318	ET	Silcrete_Reflection_00318	10B	South Africa	2	Ventral	D9	Training	Heated	Heated
D9.1.10B.6A	319	ET	Silcrete_Reflection_00319	10B	South Africa	3	Ventral	D9	Training	Heated	Heated
D9.1.10B.6A	320	ET	Silcrete_Reflection_00320	10B	South Africa	4	Ventral	D9	Training	Heated	Heated
D9.1.10B.6A	321	ET	Silcrete_Reflection_00321	10B	South Africa	5	Dorsal	D9	Training	Heated	Heated
D9.1.10B.6A	322	ET	Silcrete_Reflection_00322	10B	South Africa	6	Dorsal	D9	Training	Heated	Heated
D9.1.10B.6A	323	ET	Silcrete_Reflection_00323	10B	South Africa	7	Dorsal	D9	Training	Heated	Heated
D9.1.10B.6A	324	ET	Silcrete_Reflection_00324	10B	South Africa	8	Dorsal	D9	Training	Heated	Heated
D9.1.10B.6B	305	SK	Silcrete_Reflection_00305	10B	South Africa	1	Dorsal	D9	Training	Heated	Heated	1
D9.1.10B.6B	306	SK	Silcrete_Reflection_00306	10B	South Africa	2	Dorsal	D9	Training	Heated	Heated
D9.1.10B.6B	307	SK	Silcrete_Reflection_00307	10B	South Africa	3	Dorsal	D9	Training	Heated	Heated
D9.1.10B.6B	308	SK	Silcrete_Reflection_00308	10B	South Africa	4	Dorsal	D9	Training	Heated	Heated
D9.1.10B.6B	309	ET	Silcrete_Reflection_00309	10B	South Africa	5	Ventral	D9	Training	Heated	Heated
D9.1.10B.6B	310	ET	Silcrete_Reflection_00310	10B	South Africa	6	Ventral	D9	Training	Heated	Heated
D9.1.10B.6B	311	ET	Silcrete_Reflection_00311	10B	South Africa	7	Ventral	D9	Training	Heated	Heated
D9.1.10B.6B	312	ET	Silcrete_Reflection_00312	10B	South Africa	8	Ventral	D9	Training	Heated	Heated
D9.1.10B.6B	313	ET	Silcrete_Reflection_00313	10B	South Africa	1	Dorsal	D9	Training	Heated	Heated
D9.1.10B.6B	314	ET	Silcrete_Reflection_00314	10B	South Africa	2	Dorsal	D9	Training	Heated	Heated
D9.1.10B.6B	315	ET	Silcrete_Reflection_00315	10B	South Africa	3	Dorsal	D9	Training	Heated	Heated
D9.1.10B.6B	316	ET	Silcrete_Reflection_00316	10B	South Africa	4	Dorsal	D9	Training	Heated	Heated
D9.1.10B.6B	361	SK	Silcrete_Reflection_00361	10B	South Africa	5	Ventral	D9	Training	Heated	Heated
D9.1.10B.6B	362	SK	Silcrete_Reflection_00362	10B	South Africa	6	Ventral	D9	Training	Heated	Heated
D9.1.10B.6B	363	SK	Silcrete_Reflection_00363	10B	South Africa	7	Ventral	D9	Training	Heated	Heated
D9.1.10B.6B	364	SK	Silcrete_Reflection_00364	10B	South Africa	8	Ventral	D9	Training	Heated	Heated
D9.1.12B.18	664	JM	Silcrete_Reflection_00664	12B	South Africa	2	Dorsal	D9	Training	Heated	Heated	1
D9.1.12B.18	665	JM	Silcrete_Reflection_00665	12B	South Africa	3	Dorsal	D9	Training	Heated	Heated
D9.1.12B.18	666	JM	Silcrete_Reflection_00666	12B	South Africa	4	Dorsal	D9	Training	Heated	Heated
D9.1.12B.18	667	JM	Silcrete_Reflection_00667	12B	South Africa	5	Ventral	D9	Training	Heated	Heated
D9.1.12B.18	668	JM	Silcrete_Reflection_00668	12B	South Africa	6	Ventral	D9	Training	Heated	Heated
D9.1.12B.18	669	JM	Silcrete_Reflection_00669	12B	South Africa	7	Ventral	D9	Training	Heated	Heated
D9.1.12B.18	670	JM	Silcrete_Reflection_00670	12B	South Africa	8	Ventral	D9	Training	Heated	Heated
D9.1.12B.22	647	JM	Silcrete_Reflection_00647	12B	South Africa	1	Dorsal	D9	Training	Heated	Heated	1
D9.1.12B.22	648	JM	Silcrete_Reflection_00648	12B	South Africa	2	Dorsal	D9	Training	Heated	Heated
D9.1.12B.22	649	JM	Silcrete_Reflection_00649	12B	South Africa	3	Dorsal	D9	Training	Heated	Heated
D9.1.12B.22	650	JM	Silcrete_Reflection_00650	12B	South Africa	4	Dorsal	D9	Training	Heated	Heated
D9.1.12B.22	651	JM	Silcrete_Reflection_00651	12B	South Africa	5	Ventral	D9	Training	Heated	Heated
D9.1.12B.22	652	JM	Silcrete_Reflection_00652	12B	South Africa	6	Ventral	D9	Training	Heated	Heated
D9.1.12B.22	653	JM	Silcrete_Reflection_00653	12B	South Africa	7	Ventral	D9	Training	Heated	Heated
D9.1.12B.22	654	JM	Silcrete_Reflection_00654	12B	South Africa	8	Ventral	D9	Training	Heated	Heated
D9.1.12B.27a	679	JM	Silcrete_Reflection_00679	12B	South Africa	1	Dorsal	D9	Training	Heated	Unheated	1
D9.1.12B.27a	680	JM	Silcrete_Reflection_00680	12B	South Africa	2	Dorsal	D9	Training	Heated	Heated
D9.1.12B.27a	681	JM	Silcrete_Reflection_00681	12B	South Africa	3	Dorsal	D9	Training	Heated	Unheated
D9.1.12B.27a	682	JM	Silcrete_Reflection_00682	12B	South Africa	4	Dorsal	D9	Training	Heated	Heated
D9.1.12B.27a	683	JM	Silcrete_Reflection_00683	12B	South Africa	5	Ventral	D9	Training	Heated	Heated
D9.1.12B.27a	684	JM	Silcrete_Reflection_00684	12B	South Africa	6	Ventral	D9	Training	Heated	Heated
D9.1.12B.27a	685	JM	Silcrete_Reflection_00685	12B	South Africa	7	Ventral	D9	Training	Heated	Heated
D9.1.12B.27a	686	JM	Silcrete_Reflection_00686	12B	South Africa	8	Ventral	D9	Training	Heated	Heated
D9.1.12B.29	671	JM	Silcrete_Reflection_00671	12B	South Africa	1	Dorsal	D9	Training	Heated	Heated	1
D9.1.12B.29	672	JM	Silcrete_Reflection_00672	12B	South Africa	2	Dorsal	D9	Training	Heated	Heated
D9.1.12B.29	673	JM	Silcrete_Reflection_00673	12B	South Africa	3	Dorsal	D9	Training	Heated	Heated
D9.1.12B.29	674	JM	Silcrete_Reflection_00674	12B	South Africa	4	Dorsal	D9	Training	Heated	Heated
D9.1.12B.29	675	JM	Silcrete_Reflection_00675	12B	South Africa	5	Ventral	D9	Training	Heated	Heated
D9.1.12B.29	676	JM	Silcrete_Reflection_00676	12B	South Africa	6	Ventral	D9	Training	Heated	Unheated
D9.1.12B.29	677	JM	Silcrete_Reflection_00677	12B	South Africa	7	Ventral	D9	Training	Heated	Heated
D9.1.12B.29	678	JM	Silcrete_Reflection_00678	12B	South Africa	8	Ventral	D9	Training	Heated	Heated
D9.1.12B.37	655	JM	Silcrete_Reflection_00655	12B	South Africa	1	Dorsal	D9	Training	Heated	Heated	1
D9.1.12B.37	656	JM	Silcrete_Reflection_00656	12B	South Africa	2	Dorsal	D9	Training	Heated	Heated
D9.1.12B.37	657	JM	Silcrete_Reflection_00657	12B	South Africa	3	Dorsal	D9	Training	Heated	Heated
D9.1.12B.37	658	JM	Silcrete_Reflection_00658	12B	South Africa	4	Dorsal	D9	Training	Heated	Heated
D9.1.12B.37	659	JM	Silcrete_Reflection_00659	12B	South Africa	5	Ventral	D9	Training	Heated	Heated
D9.1.12B.37	660	JM	Silcrete_Reflection_00660	12B	South Africa	6	Ventral	D9	Training	Heated	Heated
D9.1.12B.37	661	JM	Silcrete_Reflection_00661	12B	South Africa	7	Ventral	D9	Training	Heated	Heated
D9.1.12B.37	662	JM	Silcrete_Reflection_00662	12B	South Africa	8	Ventral	D9	Training	Heated	Heated
D9.1.12D.49	17	JM	Silcrete_Reflection_00017	12D	South Africa	1	Dorsal	D9	Training	Heated	Unheated	0
D9.1.12D.49	18	JM	Silcrete_Reflection_00018	12D	South Africa	2	Dorsal	D9	Training	Heated	Unheated
D9.1.12D.49	19	JM	Silcrete_Reflection_00019	12D	South Africa	3	Dorsal	D9	Training	Heated	Heated
D9.1.12D.49	20	JM	Silcrete_Reflection_00020	12D	South Africa	4	Dorsal	D9	Training	Heated	Heated
D9.1.12D.49	21	JM	Silcrete_Reflection_00021	12D	South Africa	5	Ventral	D9	Training	Heated	Unheated
D9.1.12D.49	22	JM	Silcrete_Reflection_00022	12D	South Africa	6	Ventral	D9	Training	Heated	Heated
D9.1.12D.49	23	JM	Silcrete_Reflection_00023	12D	South Africa	7	Ventral	D9	Training	Heated	Unheated
D9.1.12D.49	24	JM	Silcrete_Reflection_00024	12D	South Africa	8	Ventral	D9	Training	Heated	Unheated
D9.1.12D.50	25	JM	Silcrete_Reflection_00025	12D	South Africa	1	Dorsal	D9	Training	Heated	Unheated	0
D9.1.12D.50	26	JM	Silcrete_Reflection_00026	12D	South Africa	2	Dorsal	D9	Training	Heated	Unheated
D9.1.12D.50	27	JM	Silcrete_Reflection_00027	12D	South Africa	3	Dorsal	D9	Training	Heated	Heated
D9.1.12D.50	28	JM	Silcrete_Reflection_00028	12D	South Africa	4	Dorsal	D9	Training	Heated	Unheated
D9.1.12D.50	29	JM	Silcrete_Reflection_00029	12D	South Africa	5	Ventral	D9	Training	Heated	Heated
D9.1.12D.50	30	JM	Silcrete_Reflection_00030	12D	South Africa	6	Ventral	D9	Training	Heated	Heated
D9.1.12D.50	31	JM	Silcrete_Reflection_00031	12D	South Africa	7	Ventral	D9	Training	Heated	Heated
D9.1.12D.50	32	JM	Silcrete_Reflection_00032	12D	South Africa	8	Ventral	D9	Training	Heated	Unheated
D9.1.12D.50	57	SK	Silcrete_Reflection_00057	12D	South Africa	1	Dorsal	D9	Training	Heated	Unheated
D9.1.12D.50	59	SK	Silcrete_Reflection_00059	12D	South Africa	3	Dorsal	D9	Training	Heated	Heated
D9.1.12D.50	61	SK	Silcrete_Reflection_00061	12D	South Africa	5	Ventral	D9	Training	Heated	Heated
D9.1.12D.50	62	SK	Silcrete_Reflection_00062	12D	South Africa	6	Ventral	D9	Training	Heated	Heated
D9.1.12D.50	63	SK	Silcrete_Reflection_00063	12D	South Africa	7	Ventral	D9	Training	Heated	Unheated
D9.1.12D.50	64	SK	Silcrete_Reflection_00064	12D	South Africa	8	Ventral	D9	Training	Heated	Unheated
E3.1.1B.10	265	ET	Silcrete_Reflection_00265	1B	South Africa	1	Dorsal	E3	Training	Heated	Heated	1
E3.1.1B.10	266	ET	Silcrete_Reflection_00266	1B	South Africa	2	Dorsal	E3	Training	Heated	Heated
E3.1.1B.10	267	ET	Silcrete_Reflection_00267	1B	South Africa	3	Dorsal	E3	Training	Heated	Heated
E3.1.1B.10	268	ET	Silcrete_Reflection_00268	1B	South Africa	4	Dorsal	E3	Training	Heated	Heated
E3.1.1B.10	269	ET	Silcrete_Reflection_00269	1B	South Africa	5	Ventral	E3	Training	Heated	Heated
E3.1.1B.10	270	ET	Silcrete_Reflection_00270	1B	South Africa	6	Ventral	E3	Training	Heated	Heated
E3.1.1B.10	271	ET	Silcrete_Reflection_00271	1B	South Africa	7	Ventral	E3	Training	Heated	Heated
E3.1.1B.10	272	ET	Silcrete_Reflection_00272	1B	South Africa	8	Ventral	E3	Training	Heated	Heated
E3.1.1B.18	81	JM	Silcrete_Reflection_00081	1B	South Africa	1	Dorsal	E3	Training	Heated	Heated	1
E3.1.1B.18	82	JM	Silcrete_Reflection_00082	1B	South Africa	2	Dorsal	E3	Training	Heated	Heated
E3.1.1B.18	83	JM	Silcrete_Reflection_00083	1B	South Africa	3	Dorsal	E3	Training	Heated	Heated
E3.1.1B.18	84	JM	Silcrete_Reflection_00084	1B	South Africa	4	Dorsal	E3	Training	Heated	Heated
E3.1.1B.18	85	JM	Silcrete_Reflection_00085	1B	South Africa	5	Ventral	E3	Training	Heated	Heated
E3.1.1B.18	86	JM	Silcrete_Reflection_00086	1B	South Africa	6	Ventral	E3	Training	Heated	Heated
E3.1.1B.18	87	JM	Silcrete_Reflection_00087	1B	South Africa	7	Ventral	E3	Training	Heated	Heated
E3.1.1B.18	88	JM	Silcrete_Reflection_00088	1B	South Africa	8	Ventral	E3	Training	Heated	Heated
E3.1.1B.2	258	ET	Silcrete_Reflection_00258	1B	South Africa	2	Dorsal	E3	Training	Heated	Heated	1
E3.1.1B.2	260	ET	Silcrete_Reflection_00260	1B	South Africa	4	Dorsal	E3	Training	Heated	Heated
E3.1.1B.2	263	ET	Silcrete_Reflection_00263	1B	South Africa	7	Ventral	E3	Training	Heated	Heated
E3.1.1B.2	264	ET	Silcrete_Reflection_00264	1B	South Africa	8	Ventral	E3	Training	Heated	Heated
E3.1.1B.24	432	SK	Silcrete_Reflection_00432	1B	South Africa	2	Dorsal	E3	Training	Heated	Heated	1
E3.1.1B.24	433	SK	Silcrete_Reflection_00433	1B	South Africa	3	Dorsal	E3	Training	Heated	Heated
E3.1.1B.24	434	SK	Silcrete_Reflection_00434	1B	South Africa	4	Dorsal	E3	Training	Heated	Heated
E3.1.1B.24	435	SK	Silcrete_Reflection_00435	1B	South Africa	5	Ventral	E3	Training	Heated	Heated
E3.1.1B.24	436	SK	Silcrete_Reflection_00436	1B	South Africa	6	Ventral	E3	Training	Heated	Heated
E3.1.1B.24	437	SK	Silcrete_Reflection_00437	1B	South Africa	7	Ventral	E3	Training	Heated	Heated
E3.1.1B.24	438	SK	Silcrete_Reflection_00438	1B	South Africa	8	Ventral	E3	Training	Heated	Heated
E3.1.1B.27	113	SK	Silcrete_Reflection_00113	1b	South Africa	1	Dorsal	E3	Training	Heated	Heated	1
E3.1.1B.27	114	SK	Silcrete_Reflection_00114	1b	South Africa	2	Dorsal	E3	Training	Heated	Heated
E3.1.1B.27	115	SK	Silcrete_Reflection_00115	1b	South Africa	3	Dorsal	E3	Training	Heated	Heated
E3.1.1B.27	116	SK	Silcrete_Reflection_00116	1b	South Africa	4	Dorsal	E3	Training	Heated	Heated
E3.1.1B.27	117	SK	Silcrete_Reflection_00117	1b	South Africa	5	Ventral	E3	Training	Heated	Heated
E3.1.1B.27	118	SK	Silcrete_Reflection_00118	1b	South Africa	6	Ventral	E3	Training	Heated	Heated
E3.1.1B.27	119	SK	Silcrete_Reflection_00119	1b	South Africa	7	Ventral	E3	Training	Heated	Heated
E3.1.1B.27	120	SK	Silcrete_Reflection_00120	1b	South Africa	8	Ventral	E3	Training	Heated	Heated
E3.1.1B.8	73	SK	Silcrete_Reflection_00073	1B	South Africa	1	Dorsal	E3	Training	Heated	Heated	1
E3.1.1B.8	74	SK	Silcrete_Reflection_00074	1B	South Africa	2	Dorsal	E3	Training	Heated	Heated
E3.1.1B.8	75	SK	Silcrete_Reflection_00075	1B	South Africa	3	Dorsal	E3	Training	Heated	Heated
E3.1.1B.8	76	SK	Silcrete_Reflection_00076	1B	South Africa	4	Dorsal	E3	Training	Heated	Heated
E3.1.1B.8	77	SK	Silcrete_Reflection_00077	1B	South Africa	5	Ventral	E3	Training	Heated	Heated
E3.1.1B.8	78	SK	Silcrete_Reflection_00078	1B	South Africa	6	Ventral	E3	Training	Heated	Heated
E3.1.1B.8	79	SK	Silcrete_Reflection_00079	1B	South Africa	7	Ventral	E3	Training	Heated	Heated
E3.1.1B.8	80	SK	Silcrete_Reflection_00080	1B	South Africa	8	Ventral	E3	Training	Heated	Heated
E3.1.5P.14	407	SK	Silcrete_Reflection_00407	5P	South Africa	1	Dorsal	E3	Training	Heated	Heated	1
E3.1.5P.14	408	SK	Silcrete_Reflection_00408	5P	South Africa	2	Dorsal	E3	Training	Heated	Heated
E3.1.5P.14	409	SK	Silcrete_Reflection_00409	5P	South Africa	3	Dorsal	E3	Training	Heated	Heated
E3.1.5P.14	410	SK	Silcrete_Reflection_00410	5P	South Africa	4	Dorsal	E3	Training	Heated	Heated
E3.1.5P.14	411	SK	Silcrete_Reflection_00411	5P	South Africa	5	Ventral	E3	Training	Heated	Heated
E3.1.5P.14	412	SK	Silcrete_Reflection_00412	5P	South Africa	6	Ventral	E3	Training	Heated	Heated
E3.1.5P.14	413	SK	Silcrete_Reflection_00413	5P	South Africa	7	Ventral	E3	Training	Heated	Heated
E3.1.5P.14	414	SK	Silcrete_Reflection_00414	5P	South Africa	8	Ventral	E3	Training	Heated	Heated
E3.1.5P.23	383	SK	Silcrete_Reflection_00383	5P	South Africa	1	Dorsal	E3	Training	Heated	Heated	1
E3.1.5P.23	384	SK	Silcrete_Reflection_00384	5P	South Africa	2	Dorsal	E3	Training	Heated	Heated
E3.1.5P.23	385	SK	Silcrete_Reflection_00385	5P	South Africa	3	Dorsal	E3	Training	Heated	Heated
E3.1.5P.23	386	SK	Silcrete_Reflection_00386	5P	South Africa	4	Dorsal	E3	Training	Heated	Heated
E3.1.5P.23	387	SK	Silcrete_Reflection_00387	5P	South Africa	5	Ventral	E3	Training	Heated	Heated
E3.1.5P.23	388	SK	Silcrete_Reflection_00388	5P	South Africa	6	Ventral	E3	Training	Heated	Heated
E3.1.5P.23	389	SK	Silcrete_Reflection_00389	5P	South Africa	7	Ventral	E3	Training	Heated	Heated
E3.1.5P.23	390	SK	Silcrete_Reflection_00390	5P	South Africa	8	Ventral	E3	Training	Heated	Heated
E3.1.5P.47	463	ET	Silcrete_Reflection_00463	5P	South Africa	1	Dorsal	E3	Training	Heated	Heated	1
E3.1.5P.47	464	ET	Silcrete_Reflection_00464	5P	South Africa	2	Dorsal	E3	Training	Heated	Heated
E3.1.5P.47	465	ET	Silcrete_Reflection_00465	5P	South Africa	3	Dorsal	E3	Training	Heated	Heated
E3.1.5P.47	466	ET	Silcrete_Reflection_00466	5P	South Africa	4	Dorsal	E3	Training	Heated	Heated
E3.1.5P.47	467	ET	Silcrete_Reflection_00467	5P	South Africa	5	Ventral	E3	Training	Heated	Heated
E3.1.5P.47	468	ET	Silcrete_Reflection_00468	5P	South Africa	6	Ventral	E3	Training	Heated	Heated
E3.1.5P.47	469	ET	Silcrete_Reflection_00469	5P	South Africa	7	Ventral	E3	Training	Heated	Heated
E3.1.5P.47	470	ET	Silcrete_Reflection_00470	5P	South Africa	8	Ventral	E3	Training	Heated	Heated
E3.1.6A.34	695	JM	Silcrete_Reflection_00695	6A	South Africa	1	Dorsal	E3	Training	Heated	Heated	1
E3.1.6A.34	696	JM	Silcrete_Reflection_00696	6A	South Africa	2	Dorsal	E3	Training	Heated	Heated
E3.1.6A.34	697	JM	Silcrete_Reflection_00697	6A	South Africa	3	Dorsal	E3	Training	Heated	Heated
E3.1.6A.34	698	JM	Silcrete_Reflection_00698	6A	South Africa	4	Dorsal	E3	Training	Heated	Heated
E3.1.6A.34	699	JM	Silcrete_Reflection_00699	6A	South Africa	5	Ventral	E3	Training	Heated	Heated
E3.1.6A.34	700	JM	Silcrete_Reflection_00700	6A	South Africa	6	Ventral	E3	Training	Heated	Heated
E3.1.6A.34	701	JM	Silcrete_Reflection_00701	6A	South Africa	7	Ventral	E3	Training	Heated	Heated
E3.1.6A.34	702	JM	Silcrete_Reflection_00702	6A	South Africa	8	Ventral	E3	Training	Heated	Heated
E3.1.6A.36	703	JM	Silcrete_Reflection_00703	6A	South Africa	1	Dorsal	E3	Training	Heated	Heated	1
E3.1.6A.36	704	JM	Silcrete_Reflection_00704	6A	South Africa	2	Dorsal	E3	Training	Heated	Unheated
E3.1.6A.36	705	JM	Silcrete_Reflection_00705	6A	South Africa	3	Dorsal	E3	Training	Heated	Heated
E3.1.6A.36	706	JM	Silcrete_Reflection_00706	6A	South Africa	4	Dorsal	E3	Training	Heated	Heated
E3.1.6A.36	707	JM	Silcrete_Reflection_00707	6A	South Africa	5	Ventral	E3	Training	Heated	Heated
E3.1.6A.36	708	JM	Silcrete_Reflection_00708	6A	South Africa	6	Ventral	E3	Training	Heated	Heated
E3.1.6A.36	709	JM	Silcrete_Reflection_00709	6A	South Africa	7	Ventral	E3	Training	Heated	Heated
E3.1.6A.36	710	JM	Silcrete_Reflection_00710	6A	South Africa	8	Ventral	E3	Training	Heated	Heated
E3.1.6A.60	711	JM	Silcrete_Reflection_00711	6A	South Africa	1	Dorsal	E3	Training	Heated	Heated	1
E3.1.6A.60	712	JM	Silcrete_Reflection_00712	6A	South Africa	2	Dorsal	E3	Training	Heated	Heated
E3.1.6A.60	713	JM	Silcrete_Reflection_00713	6A	South Africa	3	Dorsal	E3	Training	Heated	Heated
E3.1.6A.60	714	JM	Silcrete_Reflection_00714	6A	South Africa	4	Dorsal	E3	Training	Heated	Heated
E3.1.6A.60	715	JM	Silcrete_Reflection_00715	6A	South Africa	5	Ventral	E3	Training	Heated	Heated
E3.1.6A.60	716	JM	Silcrete_Reflection_00716	6A	South Africa	6	Ventral	E3	Training	Heated	Heated
E3.1.6A.60	717	JM	Silcrete_Reflection_00717	6A	South Africa	7	Ventral	E3	Training	Heated	Heated
E3.1.6A.60	718	JM	Silcrete_Reflection_00718	6A	South Africa	8	Ventral	E3	Training	Heated	Heated
E3.1.6C.27	399	SK	Silcrete_Reflection_00399	6C	South Africa	1	Dorsal	E3	Training	Heated	Unheated	1
E3.1.6C.27	400	SK	Silcrete_Reflection_00400	6C	South Africa	2	Dorsal	E3	Training	Heated	Heated
E3.1.6C.27	401	SK	Silcrete_Reflection_00401	6C	South Africa	3	Dorsal	E3	Training	Heated	Unheated
E3.1.6C.27	402	SK	Silcrete_Reflection_00402	6C	South Africa	4	Dorsal	E3	Training	Heated	Heated
E3.1.6C.27	403	SK	Silcrete_Reflection_00403	6C	South Africa	5	Ventral	E3	Training	Heated	Heated
E3.1.6C.27	404	SK	Silcrete_Reflection_00404	6C	South Africa	6	Ventral	E3	Training	Heated	Heated
E3.1.6C.27	405	SK	Silcrete_Reflection_00405	6C	South Africa	7	Ventral	E3	Training	Heated	Heated
E3.1.6C.27	406	SK	Silcrete_Reflection_00406	6C	South Africa	8	Ventral	E3	Training	Heated	Unheated
E3.1.6C.4	105	SK	Silcrete_Reflection_00105	6C	South Africa	1	Dorsal	E3	Training	Heated	Heated	1
E3.1.6C.4	106	SK	Silcrete_Reflection_00106	6C	South Africa	2	Dorsal	E3	Training	Heated	Heated
E3.1.6C.4	107	SK	Silcrete_Reflection_00107	6C	South Africa	3	Dorsal	E3	Training	Heated	Heated
E3.1.6C.4	108	SK	Silcrete_Reflection_00108	6C	South Africa	4	Dorsal	E3	Training	Heated	Heated
E3.1.6C.4	109	SK	Silcrete_Reflection_00109	6C	South Africa	5	Ventral	E3	Training	Heated	Heated
E3.1.6C.4	110	SK	Silcrete_Reflection_00110	6C	South Africa	6	Ventral	E3	Training	Heated	Heated
E3.1.6C.4	111	SK	Silcrete_Reflection_00111	6C	South Africa	7	Ventral	E3	Training	Heated	Unheated
E3.1.6C.4	112	SK	Silcrete_Reflection_00112	6C	South Africa	8	Ventral	E3	Training	Heated	Heated
I14.2.16B.15	855	JM	Silcrete_Reflection_00855	16B	South Africa	1	Dorsal	I14	Training	Heated	Unheated	1
I14.2.16B.15	856	JM	Silcrete_Reflection_00856	16B	South Africa	2	Dorsal	I14	Training	Heated	Heated
I14.2.16B.15	857	JM	Silcrete_Reflection_00857	16B	South Africa	3	Dorsal	I14	Training	Heated	Heated
I14.2.16B.15	858	JM	Silcrete_Reflection_00858	16B	South Africa	4	Dorsal	I14	Training	Heated	Heated
I14.2.16B.15	859	JM	Silcrete_Reflection_00859	16B	South Africa	5	Ventral	I14	Training	Heated	Heated
I14.2.16B.15	860	JM	Silcrete_Reflection_00860	16B	South Africa	6	Ventral	I14	Training	Heated	Unheated
I14.2.16B.15	861	JM	Silcrete_Reflection_00861	16B	South Africa	7	Ventral	I14	Training	Heated	Unheated
I14.2.16B.15	862	JM	Silcrete_Reflection_00862	16B	South Africa	8	Ventral	I14	Training	Heated	Unheated
I14.2.16B.29	911	JM	Silcrete_Reflection_00911	16B	South Africa	1	Dorsal	I14	Training	Heated	Heated	1
I14.2.16B.29	912	JM	Silcrete_Reflection_00912	16B	South Africa	2	Dorsal	I14	Training	Heated	Heated
I14.2.16B.29	913	JM	Silcrete_Reflection_00913	16B	South Africa	3	Dorsal	I14	Training	Heated	Heated
I14.2.16B.29	914	JM	Silcrete_Reflection_00914	16B	South Africa	4	Dorsal	I14	Training	Heated	Heated
I14.2.16B.29	915	JM	Silcrete_Reflection_00915	16B	South Africa	5	Ventral	I14	Training	Heated	Heated
I14.2.16B.29	916	JM	Silcrete_Reflection_00916	16B	South Africa	6	Ventral	I14	Training	Heated	Heated
I14.2.16B.29	917	JM	Silcrete_Reflection_00917	16B	South Africa	7	Ventral	I14	Training	Heated	Unheated
I14.2.16B.29	918	JM	Silcrete_Reflection_00918	16B	South Africa	8	Ventral	I14	Training	Heated	Heated
I14.2.16B.41	903	JM	Silcrete_Reflection_00903	16B	South Africa	1	Dorsal	I14	Training	Heated	Heated	1
I14.2.16B.41	904	JM	Silcrete_Reflection_00904	16B	South Africa	2	Dorsal	I14	Training	Heated	Heated
I14.2.16B.41	905	JM	Silcrete_Reflection_00905	16B	South Africa	3	Dorsal	I14	Training	Heated	Unheated
I14.2.16B.41	906	JM	Silcrete_Reflection_00906	16B	South Africa	4	Dorsal	I14	Training	Heated	Heated
I14.2.16B.41	907	JM	Silcrete_Reflection_00907	16B	South Africa	5	Ventral	I14	Training	Heated	Heated
I14.2.16B.41	908	JM	Silcrete_Reflection_00908	16B	South Africa	6	Ventral	I14	Training	Heated	Heated
I14.2.16B.41	909	JM	Silcrete_Reflection_00909	16B	South Africa	7	Ventral	I14	Training	Heated	Heated
I14.2.16B.41	910	JM	Silcrete_Reflection_00910	16B	South Africa	8	Ventral	I14	Training	Heated	Heated
I14.2.16B.42	863	JM	Silcrete_Reflection_00863	16B	South Africa	1	Dorsal	I14	Training	Heated	Heated	1
I14.2.16B.42	864	JM	Silcrete_Reflection_00864	16B	South Africa	2	Dorsal	I14	Training	Heated	Heated
I14.2.16B.42	865	JM	Silcrete_Reflection_00865	16B	South Africa	3	Dorsal	I14	Training	Heated	Heated
I14.2.16B.42	866	JM	Silcrete_Reflection_00866	16B	South Africa	4	Dorsal	I14	Training	Heated	Heated
I14.2.16B.42	867	JM	Silcrete_Reflection_00867	16B	South Africa	5	Ventral	I14	Training	Heated	Heated
I14.2.16B.42	868	JM	Silcrete_Reflection_00868	16B	South Africa	6	Ventral	I14	Training	Heated	Heated
I14.2.16B.42	869	JM	Silcrete_Reflection_00869	16B	South Africa	7	Ventral	I14	Training	Heated	Heated
I14.2.16B.42	870	JM	Silcrete_Reflection_00870	16B	South Africa	8	Ventral	I14	Training	Heated	Heated
I14.2.16B.43	177	JM	Silcrete_Reflection_00177	16B	South Africa	1	Dorsal	I14	Training	Heated	Heated	1
I14.2.16B.43	178	JM	Silcrete_Reflection_00178	16B	South Africa	2	Dorsal	I14	Training	Heated	Heated
I14.2.16B.43	179	JM	Silcrete_Reflection_00179	16B	South Africa	3	Dorsal	I14	Training	Heated	Heated
I14.2.16B.43	180	JM	Silcrete_Reflection_00180	16B	South Africa	4	Dorsal	I14	Training	Heated	Heated
I14.2.16B.43	182	JM	Silcrete_Reflection_00182	16B	South Africa	6	Ventral	I14	Training	Heated	Heated
I14.2.16B.43	183	JM	Silcrete_Reflection_00183	16B	South Africa	7	Ventral	I14	Training	Heated	Heated
I14.2.16B.43	184	JM	Silcrete_Reflection_00184	16B	South Africa	8	Ventral	I14	Training	Heated	Unheated
I14.2.16B.49	879	JM	Silcrete_Reflection_00879	16B	South Africa	1	Dorsal	I14	Training	Heated	Unheated	1
I14.2.16B.49	880	JM	Silcrete_Reflection_00880	16B	South Africa	2	Dorsal	I14	Training	Heated	Heated
I14.2.16B.49	881	JM	Silcrete_Reflection_00881	16B	South Africa	3	Dorsal	I14	Training	Heated	Heated
I14.2.16B.49	882	JM	Silcrete_Reflection_00882	16B	South Africa	4	Dorsal	I14	Training	Heated	Heated
I14.2.16B.49	883	JM	Silcrete_Reflection_00883	16B	South Africa	5	Ventral	I14	Training	Heated	Unheated
I14.2.16B.49	884	JM	Silcrete_Reflection_00884	16B	South Africa	6	Ventral	I14	Training	Heated	Heated
I14.2.16B.49	885	JM	Silcrete_Reflection_00885	16B	South Africa	7	Ventral	I14	Training	Heated	Heated
I14.2.16B.49	886	JM	Silcrete_Reflection_00886	16B	South Africa	8	Ventral	I14	Training	Heated	Heated
I14.2.16B.50	193	JM	Silcrete_Reflection_00193	16B	South Africa	1	Dorsal	I14	Training	Heated	Heated	1
I14.2.16B.50	194	JM	Silcrete_Reflection_00194	16B	South Africa	2	Dorsal	I14	Training	Heated	Heated
I14.2.16B.50	195	JM	Silcrete_Reflection_00195	16B	South Africa	3	Dorsal	I14	Training	Heated	Heated
I14.2.16B.50	196	JM	Silcrete_Reflection_00196	16B	South Africa	4	Dorsal	I14	Training	Heated	Heated
I14.2.16B.50	197	JM	Silcrete_Reflection_00197	16B	South Africa	5	Ventral	I14	Training	Heated	Heated
I14.2.16B.50	198	JM	Silcrete_Reflection_00198	16B	South Africa	6	Ventral	I14	Training	Heated	Heated
I14.2.16B.50	199	JM	Silcrete_Reflection_00199	16B	South Africa	7	Ventral	I14	Training	Heated	Unheated
I14.2.16B.50	200	JM	Silcrete_Reflection_00200	16B	South Africa	8	Ventral	I14	Training	Heated	Heated
I14.2.16B.55a	895	JM	Silcrete_Reflection_00895	16B	South Africa	1	Dorsal	I14	Training	Heated	Heated	1
I14.2.16B.55a	896	JM	Silcrete_Reflection_00896	16B	South Africa	2	Dorsal	I14	Training	Heated	Heated
I14.2.16B.55a	897	JM	Silcrete_Reflection_00897	16B	South Africa	3	Dorsal	I14	Training	Heated	Unheated
I14.2.16B.55a	898	JM	Silcrete_Reflection_00898	16B	South Africa	4	Dorsal	I14	Training	Heated	Heated
I14.2.16B.55a	899	JM	Silcrete_Reflection_00899	16B	South Africa	5	Ventral	I14	Training	Heated	Heated
I14.2.16B.55a	900	JM	Silcrete_Reflection_00900	16B	South Africa	6	Ventral	I14	Training	Heated	Heated
I14.2.16B.55a	901	JM	Silcrete_Reflection_00901	16B	South Africa	7	Ventral	I14	Training	Heated	Heated
I14.2.16B.55a	902	JM	Silcrete_Reflection_00902	16B	South Africa	8	Ventral	I14	Training	Heated	Heated
I14.2.16B.59	919	JM	Silcrete_Reflection_00919	16B	South Africa	1	Dorsal	I14	Training	Heated	Heated	1
I14.2.16B.59	920	JM	Silcrete_Reflection_00920	16B	South Africa	2	Dorsal	I14	Training	Heated	Heated
I14.2.16B.59	921	JM	Silcrete_Reflection_00921	16B	South Africa	3	Dorsal	I14	Training	Heated	Heated
I14.2.16B.59	922	JM	Silcrete_Reflection_00922	16B	South Africa	4	Dorsal	I14	Training	Heated	Heated
I14.2.16B.59	923	JM	Silcrete_Reflection_00923	16B	South Africa	5	Ventral	I14	Training	Heated	Heated
I14.2.16B.59	924	JM	Silcrete_Reflection_00924	16B	South Africa	6	Ventral	I14	Training	Heated	Heated
I14.2.16B.59	925	JM	Silcrete_Reflection_00925	16B	South Africa	7	Ventral	I14	Training	Heated	Heated
I14.2.16B.59	926	JM	Silcrete_Reflection_00926	16B	South Africa	8	Ventral	I14	Training	Heated	Heated
I14.2.16B.61	887	JM	Silcrete_Reflection_00887	16B	South Africa	1	Dorsal	I14	Training	Heated	Unheated	1
I14.2.16B.61	888	JM	Silcrete_Reflection_00888	16B	South Africa	2	Dorsal	I14	Training	Heated	Heated
I14.2.16B.61	889	JM	Silcrete_Reflection_00889	16B	South Africa	3	Dorsal	I14	Training	Heated	Heated
I14.2.16B.61	890	JM	Silcrete_Reflection_00890	16B	South Africa	4	Dorsal	I14	Training	Heated	Unheated
I14.2.16B.61	891	JM	Silcrete_Reflection_00891	16B	South Africa	5	Ventral	I14	Training	Heated	Heated
I14.2.16B.61	892	JM	Silcrete_Reflection_00892	16B	South Africa	6	Ventral	I14	Training	Heated	Heated
I14.2.16B.61	893	JM	Silcrete_Reflection_00893	16B	South Africa	7	Ventral	I14	Training	Heated	Heated
I14.2.16B.61	894	JM	Silcrete_Reflection_00894	16B	South Africa	8	Ventral	I14	Training	Heated	Unheated
I14.2.16B.8	153	JM	Silcrete_Reflection_00153	16B	South Africa	1	Dorsal	I14	Training	Heated	Unheated	0
I14.2.16B.8	154	JM	Silcrete_Reflection_00154	16B	South Africa	2	Dorsal	I14	Training	Heated	Heated
I14.2.16B.8	155	JM	Silcrete_Reflection_00155	16B	South Africa	3	Dorsal	I14	Training	Heated	Heated
I14.2.16B.8	156	JM	Silcrete_Reflection_00156	16B	South Africa	4	Dorsal	I14	Training	Heated	Unheated
I14.2.16B.8	157	JM	Silcrete_Reflection_00157	16B	South Africa	5	Ventral	I14	Training	Heated	Unheated
I14.2.16B.8	158	JM	Silcrete_Reflection_00158	16B	South Africa	6	Ventral	I14	Training	Heated	Unheated
I14.2.16B.8	159	JM	Silcrete_Reflection_00159	16B	South Africa	7	Ventral	I14	Training	Heated	Unheated
I14.2.16B.8	160	JM	Silcrete_Reflection_00160	16B	South Africa	8	Ventral	I14	Training	Heated	Unheated
D9.1.12A.11	607	JM	Silcrete_Reflection_00607	12A	South Africa	1	Dorsal	D9	Training	Unheated	Unheated	1
D9.1.12A.11	608	JM	Silcrete_Reflection_00608	12A	South Africa	2	Dorsal	D9	Training	Unheated	Unheated
D9.1.12A.11	609	JM	Silcrete_Reflection_00609	12A	South Africa	3	Dorsal	D9	Training	Unheated	Heated
D9.1.12A.11	610	JM	Silcrete_Reflection_00610	12A	South Africa	4	Dorsal	D9	Training	Unheated	Unheated
D9.1.12A.11	611	JM	Silcrete_Reflection_00611	12A	South Africa	5	Ventral	D9	Training	Unheated	Heated
D9.1.12A.11	612	JM	Silcrete_Reflection_00612	12A	South Africa	6	Ventral	D9	Training	Unheated	Unheated
D9.1.12A.11	613	JM	Silcrete_Reflection_00613	12A	South Africa	7	Ventral	D9	Training	Unheated	Unheated
D9.1.12A.11	614	JM	Silcrete_Reflection_00614	12A	South Africa	8	Ventral	D9	Training	Unheated	Unheated
D9.1.12A.30	623	JM	Silcrete_Reflection_00623	12A	South Africa	1	Dorsal	D9	Training	Unheated	Unheated	1
D9.1.12A.30	624	JM	Silcrete_Reflection_00624	12A	South Africa	2	Dorsal	D9	Training	Unheated	Heated
D9.1.12A.30	625	JM	Silcrete_Reflection_00625	12A	South Africa	3	Dorsal	D9	Training	Unheated	Heated
D9.1.12A.30	626	JM	Silcrete_Reflection_00626	12A	South Africa	4	Dorsal	D9	Training	Unheated	Unheated
D9.1.12A.30	627	JM	Silcrete_Reflection_00627	12A	South Africa	5	Ventral	D9	Training	Unheated	Unheated
D9.1.12A.30	628	JM	Silcrete_Reflection_00628	12A	South Africa	6	Ventral	D9	Training	Unheated	Unheated
D9.1.12A.30	629	JM	Silcrete_Reflection_00629	12A	South Africa	7	Ventral	D9	Training	Unheated	Unheated
D9.1.12A.30	630	JM	Silcrete_Reflection_00630	12A	South Africa	8	Ventral	D9	Training	Unheated	Unheated
D9.1.12A.34	631	JM	Silcrete_Reflection_00631	12A	South Africa	1	Dorsal	D9	Training	Unheated	Unheated	1
D9.1.12A.34	632	JM	Silcrete_Reflection_00632	12A	South Africa	2	Dorsal	D9	Training	Unheated	Unheated
D9.1.12A.34	633	JM	Silcrete_Reflection_00633	12A	South Africa	3	Dorsal	D9	Training	Unheated	Unheated
D9.1.12A.34	634	JM	Silcrete_Reflection_00634	12A	South Africa	4	Dorsal	D9	Training	Unheated	Unheated
D9.1.12A.34	635	JM	Silcrete_Reflection_00635	12A	South Africa	5	Ventral	D9	Training	Unheated	Unheated
D9.1.12A.34	637	JM	Silcrete_Reflection_00637	12A	South Africa	7	Ventral	D9	Training	Unheated	Unheated
D9.1.12A.34	638	JM	Silcrete_Reflection_00638	12A	South Africa	8	Ventral	D9	Training	Unheated	Unheated
D9.1.12A.40	615	JM	Silcrete_Reflection_00615	12A	South Africa	1	Dorsal	D9	Training	Unheated	Unheated	1
D9.1.12A.40	616	JM	Silcrete_Reflection_00616	12A	South Africa	2	Dorsal	D9	Training	Unheated	Unheated
D9.1.12A.40	617	JM	Silcrete_Reflection_00617	12A	South Africa	3	Dorsal	D9	Training	Unheated	Unheated
D9.1.12A.40	618	JM	Silcrete_Reflection_00618	12A	South Africa	4	Dorsal	D9	Training	Unheated	Unheated
D9.1.12A.40	619	JM	Silcrete_Reflection_00619	12A	South Africa	5	Ventral	D9	Training	Unheated	Unheated
D9.1.12A.40	620	JM	Silcrete_Reflection_00620	12A	South Africa	6	Ventral	D9	Training	Unheated	Unheated
D9.1.12A.40	621	JM	Silcrete_Reflection_00621	12A	South Africa	7	Ventral	D9	Training	Unheated	Unheated
D9.1.12A.40	622	JM	Silcrete_Reflection_00622	12A	South Africa	8	Ventral	D9	Training	Unheated	Heated
D9.1.12C.11	281	SK	Silcrete_Reflection_00281	12C	South Africa	1	Dorsal	D9	Training	Unheated	Unheated	1
D9.1.12C.11	282	SK	Silcrete_Reflection_00282	12C	South Africa	2	Dorsal	D9	Training	Unheated	Unheated
D9.1.12C.11	283	SK	Silcrete_Reflection_00283	12C	South Africa	3	Dorsal	D9	Training	Unheated	Unheated
D9.1.12C.11	284	SK	Silcrete_Reflection_00284	12C	South Africa	4	Dorsal	D9	Training	Unheated	Unheated
D9.1.12C.11	285	SK	Silcrete_Reflection_00285	12C	South Africa	5	Ventral	D9	Training	Unheated	Unheated
D9.1.12C.11	286	SK	Silcrete_Reflection_00286	12C	South Africa	6	Ventral	D9	Training	Unheated	Unheated
D9.1.12C.11	287	SK	Silcrete_Reflection_00287	12C	South Africa	7	Ventral	D9	Training	Unheated	Heated
D9.1.12C.11	288	SK	Silcrete_Reflection_00288	12C	South Africa	8	Ventral	D9	Training	Unheated	Unheated
D9.1.12C.30	289	SK	Silcrete_Reflection_00289	12C	South Africa	1	Dorsal	D9	Training	Unheated	Unheated	1
D9.1.12C.30	290	SK	Silcrete_Reflection_00290	12C	South Africa	2	Dorsal	D9	Training	Unheated	Unheated
D9.1.12C.30	291	SK	Silcrete_Reflection_00291	12C	South Africa	3	Dorsal	D9	Training	Unheated	Unheated
D9.1.12C.30	292	SK	Silcrete_Reflection_00292	12C	South Africa	4	Dorsal	D9	Training	Unheated	Unheated
D9.1.12C.30	293	SK	Silcrete_Reflection_00293	12C	South Africa	5	Ventral	D9	Training	Unheated	Unheated
D9.1.12C.30	294	SK	Silcrete_Reflection_00294	12C	South Africa	6	Ventral	D9	Training	Unheated	Unheated
D9.1.12C.30	295	SK	Silcrete_Reflection_00295	12C	South Africa	7	Ventral	D9	Training	Unheated	Unheated
D9.1.12C.30	296	SK	Silcrete_Reflection_00296	12C	South Africa	8	Ventral	D9	Training	Unheated	Unheated
D9.1.12C.6	479	JM	Silcrete_Reflection_00479	12C	South Africa	1	Dorsal	D9	Training	Unheated	Unheated	1
D9.1.12C.6	480	JM	Silcrete_Reflection_00480	12C	South Africa	2	Dorsal	D9	Training	Unheated	Unheated
D9.1.12C.6	481	JM	Silcrete_Reflection_00481	12C	South Africa	3	Dorsal	D9	Training	Unheated	Heated
D9.1.12C.6	482	JM	Silcrete_Reflection_00482	12C	South Africa	4	Dorsal	D9	Training	Unheated	Unheated
D9.1.12C.6	483	JM	Silcrete_Reflection_00483	12C	South Africa	5	Ventral	D9	Training	Unheated	Unheated
D9.1.12C.6	484	JM	Silcrete_Reflection_00484	12C	South Africa	6	Ventral	D9	Training	Unheated	Unheated
D9.1.12C.6	485	JM	Silcrete_Reflection_00485	12C	South Africa	7	Ventral	D9	Training	Unheated	Unheated
D9.1.12C.6	486	JM	Silcrete_Reflection_00486	12C	South Africa	8	Ventral	D9	Training	Unheated	Unheated
D9.1.12C.8	65	SK	Silcrete_Reflection_00065	12C	South Africa	1	Dorsal	D9	Training	Unheated	Heated	1
D9.1.12C.8	66	SK	Silcrete_Reflection_00066	12C	South Africa	2	Dorsal	D9	Training	Unheated	Unheated
D9.1.12C.8	67	SK	Silcrete_Reflection_00067	12C	South Africa	3	Dorsal	D9	Training	Unheated	Unheated
D9.1.12C.8	68	SK	Silcrete_Reflection_00068	12C	South Africa	4	Dorsal	D9	Training	Unheated	Unheated
D9.1.12C.8	69	SK	Silcrete_Reflection_00069	12C	South Africa	5	Ventral	D9	Training	Unheated	Unheated
D9.1.12C.8	70	SK	Silcrete_Reflection_00070	12C	South Africa	6	Ventral	D9	Training	Unheated	Unheated
D9.1.12C.8	71	SK	Silcrete_Reflection_00071	12C	South Africa	7	Ventral	D9	Training	Unheated	Heated
D9.1.12C.8	72	SK	Silcrete_Reflection_00072	12C	South Africa	8	Ventral	D9	Training	Unheated	Unheated
E3.1.1A.08	727	JM	Silcrete_Reflection_00727	1A	South Africa	1	Dorsal	E3	Training	Unheated	Unheated	1
E3.1.1A.08	729	JM	Silcrete_Reflection_00729	1A	South Africa	3	Dorsal	E3	Training	Unheated	Unheated
E3.1.1A.08	730	JM	Silcrete_Reflection_00730	1A	South Africa	4	Dorsal	E3	Training	Unheated	Unheated
E3.1.1A.08	731	JM	Silcrete_Reflection_00731	1A	South Africa	5	Ventral	E3	Training	Unheated	Heated
E3.1.1A.08	732	JM	Silcrete_Reflection_00732	1A	South Africa	6	Ventral	E3	Training	Unheated	Heated
E3.1.1A.08	733	JM	Silcrete_Reflection_00733	1A	South Africa	7	Ventral	E3	Training	Unheated	Unheated
E3.1.1A.08	734	JM	Silcrete_Reflection_00734	1A	South Africa	8	Ventral	E3	Training	Unheated	Unheated
E3.1.1A.46	735	JM	Silcrete_Reflection_00735	1A	South Africa	1	Dorsal	E3	Training	Unheated	Unheated	1
E3.1.1A.46	737	JM	Silcrete_Reflection_00737	1A	South Africa	3	Dorsal	E3	Training	Unheated	Unheated
E3.1.1A.46	738	JM	Silcrete_Reflection_00738	1A	South Africa	4	Dorsal	E3	Training	Unheated	Unheated
E3.1.1A.46	739	JM	Silcrete_Reflection_00739	1A	South Africa	5	Ventral	E3	Training	Unheated	Unheated
E3.1.1A.46	740	JM	Silcrete_Reflection_00740	1A	South Africa	6	Ventral	E3	Training	Unheated	Unheated
E3.1.1A.46	742	JM	Silcrete_Reflection_00742	1A	South Africa	8	Ventral	E3	Training	Unheated	Unheated
E3.1.1A.5	123	SK	Silcrete_Reflection_00213	1A	South Africa	5	Ventral	E3	Training	Unheated	Unheated	1
E3.1.1A.5	209	SK	Silcrete_Reflection_00209	1A	South Africa	1	Dorsal	E3	Training	Unheated	Unheated
E3.1.1A.5	210	SK	Silcrete_Reflection_00210	1A	South Africa	2	Dorsal	E3	Training	Unheated	Unheated
E3.1.1A.5	211	SK	Silcrete_Reflection_00211	1A	South Africa	3	Dorsal	E3	Training	Unheated	Unheated
E3.1.1A.5	212	SK	Silcrete_Reflection_00212	1A	South Africa	4	Dorsal	E3	Training	Unheated	Unheated
E3.1.1A.5	214	SK	Silcrete_Reflection_00214	1A	South Africa	6	Ventral	E3	Training	Unheated	Unheated
E3.1.1A.5	215	SK	Silcrete_Reflection_00215	1A	South Africa	7	Ventral	E3	Training	Unheated	Unheated
E3.1.1A.5	216	SK	Silcrete_Reflection_00216	1A	South Africa	8	Ventral	E3	Training	Unheated	Unheated
E3.1.1A.50	743	JM	Silcrete_Reflection_00743	1A	South Africa	1	Dorsal	E3	Training	Unheated	Unheated	1
E3.1.1A.50	744	JM	Silcrete_Reflection_00744	1A	South Africa	2	Dorsal	E3	Training	Unheated	Unheated
E3.1.1A.50	745	JM	Silcrete_Reflection_00745	1A	South Africa	3	Dorsal	E3	Training	Unheated	Unheated
E3.1.1A.50	746	JM	Silcrete_Reflection_00746	1A	South Africa	4	Dorsal	E3	Training	Unheated	Unheated
E3.1.1A.50	747	JM	Silcrete_Reflection_00747	1A	South Africa	5	Ventral	E3	Training	Unheated	Unheated
E3.1.1A.50	748	JM	Silcrete_Reflection_00748	1A	South Africa	6	Ventral	E3	Training	Unheated	Unheated
E3.1.1A.50	749	JM	Silcrete_Reflection_00749	1A	South Africa	7	Ventral	E3	Training	Unheated	Unheated
E3.1.1A.50	750	JM	Silcrete_Reflection_00750	1A	South Africa	8	Ventral	E3	Training	Unheated	Unheated
E3.1.5N.19	471	ET	Silcrete_Reflection_00471	5N	South Africa	1	Dorsal	E3	Training	Unheated	Unheated	1
E3.1.5N.19	472	ET	Silcrete_Reflection_00472	5N	South Africa	2	Dorsal	E3	Training	Unheated	Unheated
E3.1.5N.19	473	ET	Silcrete_Reflection_00473	5N	South Africa	3	Dorsal	E3	Training	Unheated	Unheated
E3.1.5N.19	474	ET	Silcrete_Reflection_00474	5N	South Africa	4	Dorsal	E3	Training	Unheated	Unheated
E3.1.5N.19	475	ET	Silcrete_Reflection_00475	5N	South Africa	5	Ventral	E3	Training	Unheated	Unheated
E3.1.5N.19	476	ET	Silcrete_Reflection_00476	5N	South Africa	6	Ventral	E3	Training	Unheated	Unheated
E3.1.5N.19	477	ET	Silcrete_Reflection_00477	5N	South Africa	7	Ventral	E3	Training	Unheated	Unheated
E3.1.5N.19	478	ET	Silcrete_Reflection_00478	5N	South Africa	8	Ventral	E3	Training	Unheated	Unheated
E3.1.5N.23	249	ET	Silcrete_Reflection_00249	5N	South Africa	1	Dorsal	E3	Training	Unheated	Unheated	1
E3.1.5N.23	250	ET	Silcrete_Reflection_00250	5N	South Africa	2	Dorsal	E3	Training	Unheated	Heated
E3.1.5N.23	251	ET	Silcrete_Reflection_00251	5N	South Africa	3	Dorsal	E3	Training	Unheated	Unheated
E3.1.5N.23	252	ET	Silcrete_Reflection_00252	5N	South Africa	4	Dorsal	E3	Training	Unheated	Unheated
E3.1.5N.23	253	ET	Silcrete_Reflection_00253	5N	South Africa	5	Ventral	E3	Training	Unheated	Unheated
E3.1.5N.23	254	ET	Silcrete_Reflection_00254	5N	South Africa	6	Ventral	E3	Training	Unheated	Unheated
E3.1.5N.23	255	ET	Silcrete_Reflection_00255	5N	South Africa	7	Ventral	E3	Training	Unheated	Unheated
E3.1.5N.23	256	ET	Silcrete_Reflection_00256	5N	South Africa	8	Ventral	E3	Training	Unheated	Unheated
E3.1.5N.25	391	SK	Silcrete_Reflection_00391	5N	South Africa	1	Dorsal	E3	Training	Unheated	Unheated	1
E3.1.5N.25	392	SK	Silcrete_Reflection_00392	5N	South Africa	2	Dorsal	E3	Training	Unheated	Unheated
E3.1.5N.25	393	SK	Silcrete_Reflection_00393	5N	South Africa	3	Dorsal	E3	Training	Unheated	Heated
E3.1.5N.25	394	SK	Silcrete_Reflection_00394	5N	South Africa	4	Dorsal	E3	Training	Unheated	Unheated
E3.1.5N.25	395	SK	Silcrete_Reflection_00395	5N	South Africa	5	Ventral	E3	Training	Unheated	Unheated
E3.1.5N.25	396	SK	Silcrete_Reflection_00396	5N	South Africa	6	Ventral	E3	Training	Unheated	Unheated
E3.1.5N.25	397	SK	Silcrete_Reflection_00397	5N	South Africa	7	Ventral	E3	Training	Unheated	Unheated
E3.1.5N.25	398	SK	Silcrete_Reflection_00398	5N	South Africa	8	Ventral	E3	Training	Unheated	Unheated
E3.1.5N.43	273	ET	Silcrete_Reflection_00273	5N	South Africa	1	Dorsal	E3	Training	Unheated	Unheated	1
E3.1.5N.43	274	ET	Silcrete_Reflection_00274	5N	South Africa	2	Dorsal	E3	Training	Unheated	Unheated
E3.1.5N.43	275	ET	Silcrete_Reflection_00275	5N	South Africa	3	Dorsal	E3	Training	Unheated	Unheated
E3.1.5N.43	276	ET	Silcrete_Reflection_00276	5N	South Africa	4	Dorsal	E3	Training	Unheated	Unheated
E3.1.5N.43	277	ET	Silcrete_Reflection_00277	5N	South Africa	5	Ventral	E3	Training	Unheated	Unheated
E3.1.5N.43	278	ET	Silcrete_Reflection_00278	5N	South Africa	6	Ventral	E3	Training	Unheated	Heated
E3.1.5N.43	279	ET	Silcrete_Reflection_00279	5N	South Africa	7	Ventral	E3	Training	Unheated	Unheated
E3.1.5N.43	280	ET	Silcrete_Reflection_00280	5N	South Africa	8	Ventral	E3	Training	Unheated	Unheated
E3.1.5N.7	241	JM	Silcrete_Reflection_00241	5N	South Africa	1	Dorsal	E3	Training	Unheated	Unheated	1
E3.1.5N.7	242	JM	Silcrete_Reflection_00242	5N	South Africa	2	Dorsal	E3	Training	Unheated	Heated
E3.1.5N.7	243	JM	Silcrete_Reflection_00243	5N	South Africa	3	Dorsal	E3	Training	Unheated	Unheated
E3.1.5N.7	244	JM	Silcrete_Reflection_00244	5N	South Africa	4	Dorsal	E3	Training	Unheated	Heated
E3.1.5N.7	245	JM	Silcrete_Reflection_00245	5N	South Africa	5	Ventral	E3	Training	Unheated	Heated
E3.1.5N.7	246	JM	Silcrete_Reflection_00246	5N	South Africa	6	Ventral	E3	Training	Unheated	Unheated
E3.1.5N.7	247	JM	Silcrete_Reflection_00247	5N	South Africa	7	Ventral	E3	Training	Unheated	Heated
E3.1.5N.7	248	JM	Silcrete_Reflection_00248	5N	South Africa	8	Ventral	E3	Training	Unheated	Unheated
E3.1.5O.11	345	ET	Silcrete_Reflection_00345	5O	South Africa	1	Dorsal	E3	Training	Unheated	Unheated	1
E3.1.5O.11	346	ET	Silcrete_Reflection_00346	5O	South Africa	2	Dorsal	E3	Training	Unheated	Unheated
E3.1.5O.11	347	ET	Silcrete_Reflection_00347	5O	South Africa	3	Dorsal	E3	Training	Unheated	Unheated
E3.1.5O.11	348	ET	Silcrete_Reflection_00348	5O	South Africa	4	Dorsal	E3	Training	Unheated	Unheated
E3.1.5O.11	349	ET	Silcrete_Reflection_00349	5O	South Africa	5	Ventral	E3	Training	Unheated	Unheated
E3.1.5O.11	350	ET	Silcrete_Reflection_00350	5O	South Africa	6	Ventral	E3	Training	Unheated	Unheated
E3.1.5O.11	351	ET	Silcrete_Reflection_00351	5O	South Africa	7	Ventral	E3	Training	Unheated	Unheated
E3.1.5O.11	352	ET	Silcrete_Reflection_00352	5O	South Africa	8	Ventral	E3	Training	Unheated	Unheated
E3.1.5O.6	353	ET	Silcrete_Reflection_00353	5O	South Africa	1	Dorsal	E3	Training	Unheated	Unheated	1
E3.1.5O.6	354	ET	Silcrete_Reflection_00354	5O	South Africa	2	Dorsal	E3	Training	Unheated	Unheated
E3.1.5O.6	355	ET	Silcrete_Reflection_00355	5O	South Africa	3	Dorsal	E3	Training	Unheated	Unheated
E3.1.5O.6	356	ET	Silcrete_Reflection_00356	5O	South Africa	4	Dorsal	E3	Training	Unheated	Unheated
E3.1.5O.6	357	ET	Silcrete_Reflection_00357	5O	South Africa	5	Ventral	E3	Training	Unheated	Unheated
E3.1.5O.6	358	ET	Silcrete_Reflection_00358	5O	South Africa	6	Ventral	E3	Training	Unheated	Unheated
E3.1.5O.6	359	ET	Silcrete_Reflection_00359	5O	South Africa	7	Ventral	E3	Training	Unheated	Unheated
E3.1.5O.6	360	ET	Silcrete_Reflection_00360	5O	South Africa	8	Ventral	E3	Training	Unheated	Unheated
E3.1.6B.10	423	SK	Silcrete_Reflection_00423	6B	South Africa	1	Dorsal	E3	Training	Unheated	Unheated	1
E3.1.6B.10	424	SK	Silcrete_Reflection_00424	6B	South Africa	2	Dorsal	E3	Training	Unheated	Unheated
E3.1.6B.10	426	SK	Silcrete_Reflection_00426	6B	South Africa	4	Dorsal	E3	Training	Unheated	Unheated
E3.1.6B.10	427	SK	Silcrete_Reflection_00427	6B	South Africa	5	Ventral	E3	Training	Unheated	Unheated
E3.1.6B.10	429	SK	Silcrete_Reflection_00429	6B	South Africa	7	Ventral	E3	Training	Unheated	Unheated
E3.1.6B.10	430	SK	Silcrete_Reflection_00430	6B	South Africa	8	Ventral	E3	Training	Unheated	Unheated
E3.1.6B.19	169	JM	Silcrete_Reflection_00169	6B	South Africa	1	Dorsal	E3	Training	Unheated	Unheated	1
E3.1.6B.19	170	JM	Silcrete_Reflection_00170	6B	South Africa	2	Dorsal	E3	Training	Unheated	Heated
E3.1.6B.19	171	JM	Silcrete_Reflection_00171	6B	South Africa	3	Dorsal	E3	Training	Unheated	Unheated
E3.1.6B.19	172	JM	Silcrete_Reflection_00172	6B	South Africa	4	Dorsal	E3	Training	Unheated	Heated
E3.1.6B.19	173	JM	Silcrete_Reflection_00173	6B	South Africa	5	Ventral	E3	Training	Unheated	Heated
E3.1.6B.19	174	JM	Silcrete_Reflection_00174	6B	South Africa	6	Ventral	E3	Training	Unheated	Unheated
E3.1.6B.19	175	JM	Silcrete_Reflection_00175	6B	South Africa	7	Ventral	E3	Training	Unheated	Unheated
E3.1.6B.19	176	JM	Silcrete_Reflection_00176	6B	South Africa	8	Ventral	E3	Training	Unheated	Unheated
E3.1.6B.2	447	ET	Silcrete_Reflection_00447	6B	South Africa	1	Dorsal	E3	Training	Unheated	Unheated	1
E3.1.6B.2	448	ET	Silcrete_Reflection_00448	6B	South Africa	2	Dorsal	E3	Training	Unheated	Heated
E3.1.6B.2	449	ET	Silcrete_Reflection_00449	6B	South Africa	3	Dorsal	E3	Training	Unheated	Unheated
E3.1.6B.2	450	ET	Silcrete_Reflection_00450	6B	South Africa	4	Dorsal	E3	Training	Unheated	Unheated
E3.1.6B.2	451	ET	Silcrete_Reflection_00451	6B	South Africa	5	Ventral	E3	Training	Unheated	Unheated
E3.1.6B.2	452	ET	Silcrete_Reflection_00452	6B	South Africa	6	Ventral	E3	Training	Unheated	Unheated
E3.1.6B.2	453	ET	Silcrete_Reflection_00453	6B	South Africa	7	Ventral	E3	Training	Unheated	Unheated
E3.1.6B.2	454	ET	Silcrete_Reflection_00454	6B	South Africa	8	Ventral	E3	Training	Unheated	Unheated
E3.1.6B.21	233	SK	Silcrete_Reflection_00233	6B	South Africa	1	Dorsal	E3	Training	Unheated	Unheated	0
E3.1.6B.21	234	SK	Silcrete_Reflection_00234	6B	South Africa	2	Dorsal	E3	Training	Unheated	Heated
E3.1.6B.21	235	SK	Silcrete_Reflection_00235	6B	South Africa	3	Dorsal	E3	Training	Unheated	Heated
E3.1.6B.21	236	SK	Silcrete_Reflection_00236	6B	South Africa	4	Dorsal	E3	Training	Unheated	Unheated
E3.1.6B.21	237	SK	Silcrete_Reflection_00237	6B	South Africa	5	Ventral	E3	Training	Unheated	Heated
E3.1.6B.21	238	SK	Silcrete_Reflection_00238	6B	South Africa	6	Ventral	E3	Training	Unheated	Unheated
E3.1.6B.21	240	SK	Silcrete_Reflection_00240	6B	South Africa	8	Ventral	E3	Training	Unheated	Heated
E3.1.6B.23	456	ET	Silcrete_Reflection_00456	6B	South Africa	2	Dorsal	E3	Training	Unheated	Heated	0
E3.1.6B.23	458	ET	Silcrete_Reflection_00458	6B	South Africa	4	Dorsal	E3	Training	Unheated	Unheated
E3.1.6B.23	459	ET	Silcrete_Reflection_00459	6B	South Africa	5	Ventral	E3	Training	Unheated	Unheated
E3.1.6B.23	460	ET	Silcrete_Reflection_00460	6B	South Africa	6	Ventral	E3	Training	Unheated	Heated
E3.1.6B.23	461	ET	Silcrete_Reflection_00461	6B	South Africa	7	Ventral	E3	Training	Unheated	Unheated
E3.1.6B.23	462	ET	Silcrete_Reflection_00462	6B	South Africa	8	Ventral	E3	Training	Unheated	Heated
I14.2.16A.04	831	JM	Silcrete_Reflection_00831	16A	South Africa	1	Dorsal	I14	Training	Unheated	Unheated	1
I14.2.16A.04	832	JM	Silcrete_Reflection_00832	16A	South Africa	2	Dorsal	I14	Training	Unheated	Unheated
I14.2.16A.04	833	JM	Silcrete_Reflection_00833	16A	South Africa	3	Dorsal	I14	Training	Unheated	Unheated
I14.2.16A.04	834	JM	Silcrete_Reflection_00834	16A	South Africa	4	Dorsal	I14	Training	Unheated	Unheated
I14.2.16A.04	835	JM	Silcrete_Reflection_00835	16A	South Africa	5	Ventral	I14	Training	Unheated	Unheated
I14.2.16A.04	836	JM	Silcrete_Reflection_00836	16A	South Africa	6	Ventral	I14	Training	Unheated	Unheated
I14.2.16A.04	837	JM	Silcrete_Reflection_00837	16A	South Africa	7	Ventral	I14	Training	Unheated	Unheated
I14.2.16A.04	838	JM	Silcrete_Reflection_00838	16A	South Africa	8	Ventral	I14	Training	Unheated	Unheated
I14.2.16A.06	767	JM	Silcrete_Reflection_00767	16A	South Africa	1	Dorsal	I14	Training	Unheated	Heated	1
I14.2.16A.06	768	JM	Silcrete_Reflection_00768	16A	South Africa	2	Dorsal	I14	Training	Unheated	Unheated
I14.2.16A.06	769	JM	Silcrete_Reflection_00769	16A	South Africa	3	Dorsal	I14	Training	Unheated	Unheated
I14.2.16A.06	770	JM	Silcrete_Reflection_00770	16A	South Africa	4	Dorsal	I14	Training	Unheated	Heated
I14.2.16A.06	771	JM	Silcrete_Reflection_00771	16A	South Africa	5	Ventral	I14	Training	Unheated	Unheated
I14.2.16A.06	772	JM	Silcrete_Reflection_00772	16A	South Africa	6	Ventral	I14	Training	Unheated	Unheated
I14.2.16A.06	773	JM	Silcrete_Reflection_00773	16A	South Africa	7	Ventral	I14	Training	Unheated	Unheated
I14.2.16A.06	774	JM	Silcrete_Reflection_00774	16A	South Africa	8	Ventral	I14	Training	Unheated	Unheated
I14.2.16A.07	823	JM	Silcrete_Reflection_00823	16A	South Africa	1	Dorsal	I14	Training	Unheated	Unheated	1
I14.2.16A.07	824	JM	Silcrete_Reflection_00824	16A	South Africa	2	Dorsal	I14	Training	Unheated	Unheated
I14.2.16A.07	825	JM	Silcrete_Reflection_00825	16A	South Africa	3	Dorsal	I14	Training	Unheated	Unheated
I14.2.16A.07	826	JM	Silcrete_Reflection_00826	16A	South Africa	4	Dorsal	I14	Training	Unheated	Unheated
I14.2.16A.07	827	JM	Silcrete_Reflection_00827	16A	South Africa	5	Ventral	I14	Training	Unheated	Unheated
I14.2.16A.07	828	JM	Silcrete_Reflection_00828	16A	South Africa	6	Ventral	I14	Training	Unheated	Unheated
I14.2.16A.07	829	JM	Silcrete_Reflection_00829	16A	South Africa	7	Ventral	I14	Training	Unheated	Unheated
I14.2.16A.07	830	JM	Silcrete_Reflection_00830	16A	South Africa	8	Ventral	I14	Training	Unheated	Unheated
I14.2.16A.17	129	SK	Silcrete_Reflection_00129	16A	South Africa	1	Dorsal	I14	Training	Unheated	Unheated	1
I14.2.16A.17	130	SK	Silcrete_Reflection_00130	16A	South Africa	2	Dorsal	I14	Training	Unheated	Unheated
I14.2.16A.17	131	SK	Silcrete_Reflection_00131	16A	South Africa	3	Dorsal	I14	Training	Unheated	Unheated
I14.2.16A.17	132	SK	Silcrete_Reflection_00132	16A	South Africa	4	Dorsal	I14	Training	Unheated	Unheated
I14.2.16A.17	133	SK	Silcrete_Reflection_00133	16A	South Africa	5	Ventral	I14	Training	Unheated	Unheated
I14.2.16A.17	134	SK	Silcrete_Reflection_00134	16A	South Africa	6	Ventral	I14	Training	Unheated	Unheated
I14.2.16A.17	135	SK	Silcrete_Reflection_00135	16A	South Africa	7	Ventral	I14	Training	Unheated	Unheated
I14.2.16A.17	136	SK	Silcrete_Reflection_00136	16A	South Africa	8	Ventral	I14	Training	Unheated	Unheated
I14.2.16A.18	145	SK	Silcrete_Reflection_00145	16A	South Africa	1	Dorsal	I14	Training	Unheated	Unheated	1
I14.2.16A.18	146	SK	Silcrete_Reflection_00146	16A	South Africa	2	Dorsal	I14	Training	Unheated	Unheated
I14.2.16A.18	147	SK	Silcrete_Reflection_00147	16A	South Africa	3	Dorsal	I14	Training	Unheated	Unheated
I14.2.16A.18	148	SK	Silcrete_Reflection_00148	16A	South Africa	4	Dorsal	I14	Training	Unheated	Unheated
I14.2.16A.18	150	SK	Silcrete_Reflection_00150	16A	South Africa	6	Ventral	I14	Training	Unheated	Unheated
I14.2.16A.18	151	SK	Silcrete_Reflection_00151	16A	South Africa	7	Ventral	I14	Training	Unheated	Unheated
I14.2.16A.20	161	JM	Silcrete_Reflection_00161	16A	South Africa	1	Dorsal	I14	Training	Unheated	Unheated	1
I14.2.16A.20	162	JM	Silcrete_Reflection_00162	16A	South Africa	2	Dorsal	I14	Training	Unheated	Unheated
I14.2.16A.20	163	JM	Silcrete_Reflection_00163	16A	South Africa	3	Dorsal	I14	Training	Unheated	Unheated
I14.2.16A.20	164	JM	Silcrete_Reflection_00164	16A	South Africa	4	Dorsal	I14	Training	Unheated	Heated
I14.2.16A.20	165	JM	Silcrete_Reflection_00165	16A	South Africa	5	Ventral	I14	Training	Unheated	Unheated
I14.2.16A.20	166	JM	Silcrete_Reflection_00166	16A	South Africa	6	Ventral	I14	Training	Unheated	Unheated
I14.2.16A.20	167	JM	Silcrete_Reflection_00167	16A	South Africa	7	Ventral	I14	Training	Unheated	Unheated
I14.2.16A.20	168	JM	Silcrete_Reflection_00168	16A	South Africa	8	Ventral	I14	Training	Unheated	Unheated
I14.2.16A.23	799	JM	Silcrete_Reflection_00799	16A	South Africa	1	Dorsal	I14	Training	Unheated	Unheated	1
I14.2.16A.23	800	JM	Silcrete_Reflection_00800	16A	South Africa	2	Dorsal	I14	Training	Unheated	Unheated
I14.2.16A.23	801	JM	Silcrete_Reflection_00801	16A	South Africa	3	Dorsal	I14	Training	Unheated	Heated
I14.2.16A.23	802	JM	Silcrete_Reflection_00802	16A	South Africa	4	Dorsal	I14	Training	Unheated	Unheated
I14.2.16A.23	803	JM	Silcrete_Reflection_00803	16A	South Africa	5	Ventral	I14	Training	Unheated	Unheated
I14.2.16A.23	804	JM	Silcrete_Reflection_00804	16A	South Africa	6	Ventral	I14	Training	Unheated	Unheated
I14.2.16A.23	805	JM	Silcrete_Reflection_00805	16A	South Africa	7	Ventral	I14	Training	Unheated	Unheated
I14.2.16A.23	806	JM	Silcrete_Reflection_00806	16A	South Africa	8	Ventral	I14	Training	Unheated	Unheated
I14.2.16A.24	185	JM	Silcrete_Reflection_00185	16A	South Africa	1	Dorsal	I14	Training	Unheated	Unheated	1
I14.2.16A.24	186	JM	Silcrete_Reflection_00186	16A	South Africa	2	Dorsal	I14	Training	Unheated	Unheated
I14.2.16A.24	187	JM	Silcrete_Reflection_00187	16A	South Africa	3	Dorsal	I14	Training	Unheated	Unheated
I14.2.16A.24	188	JM	Silcrete_Reflection_00188	16A	South Africa	4	Dorsal	I14	Training	Unheated	Unheated
I14.2.16A.24	189	JM	Silcrete_Reflection_00189	16A	South Africa	5	Ventral	I14	Training	Unheated	Unheated
I14.2.16A.24	190	JM	Silcrete_Reflection_00190	16A	South Africa	6	Ventral	I14	Training	Unheated	Unheated
I14.2.16A.24	192	JM	Silcrete_Reflection_00192	16A	South Africa	8	Ventral	I14	Training	Unheated	Unheated
I14.2.16A.28	783	JM	Silcrete_Reflection_00783	16A	South Africa	1	Dorsal	I14	Training	Unheated	Unheated	1
I14.2.16A.28	784	JM	Silcrete_Reflection_00784	16A	South Africa	2	Dorsal	I14	Training	Unheated	Unheated
I14.2.16A.28	785	JM	Silcrete_Reflection_00785	16A	South Africa	3	Dorsal	I14	Training	Unheated	Unheated
I14.2.16A.28	786	JM	Silcrete_Reflection_00786	16A	South Africa	4	Dorsal	I14	Training	Unheated	Unheated
I14.2.16A.28	787	JM	Silcrete_Reflection_00787	16A	South Africa	5	Ventral	I14	Training	Unheated	Unheated
I14.2.16A.28	788	JM	Silcrete_Reflection_00788	16A	South Africa	6	Ventral	I14	Training	Unheated	Unheated
I14.2.16A.28	789	JM	Silcrete_Reflection_00789	16A	South Africa	7	Ventral	I14	Training	Unheated	Unheated
I14.2.16A.28	790	JM	Silcrete_Reflection_00790	16A	South Africa	8	Ventral	I14	Training	Unheated	Unheated
I14.2.16A.35	815	JM	Silcrete_Reflection_00815	16A	South Africa	1	Dorsal	I14	Training	Unheated	Unheated	1
I14.2.16A.35	816	JM	Silcrete_Reflection_00816	16A	South Africa	2	Dorsal	I14	Training	Unheated	Unheated
I14.2.16A.35	817	JM	Silcrete_Reflection_00817	16A	South Africa	3	Dorsal	I14	Training	Unheated	Heated
I14.2.16A.35	818	JM	Silcrete_Reflection_00818	16A	South Africa	4	Dorsal	I14	Training	Unheated	Unheated
I14.2.16A.35	819	JM	Silcrete_Reflection_00819	16A	South Africa	5	Ventral	I14	Training	Unheated	Unheated
I14.2.16A.35	820	JM	Silcrete_Reflection_00820	16A	South Africa	6	Ventral	I14	Training	Unheated	Unheated
I14.2.16A.35	821	JM	Silcrete_Reflection_00821	16A	South Africa	7	Ventral	I14	Training	Unheated	Unheated
I14.2.16A.35	822	JM	Silcrete_Reflection_00822	16A	South Africa	8	Ventral	I14	Training	Unheated	Unheated
I14.2.16A.37	807	JM	Silcrete_Reflection_00807	16A	South Africa	1	Dorsal	I14	Training	Unheated	Unheated	1
I14.2.16A.37	808	JM	Silcrete_Reflection_00808	16A	South Africa	2	Dorsal	I14	Training	Unheated	Unheated
I14.2.16A.37	809	JM	Silcrete_Reflection_00809	16A	South Africa	3	Dorsal	I14	Training	Unheated	Unheated
I14.2.16A.37	810	JM	Silcrete_Reflection_00810	16A	South Africa	4	Dorsal	I14	Training	Unheated	Unheated
I14.2.16A.37	811	JM	Silcrete_Reflection_00811	16A	South Africa	5	Ventral	I14	Training	Unheated	Unheated
I14.2.16A.37	812	JM	Silcrete_Reflection_00812	16A	South Africa	6	Ventral	I14	Training	Unheated	Unheated
I14.2.16A.37	813	JM	Silcrete_Reflection_00813	16A	South Africa	7	Ventral	I14	Training	Unheated	Heated
I14.2.16A.37	814	JM	Silcrete_Reflection_00814	16A	South Africa	8	Ventral	I14	Training	Unheated	Unheated
I14.2.16A.9	201	JM	Silcrete_Reflection_00201	16A	South Africa	1	Dorsal	I14	Training	Unheated	Unheated	1
I14.2.16A.9	202	JM	Silcrete_Reflection_00202	16A	South Africa	2	Dorsal	I14	Training	Unheated	Unheated
I14.2.16A.9	203	JM	Silcrete_Reflection_00203	16A	South Africa	3	Dorsal	I14	Training	Unheated	Unheated
I14.2.16A.9	204	JM	Silcrete_Reflection_00204	16A	South Africa	4	Dorsal	I14	Training	Unheated	Unheated
I14.2.16A.9	205	JM	Silcrete_Reflection_00205	16A	South Africa	5	Ventral	I14	Training	Unheated	Unheated
I14.2.16A.9	206	JM	Silcrete_Reflection_00206	16A	South Africa	6	Ventral	I14	Training	Unheated	Unheated
I14.2.16A.9	207	JM	Silcrete_Reflection_00207	16A	South Africa	7	Ventral	I14	Training	Unheated	Unheated
I14.2.16A.9	208	JM	Silcrete_Reflection_00208	16A	South Africa	8	Ventral	I14	Training	Unheated	Unheated

## Sheet: Model D Predictions by Specimen
Specimen Number	ID	Analyst	Processed Spectrum	Nodule	Region	Scan	Side	Source	Model D Row role	Treatment	Model D_k=3 Predictions	Correct specimen prediction = 1
D9.1.10B.39	9	SK	Silcrete_Reflection_00009	10B	South Africa	1	Dorsal	D9	Test	Heated	Heated	1		# of specimens in the Test set: 11
D9.1.10B.39	10	SK	Silcrete_Reflection_00010	10B	South Africa	2	Dorsal	D9	Test	Heated	Heated			# of specimens with correct prediction, predicted treatment assigned is based on simple majority of associated observations: 11
D9.1.10B.39	11	SK	Silcrete_Reflection_00011	10B	South Africa	3	Dorsal	D9	Test	Heated	Heated			# specimens with incorrect prediction: 0
D9.1.10B.39	12	SK	Silcrete_Reflection_00012	10B	South Africa	4	Dorsal	D9	Test	Heated	Heated			# specimens with a tie, unable to assign treatment: 0
D9.1.10B.39	13	SK	Silcrete_Reflection_00013	10B	South Africa	5	Ventral	D9	Test	Heated	Heated			# of specimens with inconsistent predictions from associated observations: 3
D9.1.10B.39	14	SK	Silcrete_Reflection_00014	10B	South Africa	6	Ventral	D9	Test	Heated	Heated
D9.1.10B.39	15	SK	Silcrete_Reflection_00015	10B	South Africa	7	Ventral	D9	Test	Heated	Heated
D9.1.10B.39	16	SK	Silcrete_Reflection_00016	10B	South Africa	8	Ventral	D9	Test	Heated	Heated
E3.1.1B.24	432	SK	Silcrete_Reflection_00432	1B	South Africa	2	Dorsal	E3	Test	Heated	Heated	1
E3.1.1B.24	433	SK	Silcrete_Reflection_00433	1B	South Africa	3	Dorsal	E3	Test	Heated	Heated
E3.1.1B.24	434	SK	Silcrete_Reflection_00434	1B	South Africa	4	Dorsal	E3	Test	Heated	Heated
E3.1.1B.24	435	SK	Silcrete_Reflection_00435	1B	South Africa	5	Ventral	E3	Test	Heated	Heated
E3.1.1B.24	436	SK	Silcrete_Reflection_00436	1B	South Africa	6	Ventral	E3	Test	Heated	Heated
E3.1.1B.24	437	SK	Silcrete_Reflection_00437	1B	South Africa	7	Ventral	E3	Test	Heated	Heated
E3.1.1B.24	438	SK	Silcrete_Reflection_00438	1B	South Africa	8	Ventral	E3	Test	Heated	Heated
E3.1.1B.27	113	SK	Silcrete_Reflection_00113	1b	South Africa	1	Dorsal	E3	Test	Heated	Heated	1
E3.1.1B.27	114	SK	Silcrete_Reflection_00114	1b	South Africa	2	Dorsal	E3	Test	Heated	Heated
E3.1.1B.27	115	SK	Silcrete_Reflection_00115	1b	South Africa	3	Dorsal	E3	Test	Heated	Heated
E3.1.1B.27	116	SK	Silcrete_Reflection_00116	1b	South Africa	4	Dorsal	E3	Test	Heated	Heated
E3.1.1B.27	117	SK	Silcrete_Reflection_00117	1b	South Africa	5	Ventral	E3	Test	Heated	Heated
E3.1.1B.27	118	SK	Silcrete_Reflection_00118	1b	South Africa	6	Ventral	E3	Test	Heated	Heated
E3.1.1B.27	119	SK	Silcrete_Reflection_00119	1b	South Africa	7	Ventral	E3	Test	Heated	Heated
E3.1.1B.27	120	SK	Silcrete_Reflection_00120	1b	South Africa	8	Ventral	E3	Test	Heated	Heated
I14.2.16B.15	855	JM	Silcrete_Reflection_00855	16B	South Africa	1	Dorsal	I14	Test	Heated	Unheated	1
I14.2.16B.15	856	JM	Silcrete_Reflection_00856	16B	South Africa	2	Dorsal	I14	Test	Heated	Heated
I14.2.16B.15	857	JM	Silcrete_Reflection_00857	16B	South Africa	3	Dorsal	I14	Test	Heated	Heated
I14.2.16B.15	858	JM	Silcrete_Reflection_00858	16B	South Africa	4	Dorsal	I14	Test	Heated	Heated
I14.2.16B.15	859	JM	Silcrete_Reflection_00859	16B	South Africa	5	Ventral	I14	Test	Heated	Heated
I14.2.16B.15	860	JM	Silcrete_Reflection_00860	16B	South Africa	6	Ventral	I14	Test	Heated	Heated
I14.2.16B.15	861	JM	Silcrete_Reflection_00861	16B	South Africa	7	Ventral	I14	Test	Heated	Unheated
I14.2.16B.15	862	JM	Silcrete_Reflection_00862	16B	South Africa	8	Ventral	I14	Test	Heated	Unheated
D9.1.12A.30	623	JM	Silcrete_Reflection_00623	12A	South Africa	1	Dorsal	D9	Test	Unheated	Unheated	1
D9.1.12A.30	624	JM	Silcrete_Reflection_00624	12A	South Africa	2	Dorsal	D9	Test	Unheated	Heated
D9.1.12A.30	625	JM	Silcrete_Reflection_00625	12A	South Africa	3	Dorsal	D9	Test	Unheated	Heated
D9.1.12A.30	626	JM	Silcrete_Reflection_00626	12A	South Africa	4	Dorsal	D9	Test	Unheated	Unheated
D9.1.12A.30	627	JM	Silcrete_Reflection_00627	12A	South Africa	5	Ventral	D9	Test	Unheated	Unheated
D9.1.12A.30	628	JM	Silcrete_Reflection_00628	12A	South Africa	6	Ventral	D9	Test	Unheated	Unheated
D9.1.12A.30	629	JM	Silcrete_Reflection_00629	12A	South Africa	7	Ventral	D9	Test	Unheated	Unheated
D9.1.12A.30	630	JM	Silcrete_Reflection_00630	12A	South Africa	8	Ventral	D9	Test	Unheated	Unheated
D9.1.12A.34	631	JM	Silcrete_Reflection_00631	12A	South Africa	1	Dorsal	D9	Test	Unheated	Unheated	1
D9.1.12A.34	632	JM	Silcrete_Reflection_00632	12A	South Africa	2	Dorsal	D9	Test	Unheated	Unheated
D9.1.12A.34	633	JM	Silcrete_Reflection_00633	12A	South Africa	3	Dorsal	D9	Test	Unheated	Unheated
D9.1.12A.34	634	JM	Silcrete_Reflection_00634	12A	South Africa	4	Dorsal	D9	Test	Unheated	Unheated
D9.1.12A.34	635	JM	Silcrete_Reflection_00635	12A	South Africa	5	Ventral	D9	Test	Unheated	Unheated
D9.1.12A.34	637	JM	Silcrete_Reflection_00637	12A	South Africa	7	Ventral	D9	Test	Unheated	Unheated
D9.1.12A.34	638	JM	Silcrete_Reflection_00638	12A	South Africa	8	Ventral	D9	Test	Unheated	Unheated
E3.1.5N.19	471	ET	Silcrete_Reflection_00471	5N	South Africa	1	Dorsal	E3	Test	Unheated	Unheated	1
E3.1.5N.19	472	ET	Silcrete_Reflection_00472	5N	South Africa	2	Dorsal	E3	Test	Unheated	Unheated
E3.1.5N.19	473	ET	Silcrete_Reflection_00473	5N	South Africa	3	Dorsal	E3	Test	Unheated	Unheated
E3.1.5N.19	474	ET	Silcrete_Reflection_00474	5N	South Africa	4	Dorsal	E3	Test	Unheated	Unheated
E3.1.5N.19	475	ET	Silcrete_Reflection_00475	5N	South Africa	5	Ventral	E3	Test	Unheated	Unheated
E3.1.5N.19	476	ET	Silcrete_Reflection_00476	5N	South Africa	6	Ventral	E3	Test	Unheated	Unheated
E3.1.5N.19	477	ET	Silcrete_Reflection_00477	5N	South Africa	7	Ventral	E3	Test	Unheated	Unheated
E3.1.5N.19	478	ET	Silcrete_Reflection_00478	5N	South Africa	8	Ventral	E3	Test	Unheated	Unheated
E3.1.5N.23	249	ET	Silcrete_Reflection_00249	5N	South Africa	1	Dorsal	E3	Test	Unheated	Unheated
E3.1.5N.23	250	ET	Silcrete_Reflection_00250	5N	South Africa	2	Dorsal	E3	Test	Unheated	Heated	1
E3.1.5N.23	251	ET	Silcrete_Reflection_00251	5N	South Africa	3	Dorsal	E3	Test	Unheated	Unheated
E3.1.5N.23	252	ET	Silcrete_Reflection_00252	5N	South Africa	4	Dorsal	E3	Test	Unheated	Unheated
E3.1.5N.23	253	ET	Silcrete_Reflection_00253	5N	South Africa	5	Ventral	E3	Test	Unheated	Unheated
E3.1.5N.23	254	ET	Silcrete_Reflection_00254	5N	South Africa	6	Ventral	E3	Test	Unheated	Unheated
E3.1.5N.23	255	ET	Silcrete_Reflection_00255	5N	South Africa	7	Ventral	E3	Test	Unheated	Unheated
E3.1.5N.23	256	ET	Silcrete_Reflection_00256	5N	South Africa	8	Ventral	E3	Test	Unheated	Unheated
I14.2.16A.04	831	JM	Silcrete_Reflection_00831	16A	South Africa	1	Dorsal	I14	Test	Unheated	Unheated	1
I14.2.16A.04	832	JM	Silcrete_Reflection_00832	16A	South Africa	2	Dorsal	I14	Test	Unheated	Unheated
I14.2.16A.04	833	JM	Silcrete_Reflection_00833	16A	South Africa	3	Dorsal	I14	Test	Unheated	Unheated
I14.2.16A.04	834	JM	Silcrete_Reflection_00834	16A	South Africa	4	Dorsal	I14	Test	Unheated	Unheated
I14.2.16A.04	835	JM	Silcrete_Reflection_00835	16A	South Africa	5	Ventral	I14	Test	Unheated	Unheated
I14.2.16A.04	836	JM	Silcrete_Reflection_00836	16A	South Africa	6	Ventral	I14	Test	Unheated	Unheated
I14.2.16A.04	837	JM	Silcrete_Reflection_00837	16A	South Africa	7	Ventral	I14	Test	Unheated	Unheated
I14.2.16A.04	838	JM	Silcrete_Reflection_00838	16A	South Africa	8	Ventral	I14	Test	Unheated	Unheated
I14.2.16A.18	145	SK	Silcrete_Reflection_00145	16A	South Africa	1	Dorsal	I14	Test	Unheated	Unheated	1
I14.2.16A.18	146	SK	Silcrete_Reflection_00146	16A	South Africa	2	Dorsal	I14	Test	Unheated	Unheated
I14.2.16A.18	147	SK	Silcrete_Reflection_00147	16A	South Africa	3	Dorsal	I14	Test	Unheated	Unheated
I14.2.16A.18	148	SK	Silcrete_Reflection_00148	16A	South Africa	4	Dorsal	I14	Test	Unheated	Unheated
I14.2.16A.18	150	SK	Silcrete_Reflection_00150	16A	South Africa	6	Ventral	I14	Test	Unheated	Unheated
I14.2.16A.18	151	SK	Silcrete_Reflection_00151	16A	South Africa	7	Ventral	I14	Test	Unheated	Unheated
I14.2.16A.28	783	JM	Silcrete_Reflection_00783	16A	South Africa	1	Dorsal	I14	Test	Unheated	Unheated	1
I14.2.16A.28	784	JM	Silcrete_Reflection_00784	16A	South Africa	2	Dorsal	I14	Test	Unheated	Unheated
I14.2.16A.28	785	JM	Silcrete_Reflection_00785	16A	South Africa	3	Dorsal	I14	Test	Unheated	Unheated
I14.2.16A.28	786	JM	Silcrete_Reflection_00786	16A	South Africa	4	Dorsal	I14	Test	Unheated	Unheated
I14.2.16A.28	787	JM	Silcrete_Reflection_00787	16A	South Africa	5	Ventral	I14	Test	Unheated	Unheated
I14.2.16A.28	788	JM	Silcrete_Reflection_00788	16A	South Africa	6	Ventral	I14	Test	Unheated	Unheated
I14.2.16A.28	789	JM	Silcrete_Reflection_00789	16A	South Africa	7	Ventral	I14	Test	Unheated	Unheated
I14.2.16A.28	790	JM	Silcrete_Reflection_00790	16A	South Africa	8	Ventral	I14	Test	Unheated	Unheated
D9.1.12B.25	41	SK	Silcrete_Reflection_00041	12B	South Africa	1	Dorsal	D9	Validation	Heated	Heated	1		# of specimens in the Validation set: 10
D9.1.12B.25	44	SK	Silcrete_Reflection_00044	12B	South Africa	4	Dorsal	D9	Validation	Heated	Unheated			# of specimens with correct prediction, predicted treatment assigned is based on simple majority of associated observations: 9
D9.1.12B.25	46	SK	Silcrete_Reflection_00046	12B	South Africa	6	Ventral	D9	Validation	Heated	Heated			# specimens with incorrect prediction: 0
D9.1.12B.25	47	SK	Silcrete_Reflection_00047	12B	South Africa	7	Ventral	D9	Validation	Heated	Heated			# specimens with a tie, unable to assign treatment: 1
D9.1.12B.25	48	SK	Silcrete_Reflection_00048	12B	South Africa	8	Ventral	D9	Validation	Heated	Heated			# of specimens with inconsistent predictions from associated observations: 6
E3.1.5P.14	407	SK	Silcrete_Reflection_00407	5P	South Africa	1	Dorsal	E3	Validation	Heated	Heated	1
E3.1.5P.14	408	SK	Silcrete_Reflection_00408	5P	South Africa	2	Dorsal	E3	Validation	Heated	Heated
E3.1.5P.14	409	SK	Silcrete_Reflection_00409	5P	South Africa	3	Dorsal	E3	Validation	Heated	Heated
E3.1.5P.14	410	SK	Silcrete_Reflection_00410	5P	South Africa	4	Dorsal	E3	Validation	Heated	Heated
E3.1.5P.14	411	SK	Silcrete_Reflection_00411	5P	South Africa	5	Ventral	E3	Validation	Heated	Heated
E3.1.5P.14	412	SK	Silcrete_Reflection_00412	5P	South Africa	6	Ventral	E3	Validation	Heated	Heated
E3.1.5P.14	413	SK	Silcrete_Reflection_00413	5P	South Africa	7	Ventral	E3	Validation	Heated	Heated
E3.1.5P.14	414	SK	Silcrete_Reflection_00414	5P	South Africa	8	Ventral	E3	Validation	Heated	Heated
E3.1.5P.23	383	SK	Silcrete_Reflection_00383	5P	South Africa	1	Dorsal	E3	Validation	Heated	Heated	1
E3.1.5P.23	384	SK	Silcrete_Reflection_00384	5P	South Africa	2	Dorsal	E3	Validation	Heated	Heated
E3.1.5P.23	385	SK	Silcrete_Reflection_00385	5P	South Africa	3	Dorsal	E3	Validation	Heated	Heated
E3.1.5P.23	386	SK	Silcrete_Reflection_00386	5P	South Africa	4	Dorsal	E3	Validation	Heated	Heated
E3.1.5P.23	387	SK	Silcrete_Reflection_00387	5P	South Africa	5	Ventral	E3	Validation	Heated	Heated
E3.1.5P.23	388	SK	Silcrete_Reflection_00388	5P	South Africa	6	Ventral	E3	Validation	Heated	Unheated
E3.1.5P.23	389	SK	Silcrete_Reflection_00389	5P	South Africa	7	Ventral	E3	Validation	Heated	Heated
E3.1.5P.23	390	SK	Silcrete_Reflection_00390	5P	South Africa	8	Ventral	E3	Validation	Heated	Heated
E3.1.6A.38	719	JM	Silcrete_Reflection_00719	6A	South Africa	1	Dorsal	E3	Validation	Heated	Heated	1
E3.1.6A.38	720	JM	Silcrete_Reflection_00720	6A	South Africa	2	Dorsal	E3	Validation	Heated	Heated
E3.1.6A.38	721	JM	Silcrete_Reflection_00721	6A	South Africa	3	Dorsal	E3	Validation	Heated	Heated
E3.1.6A.38	722	JM	Silcrete_Reflection_00722	6A	South Africa	4	Dorsal	E3	Validation	Heated	Heated
E3.1.6A.38	723	JM	Silcrete_Reflection_00723	6A	South Africa	5	Ventral	E3	Validation	Heated	Heated
E3.1.6A.38	724	JM	Silcrete_Reflection_00724	6A	South Africa	6	Ventral	E3	Validation	Heated	Heated
E3.1.6A.38	725	JM	Silcrete_Reflection_00725	6A	South Africa	7	Ventral	E3	Validation	Heated	Heated
E3.1.6A.38	726	JM	Silcrete_Reflection_00726	6A	South Africa	8	Ventral	E3	Validation	Heated	Heated
I14.2.16B.47	871	JM	Silcrete_Reflection_00871	16B	South Africa	1	Dorsal	I14	Validation	Heated	Heated	0
I14.2.16B.47	872	JM	Silcrete_Reflection_00872	16B	South Africa	2	Dorsal	I14	Validation	Heated	Unheated
I14.2.16B.47	873	JM	Silcrete_Reflection_00873	16B	South Africa	3	Dorsal	I14	Validation	Heated	Unheated
I14.2.16B.47	874	JM	Silcrete_Reflection_00874	16B	South Africa	4	Dorsal	I14	Validation	Heated	Unheated
I14.2.16B.47	875	JM	Silcrete_Reflection_00875	16B	South Africa	5	Ventral	I14	Validation	Heated	Heated
I14.2.16B.47	876	JM	Silcrete_Reflection_00876	16B	South Africa	6	Ventral	I14	Validation	Heated	Heated
I14.2.16B.47	877	JM	Silcrete_Reflection_00877	16B	South Africa	7	Ventral	I14	Validation	Heated	Heated
I14.2.16B.47	878	JM	Silcrete_Reflection_00878	16B	South Africa	8	Ventral	I14	Validation	Heated	Unheated
I14.2.16B.49	879	JM	Silcrete_Reflection_00879	16B	South Africa	1	Dorsal	I14	Validation	Heated	Unheated	1
I14.2.16B.49	880	JM	Silcrete_Reflection_00880	16B	South Africa	2	Dorsal	I14	Validation	Heated	Heated
I14.2.16B.49	881	JM	Silcrete_Reflection_00881	16B	South Africa	3	Dorsal	I14	Validation	Heated	Heated
I14.2.16B.49	882	JM	Silcrete_Reflection_00882	16B	South Africa	4	Dorsal	I14	Validation	Heated	Heated
I14.2.16B.49	883	JM	Silcrete_Reflection_00883	16B	South Africa	5	Ventral	I14	Validation	Heated	Unheated
I14.2.16B.49	884	JM	Silcrete_Reflection_00884	16B	South Africa	6	Ventral	I14	Validation	Heated	Heated
I14.2.16B.49	885	JM	Silcrete_Reflection_00885	16B	South Africa	7	Ventral	I14	Validation	Heated	Heated
I14.2.16B.49	886	JM	Silcrete_Reflection_00886	16B	South Africa	8	Ventral	I14	Validation	Heated	Heated
I14.2.16B.50	193	JM	Silcrete_Reflection_00193	16B	South Africa	1	Dorsal	I14	Validation	Heated	Heated	1
I14.2.16B.50	194	JM	Silcrete_Reflection_00194	16B	South Africa	2	Dorsal	I14	Validation	Heated	Unheated
I14.2.16B.50	195	JM	Silcrete_Reflection_00195	16B	South Africa	3	Dorsal	I14	Validation	Heated	Heated
I14.2.16B.50	196	JM	Silcrete_Reflection_00196	16B	South Africa	4	Dorsal	I14	Validation	Heated	Heated
I14.2.16B.50	197	JM	Silcrete_Reflection_00197	16B	South Africa	5	Ventral	I14	Validation	Heated	Heated
I14.2.16B.50	198	JM	Silcrete_Reflection_00198	16B	South Africa	6	Ventral	I14	Validation	Heated	Heated
I14.2.16B.50	199	JM	Silcrete_Reflection_00199	16B	South Africa	7	Ventral	I14	Validation	Heated	Unheated
I14.2.16B.50	200	JM	Silcrete_Reflection_00200	16B	South Africa	8	Ventral	I14	Validation	Heated	Heated
D9.1.10A.16	50	SK	Silcrete_Reflection_00050	10A	South Africa	2	Dorsal	D9	Validation	Unheated	Unheated	1
D9.1.10A.16	51	SK	Silcrete_Reflection_00051	10A	South Africa	3	Dorsal	D9	Validation	Unheated	Unheated
D9.1.10A.16	52	SK	Silcrete_Reflection_00052	10A	South Africa	4	Dorsal	D9	Validation	Unheated	Unheated
D9.1.10A.16	54	SK	Silcrete_Reflection_00054	10A	South Africa	6	Ventral	D9	Validation	Unheated	Unheated
D9.1.10A.16	55	SK	Silcrete_Reflection_00055	10A	South Africa	7	Ventral	D9	Validation	Unheated	Unheated
D9.1.10A.16	56	SK	Silcrete_Reflection_00056	10A	South Africa	8	Ventral	D9	Validation	Unheated	Unheated
D9.1.12A.11	607	JM	Silcrete_Reflection_00607	12A	South Africa	1	Dorsal	D9	Validation	Unheated	Unheated	1
D9.1.12A.11	608	JM	Silcrete_Reflection_00608	12A	South Africa	2	Dorsal	D9	Validation	Unheated	Unheated
D9.1.12A.11	609	JM	Silcrete_Reflection_00609	12A	South Africa	3	Dorsal	D9	Validation	Unheated	Heated
D9.1.12A.11	610	JM	Silcrete_Reflection_00610	12A	South Africa	4	Dorsal	D9	Validation	Unheated	Unheated
D9.1.12A.11	611	JM	Silcrete_Reflection_00611	12A	South Africa	5	Ventral	D9	Validation	Unheated	Heated
D9.1.12A.11	612	JM	Silcrete_Reflection_00612	12A	South Africa	6	Ventral	D9	Validation	Unheated	Unheated
D9.1.12A.11	613	JM	Silcrete_Reflection_00613	12A	South Africa	7	Ventral	D9	Validation	Unheated	Unheated
D9.1.12A.11	614	JM	Silcrete_Reflection_00614	12A	South Africa	8	Ventral	D9	Validation	Unheated	Unheated
E3.1.5N.43	273	ET	Silcrete_Reflection_00273	5N	South Africa	1	Dorsal	E3	Validation	Unheated	Unheated	1
E3.1.5N.43	274	ET	Silcrete_Reflection_00274	5N	South Africa	2	Dorsal	E3	Validation	Unheated	Unheated
E3.1.5N.43	275	ET	Silcrete_Reflection_00275	5N	South Africa	3	Dorsal	E3	Validation	Unheated	Unheated
E3.1.5N.43	276	ET	Silcrete_Reflection_00276	5N	South Africa	4	Dorsal	E3	Validation	Unheated	Unheated
E3.1.5N.43	277	ET	Silcrete_Reflection_00277	5N	South Africa	5	Ventral	E3	Validation	Unheated	Unheated
E3.1.5N.43	278	ET	Silcrete_Reflection_00278	5N	South Africa	6	Ventral	E3	Validation	Unheated	Unheated
E3.1.5N.43	279	ET	Silcrete_Reflection_00279	5N	South Africa	7	Ventral	E3	Validation	Unheated	Unheated
E3.1.5N.43	280	ET	Silcrete_Reflection_00280	5N	South Africa	8	Ventral	E3	Validation	Unheated	Unheated
D9.1.10B.18	375	SK	Silcrete_Reflection_00375	10B	South Africa	1	Dorsal	D9	Training	Heated	Heated	1		# of specimens in the Training set: 73
D9.1.10B.18	376	SK	Silcrete_Reflection_00376	10B	South Africa	2	Dorsal	D9	Training	Heated	Heated			# of specimens with correct prediction, predicted treatment assigned is based on simple majority of associated observations: 68
D9.1.10B.18	377	SK	Silcrete_Reflection_00377	10B	South Africa	3	Dorsal	D9	Training	Heated	Heated			# specimens with incorrect prediction: 3
D9.1.10B.18	378	SK	Silcrete_Reflection_00378	10B	South Africa	4	Dorsal	D9	Training	Heated	Heated			# specimens with a tie, unable to assign treatment: 2
D9.1.10B.18	379	SK	Silcrete_Reflection_00379	10B	South Africa	5	Ventral	D9	Training	Heated	Heated			# of specimens with inconsistent predictions from associated observations: 36
D9.1.10B.18	380	SK	Silcrete_Reflection_00380	10B	South Africa	6	Ventral	D9	Training	Heated	Heated
D9.1.10B.18	381	SK	Silcrete_Reflection_00381	10B	South Africa	7	Ventral	D9	Training	Heated	Heated
D9.1.10B.31	1	SK	Silcrete_Reflection_00001	10B	South Africa	1	Dorsal	D9	Training	Heated	Heated	1
D9.1.10B.31	3	SK	Silcrete_Reflection_00003	10B	South Africa	3	Dorsal	D9	Training	Heated	Heated
D9.1.10B.31	4	SK	Silcrete_Reflection_00004	10B	South Africa	4	Dorsal	D9	Training	Heated	Heated
D9.1.10B.31	5	SK	Silcrete_Reflection_00005	10B	South Africa	5	Ventral	D9	Training	Heated	Heated
D9.1.10B.31	7	SK	Silcrete_Reflection_00007	10B	South Africa	7	Ventral	D9	Training	Heated	Heated
D9.1.10B.31	8	SK	Silcrete_Reflection_00008	10B	South Africa	8	Ventral	D9	Training	Heated	Heated
D9.1.10B.6A	297	SK	Silcrete_Reflection_00297	10B	South Africa	1	Dorsal	D9	Training	Heated	Heated	1
D9.1.10B.6A	298	SK	Silcrete_Reflection_00298	10B	South Africa	2	Dorsal	D9	Training	Heated	Heated
D9.1.10B.6A	299	SK	Silcrete_Reflection_00299	10B	South Africa	3	Dorsal	D9	Training	Heated	Heated
D9.1.10B.6A	300	SK	Silcrete_Reflection_00300	10B	South Africa	4	Dorsal	D9	Training	Heated	Heated
D9.1.10B.6A	301	SK	Silcrete_Reflection_00301	10B	South Africa	5	Ventral	D9	Training	Heated	Heated
D9.1.10B.6A	302	SK	Silcrete_Reflection_00302	10B	South Africa	6	Ventral	D9	Training	Heated	Heated
D9.1.10B.6A	303	SK	Silcrete_Reflection_00303	10B	South Africa	7	Ventral	D9	Training	Heated	Heated
D9.1.10B.6A	304	SK	Silcrete_Reflection_00304	10B	South Africa	8	Ventral	D9	Training	Heated	Heated
D9.1.10B.6A	317	ET	Silcrete_Reflection_00317	10B	South Africa	1	Ventral	D9	Training	Heated	Heated
D9.1.10B.6A	318	ET	Silcrete_Reflection_00318	10B	South Africa	2	Ventral	D9	Training	Heated	Heated
D9.1.10B.6A	319	ET	Silcrete_Reflection_00319	10B	South Africa	3	Ventral	D9	Training	Heated	Heated
D9.1.10B.6A	320	ET	Silcrete_Reflection_00320	10B	South Africa	4	Ventral	D9	Training	Heated	Heated
D9.1.10B.6A	321	ET	Silcrete_Reflection_00321	10B	South Africa	5	Dorsal	D9	Training	Heated	Heated
D9.1.10B.6A	322	ET	Silcrete_Reflection_00322	10B	South Africa	6	Dorsal	D9	Training	Heated	Heated
D9.1.10B.6A	323	ET	Silcrete_Reflection_00323	10B	South Africa	7	Dorsal	D9	Training	Heated	Heated
D9.1.10B.6A	324	ET	Silcrete_Reflection_00324	10B	South Africa	8	Dorsal	D9	Training	Heated	Heated
D9.1.10B.6B	305	SK	Silcrete_Reflection_00305	10B	South Africa	1	Dorsal	D9	Training	Heated	Heated	1
D9.1.10B.6B	306	SK	Silcrete_Reflection_00306	10B	South Africa	2	Dorsal	D9	Training	Heated	Heated
D9.1.10B.6B	307	SK	Silcrete_Reflection_00307	10B	South Africa	3	Dorsal	D9	Training	Heated	Heated
D9.1.10B.6B	308	SK	Silcrete_Reflection_00308	10B	South Africa	4	Dorsal	D9	Training	Heated	Heated
D9.1.10B.6B	309	ET	Silcrete_Reflection_00309	10B	South Africa	5	Ventral	D9	Training	Heated	Heated
D9.1.10B.6B	310	ET	Silcrete_Reflection_00310	10B	South Africa	6	Ventral	D9	Training	Heated	Heated
D9.1.10B.6B	311	ET	Silcrete_Reflection_00311	10B	South Africa	7	Ventral	D9	Training	Heated	Heated
D9.1.10B.6B	312	ET	Silcrete_Reflection_00312	10B	South Africa	8	Ventral	D9	Training	Heated	Heated
D9.1.10B.6B	313	ET	Silcrete_Reflection_00313	10B	South Africa	1	Dorsal	D9	Training	Heated	Unheated
D9.1.10B.6B	314	ET	Silcrete_Reflection_00314	10B	South Africa	2	Dorsal	D9	Training	Heated	Heated
D9.1.10B.6B	315	ET	Silcrete_Reflection_00315	10B	South Africa	3	Dorsal	D9	Training	Heated	Heated
D9.1.10B.6B	316	ET	Silcrete_Reflection_00316	10B	South Africa	4	Dorsal	D9	Training	Heated	Heated
D9.1.10B.6B	361	SK	Silcrete_Reflection_00361	10B	South Africa	5	Ventral	D9	Training	Heated	Heated
D9.1.10B.6B	362	SK	Silcrete_Reflection_00362	10B	South Africa	6	Ventral	D9	Training	Heated	Heated
D9.1.10B.6B	363	SK	Silcrete_Reflection_00363	10B	South Africa	7	Ventral	D9	Training	Heated	Heated
D9.1.10B.6B	364	SK	Silcrete_Reflection_00364	10B	South Africa	8	Ventral	D9	Training	Heated	Heated
D9.1.12B.18	664	JM	Silcrete_Reflection_00664	12B	South Africa	2	Dorsal	D9	Training	Heated	Heated	1
D9.1.12B.18	665	JM	Silcrete_Reflection_00665	12B	South Africa	3	Dorsal	D9	Training	Heated	Unheated
D9.1.12B.18	666	JM	Silcrete_Reflection_00666	12B	South Africa	4	Dorsal	D9	Training	Heated	Heated
D9.1.12B.18	667	JM	Silcrete_Reflection_00667	12B	South Africa	5	Ventral	D9	Training	Heated	Heated
D9.1.12B.18	668	JM	Silcrete_Reflection_00668	12B	South Africa	6	Ventral	D9	Training	Heated	Heated
D9.1.12B.18	669	JM	Silcrete_Reflection_00669	12B	South Africa	7	Ventral	D9	Training	Heated	Heated
D9.1.12B.18	670	JM	Silcrete_Reflection_00670	12B	South Africa	8	Ventral	D9	Training	Heated	Heated
D9.1.12B.22	647	JM	Silcrete_Reflection_00647	12B	South Africa	1	Dorsal	D9	Training	Heated	Heated	1
D9.1.12B.22	648	JM	Silcrete_Reflection_00648	12B	South Africa	2	Dorsal	D9	Training	Heated	Heated
D9.1.12B.22	649	JM	Silcrete_Reflection_00649	12B	South Africa	3	Dorsal	D9	Training	Heated	Heated
D9.1.12B.22	650	JM	Silcrete_Reflection_00650	12B	South Africa	4	Dorsal	D9	Training	Heated	Heated
D9.1.12B.22	651	JM	Silcrete_Reflection_00651	12B	South Africa	5	Ventral	D9	Training	Heated	Heated
D9.1.12B.22	652	JM	Silcrete_Reflection_00652	12B	South Africa	6	Ventral	D9	Training	Heated	Heated
D9.1.12B.22	653	JM	Silcrete_Reflection_00653	12B	South Africa	7	Ventral	D9	Training	Heated	Heated
D9.1.12B.22	654	JM	Silcrete_Reflection_00654	12B	South Africa	8	Ventral	D9	Training	Heated	Heated
D9.1.12B.27a	679	JM	Silcrete_Reflection_00679	12B	South Africa	1	Dorsal	D9	Training	Heated	Unheated	1
D9.1.12B.27a	680	JM	Silcrete_Reflection_00680	12B	South Africa	2	Dorsal	D9	Training	Heated	Unheated
D9.1.12B.27a	681	JM	Silcrete_Reflection_00681	12B	South Africa	3	Dorsal	D9	Training	Heated	Unheated
D9.1.12B.27a	682	JM	Silcrete_Reflection_00682	12B	South Africa	4	Dorsal	D9	Training	Heated	Heated
D9.1.12B.27a	683	JM	Silcrete_Reflection_00683	12B	South Africa	5	Ventral	D9	Training	Heated	Heated
D9.1.12B.27a	684	JM	Silcrete_Reflection_00684	12B	South Africa	6	Ventral	D9	Training	Heated	Heated
D9.1.12B.27a	685	JM	Silcrete_Reflection_00685	12B	South Africa	7	Ventral	D9	Training	Heated	Heated
D9.1.12B.27a	686	JM	Silcrete_Reflection_00686	12B	South Africa	8	Ventral	D9	Training	Heated	Heated
D9.1.12B.29	671	JM	Silcrete_Reflection_00671	12B	South Africa	1	Dorsal	D9	Training	Heated	Heated	1
D9.1.12B.29	672	JM	Silcrete_Reflection_00672	12B	South Africa	2	Dorsal	D9	Training	Heated	Heated
D9.1.12B.29	673	JM	Silcrete_Reflection_00673	12B	South Africa	3	Dorsal	D9	Training	Heated	Heated
D9.1.12B.29	674	JM	Silcrete_Reflection_00674	12B	South Africa	4	Dorsal	D9	Training	Heated	Heated
D9.1.12B.29	675	JM	Silcrete_Reflection_00675	12B	South Africa	5	Ventral	D9	Training	Heated	Heated
D9.1.12B.29	676	JM	Silcrete_Reflection_00676	12B	South Africa	6	Ventral	D9	Training	Heated	Heated
D9.1.12B.29	677	JM	Silcrete_Reflection_00677	12B	South Africa	7	Ventral	D9	Training	Heated	Heated
D9.1.12B.29	678	JM	Silcrete_Reflection_00678	12B	South Africa	8	Ventral	D9	Training	Heated	Heated
D9.1.12B.37	655	JM	Silcrete_Reflection_00655	12B	South Africa	1	Dorsal	D9	Training	Heated	Heated	1
D9.1.12B.37	656	JM	Silcrete_Reflection_00656	12B	South Africa	2	Dorsal	D9	Training	Heated	Heated
D9.1.12B.37	657	JM	Silcrete_Reflection_00657	12B	South Africa	3	Dorsal	D9	Training	Heated	Heated
[truncated: 508 more rows]

## Sheet: Misclassification rates
k-NN Model C_k=5									k-NN Model D_k=3
[truncated: 37 more rows]
